# Supplementary material for: VUS. Life: Leveraging Vector Embeddings for Rapid and Accurate Pathogenicity Prediction of Genetic Variants
Source: Research Square preprint supplement (doi:10.21203/rs.3.rs-8605164/v1), 2026-01-21
Supplement: Supplementary file 1 [file a800f6e3ad99a3774faa695a.xlsx]

## Sheet: BRCA1 (training)
chromosome	position	ref_allele	alt_allele	gene_symbol	hgvs_genomic_38	hgvs_coding	hgvs_protein	pathogenicity_original
17	43093274	T	TTA	BRCA1	NC_000017.11:g.43093275_43093276dup	NM_007294.4:c.2255_2256dup	S753*	pathogenic
17	43078973	A	G	BRCA1	NC_000017.11:g.43078973A>G	NM_007294.4:c.4358-2359T>C	?	benign
17	43094594	A	G	BRCA1	NC_000017.11:g.43094594A>G	NM_007294.4:c.937T>C	L313=	likely_benign
17	43106488	C	CT	BRCA1	NC_000017.11:g.43106489dup	NM_007294.4:c.179dup	C61Vfs*5	pathogenic
17	43060530	C	T	BRCA1	NC_000017.11:g.43060530C>T	NM_007294.4:c.5193+2803G>A	?	benign
17	43074486	C	G	BRCA1	NC_000017.11:g.43074486C>G	NM_007294.4:c.4520G>C	R1507T	benign
17	43091759	CC	G	BRCA1	NC_000017.11:g.43091759_43091760delinsG	NM_007294.4:c.3771_3772delinsC	E1257Dfs*7	pathogenic
17	43074719	GGGGTT	G	BRCA1	NC_000017.11:g.43074720_43074724del	NM_007294.4:c.4485-203_4485-199del	?	benign
17	43091690	G	A	BRCA1	NC_000017.11:g.43091690G>A	NM_007294.4:c.3841C>T	Q1281*	pathogenic
17	43094217	CTCAT	C	BRCA1	NC_000017.11:g.43094218_43094221del	NM_007294.4:c.1310_1313del	H437Rfs*3	pathogenic
17	43104908	C	T	BRCA1	NC_000017.11:g.43104908C>T	NM_007294.4:c.261G>A	L87=	likely_benign
17	43092804	AT	A	BRCA1	NC_000017.11:g.43092805del	NM_007294.4:c.2726del	N909Ifs*91	pathogenic
17	43047658	CCT	C	BRCA1	NC_000017.11:g.43047659_43047660del	NM_007294.4:c.5450_5451del	E1817Gfs*12	pathogenic
17	43094089	A	AT	BRCA1	NC_000017.11:g.43094089_43094090insT	NM_007294.4:c.1441_1442insA	L481Hfs*9	pathogenic
17	43063930	C	T	BRCA1	NC_000017.11:g.43063930C>T	NM_007294.4:c.5096G>A	R1699Q	pathogenic
17	43066355	A	G	BRCA1	NC_000017.11:g.43066355A>G	NM_007294.4:c.5074+1253T>C	?	benign
17	43091880	A	AT	BRCA1	NC_000017.11:g.43091880_43091881insT	NM_007294.4:c.3650_3651insA	S1218*	pathogenic
17	43057045	GCTTTAC	G	BRCA1	NC_000017.11:g.43057046_43057051del	NM_007294.4:c.5277+1_5277+6del	?	pathogenic
17	43093775	GTTCAGCT	G	BRCA1	NC_000017.11:g.43093776_43093782del	NM_007294.4:c.1749_1755del	K583Nfs*3	pathogenic
17	43094562	TCCAGC	T	BRCA1	NC_000017.11:g.43094563_43094567del	NM_007294.4:c.964_968del	A322Kfs*2	pathogenic
17	43091759	C	A	BRCA1	NC_000017.11:g.43091759C>A	NM_007294.4:c.3772G>T	E1258*	pathogenic
17	43091889	C	T	BRCA1	NC_000017.11:g.43091889C>T	NM_007294.4:c.3642G>A	E1214=	likely_benign
17	43094569	CA	C	BRCA1	NC_000017.11:g.43094570del	NM_007294.4:c.961del	W321Gfs*20	pathogenic
17	43104173	G	T	BRCA1	NC_000017.11:g.43104173G>T	NM_007294.4:c.390C>A	Y130*	pathogenic
17	43093222	G	T	BRCA1	NC_000017.11:g.43093222G>T	NM_007294.4:c.2309C>A	S770*	pathogenic
17	43094826	ATTTGT	A	BRCA1	NC_000017.11:g.43094827_43094831del	NM_007294.4:c.700_704del	T234Yfs*2	pathogenic
17	43118338	T	C	BRCA1	NC_000017.11:g.43118338T>C	NM_007294.4:c.81-2559A>G	?	benign
17	43074016	T	G	BRCA1	NC_000017.11:g.43074016T>G	NM_007294.4:c.4675+315A>C	?	benign
17	43091919	T	C	BRCA1	NC_000017.11:g.43091919T>C	NM_007294.4:c.3612A>G	R1204=	likely_benign
17	43045758	CCCACTCTCGGGTCA	C	BRCA1	NC_000017.11:g.43045759_43045772del	NM_007294.4:c.5498_5511del	V1833Gfs*42	pathogenic
17	43093649	T	TGG	BRCA1	NC_000017.11:g.43093649_43093650insGG	NM_007294.4:c.1881_1882insCC	S628Pfs*5	pathogenic
17	43085427	A	G	BRCA1	NC_000017.11:g.43085427A>G	NM_007294.4:c.4186-2852T>C	?	benign
17	43070943	C	T	BRCA1	NC_000017.11:g.43070943C>T	NM_007294.4:c.4971G>A	L1657=	likely_benign
17	43063360	A	AG	BRCA1	NC_000017.11:g.43063361dup	NM_007294.4:c.5165dup	I1723Yfs*2	pathogenic
17	43074498	G	T	BRCA1	NC_000017.11:g.43074498G>T	NM_007294.4:c.4508C>A	S1503*	pathogenic
17	43093803	T	C	BRCA1	NC_000017.11:g.43093803T>C	NM_007294.4:c.1728A>G	K576=	likely_benign
17	43093682	TAGA	T	BRCA1	NC_000017.11:g.43093683_43093685del	NM_007294.4:c.1846_1848del	S616del	benign
17	43092051	CT	C	BRCA1	NC_000017.11:g.43092052del	NM_007294.4:c.3479del	K1160Rfs*50	pathogenic
17	43092876	GA	G	BRCA1	NC_000017.11:g.43092877del	NM_007294.4:c.2654del	F885Sfs*8	pathogenic
17	43049182	C	T	BRCA1	NC_000017.11:g.43049182C>T	NM_007294.4:c.5345G>A	W1782*	pathogenic
17	43114390	C	CT	BRCA1	NC_000017.11:g.43114391dup	NM_007294.4:c.134+1335dup	?	benign
17	43092396	ATTAATATTGC	A	BRCA1	NC_000017.11:g.43092397_43092406del	NM_007294.4:c.3125_3134del	S1042Mfs*3	pathogenic
17	43093790	T	A	BRCA1	NC_000017.11:g.43093790T>A	NM_007294.4:c.1741A>T	K581*	pathogenic
17	43082439	T	TC	BRCA1	NC_000017.11:g.43082440dup	NM_007294.4:c.4321dup	D1441Gfs*21	pathogenic
17	43092600	T	TGG	BRCA1	NC_000017.11:g.43092601_43092602dup	NM_007294.4:c.2929_2930dup	Y978Hfs*23	pathogenic
17	43092560	TA	T	BRCA1	NC_000017.11:g.43092561del	NM_007294.4:c.2970del	T992Lfs*8	pathogenic
17	43092597	A	T	BRCA1	NC_000017.11:g.43092597A>T	NM_007294.4:c.2934T>A	Y978*	pathogenic
17	43057147	C	T	BRCA1	NC_000017.11:g.43057147C>T	NM_007294.4:c.5194-12G>A	?	pathogenic
17	43092337	T	TC	BRCA1	NC_000017.11:g.43092338dup	NM_007294.4:c.3193dup	D1065Gfs*2	pathogenic
17	43082517	TC	T	BRCA1	NC_000017.11:g.43082518del	NM_007294.4:c.4243del	E1415Kfs*4	pathogenic
17	43057054	TTCTGTCC	T	BRCA1	NC_000017.11:g.43057055_43057061del	NM_007294.4:c.5268_5274del	D1757Rfs*6	pathogenic
17	43104193	T	C	BRCA1	NC_000017.11:g.43104193T>C	NM_007294.4:c.370A>G	I124V	benign
17	43104190	TG	T	BRCA1	NC_000017.11:g.43104191del	NM_007294.4:c.372del	I125Sfs*38	pathogenic
17	43057080	T	TGA	BRCA1	NC_000017.11:g.43057080_43057081insGA	NM_007294.4:c.5248_5249insTC	K1750Ifs*16	pathogenic
17	43104191	G	T	BRCA1	NC_000017.11:g.43104191G>T	NM_007294.4:c.372C>A	I124=	likely_benign
17	43124195	ATAAAG	A	BRCA1	NC_000017.11:g.43124196_43124200del	NM_007294.4:c.-19-85_-19-81del	?	benign
17	43092194	ATTCT	A	BRCA1	NC_000017.11:g.43092195_43092198del	NM_007294.4:c.3333_3336del	Q1111Hfs*5	pathogenic
17	43092680	T	TG	BRCA1	NC_000017.11:g.43092680_43092681insG	NM_007294.4:c.2850_2851insC	R951Qfs*20	pathogenic
17	43094607	GCT	A	BRCA1	NC_000017.11:g.43094607_43094609delinsA	NM_007294.4:c.922_924delinsT	S308*	pathogenic
17	43091573	AAC	A	BRCA1	NC_000017.11:g.43091574_43091575del	NM_007294.4:c.3956_3957del	G1319Vfs*10	pathogenic
17	43067655	A	T	BRCA1	NC_000017.11:g.43067655A>T	NM_007294.4:c.5027T>A	L1676*	pathogenic
17	43082508	A	C	BRCA1	NC_000017.11:g.43082508A>C	NM_007294.4:c.4253T>G	L1418*	pathogenic
17	43049164	C	A	BRCA1	NC_000017.11:g.43049164C>A	NM_007294.4:c.5363G>T	G1788V	pathogenic
17	43065990	T	C	BRCA1	NC_000017.11:g.43065990T>C	NM_007294.4:c.5074+1618A>G	?	benign
17	43094157	G	A	BRCA1	NC_000017.11:g.43094157G>A	NM_007294.4:c.1374C>T	D458=	likely_benign
17	43093177	A	T	BRCA1	NC_000017.11:g.43093177A>T	NM_007294.4:c.2354T>A	L785*	pathogenic
17	43092563	CA	C	BRCA1	NC_000017.11:g.43092564del	NM_007294.4:c.2967del	F989Lfs*11	pathogenic
17	43091751	TA	T	BRCA1	NC_000017.11:g.43091752del	NM_007294.4:c.3779del	L1260Yfs*4	pathogenic
17	43091794	GT	G	BRCA1	NC_000017.11:g.43091795del	NM_007294.4:c.3736del	T1246Pfs*18	pathogenic
17	43091525	TCAGA	T	BRCA1	NC_000017.11:g.43091526_43091529del	NM_007294.4:c.4002_4005del	L1335Vfs*30	pathogenic
17	43057122	A	G	BRCA1	NC_000017.11:g.43057122A>G	NM_007294.4:c.5207T>C	V1736A	pathogenic
17	43094179	G	C	BRCA1	NC_000017.11:g.43094179G>C	NM_007294.4:c.1352C>G	S451*	pathogenic
17	43051075	T	TG	BRCA1	NC_000017.11:g.43051076dup	NM_007294.4:c.5319dup	N1774Qfs*56	pathogenic
17	43093336	TCTTTTTC	CCTTTTT	BRCA1	NC_000017.11:g.43093336_43093343delinsCCTTTTT	NM_007294.4:c.2188_2195delinsAAAAAGG	E730Kfs*6	pathogenic
17	43091937	C	CAA	BRCA1	NC_000017.11:g.43091938_43091939dup	NM_007294.4:c.3592_3593dup	L1198Ffs*13	pathogenic
17	43093101	GT	G	BRCA1	NC_000017.11:g.43093102del	NM_007294.4:c.2429del	N810Tfs*5	pathogenic
17	43092552	T	C	BRCA1	NC_000017.11:g.43092552T>C	NM_007294.4:c.2979A>G	K993=	likely_benign
17	43094748	A	C	BRCA1	NC_000017.11:g.43094748A>C	NM_007294.4:c.783T>G	Y261*	pathogenic
17	43093377	A	C	BRCA1	NC_000017.11:g.43093377A>C	NM_007294.4:c.2154T>G	L718=	likely_benign
17	43091485	G	A	BRCA1	NC_000017.11:g.43091485G>A	NM_007294.4:c.4046C>T	T1349M	benign
17	43067617	TAAC	T	BRCA1	NC_000017.11:g.43067618_43067620del	NM_007294.4:c.5062_5064del	V1688del	pathogenic
17	43092872	C	CT	BRCA1	NC_000017.11:g.43092872_43092873insT	NM_007294.4:c.2658_2659insA	A887Sfs*16	pathogenic
17	43093879	C	CG	BRCA1	NC_000017.11:g.43093879_43093880insG	NM_007294.4:c.1651_1652insC	S551Tfs*4	pathogenic
17	43092857	A	G	BRCA1	NC_000017.11:g.43092857A>G	NM_007294.4:c.2674T>C	L892=	likely_benign
17	43094644	CT	C	BRCA1	NC_000017.11:g.43094645del	NM_007294.4:c.886del	R296Efs*2	pathogenic
17	43093578	CT	C	BRCA1	NC_000017.11:g.43093579del	NM_007294.4:c.1952del	K651Rfs*50	pathogenic
17	43094233	GC	G	BRCA1	NC_000017.11:g.43094234del	NM_007294.4:c.1297del	A433Pfs*8	pathogenic
17	43124076	G	A	BRCA1	NC_000017.11:g.43124076G>A	NM_007294.4:c.21C>T	R7=	benign
17	43091859	G	GGGAA	BRCA1	NC_000017.11:g.43091860_43091863dup	NM_007294.4:c.3668_3671dup	C1225Sfs*10	pathogenic
17	43104227	AT	A	BRCA1	NC_000017.11:g.43104228del	NM_007294.4:c.335del	N112Ifs*7	pathogenic
17	43067676	GC	G	BRCA1	NC_000017.11:g.43067677del	NM_007294.4:c.5005del	A1669Pfs*8	pathogenic
17	43119034	G	A	BRCA1	NC_000017.11:g.43119034G>A	NM_007294.4:c.81-3255C>T	?	benign
17	43094194	CTT	C	BRCA1	NC_000017.11:g.43094195_43094196del	NM_007294.4:c.1335_1336del	R446Sfs*9	pathogenic
17	43045759	CCACTCTCGGGTCACCACAGGTGCCT	C	BRCA1	NC_000017.11:g.43045760_43045784del	NM_007294.4:c.5486_5510del	E1829Gfs*6	pathogenic
17	43094051	G	A	BRCA1	NC_000017.11:g.43094051G>A	NM_007294.4:c.1480C>T	Q494*	pathogenic
17	43093334	CTTCT	C	BRCA1	NC_000017.11:g.43093335_43093338del	NM_007294.4:c.2193_2196del	E732Rfs*3	pathogenic
17	43093353	AAG	A	BRCA1	NC_000017.11:g.43093354_43093355del	NM_007294.4:c.2176_2177del	L726Sfs*13	pathogenic
17	43093955	GA	G	BRCA1	NC_000017.11:g.43093956del	NM_007294.4:c.1575del	Q526Kfs*6	pathogenic
17	43108791	A	G	BRCA1	NC_000017.11:g.43108791A>G	NM_007294.4:c.135-2258T>C	?	benign
17	43045770	TCACC	T	BRCA1	NC_000017.11:g.43045771_43045774del	NM_007294.4:c.5496_5499del	V1833Pfs*9	pathogenic
17	43094342	CA	C	BRCA1	NC_000017.11:g.43094343del	NM_007294.4:c.1188del	D396Efs*14	pathogenic
17	43093548	C	T	BRCA1	NC_000017.11:g.43093548C>T	NM_007294.4:c.1983G>A	R661=	likely_benign
17	43093179	C	T	BRCA1	NC_000017.11:g.43093179C>T	NM_007294.4:c.2352G>A	S784=	likely_benign
17	43091697	C	T	BRCA1	NC_000017.11:g.43091697C>T	NM_007294.4:c.3834G>A	K1278=	likely_benign
17	43099820	TTG	T	BRCA1	NC_000017.11:g.43099821_43099822del	NM_007294.4:c.500_501del	T167Kfs*14	pathogenic
17	43070985	T	G	BRCA1	NC_000017.11:g.43070985T>G	NM_007294.4:c.4929A>C	T1643=	likely_benign
17	43116729	G	A	BRCA1	NC_000017.11:g.43116729G>A	NM_007294.4:c.81-950C>T	?	benign
17	43104233	CT	C	BRCA1	NC_000017.11:g.43104234del	NM_007294.4:c.329del	K110Rfs*9	pathogenic
17	43092597	A	C	BRCA1	NC_000017.11:g.43092597A>C	NM_007294.4:c.2934T>G	Y978*	pathogenic
17	43115501	CA	C	BRCA1	NC_000017.11:g.43115502del	NM_007294.4:c.134+224del	?	benign
17	43092913	GA	G	BRCA1	NC_000017.11:g.43092914del	NM_007294.4:c.2617del	S873Qfs*20	pathogenic
17	43104950	T	C	BRCA1	NC_000017.11:g.43104950T>C	NM_007294.4:c.219A>G	L73=	likely_benign
17	43091677	AG	A	BRCA1	NC_000017.11:g.43091678del	NM_007294.4:c.3853del	S1286Vfs*21	pathogenic
17	43093309	G	GACACTTTAACTGTTTCTAGTTTCTCTTCTTTTTCTTCTCTTGGAAGGCTAGGATTGACAAATTCTTT	BRCA1	NC_000017.11:g.43093310_43093376dup	NM_007294.4:c.2155_2221dup	S741*	pathogenic
17	43091564	G	A	BRCA1	NC_000017.11:g.43091564G>A	NM_007294.4:c.3967C>T	Q1323*	pathogenic
17	43092648	GT	G	BRCA1	NC_000017.11:g.43092649del	NM_007294.4:c.2882del	N961Tfs*39	pathogenic
17	43092664	G	GA	BRCA1	NC_000017.11:g.43092665dup	NM_007294.4:c.2866dup	S956Ffs*15	pathogenic
17	43049140	GA	G	BRCA1	NC_000017.11:g.43049141del	NM_007294.4:c.5386del	S1796Hfs*38	pathogenic
17	43077369	T	C	BRCA1	NC_000017.11:g.43077369T>C	NM_007294.4:c.4358-755A>G	?	benign
17	43063353	C	A	BRCA1	NC_000017.11:g.43063353C>A	NM_007294.4:c.5173G>T	E1725*	pathogenic
17	43094183	TG	T	BRCA1	NC_000017.11:g.43094184del	NM_007294.4:c.1347del	K450Nfs*3	pathogenic
17	43049160	AG	A	BRCA1	NC_000017.11:g.43049161del	NM_007294.4:c.5366del	A1789Vfs*4	pathogenic
17	43092201	CTTTTT	C	BRCA1	NC_000017.11:g.43092202_43092206del	NM_007294.4:c.3325_3329del	K1109Afs*4	pathogenic
17	43095590	A	C	BRCA1	NC_000017.11:g.43095590A>C	NM_007294.4:c.670+256T>G	?	benign
17	43091904	T	C	BRCA1	NC_000017.11:g.43091904T>C	NM_007294.4:c.3627A>G	L1209=	likely_benign
17	43045751	TC	T	BRCA1	NC_000017.11:g.43045752del	NM_007294.4:c.5518del	D1840Tfs*3	pathogenic
17	43093087	A	AT	BRCA1	NC_000017.11:g.43093088dup	NM_007294.4:c.2443dup	I815Nfs*8	pathogenic
17	43067658	G	A	BRCA1	NC_000017.11:g.43067658G>A	NM_007294.4:c.5024C>T	T1675I	benign
17	43092318	T	C	BRCA1	NC_000017.11:g.43092318T>C	NM_007294.4:c.3213A>G	E1071=	likely_benign
17	43092135	G	A	BRCA1	NC_000017.11:g.43092135G>A	NM_007294.4:c.3396C>T	N1132=	likely_benign
17	43092358	ATACT	A	BRCA1	NC_000017.11:g.43092359_43092362del	NM_007294.4:c.3169_3172del	S1057Lfs*4	pathogenic
17	43048519	T	TC	BRCA1	NC_000017.11:g.43048519_43048520insC	NM_007294.4:c.5406+601_5406+602insG	?	benign
17	43094304	T	C	BRCA1	NC_000017.11:g.43094304T>C	NM_007294.4:c.1227A>G	V409=	likely_benign
17	43091668	TC	T	BRCA1	NC_000017.11:g.43091669del	NM_007294.4:c.3862del	E1288Kfs*19	pathogenic
17	43094147	CA	C	BRCA1	NC_000017.11:g.43094148del	NM_007294.4:c.1383del	F461Lfs*14	pathogenic
17	43094755	TC	T	BRCA1	NC_000017.11:g.43094756del	NM_007294.4:c.775del	E259Kfs*39	pathogenic
17	43093574	TTTTC	T	BRCA1	NC_000017.11:g.43093575_43093578del	NM_007294.4:c.1953_1956del	K653Sfs*47	pathogenic
17	43092179	G	GA	BRCA1	NC_000017.11:g.43092180dup	NM_007294.4:c.3351dup	Q1118Sfs*4	pathogenic
17	43091480	A	AC	BRCA1	NC_000017.11:g.43091480_43091481insC	NM_007294.4:c.4050_4051insG	L1351Vfs*5	pathogenic
17	43094238	T	TA	BRCA1	NC_000017.11:g.43094239dup	NM_007294.4:c.1292dup	L431Ffs*5	pathogenic
17	43094416	C	T	BRCA1	NC_000017.11:g.43094416C>T	NM_007294.4:c.1115G>A	W372*	pathogenic
17	43115738	TG	T	BRCA1	NC_000017.11:g.43115739del	NM_007294.4:c.121del	H41Tfs*9	pathogenic
17	43099409	TAC	T	BRCA1	NC_000017.11:g.43099410_43099411del	NM_007294.4:c.547+364_547+365del	?	benign
17	43093620	A	G	BRCA1	NC_000017.11:g.43093620A>G	NM_007294.4:c.1911T>C	T637=	likely_benign
17	43094712	T	C	BRCA1	NC_000017.11:g.43094712T>C	NM_007294.4:c.819A>G	P273=	likely_benign
17	43094826	AT	A	BRCA1	NC_000017.11:g.43094827del	NM_007294.4:c.704del	N235Ifs*12	pathogenic
17	43057079	CT	C	BRCA1	NC_000017.11:g.43057080del	NM_007294.4:c.5249del	K1750Sfs*15	pathogenic
17	43092964	T	TAATCA	BRCA1	NC_000017.11:g.43092964_43092965insAATCA	NM_007294.4:c.2566_2567insTGATT	Y856Lfs*39	pathogenic
17	43093572	T	C	BRCA1	NC_000017.11:g.43093572T>C	NM_007294.4:c.1959A>G	K653=	likely_benign
17	43074370	C	A	BRCA1	NC_000017.11:g.43074370C>A	NM_007294.4:c.4636G>T	D1546Y	benign
17	43067684	G	A	BRCA1	NC_000017.11:g.43067684G>A	NM_007294.4:c.4998C>T	Y1666=	likely_benign
17	43049184	TTC	CA	BRCA1	NC_000017.11:g.43049184_43049186delinsCA	NM_007294.4:c.5341_5343delinsTG	E1781Cfs*12	pathogenic
17	43081610	C	T	BRCA1	NC_000017.11:g.43081610C>T	NM_007294.4:c.4357+794G>A	?	benign
17	43094576	T	TAC	BRCA1	NC_000017.11:g.43094576_43094577insAC	NM_007294.4:c.954_955insGT	N319Vfs*23	pathogenic
17	43092245	G	A	BRCA1	NC_000017.11:g.43092245G>A	NM_007294.4:c.3286C>T	Q1096*	pathogenic
17	43093173	CA	C	BRCA1	NC_000017.11:g.43093174del	NM_007294.4:c.2357del	L786Rfs*6	pathogenic
17	43094038	AG	A	BRCA1	NC_000017.11:g.43094039del	NM_007294.4:c.1492del	L498Sfs*5	pathogenic
17	43092225	A	G	BRCA1	NC_000017.11:g.43092225A>G	NM_007294.4:c.3306T>C	N1102=	likely_benign
17	43093097	TG	T	BRCA1	NC_000017.11:g.43093098del	NM_007294.4:c.2433del	K812Rfs*3	pathogenic
17	43124089	A	C	BRCA1	NC_000017.11:g.43124089A>C	NM_007294.4:c.8T>G	L3*	pathogenic
17	43082476	AG	C	BRCA1	NC_000017.11:g.43082476_43082477delinsC	NM_007294.4:c.4284_4285delinsG	S1428Rfs*6	pathogenic
17	43092986	C	A	BRCA1	NC_000017.11:g.43092986C>A	NM_007294.4:c.2545G>T	E849*	pathogenic
17	43090737	T	TGTGCGC	BRCA1	NC_000017.11:g.43090738_43090743dup	NM_007294.4:c.4185+201_4185+206dup	?	benign
17	43093563	G	A	BRCA1	NC_000017.11:g.43093563G>A	NM_007294.4:c.1968C>T	N656=	likely_benign
17	43095847	C	T	BRCA1	NC_000017.11:g.43095847C>T	NM_007294.4:c.669G>A	K223=	likely_benign
17	43082503	G	A	BRCA1	NC_000017.11:g.43082503G>A	NM_007294.4:c.4258C>T	Q1420*	pathogenic
17	43092954	AT	A	BRCA1	NC_000017.11:g.43092955del	NM_007294.4:c.2576del	N859Ifs*34	pathogenic
17	43092113	T	C	BRCA1	NC_000017.11:g.43092113T>C	NM_007294.4:c.3418A>G	S1140G	benign
17	43104224	G	A	BRCA1	NC_000017.11:g.43104224G>A	NM_007294.4:c.339C>T	N113=	likely_benign
17	43092667	G	T	BRCA1	NC_000017.11:g.43092667G>T	NM_007294.4:c.2864C>A	S955*	pathogenic
17	43082539	G	A	BRCA1	NC_000017.11:g.43082539G>A	NM_007294.4:c.4222C>T	Q1408*	pathogenic
17	43124056	ACATT	A	BRCA1	NC_000017.11:g.43124057_43124060del	NM_007294.4:c.37_40del	N13Sfs*9	pathogenic
17	43071150	A	T	BRCA1	NC_000017.11:g.43071150A>T	NM_007294.4:c.4764T>A	A1588=	likely_benign
17	43092919	G	A	BRCA1	NC_000017.11:g.43092919G>A	NM_007294.4:c.2612C>T	P871L	benign
17	43098906	T	C	BRCA1	NC_000017.11:g.43098906T>C	NM_007294.4:c.547+869A>G	?	benign
17	43071111	T	C	BRCA1	NC_000017.11:g.43071111T>C	NM_007294.4:c.4803A>G	K1601=	likely_benign
17	43051983	C	G	BRCA1	NC_000017.11:g.43051983C>G	NM_007294.4:c.5278-866G>C	?	benign
17	43091173	T	G	BRCA1	NC_000017.11:g.43091173T>G	NM_007294.4:c.4097-141A>C	?	benign
17	43092454	A	ATGTGCTCACTGTACTTGGAATGATCTCATTTCCCATTTCTCTTTCAGGTGACATTGAATGTTCCTCAAAGTTTTCC	BRCA1	NC_000017.11:g.43092454_43092455insTGTGCTCACTGTACTTGGAATGATCTCATTTCCCATTTCTCTTTCAGGTGACATTGAATGTTCCTCAAAGTTTTCC	NM_007294.4:c.3076_3077insGGAAAACTTTGAGGAACATTCAATGTCACCTGAAAGAGAAATGGGAAATGAGATCATTCCAAGTACAGTGAGCACA	I1026Rfs*24	pathogenic
17	43092500	CAG	C	BRCA1	NC_000017.11:g.43092501_43092502del	NM_007294.4:c.3029_3030del	P1010Rfs*7	pathogenic
17	43092204	T	G	BRCA1	NC_000017.11:g.43092204T>G	NM_007294.4:c.3327A>C	K1109N	benign
17	43091846	A	G	BRCA1	NC_000017.11:g.43091846A>G	NM_007294.4:c.3685T>C	L1229=	likely_benign
17	43063877	A	AG	BRCA1	NC_000017.11:g.43063877_43063878insG	NM_007294.4:c.5148_5149insC	F1717Lfs*8	pathogenic
17	43092585	TG	T	BRCA1	NC_000017.11:g.43092586del	NM_007294.4:c.2945del	P982Hfs*18	pathogenic
17	43082476	A	AC	BRCA1	NC_000017.11:g.43082476_43082477insC	NM_007294.4:c.4284_4285insG	Y1429Vfs*7	pathogenic
17	43057070	T	C	BRCA1	NC_000017.11:g.43057070T>C	NM_007294.4:c.5259A>G	R1753=	likely_benign
17	43092659	A	AT	BRCA1	NC_000017.11:g.43092659_43092660insT	NM_007294.4:c.2871_2872insA	F958Ifs*13	pathogenic
17	43104917	TTCAACAAGTTG	T	BRCA1	NC_000017.11:g.43104918_43104928del	NM_007294.4:c.241_251del	Q81Rfs*12	pathogenic
17	43093150	G	GC	BRCA1	NC_000017.11:g.43093151dup	NM_007294.4:c.2380dup	A794Gfs*7	pathogenic
17	43094371	GAA	G	BRCA1	NC_000017.11:g.43094372_43094373del	NM_007294.4:c.1158_1159del	S387Qfs*3	pathogenic
17	43093144	GT	A	BRCA1	NC_000017.11:g.43093144_43093145delinsA	NM_007294.4:c.2386_2387delinsT	T796*	pathogenic
17	43094273	CT	C	BRCA1	NC_000017.11:g.43094274del	NM_007294.4:c.1257del	D420Mfs*10	pathogenic
17	43053035	C	T	BRCA1	NC_000017.11:g.43053035C>T	NM_007294.4:c.5278-1918G>A	?	benign
17	43094548	CAT	C	BRCA1	NC_000017.11:g.43094549_43094550del	NM_007294.4:c.981_982del	C328*	pathogenic
17	43104143	A	G	BRCA1	NC_000017.11:g.43104143A>G	NM_007294.4:c.420T>C	S140=	likely_benign
17	43074379	CAG	C	BRCA1	NC_000017.11:g.43074380_43074381del	NM_007294.4:c.4625_4626del	S1542Wfs*31	pathogenic
17	43092913	G	GA	BRCA1	NC_000017.11:g.43092914dup	NM_007294.4:c.2617dup	S873Ffs*30	pathogenic
17	43115163	C	T	BRCA1	NC_000017.11:g.43115163C>T	NM_007294.4:c.134+563G>A	?	benign
17	43094320	T	TAG	BRCA1	NC_000017.11:g.43094320_43094321insAG	NM_007294.4:c.1210_1211insCT	E404Afs*7	pathogenic
17	43076608	A	C	BRCA1	NC_000017.11:g.43076608A>C	NM_007294.4:c.4364T>G	L1455*	pathogenic
17	43074226	C	T	BRCA1	NC_000017.11:g.43074226C>T	NM_007294.4:c.4675+105G>A	?	benign
17	43095864	A	G	BRCA1	NC_000017.11:g.43095864A>G	NM_007294.4:c.652T>C	L218=	likely_benign
17	43094294	A	G	BRCA1	NC_000017.11:g.43094294A>G	NM_007294.4:c.1237T>C	L413=	likely_benign
17	43093501	CCA	C	BRCA1	NC_000017.11:g.43093502_43093503del	NM_007294.4:c.2028_2029del	G677Sfs*5	pathogenic
17	43124118	T	C	BRCA1	NC_000017.11:g.43124118T>C	NM_007294.4:c.-19-3A>G	?	benign
17	43100560	A	G	BRCA1	NC_000017.11:g.43100560A>G	NM_007294.4:c.442-680T>C	?	benign
17	43082422	G	A	BRCA1	NC_000017.11:g.43082422G>A	NM_007294.4:c.4339C>T	Q1447*	pathogenic
17	43091758	TCC	T	BRCA1	NC_000017.11:g.43091759_43091760del	NM_007294.4:c.3771_3772del	N1259Ffs*7	pathogenic
17	43092274	A	T	BRCA1	NC_000017.11:g.43092274A>T	NM_007294.4:c.3257T>A	L1086*	pathogenic
17	43121405	C	T	BRCA1	NC_000017.11:g.43121405C>T	NM_007294.4:c.80+2612G>A	?	benign
17	43100609	C	CAT	BRCA1	NC_000017.11:g.43100610_43100611dup	NM_007294.4:c.442-731_442-730dup	-	benign
17	43125443	A	G	BRCA1	NC_000017.11:g.43125443A>G	NM_007294.4:c.-192T>C	?	benign
17	43093493	T	A	BRCA1	NC_000017.11:g.43093493T>A	NM_007294.4:c.2038A>T	K680*	pathogenic
17	43093784	T	A	BRCA1	NC_000017.11:g.43093784T>A	NM_007294.4:c.1747A>T	K583*	pathogenic
17	43092420	T	TA	BRCA1	NC_000017.11:g.43092420_43092421insA	NM_007294.4:c.3110_3111insT	K1037Nfs*9	pathogenic
17	43073768	T	A	BRCA1	NC_000017.11:g.43073768T>A	NM_007294.4:c.4675+563A>T	?	benign
17	43091674	CT	C	BRCA1	NC_000017.11:g.43091675del	NM_007294.4:c.3856del	S1286Vfs*21	pathogenic
17	43104925	GT	G	BRCA1	NC_000017.11:g.43104926del	NM_007294.4:c.243del	Q81Hfs*7	pathogenic
17	43091818	G	A	BRCA1	NC_000017.11:g.43091818G>A	NM_007294.4:c.3713C>T	P1238L	benign
17	43098877	G	C	BRCA1	NC_000017.11:g.43098877G>C	NM_007294.4:c.547+898C>G	?	benign
17	43045784	T	TC	BRCA1	NC_000017.11:g.43045785dup	NM_007294.4:c.5485dup	E1829Gfs*51	pathogenic
17	43071223	A	G	BRCA1	NC_000017.11:g.43071223A>G	NM_007294.4:c.4691T>C	L1564P	benign
17	43076583	G	C	BRCA1	NC_000017.11:g.43076583G>C	NM_007294.4:c.4389C>G	Y1463*	pathogenic
17	43093742	C	T	BRCA1	NC_000017.11:g.43093742C>T	NM_007294.4:c.1789G>A	E597K	benign
17	43092731	GACCA	G	BRCA1	NC_000017.11:g.43092732_43092735del	NM_007294.4:c.2796_2799del	G933Rfs*66	pathogenic
17	43094340	GT	G	BRCA1	NC_000017.11:g.43094341del	NM_007294.4:c.1190del	D397Afs*13	pathogenic
17	43093401	A	TT	BRCA1	NC_000017.11:g.43093401delinsTT	NM_007294.4:c.2130delinsAA	C712Vfs*6	pathogenic
17	43092647	C	T	BRCA1	NC_000017.11:g.43092647C>T	NM_007294.4:c.2884G>A	E962K	benign
17	43091734	C	G	BRCA1	NC_000017.11:g.43091734C>G	NM_007294.4:c.3797G>C	S1266T	benign
17	43051581	C	T	BRCA1	NC_000017.11:g.43051581C>T	NM_007294.4:c.5278-464G>A	?	benign
17	43051094	A	T	BRCA1	NC_000017.11:g.43051094A>T	NM_007294.4:c.5301T>A	C1767*	pathogenic
17	43100574	C	CAT	BRCA1	NC_000017.11:g.43100575_43100576dup	NM_007294.4:c.442-696_442-695dup	-	benign
17	43106488	CTG	C	BRCA1	NC_000017.11:g.43106489_43106490del	NM_007294.4:c.178_179del	Q60Vfs*5	pathogenic
17	43092906	T	A	BRCA1	NC_000017.11:g.43092906T>A	NM_007294.4:c.2625A>T	P875=	likely_benign
17	43093453	T	TTA	BRCA1	NC_000017.11:g.43093453_43093454insTA	NM_007294.4:c.2077_2078insTA	D693Vfs*9	pathogenic
17	43093334	CTTCTT	C	BRCA1	NC_000017.11:g.43093335_43093339del	NM_007294.4:c.2192_2196del	K731Rfs*7	pathogenic
17	43104258	G	C	BRCA1	NC_000017.11:g.43104258G>C	NM_007294.4:c.305C>G	A102G	benign
17	43092389	CTACT	C	BRCA1	NC_000017.11:g.43092390_43092393del	NM_007294.4:c.3138_3141del	G1048Pfs*13	pathogenic
17	43092133	A	C	BRCA1	NC_000017.11:g.43092133A>C	NM_007294.4:c.3398T>G	L1133*	pathogenic
17	43091874	C	G	BRCA1	NC_000017.11:g.43091874C>G	NM_007294.4:c.3657G>C	E1219D	benign
17	43094378	A	AC	BRCA1	NC_000017.11:g.43094379dup	NM_007294.4:c.1152dup	W385Vfs*6	pathogenic
17	43091505	T	C	BRCA1	NC_000017.11:g.43091505T>C	NM_007294.4:c.4026A>G	S1342=	likely_benign
17	43091621	C	A	BRCA1	NC_000017.11:g.43091621C>A	NM_007294.4:c.3910G>T	E1304*	pathogenic
17	43070991	A	C	BRCA1	NC_000017.11:g.43070991A>C	NM_007294.4:c.4923T>G	A1641=	likely_benign
17	43092535	AG	TA	BRCA1	NC_000017.11:g.43092535_43092536delinsTA	NM_007294.4:c.2995_2996delinsTA	L999*	pathogenic
17	43092006	A	C	BRCA1	NC_000017.11:g.43092006A>C	NM_007294.4:c.3525T>G	A1175=	likely_benign
17	43093192	TGA	T	BRCA1	NC_000017.11:g.43093193_43093194del	NM_007294.4:c.2337_2338del	Q780Gfs*9	pathogenic
17	43118446	G	A	BRCA1	NC_000017.11:g.43118446G>A	NM_007294.4:c.81-2667C>T	?	benign
17	43071004	G	A	BRCA1	NC_000017.11:g.43071004G>A	NM_007294.4:c.4910C>T	P1637L	benign
17	43091746	G	T	BRCA1	NC_000017.11:g.43091746G>T	NM_007294.4:c.3785C>A	S1262*	pathogenic
17	43092213	AG	A	BRCA1	NC_000017.11:g.43092214del	NM_007294.4:c.3317del	P1106Lfs*3	pathogenic
17	43094277	C	T	BRCA1	NC_000017.11:g.43094277C>T	NM_007294.4:c.1254G>A	E418=	likely_benign
17	43094376	C	T	BRCA1	NC_000017.11:g.43094376C>T	NM_007294.4:c.1155G>A	W385*	pathogenic
17	43093974	CT	C	BRCA1	NC_000017.11:g.43093975del	NM_007294.4:c.1556del	K519Rfs*13	pathogenic
17	43124013	T	A	BRCA1	NC_000017.11:g.43124013T>A	NM_007294.4:c.80+4A>T	?	pathogenic
17	43092052	TTT	G	BRCA1	NC_000017.11:g.43092052_43092054delinsG	NM_007294.4:c.3477_3479delinsC	K1160Gfs*4	pathogenic
17	43092974	C	CA	BRCA1	NC_000017.11:g.43092975dup	NM_007294.4:c.2556dup	D853*	pathogenic
17	43070955	C	T	BRCA1	NC_000017.11:g.43070955C>T	NM_007294.4:c.4959G>A	V1653=	likely_benign
17	43070958	C	T	BRCA1	NC_000017.11:g.43070958C>T	NM_007294.4:c.4956G>A	M1652I	benign
17	43091445	AT	A	BRCA1	NC_000017.11:g.43091446del	NM_007294.4:c.4085del	D1362Vfs*4	pathogenic
17	43093878	A	AG	BRCA1	NC_000017.11:g.43093878_43093879insG	NM_007294.4:c.1652_1653insC	G552Wfs*3	pathogenic
17	43052360	A	G	BRCA1	NC_000017.11:g.43052360A>G	NM_007294.4:c.5278-1243T>C	?	benign
17	43071150	A	G	BRCA1	NC_000017.11:g.43071150A>G	NM_007294.4:c.4764T>C	A1588=	likely_benign
17	43082575	G	A	BRCA1	NC_000017.11:g.43082575G>A	NM_007294.4:c.4186C>T	Q1396*	pathogenic
17	43094697	A	C	BRCA1	NC_000017.11:g.43094697A>C	NM_007294.4:c.834T>G	T278=	likely_benign
17	43074473	G	GT	BRCA1	NC_000017.11:g.43074474dup	NM_007294.4:c.4532dup	H1511Qfs*10	pathogenic
17	43115754	AGACAGGTT	A	BRCA1	NC_000017.11:g.43115755_43115762del	NM_007294.4:c.98_105del	E33Vfs*5	pathogenic
17	43091764	G	GT	BRCA1	NC_000017.11:g.43091765dup	NM_007294.4:c.3766dup	T1256Nfs*11	pathogenic
17	43093053	TG	T	BRCA1	NC_000017.11:g.43093054del	NM_007294.4:c.2477del	T826Kfs*20	pathogenic
17	43092018	CT	C	BRCA1	NC_000017.11:g.43092019del	NM_007294.4:c.3512del	K1171Rfs*39	pathogenic
17	43062603	T	A	BRCA1	NC_000017.11:g.43062603T>A	NM_007294.4:c.5193+730A>T	?	benign
17	43093394	AAC	A	BRCA1	NC_000017.11:g.43093395_43093396del	NM_007294.4:c.2135_2136del	C712Ffs*5	pathogenic
17	43045748	CT	C	BRCA1	NC_000017.11:g.43045749del	NM_007294.4:c.5521del	S1841Vfs*2	pathogenic
17	43124061	T	C	BRCA1	NC_000017.11:g.43124061T>C	NM_007294.4:c.36A>G	Q12=	likely_benign
17	43067684	G	T	BRCA1	NC_000017.11:g.43067684G>T	NM_007294.4:c.4998C>A	Y1666*	pathogenic
17	43057091	GT	G	BRCA1	NC_000017.11:g.43057092del	NM_007294.4:c.5237del	H1746Pfs*19	pathogenic
17	43082429	A	G	BRCA1	NC_000017.11:g.43082429A>G	NM_007294.4:c.4332T>C	N1444=	likely_benign
17	43104185	T	C	BRCA1	NC_000017.11:g.43104185T>C	NM_007294.4:c.378A>G	Q126=	likely_benign
17	43091462	CTTGA	C	BRCA1	NC_000017.11:g.43091463_43091466del	NM_007294.4:c.4065_4068del	N1355Kfs*10	pathogenic
17	43082536	G	A	BRCA1	NC_000017.11:g.43082536G>A	NM_007294.4:c.4225C>T	Q1409*	pathogenic
17	43045728	G	A	BRCA1	NC_000017.11:g.43045728G>A	NM_007294.4:c.5542C>T	Q1848*	pathogenic
17	43094313	AT	A	BRCA1	NC_000017.11:g.43094314del	NM_007294.4:c.1217del	N406Mfs*4	pathogenic
17	43057063	G	A	BRCA1	NC_000017.11:g.43057063G>A	NM_007294.4:c.5266C>T	Q1756*	pathogenic
17	43099808	G	A	BRCA1	NC_000017.11:g.43099808G>A	NM_007294.4:c.514C>T	Q172*	pathogenic
17	43094020	CG	C	BRCA1	NC_000017.11:g.43094021del	NM_007294.4:c.1510del	R504Vfs*28	pathogenic
17	43093713	AG	A	BRCA1	NC_000017.11:g.43093714del	NM_007294.4:c.1817del	P606Lfs*6	pathogenic
17	43116191	C	CT	BRCA1	NC_000017.11:g.43116192dup	NM_007294.4:c.81-413dup	?	benign
17	43104938	C	G	BRCA1	NC_000017.11:g.43104938C>G	NM_007294.4:c.231G>C	T77=	likely_benign
17	43092335	C	A	BRCA1	NC_000017.11:g.43092335C>A	NM_007294.4:c.3196G>T	E1066*	pathogenic
17	43094668	C	CTG	BRCA1	NC_000017.11:g.43094669_43094670dup	NM_007294.4:c.861_862dup	S288Tfs*11	pathogenic
17	43104926	T	C	BRCA1	NC_000017.11:g.43104926T>C	NM_007294.4:c.243A>G	Q81=	likely_benign
17	43110174	G	A	BRCA1	NC_000017.11:g.43110174G>A	NM_007294.4:c.135-3641C>T	?	benign
17	43093101	G	GT	BRCA1	NC_000017.11:g.43093102dup	NM_007294.4:c.2429dup	N810Kfs*13	pathogenic
17	43094306	CT	C	BRCA1	NC_000017.11:g.43094307del	NM_007294.4:c.1224del	V409*	pathogenic
17	43094159	CT	C	BRCA1	NC_000017.11:g.43094160del	NM_007294.4:c.1371del	D458Tfs*17	pathogenic
17	43114980	C	T	BRCA1	NC_000017.11:g.43114980C>T	NM_007294.4:c.134+746G>A	?	benign
17	43071204	G	GA	BRCA1	NC_000017.11:g.43071205dup	NM_007294.4:c.4709dup	F1571Lfs*3	pathogenic
17	43063942	A	AC	BRCA1	NC_000017.11:g.43063942_43063943insC	NM_007294.4:c.5083_5084insG	F1695Cfs*4	pathogenic
17	43094066	C	A	BRCA1	NC_000017.11:g.43094066C>A	NM_007294.4:c.1465G>T	E489*	pathogenic
17	43093492	T	TGG	BRCA1	NC_000017.11:g.43093492_43093493insGG	NM_007294.4:c.2038_2039insCC	K680Tfs*22	pathogenic
17	43091790	AACGGTGCTATGCCTAGTAG	A	BRCA1	NC_000017.11:g.43091791_43091809del	NM_007294.4:c.3722_3740del	S1241Lfs*17	pathogenic
17	43092422	TA	T	BRCA1	NC_000017.11:g.43092423del	NM_007294.4:c.3108del	F1036Lfs*12	pathogenic
17	43113938	G	A	BRCA1	NC_000017.11:g.43113938G>A	NM_007294.4:c.134+1788C>T	?	benign
17	43063933	TCA	T	BRCA1	NC_000017.11:g.43063934_43063935del	NM_007294.4:c.5091_5092del	C1697*	pathogenic
17	43094652	A	C	BRCA1	NC_000017.11:g.43094652A>C	NM_007294.4:c.879T>G	T293=	likely_benign
17	43094534	T	C	BRCA1	NC_000017.11:g.43094534T>C	NM_007294.4:c.997A>G	T333A	benign
17	43090063	AG	A	BRCA1	NC_000017.11:g.43090064del	NM_007294.4:c.4185+880del	?	benign
17	43094096	CA	C	BRCA1	NC_000017.11:g.43094097del	NM_007294.4:c.1434del	E479Kfs*3	pathogenic
17	43090973	A	ATAGCCCTGAG	BRCA1	NC_000017.11:g.43090974_43090983dup	NM_007294.4:c.4146_4155dup	S1386Lfs*8	pathogenic
17	43093514	C	A	BRCA1	NC_000017.11:g.43093514C>A	NM_007294.4:c.2017G>T	E673*	pathogenic
17	43092414	GGCT	TC	BRCA1	NC_000017.11:g.43092414_43092417delinsTC	NM_007294.4:c.3114_3117delinsGA	A1039Kfs*6	pathogenic
17	43045764	C	A	BRCA1	NC_000017.11:g.43045764C>A	NM_007294.4:c.5506G>T	E1836*	pathogenic
17	43093327	AG	A	BRCA1	NC_000017.11:g.43093328del	NM_007294.4:c.2203del	L735*	pathogenic
17	43109546	A	T	BRCA1	NC_000017.11:g.43109546A>T	NM_007294.4:c.135-3013T>A	?	benign
17	43047665	C	T	BRCA1	NC_000017.11:g.43047665C>T	NM_007294.4:c.5445G>A	W1815*	pathogenic
17	43116981	A	T	BRCA1	NC_000017.11:g.43116981A>T	NM_007294.4:c.81-1202T>A	?	benign
17	43056866	A	G	BRCA1	NC_000017.11:g.43056866A>G	NM_007294.4:c.5277+186T>C	?	benign
17	43099807	TG	T	BRCA1	NC_000017.11:g.43099808del	NM_007294.4:c.514del	Q172Nfs*62	pathogenic
17	43094390	T	A	BRCA1	NC_000017.11:g.43094390T>A	NM_007294.4:c.1141A>T	K381*	pathogenic
17	43093650	G	GAACT	BRCA1	NC_000017.11:g.43093650_43093651insAACT	NM_007294.4:c.1880_1881insAGTT	S628Vfs*3	pathogenic
17	43104146	C	CT	BRCA1	NC_000017.11:g.43104147dup	NM_007294.4:c.416dup	S140Efs*2	pathogenic
17	43094021	GCTTTAATTTATTT	G	BRCA1	NC_000017.11:g.43094022_43094034del	NM_007294.4:c.1497_1509del	N500Vfs*28	pathogenic
17	43094736	A	G	BRCA1	NC_000017.11:g.43094736A>G	NM_007294.4:c.795T>C	S265=	benign
17	43104241	CA	C	BRCA1	NC_000017.11:g.43104242del	NM_007294.4:c.321del	F107Lfs*12	pathogenic
17	43124031	TA	T	BRCA1	NC_000017.11:g.43124032del	NM_007294.4:c.65del	L22*	pathogenic
17	43057061	C	CG	BRCA1	NC_000017.11:g.43057061_43057062insG	NM_007294.4:c.5267_5268insC	Q1756Hfs*74	pathogenic
17	43092852	C	CT	BRCA1	NC_000017.11:g.43092853dup	NM_007294.4:c.2678dup	K894Efs*9	pathogenic
17	43094645	T	A	BRCA1	NC_000017.11:g.43094645T>A	NM_007294.4:c.886A>T	R296*	pathogenic
17	43093585	TCTTCACTG	T	BRCA1	NC_000017.11:g.43093586_43093593del	NM_007294.4:c.1938_1945del	S646Rfs*24	pathogenic
17	43074440	G	T	BRCA1	NC_000017.11:g.43074440G>T	NM_007294.4:c.4566C>A	Y1522*	pathogenic
17	43093768	CTTAT	C	BRCA1	NC_000017.11:g.43093769_43093772del	NM_007294.4:c.1759_1762del	I587Afs*4	pathogenic
17	43091596	G	GTGTT	BRCA1	NC_000017.11:g.43091597_43091600dup	NM_007294.4:c.3931_3934dup	T1312Kfs*19	pathogenic
17	43052883	T	G	BRCA1	NC_000017.11:g.43052883T>G	NM_007294.4:c.5278-1766A>C	?	benign
17	43094786	TG	T	BRCA1	NC_000017.11:g.43094787del	NM_007294.4:c.744del	T249Lfs*49	pathogenic
17	43092870	G	GT	BRCA1	NC_000017.11:g.43092870_43092871insT	NM_007294.4:c.2660_2661insA	H888Pfs*15	pathogenic
17	43093169	CT	C	BRCA1	NC_000017.11:g.43093170del	NM_007294.4:c.2361del	V788Lfs*4	pathogenic
17	43082555	AT	A	BRCA1	NC_000017.11:g.43082556del	NM_007294.4:c.4205del	H1402Lfs*3	pathogenic
17	43091787	AGCAACGGTGCTAT	A	BRCA1	NC_000017.11:g.43091788_43091800del	NM_007294.4:c.3731_3743del	H1244Lfs*16	pathogenic
17	43106453	T	C	BRCA1	NC_000017.11:g.43106453T>C	NM_007294.4:c.212+3A>G	?	pathogenic
17	43082422	G	GTTCT	BRCA1	NC_000017.11:g.43082423_43082426dup	NM_007294.4:c.4335_4338dup	Q1447Rfs*16	pathogenic
17	43112322	G	A	BRCA1	NC_000017.11:g.43112322G>A	NM_007294.4:c.134+3404C>T	?	benign
17	43090999	CTTGT	C	BRCA1	NC_000017.11:g.43091000_43091003del	NM_007294.4:c.4126_4129del	T1376Afs*16	pathogenic
17	43093143	T	TG	BRCA1	NC_000017.11:g.43093144dup	NM_007294.4:c.2387dup	E797Rfs*4	pathogenic
17	43086109	T	TACACAC	BRCA1	NC_000017.11:g.43086110_43086115dup	NM_007294.4:c.4186-3540_4186-3535dup	-	benign
17	43094772	T	A	BRCA1	NC_000017.11:g.43094772T>A	NM_007294.4:c.759A>T	A253=	likely_benign
17	43092150	A	G	BRCA1	NC_000017.11:g.43092150A>G	NM_007294.4:c.3381T>C	Y1127=	likely_benign
17	43056288	C	T	BRCA1	NC_000017.11:g.43056288C>T	NM_007294.4:c.5277+764G>A	?	benign
17	43094231	T	TG	BRCA1	NC_000017.11:g.43094232dup	NM_007294.4:c.1299dup	S434Qfs*2	pathogenic
17	43092183	T	C	BRCA1	NC_000017.11:g.43092183T>C	NM_007294.4:c.3348A>G	V1116=	likely_benign
17	43124032	A	T	BRCA1	NC_000017.11:g.43124032A>T	NM_007294.4:c.65T>A	L22*	pathogenic
17	43076025	G	A	BRCA1	NC_000017.11:g.43076025G>A	NM_007294.4:c.4484+463C>T	?	benign
17	43057055	T	C	BRCA1	NC_000017.11:g.43057055T>C	NM_007294.4:c.5274A>G	R1758=	likely_benign
17	43094319	T	TAG	BRCA1	NC_000017.11:g.43094319_43094320insAG	NM_007294.4:c.1211_1212insCT	E404Dfs*7	pathogenic
17	43063873	C	A	BRCA1	NC_000017.11:g.43063873C>A	NM_007294.4:c.5152+1G>T	?	pathogenic
17	43049088	T	A	BRCA1	NC_000017.11:g.43049088T>A	NM_007294.4:c.5406+33A>T	?	benign
17	43091558	TC	T	BRCA1	NC_000017.11:g.43091559del	NM_007294.4:c.3972del	M1324Ifs*12	pathogenic
17	43093624	CA	C	BRCA1	NC_000017.11:g.43093625del	NM_007294.4:c.1906del	C636Vfs*15	pathogenic
17	43091938	A	T	BRCA1	NC_000017.11:g.43091938A>T	NM_007294.4:c.3593T>A	L1198*	pathogenic
17	43071007	TTC	T	BRCA1	NC_000017.11:g.43071008_43071009del	NM_007294.4:c.4905_4906del	K1636Afs*42	pathogenic
17	43094316	T	C	BRCA1	NC_000017.11:g.43094316T>C	NM_007294.4:c.1215A>G	S405=	likely_benign
17	43093337	C	TT	BRCA1	NC_000017.11:g.43093337delinsTT	NM_007294.4:c.2194delinsAA	E732Kfs*8	pathogenic
17	43103254	G	A	BRCA1	NC_000017.11:g.43103254G>A	NM_007294.4:c.441+868C>T	?	benign
17	43058314	C	A	BRCA1	NC_000017.11:g.43058314C>A	NM_007294.4:c.5194-1179G>T	?	benign
17	43047699	A	T	BRCA1	NC_000017.11:g.43047699A>T	NM_007294.4:c.5411T>A	V1804D	benign
17	43053704	G	A	BRCA1	NC_000017.11:g.43053704G>A	NM_007294.4:c.5278-2587C>T	?	benign
17	43106523	GC	G	BRCA1	NC_000017.11:g.43106524del	NM_007294.4:c.144del	M48Ifs*2	pathogenic
17	43093773	AG	A	BRCA1	NC_000017.11:g.43093774del	NM_007294.4:c.1757del	P586Lfs*2	pathogenic
17	43057052	CT	C	BRCA1	NC_000017.11:g.43057053del	NM_007294.4:c.5276del	K1759Rfs*6	pathogenic
17	43104167	G	T	BRCA1	NC_000017.11:g.43104167G>T	NM_007294.4:c.396C>A	N132K	benign
17	43107299	G	A	BRCA1	NC_000017.11:g.43107299G>A	NM_007294.4:c.135-766C>T	?	benign
17	43102739	A	T	BRCA1	NC_000017.11:g.43102739A>T	NM_007294.4:c.441+1383T>A	?	benign
17	43117163	C	T	BRCA1	NC_000017.11:g.43117163C>T	NM_007294.4:c.81-1384G>A	?	benign
17	43091991	G	A	BRCA1	NC_000017.11:g.43091991G>A	NM_007294.4:c.3540C>T	S1180=	likely_benign
17	43094832	T	C	BRCA1	NC_000017.11:g.43094832T>C	NM_007294.4:c.699A>G	V233=	likely_benign
17	43092836	C	CTT	BRCA1	NC_000017.11:g.43092837_43092838dup	NM_007294.4:c.2693_2694dup	V899Kfs*102	pathogenic
17	43092196	TCTTG	T	BRCA1	NC_000017.11:g.43092197_43092200del	NM_007294.4:c.3331_3334del	Q1111Nfs*5	pathogenic
17	43093097	T	TG	BRCA1	NC_000017.11:g.43093098dup	NM_007294.4:c.2433dup	K812Qfs*11	pathogenic
17	43093552	ACT	A	BRCA1	NC_000017.11:g.43093553_43093554del	NM_007294.4:c.1977_1978del	V660Qfs*12	pathogenic
17	43079318	G	A	BRCA1	NC_000017.11:g.43079318G>A	NM_007294.4:c.4358-2704C>T	?	benign
17	43091762	CTG	C	BRCA1	NC_000017.11:g.43091763_43091764del	NM_007294.4:c.3767_3768del	T1256Rfs*10	pathogenic
17	43092241	C	CT	BRCA1	NC_000017.11:g.43092242dup	NM_007294.4:c.3289dup	S1097Kfs*6	pathogenic
17	43116191	C	CTT	BRCA1	NC_000017.11:g.43116192_43116193dup	NM_007294.4:c.81-414_81-413dup	?	benign
17	43092717	T	C	BRCA1	NC_000017.11:g.43092717T>C	NM_007294.4:c.2814A>G	P938=	benign
17	43106478	A	AT	BRCA1	NC_000017.11:g.43106479dup	NM_007294.4:c.189dup	C64Mfs*2	pathogenic
17	43057356	A	G	BRCA1	NC_000017.11:g.43057356A>G	NM_007294.4:c.5194-221T>C	?	benign
17	43045761	A	G	BRCA1	NC_000017.11:g.43045761A>G	NM_007294.4:c.5509T>C	W1837R	pathogenic
17	43082412	GA	G	BRCA1	NC_000017.11:g.43082413del	NM_007294.4:c.4348del	S1450Qfs*6	pathogenic
17	43094784	AGT	A	BRCA1	NC_000017.11:g.43094785_43094786del	NM_007294.4:c.745_746del	T249*	pathogenic
17	43091450	T	A	BRCA1	NC_000017.11:g.43091450T>A	NM_007294.4:c.4081A>T	M1361L	benign
17	43069161	C	T	BRCA1	NC_000017.11:g.43069161C>T	NM_007294.4:c.4987-1466G>A	?	benign
17	43094237	G	A	BRCA1	NC_000017.11:g.43094237G>A	NM_007294.4:c.1294C>T	L432=	likely_benign
17	43094801	T	TTACTGGGTTGATGATGTTCAGTATTTGTTAC	BRCA1	NC_000017.11:g.43094801_43094802insTACTGGGTTGATGATGTTCAGTATTTGTTAC	NM_007294.4:c.729_730insGTAACAAATACTGAACATCATCAACCCAGTA	N244Vfs*12	pathogenic
17	43063875	GA	G	BRCA1	NC_000017.11:g.43063876del	NM_007294.4:c.5150del	F1717Sfs*3	pathogenic
17	43093385	TG	T	BRCA1	NC_000017.11:g.43093386del	NM_007294.4:c.2145del	S716Vfs*20	pathogenic
17	43093968	T	C	BRCA1	NC_000017.11:g.43093968T>C	NM_007294.4:c.1563A>G	A521=	likely_benign
17	43093405	A	AT	BRCA1	NC_000017.11:g.43093405_43093406insT	NM_007294.4:c.2125_2126insA	F709Yfs*3	pathogenic
17	43102743	C	A	BRCA1	NC_000017.11:g.43102743C>A	NM_007294.4:c.441+1379G>T	?	benign
17	43071114	C	CA	BRCA1	NC_000017.11:g.43071115dup	NM_007294.4:c.4799dup	L1600Ffs*22	pathogenic
17	43093511	GT	G	BRCA1	NC_000017.11:g.43093512del	NM_007294.4:c.2019del	E673Dfs*28	pathogenic
17	43106477	C	CTTTATATCATCCTTACATT	BRCA1	NC_000017.11:g.43106477_43106478insTTTATATCATCCTTACATT	NM_007294.4:c.190_191insAATGTAAGGATGATATAAA	C64*	pathogenic
17	43093896	C	T	BRCA1	NC_000017.11:g.43093896C>T	NM_007294.4:c.1635G>A	V545=	likely_benign
17	43091813	G	A	BRCA1	NC_000017.11:g.43091813G>A	NM_007294.4:c.3718C>T	Q1240*	pathogenic
17	43067387	T	C	BRCA1	NC_000017.11:g.43067387T>C	NM_007294.4:c.5074+221A>G	?	benign
17	43091924	G	A	BRCA1	NC_000017.11:g.43091924G>A	NM_007294.4:c.3607C>T	R1203*	pathogenic
17	43091456	G	A	BRCA1	NC_000017.11:g.43091456G>A	NM_007294.4:c.4075C>T	Q1359*	pathogenic
17	43093800	T	C	BRCA1	NC_000017.11:g.43093800T>C	NM_007294.4:c.1731A>G	E577=	likely_benign
17	43063882	C	T	BRCA1	NC_000017.11:g.43063882C>T	NM_007294.4:c.5144G>A	S1715N	pathogenic
17	43091645	AC	A	BRCA1	NC_000017.11:g.43091646del	NM_007294.4:c.3885del	L1295Ffs*12	pathogenic
17	43094312	C	CT	BRCA1	NC_000017.11:g.43094312_43094313insT	NM_007294.4:c.1218_1219insA	A407Sfs*5	pathogenic
17	43063347	T	A	BRCA1	NC_000017.11:g.43063347T>A	NM_007294.4:c.5179A>T	K1727*	pathogenic
17	43061301	C	T	BRCA1	NC_000017.11:g.43061301C>T	NM_007294.4:c.5193+2032G>A	?	benign
17	43092717	TGG	T	BRCA1	NC_000017.11:g.43092718_43092719del	NM_007294.4:c.2812_2813del	P938Sfs*2	pathogenic
17	43092418	TCTTTAA	T	BRCA1	NC_000017.11:g.43092419_43092424del	NM_007294.4:c.3107_3112del	F1036*	pathogenic
17	43076583	G	T	BRCA1	NC_000017.11:g.43076583G>T	NM_007294.4:c.4389C>A	Y1463*	pathogenic
17	43070934	TTCTGGGGTCAGGCCAG	T	BRCA1	NC_000017.11:g.43070935_43070950del	NM_007294.4:c.4964_4979del	S1655*	pathogenic
17	43110694	G	C	BRCA1	NC_000017.11:g.43110694G>C	NM_007294.4:c.135-4161C>G	?	benign
17	43094239	A	C	BRCA1	NC_000017.11:g.43094239A>C	NM_007294.4:c.1292T>G	L431*	pathogenic
17	43063895	T	A	BRCA1	NC_000017.11:g.43063895T>A	NM_007294.4:c.5131A>T	K1711*	pathogenic
17	43052839	G	A	BRCA1	NC_000017.11:g.43052839G>A	NM_007294.4:c.5278-1722C>T	?	benign
17	43094483	TCTCA	T	BRCA1	NC_000017.11:g.43094484_43094487del	NM_007294.4:c.1044_1047del	C348*	pathogenic
17	43057072	T	C	BRCA1	NC_000017.11:g.43057072T>C	NM_007294.4:c.5257A>G	R1753G	likely_pathogenic
17	43093578	CTTTA	C	BRCA1	NC_000017.11:g.43093579_43093582del	NM_007294.4:c.1949_1952del	I650Rfs*50	pathogenic
17	43099794	C	T	BRCA1	NC_000017.11:g.43099794C>T	NM_007294.4:c.528G>A	T176=	likely_benign
17	43091514	T	TAA	BRCA1	NC_000017.11:g.43091514_43091515insAA	NM_007294.4:c.4016_4017insTT	E1339Dfs*28	pathogenic
17	43115430	G	A	BRCA1	NC_000017.11:g.43115430G>A	NM_007294.4:c.134+296C>T	?	benign
17	43071162	G	A	BRCA1	NC_000017.11:g.43071162G>A	NM_007294.4:c.4752C>T	A1584=	likely_benign
17	43092486	T	G	BRCA1	NC_000017.11:g.43092486T>G	NM_007294.4:c.3045A>C	G1015=	likely_benign
17	43074356	T	C	BRCA1	NC_000017.11:g.43074356T>C	NM_007294.4:c.4650A>G	T1550=	likely_benign
17	43090953	TA	T	BRCA1	NC_000017.11:g.43090954del	NM_007294.4:c.4175del	L1392*	pathogenic
17	43093430	T	A	BRCA1	NC_000017.11:g.43093430T>A	NM_007294.4:c.2101A>T	K701*	pathogenic
17	43092540	ATTTTTCTTACATTTAGT	A	BRCA1	NC_000017.11:g.43092541_43092557del	NM_007294.4:c.2974_2990del	T992Sfs*7	pathogenic
17	43092241	CTT	C	BRCA1	NC_000017.11:g.43092242_43092243del	NM_007294.4:c.3288_3289del	L1098Sfs*4	pathogenic
17	43093880	T	TA	BRCA1	NC_000017.11:g.43093881dup	NM_007294.4:c.1650dup	S551*	pathogenic
17	43092695	TAC	T	BRCA1	NC_000017.11:g.43092696_43092697del	NM_007294.4:c.2834_2835del	S945Nfs*6	pathogenic
17	43092851	T	A	BRCA1	NC_000017.11:g.43092851T>A	NM_007294.4:c.2680A>T	K894*	pathogenic
17	43062192	CAA	C	BRCA1	NC_000017.11:g.43062193_43062194del	NM_007294.4:c.5193+1139_5193+1140del	?	benign
17	43045736	T	TA	BRCA1	NC_000017.11:g.43045737dup	NM_007294.4:c.5533dup	Y1845Lfs*35	pathogenic
17	43094785	G	GT	BRCA1	NC_000017.11:g.43094786dup	NM_007294.4:c.745dup	T249Nfs*2	pathogenic
17	43104889	G	A	BRCA1	NC_000017.11:g.43104889G>A	NM_007294.4:c.280C>T	Q94*	pathogenic
17	43049166	AC	CT	BRCA1	NC_000017.11:g.43049166_43049167delinsCT	NM_007294.4:c.5360_5361delinsAG	C1787*	pathogenic
17	43092887	AT	A	BRCA1	NC_000017.11:g.43092888del	NM_007294.4:c.2643del	E881Dfs*12	pathogenic
17	43093003	GT	G	BRCA1	NC_000017.11:g.43093004del	NM_007294.4:c.2527del	T843Qfs*3	pathogenic
17	43091443	G	C	BRCA1	NC_000017.11:g.43091443G>C	NM_007294.4:c.4088C>G	S1363*	pathogenic
17	43102157	A	G	BRCA1	NC_000017.11:g.43102157A>G	NM_007294.4:c.441+1965T>C	?	benign
17	43104920	A	G	BRCA1	NC_000017.11:g.43104920A>G	NM_007294.4:c.249T>C	V83=	likely_benign
17	43076554	GA	G	BRCA1	NC_000017.11:g.43076555del	NM_007294.4:c.4417del	S1473Lfs*32	pathogenic
17	43104176	GC	G	BRCA1	NC_000017.11:g.43104177del	NM_007294.4:c.386del	G129Afs*34	pathogenic
17	43107458	A	G	BRCA1	NC_000017.11:g.43107458A>G	NM_007294.4:c.135-925T>C	?	benign
17	43091950	G	GA	BRCA1	NC_000017.11:g.43091950_43091951insA	NM_007294.4:c.3580_3581insT	T1194Ifs*25	pathogenic
17	43094151	TA	T	BRCA1	NC_000017.11:g.43094152del	NM_007294.4:c.1379del	I460Nfs*15	pathogenic
17	43101650	G	C	BRCA1	NC_000017.11:g.43101650G>C	NM_007294.4:c.442-1770C>G	?	benign
17	43093907	T	TC	BRCA1	NC_000017.11:g.43093908dup	NM_007294.4:c.1623dup	N542Efs*9	pathogenic
17	43045739	A	C	BRCA1	NC_000017.11:g.43045739A>C	NM_007294.4:c.5531T>G	L1844R	benign
17	43091858	AG	A	BRCA1	NC_000017.11:g.43091859del	NM_007294.4:c.3672del	C1225Afs*10	pathogenic
17	43093037	G	GAC	BRCA1	NC_000017.11:g.43093037_43093038insAC	NM_007294.4:c.2493_2494insGT	P832Vfs*15	pathogenic
17	43093082	CATGA	C	BRCA1	NC_000017.11:g.43093083_43093086del	NM_007294.4:c.2445_2448del	I815Mfs*30	pathogenic
17	43094742	A	G	BRCA1	NC_000017.11:g.43094742A>G	NM_007294.4:c.789T>C	G263=	likely_benign
17	43063369	C	A	BRCA1	NC_000017.11:g.43063369C>A	NM_007294.4:c.5157G>T	V1719=	likely_benign
17	43099855	A	AG	BRCA1	NC_000017.11:g.43099856dup	NM_007294.4:c.466dup	L156Pfs*3	pathogenic
17	43124022	G	A	BRCA1	NC_000017.11:g.43124022G>A	NM_007294.4:c.75C>T	P25=	likely_benign
17	43104148	G	A	BRCA1	NC_000017.11:g.43104148G>A	NM_007294.4:c.415C>T	Q139*	pathogenic
17	43078319	A	G	BRCA1	NC_000017.11:g.43078319A>G	NM_007294.4:c.4358-1705T>C	?	benign
17	43067657	A	G	BRCA1	NC_000017.11:g.43067657A>G	NM_007294.4:c.5025T>C	T1675=	likely_benign
17	43115737	GT	G	BRCA1	NC_000017.11:g.43115738del	NM_007294.4:c.122del	H41Pfs*9	pathogenic
17	43104939	G	AACAAGTTGAC	BRCA1	NC_000017.11:g.43104939delinsAACAAGTTGAC	NM_007294.4:c.230delinsGTCAACTTGTT	T77Sfs*7	pathogenic
17	43094832	TAC	T	BRCA1	NC_000017.11:g.43094833_43094834del	NM_007294.4:c.697_698del	V233Nfs*4	pathogenic
17	43076582	GGTATTCACTACTTTTCT	G	BRCA1	NC_000017.11:g.43076583_43076599del	NM_007294.4:c.4373_4389del	Q1458Pfs*12	pathogenic
17	43091679	G	A	BRCA1	NC_000017.11:g.43091679G>A	NM_007294.4:c.3852C>T	H1284=	likely_benign
17	43093276	A	T	BRCA1	NC_000017.11:g.43093276A>T	NM_007294.4:c.2255T>A	L752*	pathogenic
17	43093220	A	G	BRCA1	NC_000017.11:g.43093220A>G	NM_007294.4:c.2311T>C	L771=	benign
17	43092320	C	CT	BRCA1	NC_000017.11:g.43092321dup	NM_007294.4:c.3210dup	E1071Rfs*4	pathogenic
17	43099835	TCA	T	BRCA1	NC_000017.11:g.43099836_43099837del	NM_007294.4:c.485_486del	V162Efs*19	pathogenic
17	43104173	G	C	BRCA1	NC_000017.11:g.43104173G>C	NM_007294.4:c.390C>G	Y130*	pathogenic
17	43093419	ATT	A	BRCA1	NC_000017.11:g.43093420_43093421del	NM_007294.4:c.2110_2111del	N704Cfs*7	pathogenic
17	43094022	CTTTAA	C	BRCA1	NC_000017.11:g.43094023_43094027del	NM_007294.4:c.1504_1508del	L502Afs*2	pathogenic
17	43094315	TTGATTCAGACTCCCCATCATGTGAGTCATCAGAACCTAACA	T	BRCA1	NC_000017.11:g.43094316_43094356del	NM_007294.4:c.1175_1215del	L392Qfs*6	pathogenic
17	43093331	TC	T	BRCA1	NC_000017.11:g.43093332del	NM_007294.4:c.2199del	K734Nfs*2	pathogenic
17	43045705	TATCAGGTAGGTGTCCAGCTCCTGGCACTGGTAGAGTGCTACACTGTCCAACACCCACTCTCG	T	BRCA1	NC_000017.11:g.43045706_43045767del	NM_007294.4:c.5503_5564del	R1835Tfs*24	pathogenic
17	43091459	C	A	BRCA1	NC_000017.11:g.43091459C>A	NM_007294.4:c.4072G>T	E1358*	pathogenic
17	43092505	G	T	BRCA1	NC_000017.11:g.43092505G>T	NM_007294.4:c.3026C>A	S1009*	pathogenic
17	43092734	CA	C	BRCA1	NC_000017.11:g.43092735del	NM_007294.4:c.2796del	G933Vfs*67	pathogenic
17	43099491	G	A	BRCA1	NC_000017.11:g.43099491G>A	NM_007294.4:c.547+284C>T	?	benign
17	43094025	TA	T	BRCA1	NC_000017.11:g.43094026del	NM_007294.4:c.1505del	L502*	pathogenic
17	43102948	C	CT	BRCA1	NC_000017.11:g.43102949dup	NM_007294.4:c.441+1173dup	?	benign
17	43091690	GAGAT	G	BRCA1	NC_000017.11:g.43091691_43091694del	NM_007294.4:c.3837_3840del	S1280Rfs*26	pathogenic
17	43066450	C	T	BRCA1	NC_000017.11:g.43066450C>T	NM_007294.4:c.5074+1158G>A	?	benign
17	43092596	GA	G	BRCA1	NC_000017.11:g.43092597del	NM_007294.4:c.2934del	R979Vfs*21	pathogenic
17	43092342	GG	C	BRCA1	NC_000017.11:g.43092342_43092343delinsC	NM_007294.4:c.3188_3189delinsG	S1063*	pathogenic
17	43092860	AC	A	BRCA1	NC_000017.11:g.43092861del	NM_007294.4:c.2670del	S891Pfs*2	pathogenic
17	43066690	C	G	BRCA1	NC_000017.11:g.43066690C>G	NM_007294.4:c.5074+918G>C	?	benign
17	43093871	C	A	BRCA1	NC_000017.11:g.43093871C>A	NM_007294.4:c.1660G>T	E554*	pathogenic
17	43070929	A	G	BRCA1	NC_000017.11:g.43070929A>G	NM_007294.4:c.4985T>C	F1662S	benign
17	43093694	T	TC	BRCA1	NC_000017.11:g.43093695dup	NM_007294.4:c.1836dup	R613Efs*12	pathogenic
17	43091560	ATT	A	BRCA1	NC_000017.11:g.43091561_43091562del	NM_007294.4:c.3969_3970del	Q1323Hfs*6	pathogenic
17	43092666	T	C	BRCA1	NC_000017.11:g.43092666T>C	NM_007294.4:c.2865A>G	S955=	likely_benign
17	43045759	C	T	BRCA1	NC_000017.11:g.43045759C>T	NM_007294.4:c.5511G>A	W1837*	pathogenic
17	43093731	GA	G	BRCA1	NC_000017.11:g.43093732del	NM_007294.4:c.1799del	I600Tfs*12	pathogenic
17	43092135	GT	G	BRCA1	NC_000017.11:g.43092136del	NM_007294.4:c.3395del	N1132Tfs*2	pathogenic
17	43094795	A	C	BRCA1	NC_000017.11:g.43094795A>C	NM_007294.4:c.736T>G	L246V	benign
17	43068271	C	T	BRCA1	NC_000017.11:g.43068271C>T	NM_007294.4:c.4987-576G>A	?	benign
17	43093817	C	A	BRCA1	NC_000017.11:g.43093817C>A	NM_007294.4:c.1714G>T	E572*	pathogenic
17	43094093	TTTCAGTTACA	T	BRCA1	NC_000017.11:g.43094094_43094103del	NM_007294.4:c.1428_1437del	H476Qfs*3	pathogenic
17	43104262	C	G	BRCA1	NC_000017.11:g.43104262C>G	NM_007294.4:c.302-1G>C	?	pathogenic
17	43066598	A	C	BRCA1	NC_000017.11:g.43066598A>C	NM_007294.4:c.5074+1010T>G	?	benign
17	43091594	G	A	BRCA1	NC_000017.11:g.43091594G>A	NM_007294.4:c.3937C>T	Q1313*	pathogenic
17	43057073	T	G	BRCA1	NC_000017.11:g.43057073T>G	NM_007294.4:c.5256A>C	A1752=	likely_benign
17	43110340	A	G	BRCA1	NC_000017.11:g.43110340A>G	NM_007294.4:c.135-3807T>C	?	benign
17	43093786	GT	G	BRCA1	NC_000017.11:g.43093787del	NM_007294.4:c.1744del	T582Rfs*6	pathogenic
17	43092241	CT	C	BRCA1	NC_000017.11:g.43092242del	NM_007294.4:c.3289del	S1097Vfs*12	pathogenic
17	43099876	TC	T	BRCA1	NC_000017.11:g.43099877del	NM_007294.4:c.445del	E149Kfs*14	pathogenic
17	43093215	T	G	BRCA1	NC_000017.11:g.43093215T>G	NM_007294.4:c.2316A>C	V772=	likely_benign
17	43094460	T	C	BRCA1	NC_000017.11:g.43094460T>C	NM_007294.4:c.1071A>G	K357=	likely_benign
17	43093577	TC	T	BRCA1	NC_000017.11:g.43093578del	NM_007294.4:c.1953del	K654Sfs*47	pathogenic
17	43093368	A	AC	BRCA1	NC_000017.11:g.43093368_43093369insC	NM_007294.4:c.2162_2163insG	F721Lfs*5	pathogenic
17	43094112	G	A	BRCA1	NC_000017.11:g.43094112G>A	NM_007294.4:c.1419C>T	N473=	likely_benign
17	43094640	C	A	BRCA1	NC_000017.11:g.43094640C>A	NM_007294.4:c.891G>T	M297I	benign
17	43092770	GT	G	BRCA1	NC_000017.11:g.43092771del	NM_007294.4:c.2760del	Q921Rfs*79	pathogenic
17	43067630	A	G	BRCA1	NC_000017.11:g.43067630A>G	NM_007294.4:c.5052T>C	T1684=	likely_benign
17	43114094	G	T	BRCA1	NC_000017.11:g.43114094G>T	NM_007294.4:c.134+1632C>A	?	benign
17	43092080	C	CA	BRCA1	NC_000017.11:g.43092081dup	NM_007294.4:c.3450dup	D1151*	pathogenic
17	43078088	CT	C	BRCA1	NC_000017.11:g.43078089del	NM_007294.4:c.4358-1475del	?	benign
17	43094799	AT	A	BRCA1	NC_000017.11:g.43094800del	NM_007294.4:c.731del	N244Mfs*3	pathogenic
17	43093452	G	A	BRCA1	NC_000017.11:g.43093452G>A	NM_007294.4:c.2079C>T	D693=	likely_benign
17	43069579	C	A	BRCA1	NC_000017.11:g.43069579C>A	NM_007294.4:c.4986+1349G>T	?	benign
17	43090922	CACACACACACACGCTTTTTA	T	BRCA1	NC_000017.11:g.43090922_43090942delinsT	NM_007294.4:c.4185+2_4185+22delinsA	?	pathogenic
17	43067607	C	A	BRCA1	NC_000017.11:g.43067607C>A	NM_007294.4:c.5074+1G>T	?	pathogenic
17	43094648	CT	C	BRCA1	NC_000017.11:g.43094649del	NM_007294.4:c.882del	D295Tfs*3	pathogenic
17	43091659	C	CG	BRCA1	NC_000017.11:g.43091659_43091660insG	NM_007294.4:c.3871_3872insC	C1291Sfs*4	pathogenic
17	43063902	CG	C	BRCA1	NC_000017.11:g.43063903del	NM_007294.4:c.5123del	A1708Gfs*6	pathogenic
17	43104124	A	G	BRCA1	NC_000017.11:g.43104124A>G	NM_007294.4:c.439T>C	L147=	likely_benign
17	43091981	CT	A	BRCA1	NC_000017.11:g.43091981_43091982delinsA	NM_007294.4:c.3549_3550delinsT	K1183Nfs*27	pathogenic
17	43093699	AG	A	BRCA1	NC_000017.11:g.43093700del	NM_007294.4:c.1831del	L611*	pathogenic
17	43093049	CT	C	BRCA1	NC_000017.11:g.43093050del	NM_007294.4:c.2481del	G828Afs*18	pathogenic
17	43094298	A	C	BRCA1	NC_000017.11:g.43094298A>C	NM_007294.4:c.1233T>G	D411E	benign
17	43071063	A	G	BRCA1	NC_000017.11:g.43071063A>G	NM_007294.4:c.4851T>C	A1617=	likely_benign
17	43079885	G	A	BRCA1	NC_000017.11:g.43079885G>A	NM_007294.4:c.4357+2519C>T	?	benign
17	43093119	CTGACTCACACATTT	C	BRCA1	NC_000017.11:g.43093120_43093133del	NM_007294.4:c.2398_2411del	K800Vfs*5	pathogenic
17	43091709	T	TA	BRCA1	NC_000017.11:g.43091710dup	NM_007294.4:c.3821dup	I1275Nfs*12	pathogenic
17	43088898	A	G	BRCA1	NC_000017.11:g.43088898A>G	NM_007294.4:c.4185+2046T>C	?	benign
17	43094528	TG	T	BRCA1	NC_000017.11:g.43094529del	NM_007294.4:c.1002del	S335Afs*6	pathogenic
17	43094625	A	AG	BRCA1	NC_000017.11:g.43094626dup	NM_007294.4:c.905dup	E303*	pathogenic
17	43074430	CTT	C	BRCA1	NC_000017.11:g.43074431_43074432del	NM_007294.4:c.4574_4575del	Q1525Rfs*5	pathogenic
17	43045714	G	C	BRCA1	NC_000017.11:g.43045714G>C	NM_007294.4:c.5556C>G	T1852=	likely_benign
17	43044804	CT	C	BRCA1	NC_000017.11:g.43044805del	NM_007294.4:c.*873del	?	benign
17	43112736	C	T	BRCA1	NC_000017.11:g.43112736C>T	NM_007294.4:c.134+2990G>A	?	benign
17	43118260	C	T	BRCA1	NC_000017.11:g.43118260C>T	NM_007294.4:c.81-2481G>A	?	benign
17	43085936	G	A	BRCA1	NC_000017.11:g.43085936G>A	NM_007294.4:c.4186-3361C>T	?	benign
17	43092279	AAGCAT	A	BRCA1	NC_000017.11:g.43092280_43092284del	NM_007294.4:c.3247_3251del	M1083*	pathogenic
17	43071028	T	TC	BRCA1	NC_000017.11:g.43071029dup	NM_007294.4:c.4885dup	E1629Gfs*50	pathogenic
17	43060788	C	T	BRCA1	NC_000017.11:g.43060788C>T	NM_007294.4:c.5193+2545G>A	?	benign
17	43045761	A	C	BRCA1	NC_000017.11:g.43045761A>C	NM_007294.4:c.5509T>G	W1837G	pathogenic
17	43063366	G	C	BRCA1	NC_000017.11:g.43063366G>C	NM_007294.4:c.5160C>G	T1720=	likely_benign
17	43082494	TC	T	BRCA1	NC_000017.11:g.43082495del	NM_007294.4:c.4266del	S1423Afs*11	pathogenic
17	43107539	C	T	BRCA1	NC_000017.11:g.43107539C>T	NM_007294.4:c.135-1006G>A	?	benign
17	43071076	CT	C	BRCA1	NC_000017.11:g.43071077del	NM_007294.4:c.4837del	S1613Vfs*20	pathogenic
17	43097273	T	C	BRCA1	NC_000017.11:g.43097273T>C	NM_007294.4:c.564A>G	E188=	likely_benign
17	43092398	TA	T	BRCA1	NC_000017.11:g.43092399del	NM_007294.4:c.3132del	N1045Mfs*3	pathogenic
17	43067640	G	GTAAT	BRCA1	NC_000017.11:g.43067641_43067644dup	NM_007294.4:c.5038_5041dup	T1681Nfs*3	pathogenic
17	43082434	G	C	BRCA1	NC_000017.11:g.43082434G>C	NM_007294.4:c.4327C>G	R1443G	benign
17	43091669	C	A	BRCA1	NC_000017.11:g.43091669C>A	NM_007294.4:c.3862G>T	E1288*	pathogenic
17	43092876	G	GA	BRCA1	NC_000017.11:g.43092877dup	NM_007294.4:c.2654dup	S886Lfs*17	pathogenic
17	43091443	G	T	BRCA1	NC_000017.11:g.43091443G>T	NM_007294.4:c.4088C>A	S1363*	pathogenic
17	43091005	TCA	T	BRCA1	NC_000017.11:g.43091006_43091007del	NM_007294.4:c.4122_4123del	S1374Rfs*6	pathogenic
17	43104166	G	A	BRCA1	NC_000017.11:g.43104166G>A	NM_007294.4:c.397C>T	R133C	benign
17	43093910	G	A	BRCA1	NC_000017.11:g.43093910G>A	NM_007294.4:c.1621C>T	Q541*	pathogenic
17	43102113	C	T	BRCA1	NC_000017.11:g.43102113C>T	NM_007294.4:c.441+2009G>A	?	benign
17	43091912	T	A	BRCA1	NC_000017.11:g.43091912T>A	NM_007294.4:c.3619A>T	K1207*	pathogenic
17	43091491	CTT	C	BRCA1	NC_000017.11:g.43091492_43091493del	NM_007294.4:c.4038_4039del	G1348Nfs*7	pathogenic
17	43094838	C	T	BRCA1	NC_000017.11:g.43094838C>T	NM_007294.4:c.693G>A	T231=	likely_benign
17	43046253	G	A	BRCA1	NC_000017.11:g.43046253G>A	NM_007294.4:c.5468-451C>T	?	benign
17	43074394	G	A	BRCA1	NC_000017.11:g.43074394G>A	NM_007294.4:c.4612C>T	Q1538*	pathogenic
17	43124023	GGA	G	BRCA1	NC_000017.11:g.43124024_43124025del	NM_007294.4:c.72_73del	P25Hfs*15	pathogenic
17	43094570	ATC	A	BRCA1	NC_000017.11:g.43094571_43094572del	NM_007294.4:c.959_960del	R320Mfs*5	pathogenic
17	43091996	TG	T	BRCA1	NC_000017.11:g.43091997del	NM_007294.4:c.3534del	S1178Rfs*32	pathogenic
17	43094264	A	AAT	BRCA1	NC_000017.11:g.43094265_43094266dup	NM_007294.4:c.1265_1266dup	S423Ifs*8	pathogenic
17	43091826	GTTTAC	G	BRCA1	NC_000017.11:g.43091827_43091831del	NM_007294.4:c.3700_3704del	V1234Qfs*8	pathogenic
17	43099835	T	TCA	BRCA1	NC_000017.11:g.43099836_43099837dup	NM_007294.4:c.485_486dup	R163*	pathogenic
17	43076602	G	T	BRCA1	NC_000017.11:g.43076602G>T	NM_007294.4:c.4370C>A	S1457*	pathogenic
17	43094545	T	TG	BRCA1	NC_000017.11:g.43094545_43094546insG	NM_007294.4:c.985_986insC	N329Tfs*2	pathogenic
17	43092507	C	T	BRCA1	NC_000017.11:g.43092507C>T	NM_007294.4:c.3024G>A	M1008I	benign
17	43094409	TG	T	BRCA1	NC_000017.11:g.43094410del	NM_007294.4:c.1121del	T374Nfs*2	pathogenic
17	43093038	ATACT	A	BRCA1	NC_000017.11:g.43093039_43093042del	NM_007294.4:c.2489_2492del	K830Ifs*15	pathogenic
17	43071079	TG	T	BRCA1	NC_000017.11:g.43071080del	NM_007294.4:c.4834del	Q1612Rfs*21	pathogenic
17	43092752	C	CA	BRCA1	NC_000017.11:g.43092753dup	NM_007294.4:c.2778dup	A927Cfs*11	pathogenic
17	43124076	G	GC	BRCA1	NC_000017.11:g.43124077dup	NM_007294.4:c.20dup	V8Rfs*2	pathogenic
17	43091717	T	TA	BRCA1	NC_000017.11:g.43091718dup	NM_007294.4:c.3813dup	N1272*	pathogenic
17	43057119	C	CT	BRCA1	NC_000017.11:g.43057120dup	NM_007294.4:c.5209dup	R1737Kfs*93	pathogenic
17	43052991	C	T	BRCA1	NC_000017.11:g.43052991C>T	NM_007294.4:c.5278-1874G>A	?	benign
17	43094480	TTC	T	BRCA1	NC_000017.11:g.43094481_43094482del	NM_007294.4:c.1049_1050del	R350Kfs*5	pathogenic
17	43093246	CTT	C	BRCA1	NC_000017.11:g.43093247_43093248del	NM_007294.4:c.2283_2284del	R762Ifs*5	pathogenic
17	43094428	T	TG	BRCA1	NC_000017.11:g.43094428_43094429insG	NM_007294.4:c.1102_1103insC	E368Afs*10	pathogenic
17	43094720	C	T	BRCA1	NC_000017.11:g.43094720C>T	NM_007294.4:c.811G>A	V271M	benign
17	43091459	CT	C	BRCA1	NC_000017.11:g.43091460del	NM_007294.4:c.4071del	E1358Sfs*8	pathogenic
17	43082567	A	ACC	BRCA1	NC_000017.11:g.43082567_43082568insCC	NM_007294.4:c.4193_4194insGG	D1398Efs*8	pathogenic
17	43093844	G	A	BRCA1	NC_000017.11:g.43093844G>A	NM_007294.4:c.1687C>T	Q563*	pathogenic
17	43112726	CT	C	BRCA1	NC_000017.11:g.43112727del	NM_007294.4:c.134+2999del	?	benign
17	43092179	G	A	BRCA1	NC_000017.11:g.43092179G>A	NM_007294.4:c.3352C>T	Q1118*	pathogenic
17	43091819	G	GTA	BRCA1	NC_000017.11:g.43091820_43091821dup	NM_007294.4:c.3710_3711dup	P1238Yfs*27	pathogenic
17	43105117	T	C	BRCA1	NC_000017.11:g.43105117T>C	NM_007294.4:c.213-161A>G	?	benign
17	43082451	GA	G	BRCA1	NC_000017.11:g.43082452del	NM_007294.4:c.4309del	S1437Lfs*19	pathogenic
17	43091923	C	T	BRCA1	NC_000017.11:g.43091923C>T	NM_007294.4:c.3608G>A	R1203Q	benign
17	43054039	T	C	BRCA1	NC_000017.11:g.43054039T>C	NM_007294.4:c.5278-2922A>G	?	benign
17	43092486	T	TC	BRCA1	NC_000017.11:g.43092487dup	NM_007294.4:c.3044dup	N1016Kfs*2	pathogenic
17	43099805	GT	G	BRCA1	NC_000017.11:g.43099806del	NM_007294.4:c.516del	Q172Hfs*62	pathogenic
17	43082518	C	A	BRCA1	NC_000017.11:g.43082518C>A	NM_007294.4:c.4243G>T	E1415*	pathogenic
17	43093738	A	C	BRCA1	NC_000017.11:g.43093738A>C	NM_007294.4:c.1793T>G	L598*	pathogenic
17	43092242	T	TTTGTTTATAGACCTCAGGTTGCAAAACCCCTAATCTAAGCATAGCA	BRCA1	NC_000017.11:g.43092243_43092288dup	NM_007294.4:c.3243_3288dup	S1097Cfs*4	pathogenic
17	43099814	G	A	BRCA1	NC_000017.11:g.43099814G>A	NM_007294.4:c.508C>T	R170W	benign
17	43073822	T	C	BRCA1	NC_000017.11:g.43073822T>C	NM_007294.4:c.4675+509A>G	?	benign
17	43092326	GA	G	BRCA1	NC_000017.11:g.43092327del	NM_007294.4:c.3204del	Q1069Kfs*4	pathogenic
17	43091752	A	AT	BRCA1	NC_000017.11:g.43091752_43091753insT	NM_007294.4:c.3778_3779insA	L1260Yfs*7	pathogenic
17	43047106	T	C	BRCA1	NC_000017.11:g.43047106T>C	NM_007294.4:c.5467+537A>G	?	benign
17	43124331	T	C	BRCA1	NC_000017.11:g.43124331T>C	NM_007294.4:c.-19-216A>G	?	benign
17	43111549	T	C	BRCA1	NC_000017.11:g.43111549T>C	NM_007294.4:c.134+4177A>G	?	benign
17	43106484	GAC	G	BRCA1	NC_000017.11:g.43106485_43106486del	NM_007294.4:c.182_183del	C61Sfs*4	pathogenic
17	43093187	TTTCC	T	BRCA1	NC_000017.11:g.43093188_43093191del	NM_007294.4:c.2340_2343del	E781Vfs*10	pathogenic
17	43117726	T	C	BRCA1	NC_000017.11:g.43117726T>C	NM_007294.4:c.81-1947A>G	?	benign
17	43094655	GA	G	BRCA1	NC_000017.11:g.43094656del	NM_007294.4:c.875del	L292Pfs*6	pathogenic
17	43091708	T	C	BRCA1	NC_000017.11:g.43091708T>C	NM_007294.4:c.3823A>G	I1275V	benign
17	43091773	GAC	G	BRCA1	NC_000017.11:g.43091774_43091775del	NM_007294.4:c.3756_3757del	S1253*	pathogenic
17	43080681	C	T	BRCA1	NC_000017.11:g.43080681C>T	NM_007294.4:c.4357+1723G>A	?	benign
17	43093560	T	C	BRCA1	NC_000017.11:g.43093560T>C	NM_007294.4:c.1971A>G	Q657=	benign
17	43094211	TA	T	BRCA1	NC_000017.11:g.43094212del	NM_007294.4:c.1319del	L440*	pathogenic
17	43092906	T	C	BRCA1	NC_000017.11:g.43092906T>C	NM_007294.4:c.2625A>G	P875=	likely_benign
17	43067654	TAA	T	BRCA1	NC_000017.11:g.43067655_43067656del	NM_007294.4:c.5026_5027del	L1676Nfs*2	pathogenic
17	43106456	C	CT	BRCA1	NC_000017.11:g.43106457dup	NM_007294.4:c.211dup	R71Kfs*10	pathogenic
17	43094141	TTTT	CTTTC	BRCA1	NC_000017.11:g.43094141_43094144delinsCTTTC	NM_007294.4:c.1387_1390delinsGAAAG	K463Efs*17	pathogenic
17	43116581	C	T	BRCA1	NC_000017.11:g.43116581C>T	NM_007294.4:c.81-802G>A	?	benign
17	43045803	C	T	BRCA1	NC_000017.11:g.43045803C>T	NM_007294.4:c.5468-1G>A	?	pathogenic
17	43091793	G	A	BRCA1	NC_000017.11:g.43091793G>A	NM_007294.4:c.3738C>T	T1246=	likely_benign
17	43124051	TA	T	BRCA1	NC_000017.11:g.43124052del	NM_007294.4:c.45del	N16Mfs*7	pathogenic
17	43097246	G	A	BRCA1	NC_000017.11:g.43097246G>A	NM_007294.4:c.591C>T	C197=	benign
17	43067675	G	A	BRCA1	NC_000017.11:g.43067675G>A	NM_007294.4:c.5007C>T	A1669=	likely_benign
17	43092419	C	A	BRCA1	NC_000017.11:g.43092419C>A	NM_007294.4:c.3112G>T	E1038*	pathogenic
17	43051091	G	A	BRCA1	NC_000017.11:g.43051091G>A	NM_007294.4:c.5304C>T	C1768=	likely_benign
17	43057071	C	CT	BRCA1	NC_000017.11:g.43057072dup	NM_007294.4:c.5257dup	R1753Kfs*77	pathogenic
17	43091700	T	TG	BRCA1	NC_000017.11:g.43091701dup	NM_007294.4:c.3830dup	A1279Gfs*8	pathogenic
17	43091928	ACCCTGAG	A	BRCA1	NC_000017.11:g.43091929_43091935del	NM_007294.4:c.3596_3602del	A1199Vfs*9	pathogenic
17	43092250	TAG	T	BRCA1	NC_000017.11:g.43092251_43092252del	NM_007294.4:c.3279_3280del	Y1094*	pathogenic
17	43091488	CCT	C	BRCA1	NC_000017.11:g.43091489_43091490del	NM_007294.4:c.4041_4042del	G1348Nfs*7	pathogenic
17	43094254	G	T	BRCA1	NC_000017.11:g.43094254G>T	NM_007294.4:c.1277C>A	S426*	pathogenic
17	43047646	G	GA	BRCA1	NC_000017.11:g.43047646_43047647insA	NM_007294.4:c.5463_5464insT	H1822Sfs*8	pathogenic
17	43093376	T	A	BRCA1	NC_000017.11:g.43093376T>A	NM_007294.4:c.2155A>T	K719*	pathogenic
17	43093200	A	T	BRCA1	NC_000017.11:g.43093200A>T	NM_007294.4:c.2331T>A	Y777*	pathogenic
17	43093325	CT	C	BRCA1	NC_000017.11:g.43093326del	NM_007294.4:c.2205del	E736Kfs*17	pathogenic
17	43094549	ATG	A	BRCA1	NC_000017.11:g.43094550_43094551del	NM_007294.4:c.980_981del	T327Mfs*2	pathogenic
17	43067673	C	CG	BRCA1	NC_000017.11:g.43067673_43067674insG	NM_007294.4:c.5008_5009insC	R1670Tfs*9	pathogenic
17	43094176	AC	A	BRCA1	NC_000017.11:g.43094177del	NM_007294.4:c.1354del	V452*	pathogenic
17	43065497	T	C	BRCA1	NC_000017.11:g.43065497T>C	NM_007294.4:c.5075-1546A>G	?	benign
17	43092666	T	A	BRCA1	NC_000017.11:g.43092666T>A	NM_007294.4:c.2865A>T	S955=	likely_benign
17	43106929	T	C	BRCA1	NC_000017.11:g.43106929T>C	NM_007294.4:c.135-396A>G	?	benign
17	43099803	AG	A	BRCA1	NC_000017.11:g.43099804del	NM_007294.4:c.518del	P173Lfs*61	pathogenic
17	43093316	TA	T	BRCA1	NC_000017.11:g.43093317del	NM_007294.4:c.2214del	V740Cfs*13	pathogenic
17	43104144	C	CT	BRCA1	NC_000017.11:g.43104145dup	NM_007294.4:c.418dup	S140Kfs*2	pathogenic
17	43115789	TA	T	BRCA1	NC_000017.11:g.43115790del	NM_007294.4:c.81-11del	?	benign
17	43092756	G	A	BRCA1	NC_000017.11:g.43092756G>A	NM_007294.4:c.2775C>T	I925=	likely_benign
17	43115738	T	C	BRCA1	NC_000017.11:g.43115738T>C	NM_007294.4:c.122A>G	H41R	pathogenic
17	43093180	G	A	BRCA1	NC_000017.11:g.43093180G>A	NM_007294.4:c.2351C>T	S784L	benign
17	43094169	ACT	A	BRCA1	NC_000017.11:g.43094170_43094171del	NM_007294.4:c.1360_1361del	S454*	pathogenic
17	43091852	G	A	BRCA1	NC_000017.11:g.43091852G>A	NM_007294.4:c.3679C>T	Q1227*	pathogenic
17	43091878	CTAGAT	C	BRCA1	NC_000017.11:g.43091879_43091883del	NM_007294.4:c.3648_3652del	S1217*	pathogenic
17	43074410	A	AAG	BRCA1	NC_000017.11:g.43074410_43074411insAG	NM_007294.4:c.4595_4596insCT	D1533Lfs*16	pathogenic
17	43105222	T	C	BRCA1	NC_000017.11:g.43105222T>C	NM_007294.4:c.213-266A>G	?	benign
17	43092743	G	GAAAGCCTGCAGTGATAA	BRCA1	NC_000017.11:g.43092743_43092744insAAAGCCTGCAGTGATAA	NM_007294.4:c.2787_2788insTTATCACTGCAGGCTTT	P930Lfs*76	pathogenic
17	43063373	C	T	BRCA1	NC_000017.11:g.43063373C>T	NM_007294.4:c.5153G>A	W1718*	pathogenic
17	43093856	CT	C	BRCA1	NC_000017.11:g.43093857del	NM_007294.4:c.1674del	G559Vfs*13	pathogenic
17	43092844	CT	C	BRCA1	NC_000017.11:g.43092845del	NM_007294.4:c.2686del	S896Vfs*104	pathogenic
17	43049141	AAAGCTCCTTCACCACAG	A	BRCA1	NC_000017.11:g.43049142_43049158del	NM_007294.4:c.5369_5385del	S1790Ffs*34	pathogenic
17	43092117	TC	T	BRCA1	NC_000017.11:g.43092118del	NM_007294.4:c.3413del	G1138Efs*17	pathogenic
17	43093402	G	GTC	BRCA1	NC_000017.11:g.43093402_43093403insTC	NM_007294.4:c.2128_2129insGA	T710Rfs*27	pathogenic
17	43093222	G	C	BRCA1	NC_000017.11:g.43093222G>C	NM_007294.4:c.2309C>G	S770*	pathogenic
17	43093250	CAGTTTGCAAAACCCTTTCTCCACTTAACATGAGAT	C	BRCA1	NC_000017.11:g.43093251_43093285del	NM_007294.4:c.2246_2280del	D749Gfs*7	pathogenic
17	43051086	C	A	BRCA1	NC_000017.11:g.43051086C>A	NM_007294.4:c.5309G>T	G1770V	pathogenic
17	43104227	A	AT	BRCA1	NC_000017.11:g.43104228dup	NM_007294.4:c.335dup	N112Kfs*2	pathogenic
17	43094113	T	C	BRCA1	NC_000017.11:g.43094113T>C	NM_007294.4:c.1418A>G	N473S	benign
17	43092758	T	G	BRCA1	NC_000017.11:g.43092758T>G	NM_007294.4:c.2773A>C	I925L	benign
17	43104224	GTTAT	G	BRCA1	NC_000017.11:g.43104225_43104228del	NM_007294.4:c.335_338del	N112Tfs*6	pathogenic
17	43092718	GG	C	BRCA1	NC_000017.11:g.43092718_43092719delinsC	NM_007294.4:c.2812_2813delinsG	P938Efs*62	pathogenic
17	43093245	T	A	BRCA1	NC_000017.11:g.43093245T>A	NM_007294.4:c.2286A>T	R762S	benign
17	43094633	CT	C	BRCA1	NC_000017.11:g.43094634del	NM_007294.4:c.897del	E300Kfs*14	pathogenic
17	43094206	CAT	C	BRCA1	NC_000017.11:g.43094207_43094208del	NM_007294.4:c.1323_1324del	I441Mfs*2	pathogenic
17	43046604	A	G	BRCA1	NC_000017.11:g.43046604A>G	NM_007294.4:c.5468-802T>C	?	benign
17	43092374	C	A	BRCA1	NC_000017.11:g.43092374C>A	NM_007294.4:c.3157G>T	E1053*	pathogenic
17	43093532	G	A	BRCA1	NC_000017.11:g.43093532G>A	NM_007294.4:c.1999C>T	Q667*	pathogenic
17	43093953	T	C	BRCA1	NC_000017.11:g.43093953T>C	NM_007294.4:c.1578A>G	Q526=	likely_benign
17	43091879	T	TA	BRCA1	NC_000017.11:g.43091880dup	NM_007294.4:c.3651dup	S1218*	pathogenic
17	43099850	TAG	T	BRCA1	NC_000017.11:g.43099851_43099852del	NM_007294.4:c.470_471del	S157*	pathogenic
17	43091006	C	A	BRCA1	NC_000017.11:g.43091006C>A	NM_007294.4:c.4123G>T	E1375*	pathogenic
17	43051066	T	TG	BRCA1	NC_000017.11:g.43051067dup	NM_007294.4:c.5328dup	T1777Hfs*53	pathogenic
17	43076550	A	G	BRCA1	NC_000017.11:g.43076550A>G	NM_007294.4:c.4422T>C	A1474=	likely_benign
17	43091595	G	A	BRCA1	NC_000017.11:g.43091595G>A	NM_007294.4:c.3936C>T	T1312=	likely_benign
17	43075589	G	A	BRCA1	NC_000017.11:g.43075589G>A	NM_007294.4:c.4484+899C>T	?	benign
17	43071174	A	G	BRCA1	NC_000017.11:g.43071174A>G	NM_007294.4:c.4740T>C	S1580=	likely_benign
17	43091596	GTGTT	G	BRCA1	NC_000017.11:g.43091597_43091600del	NM_007294.4:c.3931_3934del	N1311Pfs*6	pathogenic
17	43092366	GC	G	BRCA1	NC_000017.11:g.43092367del	NM_007294.4:c.3164del	G1055Afs*7	pathogenic
17	43124030	C	CT	BRCA1	NC_000017.11:g.43124031dup	NM_007294.4:c.66dup	E23Rfs*18	pathogenic
17	43093685	A	AC	BRCA1	NC_000017.11:g.43093685_43093686insC	NM_007294.4:c.1845_1846insG	S616Vfs*9	pathogenic
17	43093319	C	CT	BRCA1	NC_000017.11:g.43093320dup	NM_007294.4:c.2211dup	V738Sfs*2	pathogenic
17	43092560	T	A	BRCA1	NC_000017.11:g.43092560T>A	NM_007294.4:c.2971A>T	K991*	pathogenic
17	43067638	C	CATTA	BRCA1	NC_000017.11:g.43067638_43067639insATTA	NM_007294.4:c.5043_5044insTAAT	E1682*	pathogenic
17	43124057	CATTT	C	BRCA1	NC_000017.11:g.43124058_43124061del	NM_007294.4:c.36_39del	N13Sfs*9	pathogenic
17	43093901	G	A	BRCA1	NC_000017.11:g.43093901G>A	NM_007294.4:c.1630C>T	Q544*	pathogenic
17	43092184	ACTT	A	BRCA1	NC_000017.11:g.43092185_43092187del	NM_007294.4:c.3344_3346del	E1115del	benign
17	43093118	ACT	A	BRCA1	NC_000017.11:g.43093119_43093120del	NM_007294.4:c.2411_2412del	Q804Lfs*5	pathogenic
17	43047645	T	TA	BRCA1	NC_000017.11:g.43047645_43047646insA	NM_007294.4:c.5464_5465insT	H1822Lfs*8	pathogenic
17	43093141	TC	T	BRCA1	NC_000017.11:g.43093142del	NM_007294.4:c.2389del	E797Nfs*6	pathogenic
17	43115746	C	T	BRCA1	NC_000017.11:g.43115746C>T	NM_007294.4:c.114G>A	K38=	benign
17	43098566	C	T	BRCA1	NC_000017.11:g.43098566C>T	NM_007294.4:c.547+1209G>A	?	benign
17	43092119	C	A	BRCA1	NC_000017.11:g.43092119C>A	NM_007294.4:c.3412G>T	G1138*	pathogenic
17	43093707	CTTTT	C	BRCA1	NC_000017.11:g.43093708_43093711del	NM_007294.4:c.1820_1823del	K607Rfs*4	pathogenic
17	43093552	AC	A	BRCA1	NC_000017.11:g.43093553del	NM_007294.4:c.1978del	V660Sfs*41	pathogenic
17	43085676	T	TA	BRCA1	NC_000017.11:g.43085677dup	NM_007294.4:c.4186-3102dup	?	benign
17	43094016	T	TA	BRCA1	NC_000017.11:g.43094016_43094017insA	NM_007294.4:c.1514_1515insT	K505Nfs*11	pathogenic
17	43094662	A	C	BRCA1	NC_000017.11:g.43094662A>C	NM_007294.4:c.869T>G	L290*	pathogenic
17	43094514	C	CG	BRCA1	NC_000017.11:g.43094514_43094515insG	NM_007294.4:c.1016_1017insC	K339Nfs*7	pathogenic
17	43092471	T	C	BRCA1	NC_000017.11:g.43092471T>C	NM_007294.4:c.3060A>G	P1020=	likely_benign
17	43093656	T	C	BRCA1	NC_000017.11:g.43093656T>C	NM_007294.4:c.1875A>G	L625=	likely_benign
17	43091531	CA	C	BRCA1	NC_000017.11:g.43091532del	NM_007294.4:c.3999del	G1334Vfs*2	pathogenic
17	43092272	CT	C	BRCA1	NC_000017.11:g.43092273del	NM_007294.4:c.3258del	V1088Ffs*21	pathogenic
17	43092222	A	T	BRCA1	NC_000017.11:g.43092222A>T	NM_007294.4:c.3309T>A	C1103*	pathogenic
17	43092388	C	A	BRCA1	NC_000017.11:g.43092388C>A	NM_007294.4:c.3143G>T	G1048V	benign
17	43092348	TA	T	BRCA1	NC_000017.11:g.43092349del	NM_007294.4:c.3182del	I1061Kfs*12	pathogenic
17	43093008	C	T	BRCA1	NC_000017.11:g.43093008C>T	NM_007294.4:c.2523G>A	R841=	likely_benign
17	43063368	TCA	T	BRCA1	NC_000017.11:g.43063369_43063370del	NM_007294.4:c.5156_5157del	V1719Dfs*5	pathogenic
17	43093345	TC	T	BRCA1	NC_000017.11:g.43093346del	NM_007294.4:c.2185del	E729Kfs*7	pathogenic
17	43094603	GT	G	BRCA1	NC_000017.11:g.43094604del	NM_007294.4:c.927del	K309Nfs*5	pathogenic
17	43094651	TAGTG	T	BRCA1	NC_000017.11:g.43094652_43094655del	NM_007294.4:c.876_879del	T293Kfs*4	pathogenic
17	43094644	CTG	C	BRCA1	NC_000017.11:g.43094645_43094646del	NM_007294.4:c.885_886del	D295Efs*8	pathogenic
17	43074332	TAGATCTTGCCTTGGCAAGTA	T	BRCA1	NC_000017.11:g.43074333_43074352del	NM_007294.4:c.4654_4673del	Y1552Rfs*15	pathogenic
17	43092410	AGCTG	A	BRCA1	NC_000017.11:g.43092411_43092414del	NM_007294.4:c.3117_3120del	S1040Qfs*7	pathogenic
17	43091464	TG	T	BRCA1	NC_000017.11:g.43091465del	NM_007294.4:c.4066del	Q1356Kfs*10	pathogenic
17	43115738	T	A	BRCA1	NC_000017.11:g.43115738T>A	NM_007294.4:c.122A>T	H41L	likely_pathogenic
17	43092848	GTT	G	BRCA1	NC_000017.11:g.43092849_43092850del	NM_007294.4:c.2681_2682del	K894Tfs*8	pathogenic
17	43067646	AG	A	BRCA1	NC_000017.11:g.43067647del	NM_007294.4:c.5035del	L1679*	pathogenic
17	43092615	TC	T	BRCA1	NC_000017.11:g.43092616del	NM_007294.4:c.2915del	G972Dfs*28	pathogenic
17	43093232	T	TA	BRCA1	NC_000017.11:g.43093233dup	NM_007294.4:c.2298dup	S767*	pathogenic
17	43090950	G	C	BRCA1	NC_000017.11:g.43090950G>C	NM_007294.4:c.4179C>G	T1393=	likely_benign
17	43057115	TC	T	BRCA1	NC_000017.11:g.43057116del	NM_007294.4:c.5213del	G1738Efs*27	pathogenic
17	43091016	C	T	BRCA1	NC_000017.11:g.43091016C>T	NM_007294.4:c.4113G>A	G1371=	likely_benign
17	43093914	CGTTTG	C	BRCA1	NC_000017.11:g.43093915_43093919del	NM_007294.4:c.1612_1616del	Q538Gfs*11	pathogenic
17	43092521	CAA	C	BRCA1	NC_000017.11:g.43092522_43092523del	NM_007294.4:c.3008_3009del	F1003*	pathogenic
17	43091916	C	T	BRCA1	NC_000017.11:g.43091916C>T	NM_007294.4:c.3615G>A	G1205=	likely_benign
17	43094668	CT	C	BRCA1	NC_000017.11:g.43094669del	NM_007294.4:c.862del	S288Afs*10	pathogenic
17	43092655	CT	C	BRCA1	NC_000017.11:g.43092656del	NM_007294.4:c.2875del	R959Efs*41	pathogenic
17	43094012	TC	T	BRCA1	NC_000017.11:g.43094013del	NM_007294.4:c.1518del	R507Dfs*25	pathogenic
17	43057610	C	A	BRCA1	NC_000017.11:g.43057610C>A	NM_007294.4:c.5194-475G>T	?	benign
17	43078520	A	T	BRCA1	NC_000017.11:g.43078520A>T	NM_007294.4:c.4358-1906T>A	?	benign
17	43094575	T	TAC	BRCA1	NC_000017.11:g.43094575_43094576insAC	NM_007294.4:c.955_956insGT	N319Sfs*23	pathogenic
17	43106865	G	A	BRCA1	NC_000017.11:g.43106865G>A	NM_007294.4:c.135-332C>T	?	benign
17	43092936	CT	C	BRCA1	NC_000017.11:g.43092937del	NM_007294.4:c.2594del	K865Sfs*28	pathogenic
17	43091910	C	CT	BRCA1	NC_000017.11:g.43091911dup	NM_007294.4:c.3620dup	K1208Efs*11	pathogenic
17	43092928	G	T	BRCA1	NC_000017.11:g.43092928G>T	NM_007294.4:c.2603C>A	S868*	pathogenic
17	43090959	G	GTC	BRCA1	NC_000017.11:g.43090960_43090961dup	NM_007294.4:c.4168_4169dup	D1390Efs*4	pathogenic
17	43094274	T	TA	BRCA1	NC_000017.11:g.43094275dup	NM_007294.4:c.1256dup	D420Rfs*2	pathogenic
17	43063909	C	T	BRCA1	NC_000017.11:g.43063909C>T	NM_007294.4:c.5117G>A	G1706E	pathogenic
17	43052636	T	C	BRCA1	NC_000017.11:g.43052636T>C	NM_007294.4:c.5278-1519A>G	?	benign
17	43107032	C	T	BRCA1	NC_000017.11:g.43107032C>T	NM_007294.4:c.135-499G>A	?	benign
17	43074433	G	A	BRCA1	NC_000017.11:g.43074433G>A	NM_007294.4:c.4573C>T	Q1525*	pathogenic
17	43092436	CTAATGTTATTA	C	BRCA1	NC_000017.11:g.43092437_43092447del	NM_007294.4:c.3084_3094del	N1029Rfs*5	pathogenic
17	43094459	G	A	BRCA1	NC_000017.11:g.43094459G>A	NM_007294.4:c.1072C>T	L358=	likely_benign
17	43093594	CT	C	BRCA1	NC_000017.11:g.43093595del	NM_007294.4:c.1936del	S646Afs*5	pathogenic
17	43063888	AC	A	BRCA1	NC_000017.11:g.43063889del	NM_007294.4:c.5137del	V1713*	pathogenic
17	43092525	GT	G	BRCA1	NC_000017.11:g.43092526del	NM_007294.4:c.3005del	N1002Tfs*22	pathogenic
17	43063899	TC	T	BRCA1	NC_000017.11:g.43063900del	NM_007294.4:c.5126del	G1709Efs*5	pathogenic
17	43076592	A	G	BRCA1	NC_000017.11:g.43076592A>G	NM_007294.4:c.4380T>C	S1460=	likely_benign
17	43093569	C	CT	BRCA1	NC_000017.11:g.43093570dup	NM_007294.4:c.1961dup	Y655Vfs*18	pathogenic
17	43094144	TC	T	BRCA1	NC_000017.11:g.43094145del	NM_007294.4:c.1386del	T464Pfs*11	pathogenic
17	43063898	C	A	BRCA1	NC_000017.11:g.43063898C>A	NM_007294.4:c.5128G>T	G1710*	pathogenic
17	43094656	AG	A	BRCA1	NC_000017.11:g.43094657del	NM_007294.4:c.874del	L292Sfs*6	pathogenic
17	43065535	A	C	BRCA1	NC_000017.11:g.43065535A>C	NM_007294.4:c.5075-1584T>G	?	benign
17	43094118	G	GA	BRCA1	NC_000017.11:g.43094119dup	NM_007294.4:c.1412dup	N473Qfs*7	pathogenic
17	43048825	C	T	BRCA1	NC_000017.11:g.43048825C>T	NM_007294.4:c.5406+296G>A	?	benign
17	43063937	A	G	BRCA1	NC_000017.11:g.43063937A>G	NM_007294.4:c.5089T>C	C1697R	pathogenic
17	43049188	AG	A	BRCA1	NC_000017.11:g.43049189del	NM_007294.4:c.5338del	L1780Wfs*13	pathogenic
17	43094389	TTCTGAATGCTGCTATTTAGTGTTATCCAAGGAACATCTTCAGTATCTCTAGGATTC	T	BRCA1	NC_000017.11:g.43094390_43094445del	NM_007294.4:c.1086_1141del	N363Sfs*2	pathogenic
17	43063941	A	AC	BRCA1	NC_000017.11:g.43063941_43063942insC	NM_007294.4:c.5084_5085insG	F1695Lfs*4	pathogenic
17	43093337	CT	C	BRCA1	NC_000017.11:g.43093338del	NM_007294.4:c.2193del	E732Kfs*4	pathogenic
17	43093463	T	A	BRCA1	NC_000017.11:g.43093463T>A	NM_007294.4:c.2068A>T	K690*	pathogenic
17	43091750	A	AT	BRCA1	NC_000017.11:g.43091751dup	NM_007294.4:c.3780dup	L1261Ifs*6	pathogenic
17	43104938	C	A	BRCA1	NC_000017.11:g.43104938C>A	NM_007294.4:c.231G>T	T77=	likely_benign
17	43106507	TG	T	BRCA1	NC_000017.11:g.43106508del	NM_007294.4:c.160del	Q54Rfs*15	pathogenic
17	43104138	G	T	BRCA1	NC_000017.11:g.43104138G>T	NM_007294.4:c.425C>A	P142H	benign
17	43071104	G	A	BRCA1	NC_000017.11:g.43071104G>A	NM_007294.4:c.4810C>T	Q1604*	pathogenic
17	43070994	TGTCAATTCTGGCTTCTCCC	T	BRCA1	NC_000017.11:g.43070995_43071013del	NM_007294.4:c.4901_4919del	R1634Kfs*18	pathogenic
17	43093566	G	T	BRCA1	NC_000017.11:g.43093566G>T	NM_007294.4:c.1965C>A	Y655*	pathogenic
17	43124046	AGCATTAATGACATTTTGTACTTCTTCAAC	A	BRCA1	NC_000017.11:g.43124047_43124075del	NM_007294.4:c.22_50del	V8Yfs*23	pathogenic
17	43104928	GAC	AA	BRCA1	NC_000017.11:g.43104928_43104930delinsAA	NM_007294.4:c.239_241delinsTT	S80Ifs*8	pathogenic
17	43071036	AT	A	BRCA1	NC_000017.11:g.43071037del	NM_007294.4:c.4877del	N1626Mfs*7	pathogenic
17	43061743	C	T	BRCA1	NC_000017.11:g.43061743C>T	NM_007294.4:c.5193+1590G>A	?	benign
17	43057061	C	T	BRCA1	NC_000017.11:g.43057061C>T	NM_007294.4:c.5268G>A	Q1756=	likely_benign
17	43057082	TGGACCTTGGTGGTTTCTTCCATTGACCACATCTCCTCTG	GA	BRCA1	NC_000017.11:g.43057082_43057121delinsGA	NM_007294.4:c.5208_5247delinsTC	R1737Qfs*80	pathogenic
17	43094364	AC	A	BRCA1	NC_000017.11:g.43094365del	NM_007294.4:c.1166del	S389Mfs*5	pathogenic
17	43094514	CT	C	BRCA1	NC_000017.11:g.43094515del	NM_007294.4:c.1016del	K339Rfs*2	pathogenic
17	43093632	TG	T	BRCA1	NC_000017.11:g.43093633del	NM_007294.4:c.1898del	P633Hfs*18	pathogenic
17	43094626	GC	G	BRCA1	NC_000017.11:g.43094627del	NM_007294.4:c.904del	A302Lfs*12	pathogenic
17	43094322	A	G	BRCA1	NC_000017.11:g.43094322A>G	NM_007294.4:c.1209T>C	S403=	likely_benign
17	43071054	A	G	BRCA1	NC_000017.11:g.43071054A>G	NM_007294.4:c.4860T>C	T1620=	likely_benign
17	43092731	GAC	G	BRCA1	NC_000017.11:g.43092732_43092733del	NM_007294.4:c.2798_2799del	G933Afs*4	pathogenic
17	43099820	T	A	BRCA1	NC_000017.11:g.43099820T>A	NM_007294.4:c.502A>T	K168*	pathogenic
17	43094018	T	TA	BRCA1	NC_000017.11:g.43094019dup	NM_007294.4:c.1512dup	K505*	pathogenic
17	43093391	T	TTG	BRCA1	NC_000017.11:g.43093392_43093393dup	NM_007294.4:c.2138_2139dup	N714Qfs*23	pathogenic
17	43094514	C	CT	BRCA1	NC_000017.11:g.43094515dup	NM_007294.4:c.1016dup	V340Gfs*6	pathogenic
17	43092808	TCTTC	T	BRCA1	NC_000017.11:g.43092809_43092812del	NM_007294.4:c.2719_2722del	E907Kfs*92	pathogenic
17	43066316	G	A	BRCA1	NC_000017.11:g.43066316G>A	NM_007294.4:c.5074+1292C>T	?	benign
17	43092115	C	A	BRCA1	NC_000017.11:g.43092115C>A	NM_007294.4:c.3416G>T	S1139I	benign
17	43092803	G	A	BRCA1	NC_000017.11:g.43092803G>A	NM_007294.4:c.2728C>T	Q910*	pathogenic
17	43091870	C	A	BRCA1	NC_000017.11:g.43091870C>A	NM_007294.4:c.3661G>T	E1221*	pathogenic
17	43063934	CA	C	BRCA1	NC_000017.11:g.43063935del	NM_007294.4:c.5091del	C1697Wfs*5	pathogenic
17	43094338	G	T	BRCA1	NC_000017.11:g.43094338G>T	NM_007294.4:c.1193C>A	S398*	pathogenic
17	43094582	G	A	BRCA1	NC_000017.11:g.43094582G>A	NM_007294.4:c.949C>T	Q317*	pathogenic
17	43092070	AAC	A	BRCA1	NC_000017.11:g.43092071_43092072del	NM_007294.4:c.3459_3460del	L1154Rfs*2	pathogenic
17	43063808	C	T	BRCA1	NC_000017.11:g.43063808C>T	NM_007294.4:c.5152+66G>A	?	benign
17	43090381	T	C	BRCA1	NC_000017.11:g.43090381T>C	NM_007294.4:c.4185+563A>G	?	benign
17	43093029	TC	T	BRCA1	NC_000017.11:g.43093030del	NM_007294.4:c.2501del	G834Dfs*12	pathogenic
17	43094449	G	C	BRCA1	NC_000017.11:g.43094449G>C	NM_007294.4:c.1082C>G	S361*	pathogenic
17	43092823	C	CAT	BRCA1	NC_000017.11:g.43092824_43092825dup	NM_007294.4:c.2706_2707dup	C903Yfs*98	pathogenic
17	43093771	AT	A	BRCA1	NC_000017.11:g.43093772del	NM_007294.4:c.1759del	I587*	pathogenic
17	43092671	G	A	BRCA1	NC_000017.11:g.43092671G>A	NM_007294.4:c.2860C>T	L954=	likely_benign
17	43094597	CA	C	BRCA1	NC_000017.11:g.43094598del	NM_007294.4:c.933del	G312Afs*2	pathogenic
17	43106472	TC	T	BRCA1	NC_000017.11:g.43106473del	NM_007294.4:c.195del	N66Mfs*3	pathogenic
17	43074370	C	T	BRCA1	NC_000017.11:g.43074370C>T	NM_007294.4:c.4636G>A	D1546N	benign
17	43070937	TG	T	BRCA1	NC_000017.11:g.43070938del	NM_007294.4:c.4976del	P1659Qfs*18	pathogenic
17	43045732	C	T	BRCA1	NC_000017.11:g.43045732C>T	NM_007294.4:c.5538G>A	Q1846=	likely_benign
17	43091457	C	T	BRCA1	NC_000017.11:g.43091457C>T	NM_007294.4:c.4074G>A	E1358=	likely_benign
17	43093171	TC	T	BRCA1	NC_000017.11:g.43093172del	NM_007294.4:c.2359del	E787Kfs*5	pathogenic
17	43092418	T	C	BRCA1	NC_000017.11:g.43092418T>C	NM_007294.4:c.3113A>G	E1038G	benign
17	43093273	C	CT	BRCA1	NC_000017.11:g.43093274dup	NM_007294.4:c.2257dup	S753Kfs*9	pathogenic
17	43073762	A	T	BRCA1	NC_000017.11:g.43073762A>T	NM_007294.4:c.4675+569T>A	?	benign
17	43098661	C	CT	BRCA1	NC_000017.11:g.43098661_43098662insT	NM_007294.4:c.547+1113_547+1114insA	?	benign
17	43094007	A	G	BRCA1	NC_000017.11:g.43094007A>G	NM_007294.4:c.1524T>C	P508=	likely_benign
17	43092852	CTTTA	C	BRCA1	NC_000017.11:g.43092853_43092856del	NM_007294.4:c.2675_2678del	L892*	pathogenic
17	43099792	GA	G	BRCA1	NC_000017.11:g.43099793del	NM_007294.4:c.529del	S177Lfs*57	pathogenic
17	43076553	A	T	BRCA1	NC_000017.11:g.43076553A>T	NM_007294.4:c.4419T>A	S1473=	likely_benign
17	43056450	A	G	BRCA1	NC_000017.11:g.43056450A>G	NM_007294.4:c.5277+602T>C	?	benign
17	43063369	C	CTATT	BRCA1	NC_000017.11:g.43063369_43063370insTATT	NM_007294.4:c.5156_5157insAATA	T1720Ifs*6	pathogenic
17	43063374	C	T	BRCA1	NC_000017.11:g.43063374C>T	NM_007294.4:c.5153-1G>A	?	pathogenic
17	43045757	A	T	BRCA1	NC_000017.11:g.43045757A>T	NM_007294.4:c.5513T>A	V1838E	pathogenic
17	43092204	TTTTA	T	BRCA1	NC_000017.11:g.43092205_43092208del	NM_007294.4:c.3323_3326del	I1108Kfs*8	pathogenic
17	43050562	G	A	BRCA1	NC_000017.11:g.43050562G>A	NM_007294.4:c.5332+501C>T	?	benign
17	43076536	AC	A	BRCA1	NC_000017.11:g.43076537del	NM_007294.4:c.4435del	V1479Cfs*26	pathogenic
17	43093770	T	G	BRCA1	NC_000017.11:g.43093770T>G	NM_007294.4:c.1761A>C	I587=	likely_benign
17	43094190	A	AC	BRCA1	NC_000017.11:g.43094190_43094191insC	NM_007294.4:c.1340_1341insG	H448Sfs*8	pathogenic
17	43092321	T	A	BRCA1	NC_000017.11:g.43092321T>A	NM_007294.4:c.3210A>T	A1070=	likely_benign
17	43125170	G	C	BRCA1	NC_000017.11:g.43125170G>C	NM_007294.4:c.-20+101C>G	?	benign
17	43093289	TG	T	BRCA1	NC_000017.11:g.43093290del	NM_007294.4:c.2241del	D749Ifs*4	pathogenic
17	43092439	A	AT	BRCA1	NC_000017.11:g.43092440dup	NM_007294.4:c.3091dup	I1031Nfs*2	pathogenic
17	43093359	AGGATTGACAAATTCTTTAAGTTCACTGGTATTTGAACACTTAGTAAAAGAACCAGGTGCATTTGTTAACTTCAGCTCTGGGAAAGTATCGCTGTCATGTCT	A	BRCA1	NC_000017.11:g.43093360_43093460del	NM_007294.4:c.2071_2171del	R691*	pathogenic
17	43109041	T	TCTATCTATCTACCTAC	BRCA1	NC_000017.11:g.43109042_43109057dup	NM_007294.4:c.135-2524_135-2509dup	?	benign
17	43092042	AGTAT	A	BRCA1	NC_000017.11:g.43092043_43092046del	NM_007294.4:c.3485_3488del	D1162Vfs*47	pathogenic
17	43093134	AT	A	BRCA1	NC_000017.11:g.43093135del	NM_007294.4:c.2396del	N799Ifs*4	pathogenic
17	43091613	CA	C	BRCA1	NC_000017.11:g.43091614del	NM_007294.4:c.3917del	L1306*	pathogenic
17	43093128	AC	A	BRCA1	NC_000017.11:g.43093129del	NM_007294.4:c.2402del	C801Lfs*2	pathogenic
17	43092548	TAC	T	BRCA1	NC_000017.11:g.43092549_43092550del	NM_007294.4:c.2981_2982del	C994*	pathogenic
17	43094550	T	G	BRCA1	NC_000017.11:g.43094550T>G	NM_007294.4:c.981A>C	T327=	likely_benign
17	43100558	G	A	BRCA1	NC_000017.11:g.43100558G>A	NM_007294.4:c.442-678C>T	?	benign
17	43093646	T	A	BRCA1	NC_000017.11:g.43093646T>A	NM_007294.4:c.1885A>T	R629*	pathogenic
17	43049187	C	T	BRCA1	NC_000017.11:g.43049187C>T	NM_007294.4:c.5340G>A	L1780=	likely_benign
17	43092770	G	A	BRCA1	NC_000017.11:g.43092770G>A	NM_007294.4:c.2761C>T	Q921*	pathogenic
17	43094327	C	A	BRCA1	NC_000017.11:g.43094327C>A	NM_007294.4:c.1204G>T	E402*	pathogenic
17	43094633	C	A	BRCA1	NC_000017.11:g.43094633C>A	NM_007294.4:c.898G>T	E300*	pathogenic
17	43057085	AC	A	BRCA1	NC_000017.11:g.43057086del	NM_007294.4:c.5243del	G1748Vfs*17	pathogenic
17	43124016	CCAGATGGGACA	C	BRCA1	NC_000017.11:g.43124017_43124027del	NM_007294.4:c.70_80del	C24Sfs*13	pathogenic
17	43067662	TG	T	BRCA1	NC_000017.11:g.43067663del	NM_007294.4:c.5019del	H1673Qfs*4	pathogenic
17	43094022	CT	C	BRCA1	NC_000017.11:g.43094023del	NM_007294.4:c.1508del	K503Sfs*29	pathogenic
17	43077840	G	A	BRCA1	NC_000017.11:g.43077840G>A	NM_007294.4:c.4358-1226C>T	?	benign
17	43082475	T	TC	BRCA1	NC_000017.11:g.43082475_43082476insC	NM_007294.4:c.4285_4286insG	Y1429*	pathogenic
17	43093268	C	A	BRCA1	NC_000017.11:g.43093268C>A	NM_007294.4:c.2263G>T	E755*	pathogenic
17	43094485	TCA	T	BRCA1	NC_000017.11:g.43094486_43094487del	NM_007294.4:c.1044_1045del	C348*	pathogenic
17	43071070	G	GC	BRCA1	NC_000017.11:g.43071071dup	NM_007294.4:c.4843dup	A1615Gfs*7	pathogenic
17	43094852	C	CG	BRCA1	NC_000017.11:g.43094852_43094853insG	NM_007294.4:c.678_679insC	E227Rfs*4	pathogenic
17	43124031	T	TAA	BRCA1	NC_000017.11:g.43124032_43124033dup	NM_007294.4:c.64_65dup	L22Ffs*2	pathogenic
17	43077795	A	G	BRCA1	NC_000017.11:g.43077795A>G	NM_007294.4:c.4358-1181T>C	?	benign
17	43091569	GA	G	BRCA1	NC_000017.11:g.43091570del	NM_007294.4:c.3961del	S1321Pfs*4	pathogenic
17	43094760	A	ATC	BRCA1	NC_000017.11:g.43094760_43094761insTC	NM_007294.4:c.770_771insGA	H257Qfs*42	pathogenic
17	43094607	GC	G	BRCA1	NC_000017.11:g.43094608del	NM_007294.4:c.923del	S308Tfs*6	pathogenic
17	43045777	AG	A	BRCA1	NC_000017.11:g.43045778del	NM_007294.4:c.5492del	P1831Lfs*3	pathogenic
17	43093440	G	GA	BRCA1	NC_000017.11:g.43093441dup	NM_007294.4:c.2090dup	E699Rfs*13	pathogenic
17	43091783	C	CGGTAGCAACGGTGCTATGCCTAGTAGACTGAGAAGGTATATTG	BRCA1	NC_000017.11:g.43091784_43091826dup	NM_007294.4:c.3705_3747dup	E1250Qfs*8	pathogenic
17	43092865	G	GA	BRCA1	NC_000017.11:g.43092866dup	NM_007294.4:c.2665dup	S889Ffs*14	pathogenic
17	43091616	GT	G	BRCA1	NC_000017.11:g.43091617del	NM_007294.4:c.3914del	D1305Afs*2	pathogenic
17	43063363	CT	C	BRCA1	NC_000017.11:g.43063364del	NM_007294.4:c.5162del	Q1721Rfs*9	pathogenic
17	43091613	C	T	BRCA1	NC_000017.11:g.43091613C>T	NM_007294.4:c.3918G>A	L1306=	likely_benign
17	43092747	GC	G	BRCA1	NC_000017.11:g.43092748del	NM_007294.4:c.2783del	G928Afs*72	pathogenic
17	43094418	A	G	BRCA1	NC_000017.11:g.43094418A>G	NM_007294.4:c.1113T>C	P371=	likely_benign
17	43045736	T	TC	BRCA1	NC_000017.11:g.43045736_43045737insC	NM_007294.4:c.5533_5534insG	Y1845*	pathogenic
17	43092603	GT	G	BRCA1	NC_000017.11:g.43092604del	NM_007294.4:c.2927del	N976Tfs*24	pathogenic
17	43091522	CACTCAGACCA	C	BRCA1	NC_000017.11:g.43091523_43091532del	NM_007294.4:c.3999_4008del	G1334Tfs*29	pathogenic
17	43115729	C	T	BRCA1	NC_000017.11:g.43115729C>T	NM_007294.4:c.131G>A	C44Y	pathogenic
17	43094838	C	A	BRCA1	NC_000017.11:g.43094838C>A	NM_007294.4:c.693G>T	T231=	likely_benign
17	43093092	T	TC	BRCA1	NC_000017.11:g.43093093dup	NM_007294.4:c.2438dup	L814Tfs*9	pathogenic
17	43125086	A	C	BRCA1	NC_000017.11:g.43125086A>C	NM_007294.4:c.-20+185T>G	?	benign
17	43124026	C	CT	BRCA1	NC_000017.11:g.43124026_43124027insT	NM_007294.4:c.70_71insA	C24*	pathogenic
17	43071217	G	GT	BRCA1	NC_000017.11:g.43071217_43071218insT	NM_007294.4:c.4696_4697insA	S1566Yfs*8	pathogenic
17	43094166	A	ATC	BRCA1	NC_000017.11:g.43094166_43094167insTC	NM_007294.4:c.1364_1365insGA	N455Kfs*21	pathogenic
17	43094420	GA	G	BRCA1	NC_000017.11:g.43094421del	NM_007294.4:c.1110del	P371Lfs*3	pathogenic
17	43063370	A	AC	BRCA1	NC_000017.11:g.43063371dup	NM_007294.4:c.5155dup	V1719Gfs*6	pathogenic
17	43093393	G	T	BRCA1	NC_000017.11:g.43093393G>T	NM_007294.4:c.2138C>A	S713*	pathogenic
17	43092979	TC	T	BRCA1	NC_000017.11:g.43092980del	NM_007294.4:c.2551del	E851Nfs*42	pathogenic
17	43050671	G	A	BRCA1	NC_000017.11:g.43050671G>A	NM_007294.4:c.5332+392C>T	?	benign
17	43093073	TG	T	BRCA1	NC_000017.11:g.43093074del	NM_007294.4:c.2457del	D821Ifs*25	pathogenic
17	43091686	TC	T	BRCA1	NC_000017.11:g.43091687del	NM_007294.4:c.3844del	E1282Nfs*25	pathogenic
17	43070937	T	G	BRCA1	NC_000017.11:g.43070937T>G	NM_007294.4:c.4977A>C	P1659=	likely_benign
17	43092962	A	G	BRCA1	NC_000017.11:g.43092962A>G	NM_007294.4:c.2569T>C	L857=	likely_benign
17	43076574	G	GT	BRCA1	NC_000017.11:g.43076574_43076575insT	NM_007294.4:c.4397_4398insA	S1466Rfs*10	pathogenic
17	43094724	CAAGTTTGAAAC	T	BRCA1	NC_000017.11:g.43094724_43094735delinsT	NM_007294.4:c.796_807delinsA	V266Tfs*17	pathogenic
17	43092669	T	C	BRCA1	NC_000017.11:g.43092669T>C	NM_007294.4:c.2862A>G	L954=	likely_benign
17	43104156	C	CT	BRCA1	NC_000017.11:g.43104157dup	NM_007294.4:c.406dup	R136Kfs*6	pathogenic
17	43104120	A	C	BRCA1	NC_000017.11:g.43104120A>C	NM_007294.4:c.441+2T>G	?	pathogenic
17	43092324	TTGAA	T	BRCA1	NC_000017.11:g.43092325_43092328del	NM_007294.4:c.3203_3206del	I1068Kfs*4	pathogenic
17	43093121	G	A	BRCA1	NC_000017.11:g.43093121G>A	NM_007294.4:c.2410C>T	Q804*	pathogenic
17	43092919	G	AA	BRCA1	NC_000017.11:g.43092919delinsAA	NM_007294.4:c.2612delinsTT	P871Lfs*32	pathogenic
17	43082464	TGATGGAA	T	BRCA1	NC_000017.11:g.43082465_43082471del	NM_007294.4:c.4290_4296del	S1431*	pathogenic
17	43092738	C	T	BRCA1	NC_000017.11:g.43092738C>T	NM_007294.4:c.2793G>A	V931=	likely_benign
17	43104148	GTAGA	G	BRCA1	NC_000017.11:g.43104149_43104152del	NM_007294.4:c.411_414del	L138Rfs*24	pathogenic
17	43092200	G	GT	BRCA1	NC_000017.11:g.43092200_43092201insT	NM_007294.4:c.3330_3331insA	Q1111Tfs*4	pathogenic
17	43063926	T	C	BRCA1	NC_000017.11:g.43063926T>C	NM_007294.4:c.5100A>G	T1700=	likely_benign
17	43094577	ATGTTG	A	BRCA1	NC_000017.11:g.43094578_43094582del	NM_007294.4:c.949_953del	Q317*	pathogenic
17	43092117	T	TC	BRCA1	NC_000017.11:g.43092118dup	NM_007294.4:c.3413dup	S1139Kfs*2	pathogenic
17	43092658	A	AT	BRCA1	NC_000017.11:g.43092658_43092659insT	NM_007294.4:c.2872_2873insA	F958Yfs*13	pathogenic
17	43092268	AC	A	BRCA1	NC_000017.11:g.43092269del	NM_007294.4:c.3262del	V1088Ffs*21	pathogenic
17	43082553	TTA	T	BRCA1	NC_000017.11:g.43082554_43082555del	NM_007294.4:c.4206_4207del	H1402Qfs*11	pathogenic
17	43093861	GT	G	BRCA1	NC_000017.11:g.43093862del	NM_007294.4:c.1669del	T557Qfs*15	pathogenic
17	43093257	CA	C	BRCA1	NC_000017.11:g.43093258del	NM_007294.4:c.2273del	L758Cfs*7	pathogenic
17	43094290	T	TC	BRCA1	NC_000017.11:g.43094291dup	NM_007294.4:c.1240dup	D414Gfs*5	pathogenic
17	43093425	TA	T	BRCA1	NC_000017.11:g.43093426del	NM_007294.4:c.2105del	L702*	pathogenic
17	43093198	C	CCA	BRCA1	NC_000017.11:g.43093199_43093200dup	NM_007294.4:c.2331_2332dup	G778Vfs*15	pathogenic
17	43093615	A	T	BRCA1	NC_000017.11:g.43093615A>T	NM_007294.4:c.1916T>A	L639*	pathogenic
17	43104232	C	CT	BRCA1	NC_000017.11:g.43104232_43104233insT	NM_007294.4:c.330_331insA	E111Rfs*3	pathogenic
17	43106470	A	G	BRCA1	NC_000017.11:g.43106470A>G	NM_007294.4:c.198T>C	N66=	likely_benign
17	43092275	A	AT	BRCA1	NC_000017.11:g.43092276dup	NM_007294.4:c.3255dup	L1086Ifs*7	pathogenic
17	43068303	C	A	BRCA1	NC_000017.11:g.43068303C>A	NM_007294.4:c.4987-608G>T	?	benign
17	43115729	C	CA	BRCA1	NC_000017.11:g.43115730dup	NM_007294.4:c.130dup	C44Lfs*22	pathogenic
17	43092640	CCA	C	BRCA1	NC_000017.11:g.43092641_43092642del	NM_007294.4:c.2889_2890del	G964Tfs*6	pathogenic
17	43051082	G	A	BRCA1	NC_000017.11:g.43051082G>A	NM_007294.4:c.5313C>T	P1771=	likely_benign
17	43093482	C	T	BRCA1	NC_000017.11:g.43093482C>T	NM_007294.4:c.2049G>A	K683=	likely_benign
17	43072816	G	C	BRCA1	NC_000017.11:g.43072816G>C	NM_007294.4:c.4675+1515C>G	?	benign
17	43050573	A	T	BRCA1	NC_000017.11:g.43050573A>T	NM_007294.4:c.5332+490T>A	?	benign
17	43071154	G	C	BRCA1	NC_000017.11:g.43071154G>C	NM_007294.4:c.4760C>G	S1587*	pathogenic
17	43092222	A	AG	BRCA1	NC_000017.11:g.43092222_43092223insG	NM_007294.4:c.3308_3309insC	K1104*	pathogenic
17	43047690	A	AT	BRCA1	NC_000017.11:g.43047691dup	NM_007294.4:c.5419dup	I1807Nfs*23	pathogenic
17	43074470	ACT	A	BRCA1	NC_000017.11:g.43074471_43074472del	NM_007294.4:c.4534_4535del	S1512Lfs*8	pathogenic
17	43057092	TG	T	BRCA1	NC_000017.11:g.43057093del	NM_007294.4:c.5236del	H1746Tfs*19	pathogenic
17	43082408	T	C	BRCA1	NC_000017.11:g.43082408T>C	NM_007294.4:c.4353A>G	E1451=	likely_benign
17	43045450	T	C	BRCA1	NC_000017.11:g.43045450T>C	NM_007294.4:c.*228A>G	?	benign
17	43092045	AT	A	BRCA1	NC_000017.11:g.43092046del	NM_007294.4:c.3485del	D1162Vfs*48	pathogenic
17	43049128	AG	A	BRCA1	NC_000017.11:g.43049129del	NM_007294.4:c.5398del	G1801Afs*33	pathogenic
17	43092517	TC	T	BRCA1	NC_000017.11:g.43092518del	NM_007294.4:c.3013del	E1005Nfs*19	pathogenic
17	43094486	C	A	BRCA1	NC_000017.11:g.43094486C>A	NM_007294.4:c.1045G>T	E349*	pathogenic
17	43092273	T	TA	BRCA1	NC_000017.11:g.43092274dup	NM_007294.4:c.3257dup	L1086Ffs*7	pathogenic
17	43054835	T	C	BRCA1	NC_000017.11:g.43054835T>C	NM_007294.4:c.5277+2217A>G	?	benign
17	43092021	AATGTC	A	BRCA1	NC_000017.11:g.43092022_43092026del	NM_007294.4:c.3505_3509del	D1169*	pathogenic
17	43091567	T	A	BRCA1	NC_000017.11:g.43091567T>A	NM_007294.4:c.3964A>T	K1322*	pathogenic
17	43091814	AGA	G	BRCA1	NC_000017.11:g.43091814_43091816delinsG	NM_007294.4:c.3715_3717delinsC	S1239Pfs*4	pathogenic
17	43092633	A	G	BRCA1	NC_000017.11:g.43092633A>G	NM_007294.4:c.2898T>C	I966=	likely_benign
17	43124049	ATTAATGACATTTTGTACTTCTTCAACGCG	A	BRCA1	NC_000017.11:g.43124050_43124078del	NM_007294.4:c.19_47del	R7Cfs*24	pathogenic
17	43091884	A	T	BRCA1	NC_000017.11:g.43091884A>T	NM_007294.4:c.3647T>A	L1216*	pathogenic
17	43092798	T	C	BRCA1	NC_000017.11:g.43092798T>C	NM_007294.4:c.2733A>G	G911=	likely_benign
17	43091856	G	T	BRCA1	NC_000017.11:g.43091856G>T	NM_007294.4:c.3675C>A	C1225*	pathogenic
17	43093139	GTT	G	BRCA1	NC_000017.11:g.43093140_43093141del	NM_007294.4:c.2390_2391del	E797Afs*3	pathogenic
17	43091987	G	A	BRCA1	NC_000017.11:g.43091987G>A	NM_007294.4:c.3544C>T	Q1182*	pathogenic
17	43094426	CT	C	BRCA1	NC_000017.11:g.43094427del	NM_007294.4:c.1104del	D369Mfs*5	pathogenic
17	43104155	TC	T	BRCA1	NC_000017.11:g.43104156del	NM_007294.4:c.407del	R136Nfs*27	pathogenic
17	43115727	T	G	BRCA1	NC_000017.11:g.43115727T>G	NM_007294.4:c.133A>C	K45Q	benign
17	43115788	G	C	BRCA1	NC_000017.11:g.43115788G>C	NM_007294.4:c.81-9C>G	?	pathogenic
17	43094491	AG	A	BRCA1	NC_000017.11:g.43094492del	NM_007294.4:c.1039del	L347Cfs*27	pathogenic
17	43057087	CT	C	BRCA1	NC_000017.11:g.43057088del	NM_007294.4:c.5241del	G1748Vfs*17	pathogenic
17	43093686	A	AC	BRCA1	NC_000017.11:g.43093686_43093687insC	NM_007294.4:c.1844_1845insG	S616Ffs*9	pathogenic
17	43066220	T	C	BRCA1	NC_000017.11:g.43066220T>C	NM_007294.4:c.5074+1388A>G	?	benign
17	43093899	T	C	BRCA1	NC_000017.11:g.43093899T>C	NM_007294.4:c.1632A>G	Q544=	likely_benign
17	43094381	C	A	BRCA1	NC_000017.11:g.43094381C>A	NM_007294.4:c.1150G>T	E384*	pathogenic
17	43093684	G	GA	BRCA1	NC_000017.11:g.43093685dup	NM_007294.4:c.1846dup	S616Ffs*9	pathogenic
17	43091450	T	G	BRCA1	NC_000017.11:g.43091450T>G	NM_007294.4:c.4081A>C	M1361L	benign
17	43070972	TG	T	BRCA1	NC_000017.11:g.43070973del	NM_007294.4:c.4941del	N1647Kfs*11	pathogenic
17	43051110	CT	C	BRCA1	NC_000017.11:g.43051111del	NM_007294.4:c.5284del	R1762Gfs*3	pathogenic
17	43123815	G	A	BRCA1	NC_000017.11:g.43123815G>A	NM_007294.4:c.80+202C>T	?	benign
17	43092236	GA	G	BRCA1	NC_000017.11:g.43092237del	NM_007294.4:c.3294del	P1099Lfs*10	pathogenic
17	43104156	CT	C	BRCA1	NC_000017.11:g.43104157del	NM_007294.4:c.406del	R136Dfs*27	pathogenic
17	43075066	C	CGGAA	BRCA1	NC_000017.11:g.43075067_43075070dup	NM_007294.4:c.4485-549_4485-546dup	-	benign
17	43072249	C	T	BRCA1	NC_000017.11:g.43072249C>T	NM_007294.4:c.4676-1011G>A	?	benign
17	43093337	C	A	BRCA1	NC_000017.11:g.43093337C>A	NM_007294.4:c.2194G>T	E732*	pathogenic
17	43082506	C	G	BRCA1	NC_000017.11:g.43082506C>G	NM_007294.4:c.4255G>C	E1419Q	benign
17	43092776	GCT	TG	BRCA1	NC_000017.11:g.43092776_43092778delinsTG	NM_007294.4:c.2753_2755delinsCA	K918Tfs*82	pathogenic
17	43047662	T	C	BRCA1	NC_000017.11:g.43047662T>C	NM_007294.4:c.5448A>G	T1816=	likely_benign
17	43122772	C	T	BRCA1	NC_000017.11:g.43122772C>T	NM_007294.4:c.80+1245G>A	?	benign
17	43091627	C	A	BRCA1	NC_000017.11:g.43091627C>A	NM_007294.4:c.3904G>T	E1302*	pathogenic
17	43091752	A	C	BRCA1	NC_000017.11:g.43091752A>C	NM_007294.4:c.3779T>G	L1260*	pathogenic
17	43091727	A	G	BRCA1	NC_000017.11:g.43091727A>G	NM_007294.4:c.3804T>C	N1268=	likely_benign
17	43093382	C	A	BRCA1	NC_000017.11:g.43093382C>A	NM_007294.4:c.2149G>T	E717*	pathogenic
17	43071189	A	C	BRCA1	NC_000017.11:g.43071189A>C	NM_007294.4:c.4725T>G	P1575=	likely_benign
17	43094541	A	G	BRCA1	NC_000017.11:g.43094541A>G	NM_007294.4:c.990T>C	D330=	likely_benign
17	43090268	T	G	BRCA1	NC_000017.11:g.43090268T>G	NM_007294.4:c.4185+676A>C	?	benign
17	43120293	G	C	BRCA1	NC_000017.11:g.43120293G>C	NM_007294.4:c.80+3724C>G	?	benign
17	43106501	T	TTC	BRCA1	NC_000017.11:g.43106502_43106503dup	NM_007294.4:c.165_166dup	K56Rfs*14	pathogenic
17	43076103	T	C	BRCA1	NC_000017.11:g.43076103T>C	NM_007294.4:c.4484+385A>G	?	benign
17	43074393	T	TC	BRCA1	NC_000017.11:g.43074393_43074394insC	NM_007294.4:c.4612_4613insG	Q1538Rfs*36	pathogenic
17	43051095	CA	C	BRCA1	NC_000017.11:g.43051096del	NM_007294.4:c.5299del	C1767Vfs*26	pathogenic
17	43093201	TA	T	BRCA1	NC_000017.11:g.43093202del	NM_007294.4:c.2329del	Y777Mfs*15	pathogenic
17	43116451	G	C	BRCA1	NC_000017.11:g.43116451G>C	NM_007294.4:c.81-672C>G	?	benign
17	43092297	T	C	BRCA1	NC_000017.11:g.43092297T>C	NM_007294.4:c.3234A>G	P1078=	likely_benign
17	43094646	GTCTTT	G	BRCA1	NC_000017.11:g.43094647_43094651del	NM_007294.4:c.880_884del	K294Qfs*8	pathogenic
17	43092643	GT	G	BRCA1	NC_000017.11:g.43092644del	NM_007294.4:c.2887del	T963Lfs*37	pathogenic
17	43093566	G	GC	BRCA1	NC_000017.11:g.43093566_43093567insC	NM_007294.4:c.1964_1965insG	Y655*	pathogenic
17	43094852	C	A	BRCA1	NC_000017.11:g.43094852C>A	NM_007294.4:c.679G>T	E227*	pathogenic
17	43094060	G	A	BRCA1	NC_000017.11:g.43094060G>A	NM_007294.4:c.1471C>T	Q491*	pathogenic
17	43092519	C	T	BRCA1	NC_000017.11:g.43092519C>T	NM_007294.4:c.3012G>A	E1004=	likely_benign
17	43066730	C	T	BRCA1	NC_000017.11:g.43066730C>T	NM_007294.4:c.5074+878G>A	?	benign
17	43093605	A	G	BRCA1	NC_000017.11:g.43093605A>G	NM_007294.4:c.1926T>C	D642=	likely_benign
17	43092170	TAA	T	BRCA1	NC_000017.11:g.43092171_43092172del	NM_007294.4:c.3359_3360del	V1120Efs*12	pathogenic
17	43093129	CATTT	C	BRCA1	NC_000017.11:g.43093130_43093133del	NM_007294.4:c.2398_2401del	K800Vfs*2	pathogenic
17	43063343	AT	A	BRCA1	NC_000017.11:g.43063344del	NM_007294.4:c.5182del	M1728Cfs*2	pathogenic
17	43091498	C	A	BRCA1	NC_000017.11:g.43091498C>A	NM_007294.4:c.4033G>T	E1345*	pathogenic
17	43092802	TG	T	BRCA1	NC_000017.11:g.43092803del	NM_007294.4:c.2728del	Q910Kfs*90	pathogenic
17	43093315	T	TAG	BRCA1	NC_000017.11:g.43093315_43093316insAG	NM_007294.4:c.2215_2216insCT	K739Tfs*15	pathogenic
17	43093930	TG	T	BRCA1	NC_000017.11:g.43093931del	NM_007294.4:c.1600del	Q534Rfs*12	pathogenic
17	43091811	C	T	BRCA1	NC_000017.11:g.43091811C>T	NM_007294.4:c.3720G>A	Q1240=	likely_benign
17	43092570	C	CT	BRCA1	NC_000017.11:g.43092571dup	NM_007294.4:c.2960dup	S988Vfs*4	pathogenic
17	43094627	C	CA	BRCA1	NC_000017.11:g.43094627_43094628insA	NM_007294.4:c.903_904insT	A302Cfs*2	pathogenic
17	43071074	G	A	BRCA1	NC_000017.11:g.43071074G>A	NM_007294.4:c.4840C>T	P1614S	benign
17	43104928	G	A	BRCA1	NC_000017.11:g.43104928G>A	NM_007294.4:c.241C>T	Q81*	pathogenic
17	43094751	C	CTT	BRCA1	NC_000017.11:g.43094752_43094753dup	NM_007294.4:c.778_779dup	Y261Sfs*38	pathogenic
17	43051090	AG	A	BRCA1	NC_000017.11:g.43051091del	NM_007294.4:c.5304del	Y1769Mfs*24	pathogenic
17	43091019	A	G	BRCA1	NC_000017.11:g.43091019A>G	NM_007294.4:c.4110T>C	S1370=	likely_benign
17	43092153	TG	T	BRCA1	NC_000017.11:g.43092154del	NM_007294.4:c.3377del	P1126Hfs*3	pathogenic
17	43091707	ATTACC	A	BRCA1	NC_000017.11:g.43091708_43091712del	NM_007294.4:c.3819_3823del	Q1273Hfs*12	pathogenic
17	43092515	GT	G	BRCA1	NC_000017.11:g.43092516del	NM_007294.4:c.3015del	E1005Dfs*19	pathogenic
17	43063892	AT	A	BRCA1	NC_000017.11:g.43063893del	NM_007294.4:c.5133del	K1711Nfs*3	pathogenic
17	43093464	ACTTG	A	BRCA1	NC_000017.11:g.43093465_43093468del	NM_007294.4:c.2063_2066del	T688Ifs*12	pathogenic
17	43104861	C	T	BRCA1	NC_000017.11:g.43104861C>T	NM_007294.4:c.301+7G>A	?	benign
17	43071028	TCCATTGCATTATA	T	BRCA1	NC_000017.11:g.43071029_43071041del	NM_007294.4:c.4873_4885del	Y1625Kfs*4	pathogenic
17	43094179	G	T	BRCA1	NC_000017.11:g.43094179G>T	NM_007294.4:c.1352C>A	S451*	pathogenic
17	43092812	C	A	BRCA1	NC_000017.11:g.43092812C>A	NM_007294.4:c.2719G>T	E907*	pathogenic
17	43084625	T	C	BRCA1	NC_000017.11:g.43084625T>C	NM_007294.4:c.4186-2050A>G	?	benign
17	43093055	TG	T	BRCA1	NC_000017.11:g.43093056del	NM_007294.4:c.2475del	D825Efs*21	pathogenic
17	43094174	CT	C	BRCA1	NC_000017.11:g.43094175del	NM_007294.4:c.1356del	E453Rfs*22	pathogenic
17	43091748	TA	T	BRCA1	NC_000017.11:g.43091749del	NM_007294.4:c.3782del	L1261Yfs*3	pathogenic
17	43094696	G	GT	BRCA1	NC_000017.11:g.43094696_43094697insT	NM_007294.4:c.834_835insA	H279Tfs*8	pathogenic
17	43093808	C	A	BRCA1	NC_000017.11:g.43093808C>A	NM_007294.4:c.1723G>T	E575*	pathogenic
17	43124027	A	ACT	BRCA1	NC_000017.11:g.43124028_43124029dup	NM_007294.4:c.68_69dup	C24Sfs*8	pathogenic
17	43092237	AAG	A	BRCA1	NC_000017.11:g.43092238_43092239del	NM_007294.4:c.3292_3293del	L1098Sfs*4	pathogenic
17	43091928	A	C	BRCA1	NC_000017.11:g.43091928A>C	NM_007294.4:c.3603T>G	G1201=	likely_benign
17	43124064	T	TG	BRCA1	NC_000017.11:g.43124064_43124065insG	NM_007294.4:c.32_33insC	Q12Tfs*5	pathogenic
17	43092660	C	CT	BRCA1	NC_000017.11:g.43092661dup	NM_007294.4:c.2870dup	F958Vfs*13	pathogenic
17	43090058	AAAG	A	BRCA1	NC_000017.11:g.43090059_43090061del	NM_007294.4:c.4185+883_4185+885del	-	benign
17	43110292	T	C	BRCA1	NC_000017.11:g.43110292T>C	NM_007294.4:c.135-3759A>G	?	benign
17	43093661	C	A	BRCA1	NC_000017.11:g.43093661C>A	NM_007294.4:c.1870G>T	E624*	pathogenic
17	43074395	T	TGG	BRCA1	NC_000017.11:g.43074395_43074396insGG	NM_007294.4:c.4610_4611insCC	Q1537Hfs*12	pathogenic
17	43124028	CT	C	BRCA1	NC_000017.11:g.43124029del	NM_007294.4:c.68del	E23Gfs*8	pathogenic
17	43093321	GT	G	BRCA1	NC_000017.11:g.43093322del	NM_007294.4:c.2209del	T737Qfs*16	pathogenic
17	43071102	T	C	BRCA1	NC_000017.11:g.43071102T>C	NM_007294.4:c.4812A>G	Q1604=	benign
17	43092695	T	TA	BRCA1	NC_000017.11:g.43092696dup	NM_007294.4:c.2835dup	I946Yfs*6	pathogenic
17	43122761	G	A	BRCA1	NC_000017.11:g.43122761G>A	NM_007294.4:c.80+1256C>T	?	benign
17	43091465	GATTA	G	BRCA1	NC_000017.11:g.43091466_43091469del	NM_007294.4:c.4062_4065del	N1355Kfs*10	pathogenic
17	43091989	ACG	A	BRCA1	NC_000017.11:g.43091990_43091991del	NM_007294.4:c.3540_3541del	V1181Pfs*6	pathogenic
17	43071107	GA	G	BRCA1	NC_000017.11:g.43071108del	NM_007294.4:c.4806del	Q1604Nfs*2	pathogenic
17	43051574	T	C	BRCA1	NC_000017.11:g.43051574T>C	NM_007294.4:c.5278-457A>G	?	benign
17	43049185	TC	T	BRCA1	NC_000017.11:g.43049186del	NM_007294.4:c.5341del	E1781Nfs*12	pathogenic
17	43104947	T	C	BRCA1	NC_000017.11:g.43104947T>C	NM_007294.4:c.222A>G	Q74=	likely_benign
17	43100689	A	ATGT	BRCA1	NC_000017.11:g.43100689_43100690insTGT	NM_007294.4:c.442-810_442-809insACA	?	benign
17	43110085	G	A	BRCA1	NC_000017.11:g.43110085G>A	NM_007294.4:c.135-3552C>T	?	benign
17	43094169	AC	A	BRCA1	NC_000017.11:g.43094170del	NM_007294.4:c.1361del	S454Ifs*21	pathogenic
17	43094387	CTT	C	BRCA1	NC_000017.11:g.43094388_43094389del	NM_007294.4:c.1142_1143del	K381Sfs*2	pathogenic
17	43094703	TGTG	ATT	BRCA1	NC_000017.11:g.43094703_43094706delinsATT	NM_007294.4:c.825_828delinsAAT	T276Ifs*22	pathogenic
17	43064189	T	C	BRCA1	NC_000017.11:g.43064189T>C	NM_007294.4:c.5075-238A>G	?	benign
17	43078281	T	TACCATGTTGGCCAGGCTGGTCTTAAACTCCTGACCTCAGGTGATCCGCCAACCTTGGCCTCACAAAGTGCTGGGATTATAGGCATGAGCCACCATACCCAGCCTGGTCTAGAACTCTTAAACTCAAGTGATCCTCCTGCCTTGGCATCTCACAGTGCTGGGATTATAGGCGTGAGCCACCATGCCTGGCCAAGGCGGAAATATTTAATAAGTAAAAACAAATAGTTAAAAATTGCAAAAGTCTTCTATTCATTAAAAAGTCACTGATGACTGTAATTCATTTTGAGCTTTTATTAGAAAAGCTAAAAGCCATAAATATAGGTAGAAAATTGAAACAAAAGATTGTATTAATTAAACTGTTTTTTTAAGACACTGGGTAGCCTGGGGGGAAATAATCAT…	BRCA1	NC_000017.11:g.43078282_43084362dup	NM_007294.4:c.4186-1787_4358-1668dup	?	pathogenic
17	43076540	C	A	BRCA1	NC_000017.11:g.43076540C>A	NM_007294.4:c.4432G>T	E1478*	pathogenic
17	43093487	T	TA	BRCA1	NC_000017.11:g.43093488dup	NM_007294.4:c.2043dup	N682*	pathogenic
17	43092068	C	CT	BRCA1	NC_000017.11:g.43092069dup	NM_007294.4:c.3462dup	D1155Rfs*2	pathogenic
17	43093482	CT	C	BRCA1	NC_000017.11:g.43093483del	NM_007294.4:c.2048del	K683Sfs*18	pathogenic
17	43124094	C	A	BRCA1	NC_000017.11:g.43124094C>A	NM_007294.4:c.3G>T	Met1?	pathogenic
17	43056737	A	G	BRCA1	NC_000017.11:g.43056737A>G	NM_007294.4:c.5277+315T>C	?	benign
17	43094779	TTC	T	BRCA1	NC_000017.11:g.43094780_43094781del	NM_007294.4:c.750_751del	K251Afs*4	pathogenic
17	43096544	C	G	BRCA1	NC_000017.11:g.43096544C>G	NM_007294.4:c.594-622G>C	?	benign
17	43099779	T	C	BRCA1	NC_000017.11:g.43099779T>C	NM_007294.4:c.543A>G	E181=	likely_benign
17	43070933	C	A	BRCA1	NC_000017.11:g.43070933C>A	NM_007294.4:c.4981G>T	E1661*	pathogenic
17	43121362	G	C	BRCA1	NC_000017.11:g.43121362G>C	NM_007294.4:c.80+2655C>G	?	benign
17	43091847	G	A	BRCA1	NC_000017.11:g.43091847G>A	NM_007294.4:c.3684C>T	H1228=	benign
17	43092477	G	GTCTCA	BRCA1	NC_000017.11:g.43092477_43092478insTCTCA	NM_007294.4:c.3053_3054insTGAGA	I1019Efs*7	pathogenic
17	43091715	G	GA	BRCA1	NC_000017.11:g.43091715_43091716insA	NM_007294.4:c.3815_3816insT	Q1273Pfs*14	pathogenic
17	43092623	TAT	AG	BRCA1	NC_000017.11:g.43092623_43092625delinsAG	NM_007294.4:c.2906_2908delinsCT	N969Tfs*31	pathogenic
17	43094735	CAG	C	BRCA1	NC_000017.11:g.43094736_43094737del	NM_007294.4:c.794_795del	S265Cfs*21	pathogenic
17	43094651	TAGTGAGTAATAAACTGCTGTTCTCATGCTGTA	T	BRCA1	NC_000017.11:g.43094652_43094683del	NM_007294.4:c.848_879del	L283*	pathogenic
17	43092961	A	T	BRCA1	NC_000017.11:g.43092961A>T	NM_007294.4:c.2570T>A	L857*	pathogenic
17	43093718	CT	C	BRCA1	NC_000017.11:g.43093719del	NM_007294.4:c.1812del	A605Hfs*7	pathogenic
17	43093530	T	C	BRCA1	NC_000017.11:g.43093530T>C	NM_007294.4:c.2001A>G	Q667=	likely_benign
17	43092836	CT	C	BRCA1	NC_000017.11:g.43092837del	NM_007294.4:c.2694del	V899Sfs*101	pathogenic
17	43087455	G	A	BRCA1	NC_000017.11:g.43087455G>A	NM_007294.4:c.4185+3489C>T	?	benign
17	43051088	A	T	BRCA1	NC_000017.11:g.43051088A>T	NM_007294.4:c.5307T>A	Y1769*	pathogenic
17	43093094	C	A	BRCA1	NC_000017.11:g.43093094C>A	NM_007294.4:c.2437G>T	G813*	pathogenic
17	43045734	G	A	BRCA1	NC_000017.11:g.43045734G>A	NM_007294.4:c.5536C>T	Q1846*	pathogenic
17	43094522	C	CT	BRCA1	NC_000017.11:g.43094523dup	NM_007294.4:c.1008dup	E337Rfs*9	pathogenic
17	43092004	AC	A	BRCA1	NC_000017.11:g.43092005del	NM_007294.4:c.3526del	V1176Ffs*34	pathogenic
17	43092511	G	C	BRCA1	NC_000017.11:g.43092511G>C	NM_007294.4:c.3020C>G	S1007*	pathogenic
17	43074396	T	TGG	BRCA1	NC_000017.11:g.43074396_43074397insGG	NM_007294.4:c.4609_4610insCC	Q1537Pfs*12	pathogenic
17	43094254	GA	G	BRCA1	NC_000017.11:g.43094255del	NM_007294.4:c.1276del	S426Qfs*4	pathogenic
17	43091437	AAG	A	BRCA1	NC_000017.11:g.43091438_43091439del	NM_007294.4:c.4092_4093del	L1365Rfs*2	pathogenic
17	43092131	C	A	BRCA1	NC_000017.11:g.43092131C>A	NM_007294.4:c.3400G>T	E1134*	pathogenic
17	43110084	C	T	BRCA1	NC_000017.11:g.43110084C>T	NM_007294.4:c.135-3551G>A	?	benign
17	43094312	CATTTGATTCAGACTCCCCATCATGTGAGTCATCAGAACCTAACA	C	BRCA1	NC_000017.11:g.43094313_43094356del	NM_007294.4:c.1175_1218del	L392Rfs*5	pathogenic
17	43099790	C	CA	BRCA1	NC_000017.11:g.43099791dup	NM_007294.4:c.531dup	V178Cfs*4	pathogenic
17	43104136	C	T	BRCA1	NC_000017.11:g.43104136C>T	NM_007294.4:c.427G>A	E143K	benign
17	43104233	C	CT	BRCA1	NC_000017.11:g.43104234dup	NM_007294.4:c.329dup	E111Gfs*3	pathogenic
17	43076597	T	A	BRCA1	NC_000017.11:g.43076597T>A	NM_007294.4:c.4375A>T	K1459*	pathogenic
17	43093257	C	CA	BRCA1	NC_000017.11:g.43093258dup	NM_007294.4:c.2273dup	L758Ffs*4	pathogenic
17	43099815	C	T	BRCA1	NC_000017.11:g.43099815C>T	NM_007294.4:c.507G>A	Q169=	likely_benign
17	43070968	CTT	C	BRCA1	NC_000017.11:g.43070969_43070970del	NM_007294.4:c.4944_4945del	R1649Nfs*29	pathogenic
17	43093690	TTC	T	BRCA1	NC_000017.11:g.43093691_43093692del	NM_007294.4:c.1839_1840del	K614Vfs*10	pathogenic
17	43063360	AGACTG	A	BRCA1	NC_000017.11:g.43063361_43063365del	NM_007294.4:c.5161_5165del	Q1721Yfs*2	pathogenic
17	43092731	GA	G	BRCA1	NC_000017.11:g.43092732del	NM_007294.4:c.2799del	Q934Rfs*66	pathogenic
17	43057117	C	T	BRCA1	NC_000017.11:g.43057117C>T	NM_007294.4:c.5212G>A	G1738R	pathogenic
17	43093091	G	A	BRCA1	NC_000017.11:g.43093091G>A	NM_007294.4:c.2440C>T	L814=	likely_benign
17	43071010	TC	T	BRCA1	NC_000017.11:g.43071011del	NM_007294.4:c.4903del	E1635Rfs*5	pathogenic
17	43091771	TA	T	BRCA1	NC_000017.11:g.43091772del	NM_007294.4:c.3759del	K1254Rfs*10	pathogenic
17	43093043	T	TAGGGG	BRCA1	NC_000017.11:g.43093043_43093044insAGGGG	NM_007294.4:c.2487_2488insCCCCT	K830Pfs*18	pathogenic
17	43093213	GGTACCAA	G	BRCA1	NC_000017.11:g.43093214_43093220del	NM_007294.4:c.2311_2317del	P773Lfs*17	pathogenic
17	43057081	T	TGA	BRCA1	NC_000017.11:g.43057081_43057082insGA	NM_007294.4:c.5247_5248insTC	K1750Sfs*16	pathogenic
17	43094580	T	C	BRCA1	NC_000017.11:g.43094580T>C	NM_007294.4:c.951A>G	Q317=	likely_benign
17	43093171	T	TC	BRCA1	NC_000017.11:g.43093172dup	NM_007294.4:c.2359dup	E787Gfs*3	pathogenic
17	43094513	C	CG	BRCA1	NC_000017.11:g.43094513_43094514insG	NM_007294.4:c.1017_1018insC	V340Rfs*6	pathogenic
17	43093838	C	A	BRCA1	NC_000017.11:g.43093838C>A	NM_007294.4:c.1693G>T	E565*	pathogenic
17	43092292	A	T	BRCA1	NC_000017.11:g.43092292A>T	NM_007294.4:c.3239T>A	L1080*	pathogenic
17	43091966	T	TC	BRCA1	NC_000017.11:g.43091967dup	NM_007294.4:c.3564dup	S1189Efs*3	pathogenic
17	43095913	A	G	BRCA1	NC_000017.11:g.43095913A>G	NM_007294.4:c.603T>C	D201=	likely_benign
17	43082563	TG	T	BRCA1	NC_000017.11:g.43082564del	NM_007294.4:c.4197del	M1400Cfs*5	pathogenic
17	43092844	C	CT	BRCA1	NC_000017.11:g.43092845dup	NM_007294.4:c.2686dup	S896Kfs*7	pathogenic
17	43049140	G	T	BRCA1	NC_000017.11:g.43049140G>T	NM_007294.4:c.5387C>A	S1796*	pathogenic
17	43092856	A	C	BRCA1	NC_000017.11:g.43092856A>C	NM_007294.4:c.2675T>G	L892*	pathogenic
17	43057126	CA	C	BRCA1	NC_000017.11:g.43057127del	NM_007294.4:c.5202del	F1734Lfs*31	pathogenic
17	43092619	T	C	BRCA1	NC_000017.11:g.43092619T>C	NM_007294.4:c.2912A>G	H971R	benign
17	43121231	C	T	BRCA1	NC_000017.11:g.43121231C>T	NM_007294.4:c.80+2786G>A	?	benign
17	43048506	TTC	T	BRCA1	NC_000017.11:g.43048507_43048508del	NM_007294.4:c.5406+613_5406+614del	-	benign
17	43092754	G	GTA	BRCA1	NC_000017.11:g.43092754_43092755insTA	NM_007294.4:c.2776_2777insTA	T926Ifs*75	pathogenic
17	43093913	C	A	BRCA1	NC_000017.11:g.43093913C>A	NM_007294.4:c.1618G>T	E540*	pathogenic
17	43124027	A	AC	BRCA1	NC_000017.11:g.43124028dup	NM_007294.4:c.69dup	C24Vfs*17	pathogenic
17	43092468	AC	A	BRCA1	NC_000017.11:g.43092469del	NM_007294.4:c.3062del	S1021Ifs*3	pathogenic
17	43106476	A	T	BRCA1	NC_000017.11:g.43106476A>T	NM_007294.4:c.192T>A	C64*	pathogenic
17	43071012	C	T	BRCA1	NC_000017.11:g.43071012C>T	NM_007294.4:c.4902G>A	R1634=	likely_benign
17	43094562	T	A	BRCA1	NC_000017.11:g.43094562T>A	NM_007294.4:c.969A>T	G323=	likely_benign
17	43094731	G	GA	BRCA1	NC_000017.11:g.43094732dup	NM_007294.4:c.799dup	S267Ffs*20	pathogenic
17	43093405	A	AACT	BRCA1	NC_000017.11:g.43093405_43093406insACT	NM_007294.4:c.2125_2126insAGT	F709*	pathogenic
17	43094393	G	A	BRCA1	NC_000017.11:g.43094393G>A	NM_007294.4:c.1138C>T	Q380*	pathogenic
17	43121078	G	A	BRCA1	NC_000017.11:g.43121078G>A	NM_007294.4:c.80+2939C>T	?	benign
17	43093929	CTGATTTA	C	BRCA1	NC_000017.11:g.43093930_43093936del	NM_007294.4:c.1595_1601del	I532Rfs*12	pathogenic
17	43091769	C	CA	BRCA1	NC_000017.11:g.43091769_43091770insA	NM_007294.4:c.3761_3762insT	K1254Nfs*13	pathogenic
17	43074385	C	A	BRCA1	NC_000017.11:g.43074385C>A	NM_007294.4:c.4621G>T	E1541*	pathogenic
17	43093449	G	A	BRCA1	NC_000017.11:g.43093449G>A	NM_007294.4:c.2082C>T	S694=	benign
17	43094290	TC	T	BRCA1	NC_000017.11:g.43094291del	NM_007294.4:c.1240del	D414Tfs*3	pathogenic
17	43094274	T	A	BRCA1	NC_000017.11:g.43094274T>A	NM_007294.4:c.1257A>T	V419=	likely_benign
17	43082450	A	G	BRCA1	NC_000017.11:g.43082450A>G	NM_007294.4:c.4311T>C	S1437=	likely_benign
17	43091783	CGGTAGCAACGGTGCTATGCCTAGTAGACTGAGAA	C	BRCA1	NC_000017.11:g.43091784_43091817del	NM_007294.4:c.3714_3747del	Q1240Vfs*13	pathogenic
17	43091621	C	CCA	BRCA1	NC_000017.11:g.43091622_43091623dup	NM_007294.4:c.3908_3909dup	E1304Wfs*4	pathogenic
17	43093650	G	A	BRCA1	NC_000017.11:g.43093650G>A	NM_007294.4:c.1881C>T	V627=	likely_benign
17	43074420	ATGAGCTCCTCT	A	BRCA1	NC_000017.11:g.43074421_43074431del	NM_007294.4:c.4575_4585del	Q1525Hfs*2	pathogenic
17	43108335	C	CA	BRCA1	NC_000017.11:g.43108336dup	NM_007294.4:c.135-1803dup	?	benign
17	43063345	TTTTC	T	BRCA1	NC_000017.11:g.43063346_43063349del	NM_007294.4:c.5177_5180del	R1726Kfs*3	pathogenic
17	43057127	A	AG	BRCA1	NC_000017.11:g.43057127_43057128insG	NM_007294.4:c.5201_5202insC	E1735*	pathogenic
17	43094426	C	T	BRCA1	NC_000017.11:g.43094426C>T	NM_007294.4:c.1105G>A	D369N	benign
17	43092197	C	CT	BRCA1	NC_000017.11:g.43092198dup	NM_007294.4:c.3333dup	E1112Rfs*3	pathogenic
17	43047679	G	GTC	BRCA1	NC_000017.11:g.43047679_43047680insTC	NM_007294.4:c.5430_5431insGA	Q1811Dfs*24	pathogenic
17	43082460	C	CT	BRCA1	NC_000017.11:g.43082461dup	NM_007294.4:c.4300dup	S1434Kfs*2	pathogenic
17	43063938	C	T	BRCA1	NC_000017.11:g.43063938C>T	NM_007294.4:c.5088G>A	V1696=	likely_benign
17	43091800	T	TCCTAGTAGACTGAGAAGGTATATTGTTTACTTTACCAAATAACAAGTGTC	BRCA1	NC_000017.11:g.43091800_43091801insCCTAGTAGACTGAGAAGGTATATTGTTTACTTTACCAAATAACAAGTGTC	NM_007294.4:c.3730_3731insGACACTTGTTATTTGGTAAAGTAAACAATATACCTTCTCAGTCTACTAGG	H1244Rfs*37	pathogenic
17	43124026	C	CGACA	BRCA1	NC_000017.11:g.43124026_43124027insGACA	NM_007294.4:c.70_71insTGTC	C24Lfs*18	pathogenic
17	43076559	GC	G	BRCA1	NC_000017.11:g.43076560del	NM_007294.4:c.4412del	G1471Afs*34	pathogenic
17	43076474	T	C	BRCA1	NC_000017.11:g.43076474T>C	NM_007294.4:c.4484+14A>G	?	benign
17	43092234	AG	A	BRCA1	NC_000017.11:g.43092235del	NM_007294.4:c.3296del	P1099Lfs*10	pathogenic
17	43091600	TTGTA	T	BRCA1	NC_000017.11:g.43091601_43091604del	NM_007294.4:c.3927_3930del	N1309Kfs*8	pathogenic
17	43045766	CG	C	BRCA1	NC_000017.11:g.43045767del	NM_007294.4:c.5503del	R1835Efs*8	pathogenic
17	43098204	AT	A	BRCA1	NC_000017.11:g.43098205del	NM_007294.4:c.548-916del	?	benign
17	43063949	CA	C	BRCA1	NC_000017.11:g.43063950del	NM_007294.4:c.5076del	D1692Efs*10	pathogenic
17	43074500	T	C	BRCA1	NC_000017.11:g.43074500T>C	NM_007294.4:c.4506A>G	P1502=	likely_benign
17	43093341	TTCTTC	T	BRCA1	NC_000017.11:g.43093342_43093346del	NM_007294.4:c.2185_2189del	E729Kfs*9	pathogenic
17	43104936	CT	C	BRCA1	NC_000017.11:g.43104937del	NM_007294.4:c.232del	R78Dfs*10	pathogenic
17	43067641	TA	T	BRCA1	NC_000017.11:g.43067642del	NM_007294.4:c.5040del	T1681Lfs*9	pathogenic
17	43071173	C	A	BRCA1	NC_000017.11:g.43071173C>A	NM_007294.4:c.4741G>T	E1581*	pathogenic
17	43115758	AG	A	BRCA1	NC_000017.11:g.43115759del	NM_007294.4:c.101del	P34Lfs*16	pathogenic
17	43081753	T	C	BRCA1	NC_000017.11:g.43081753T>C	NM_007294.4:c.4357+651A>G	?	benign
17	43106479	TAA	T	BRCA1	NC_000017.11:g.43106480_43106481del	NM_007294.4:c.187_188del	L63Mfs*2	pathogenic
17	43092540	A	ATT	BRCA1	NC_000017.11:g.43092541_43092542dup	NM_007294.4:c.2989_2990dup	N997Kfs*4	pathogenic
17	43063359	T	AAA	BRCA1	NC_000017.11:g.43063359delinsAAA	NM_007294.4:c.5167delinsTTT	I1723Ffs*8	pathogenic
17	43094122	CTT	C	BRCA1	NC_000017.11:g.43094123_43094124del	NM_007294.4:c.1407_1408del	S470Pfs*9	pathogenic
17	43124055	G	A	BRCA1	NC_000017.11:g.43124055G>A	NM_007294.4:c.42C>T	V14=	likely_benign
17	43093329	TTTCTC	T	BRCA1	NC_000017.11:g.43093330_43093334del	NM_007294.4:c.2197_2201del	E733Tfs*5	pathogenic
17	43045721	AG	A	BRCA1	NC_000017.11:g.43045722del	NM_007294.4:c.5548del	L1850Wfs*5	pathogenic
17	43092862	C	A	BRCA1	NC_000017.11:g.43092862C>A	NM_007294.4:c.2669G>T	G890V	benign
17	43061979	C	T	BRCA1	NC_000017.11:g.43061979C>T	NM_007294.4:c.5193+1354G>A	?	benign
17	43076488	CTT	C	BRCA1	NC_000017.11:g.43076489_43076490del	NM_007294.4:c.4482_4483del	R1495Vfs*5	pathogenic
17	43074434	A	AGG	BRCA1	NC_000017.11:g.43074434_43074435insGG	NM_007294.4:c.4571_4572insCC	Q1525Lfs*24	pathogenic
17	43091918	CT	C	BRCA1	NC_000017.11:g.43091919del	NM_007294.4:c.3612del	A1206Pfs*4	pathogenic
17	43076602	G	C	BRCA1	NC_000017.11:g.43076602G>C	NM_007294.4:c.4370C>G	S1457*	pathogenic
17	43097258	C	T	BRCA1	NC_000017.11:g.43097258C>T	NM_007294.4:c.579G>A	K193=	likely_benign
17	43094325	C	CT	BRCA1	NC_000017.11:g.43094326dup	NM_007294.4:c.1205dup	S403Vfs*2	pathogenic
17	43091944	G	GT	BRCA1	NC_000017.11:g.43091945dup	NM_007294.4:c.3586dup	T1196Nfs*23	pathogenic
17	43045774	C	CAA	BRCA1	NC_000017.11:g.43045774_43045775insAA	NM_007294.4:c.5495_5496insTT	V1833Wfs*2	pathogenic
17	43104260	A	G	BRCA1	NC_000017.11:g.43104260A>G	NM_007294.4:c.303T>C	Y101=	likely_benign
17	43094765	T	G	BRCA1	NC_000017.11:g.43094765T>G	NM_007294.4:c.766A>C	R256=	likely_benign
17	43106485	A	AGCGC	BRCA1	NC_000017.11:g.43106485_43106486insGCGC	NM_007294.4:c.182_183insGCGC	C61Wfs*6	pathogenic
17	43092900	AT	A	BRCA1	NC_000017.11:g.43092901del	NM_007294.4:c.2630del	N877Mfs*16	pathogenic
17	43057051	C	T	BRCA1	NC_000017.11:g.43057051C>T	NM_007294.4:c.5277+1G>A	?	pathogenic
17	43091930	CCT	C	BRCA1	NC_000017.11:g.43091931_43091932del	NM_007294.4:c.3599_3600del	Q1200Rfs*18	pathogenic
17	43092049	TC	T	BRCA1	NC_000017.11:g.43092050del	NM_007294.4:c.3481del	E1161Kfs*49	pathogenic
17	43091731	A	C	BRCA1	NC_000017.11:g.43091731A>C	NM_007294.4:c.3800T>G	L1267*	pathogenic
17	43092018	C	T	BRCA1	NC_000017.11:g.43092018C>T	NM_007294.4:c.3513G>A	K1171=	likely_benign
17	43091752	AAATTCTCC	A	BRCA1	NC_000017.11:g.43091753_43091760del	NM_007294.4:c.3771_3778del	E1257Dfs*7	pathogenic
17	43099801	TG	T	BRCA1	NC_000017.11:g.43099802del	NM_007294.4:c.520del	Q174Kfs*60	pathogenic
17	43063909	C	G	BRCA1	NC_000017.11:g.43063909C>G	NM_007294.4:c.5117G>C	G1706A	benign
17	43054080	C	T	BRCA1	NC_000017.11:g.43054080C>T	NM_007294.4:c.5278-2963G>A	?	benign
17	43087963	T	C	BRCA1	NC_000017.11:g.43087963T>C	NM_007294.4:c.4185+2981A>G	?	benign
17	43124025	A	AT	BRCA1	NC_000017.11:g.43124025_43124026insT	NM_007294.4:c.71_72insA	C24*	pathogenic
17	43093567	T	TA	BRCA1	NC_000017.11:g.43093568dup	NM_007294.4:c.1963dup	Y655Lfs*18	pathogenic
17	43051067	G	A	BRCA1	NC_000017.11:g.43051067G>A	NM_007294.4:c.5328C>T	P1776=	likely_benign
17	43059936	T	C	BRCA1	NC_000017.11:g.43059936T>C	NM_007294.4:c.5194-2801A>G	?	benign
17	43067642	AATTAG	A	BRCA1	NC_000017.11:g.43067643_43067647del	NM_007294.4:c.5035_5039del	L1679Yfs*2	pathogenic
17	43074380	A	G	BRCA1	NC_000017.11:g.43074380A>G	NM_007294.4:c.4626T>C	S1542=	likely_benign
17	43067696	C	T	BRCA1	NC_000017.11:g.43067696C>T	NM_007294.4:c.4987-1G>A	?	pathogenic
17	43092134	AG	A	BRCA1	NC_000017.11:g.43092135del	NM_007294.4:c.3396del	L1133*	pathogenic
17	43066699	G	A	BRCA1	NC_000017.11:g.43066699G>A	NM_007294.4:c.5074+909C>T	?	benign
17	43093222	GA	G	BRCA1	NC_000017.11:g.43093223del	NM_007294.4:c.2308del	S770Hfs*22	pathogenic
17	43093316	T	A	BRCA1	NC_000017.11:g.43093316T>A	NM_007294.4:c.2215A>T	K739*	pathogenic
17	43091017	CCA	C	BRCA1	NC_000017.11:g.43091018_43091019del	NM_007294.4:c.4110_4111del	G1371Vfs*2	pathogenic
17	43094236	AGT	TC	BRCA1	NC_000017.11:g.43094236_43094238delinsTC	NM_007294.4:c.1293_1295delinsGA	L432Rfs*9	pathogenic
17	43093299	A	G	BRCA1	NC_000017.11:g.43093299A>G	NM_007294.4:c.2232T>C	A744=	benign
17	43093454	C	TAT	BRCA1	NC_000017.11:g.43093454delinsTAT	NM_007294.4:c.2077delinsATA	D693Ifs*9	pathogenic
17	43094381	CAT	C	BRCA1	NC_000017.11:g.43094382_43094383del	NM_007294.4:c.1148_1149del	N383Rfs*7	pathogenic
17	43067650	TAGTTA	T	BRCA1	NC_000017.11:g.43067651_43067655del	NM_007294.4:c.5027_5031del	L1676*	pathogenic
17	43091837	C	CA	BRCA1	NC_000017.11:g.43091838dup	NM_007294.4:c.3693dup	G1232Wfs*2	pathogenic
17	43091613	CAA	C	BRCA1	NC_000017.11:g.43091614_43091615del	NM_007294.4:c.3916_3917del	L1306Dfs*23	pathogenic
17	43093450	C	CT	BRCA1	NC_000017.11:g.43093451dup	NM_007294.4:c.2080dup	S694Kfs*18	pathogenic
17	43093314	T	C	BRCA1	NC_000017.11:g.43093314T>C	NM_007294.4:c.2217A>G	K739=	likely_benign
17	43124029	T	TG	BRCA1	NC_000017.11:g.43124029_43124030insG	NM_007294.4:c.67_68insC	E23Afs*18	pathogenic
17	43094042	GA	G	BRCA1	NC_000017.11:g.43094043del	NM_007294.4:c.1488del	L498Sfs*5	pathogenic
17	43067645	T	C	BRCA1	NC_000017.11:g.43067645T>C	NM_007294.4:c.5037A>G	L1679=	likely_benign
17	43051098	A	C	BRCA1	NC_000017.11:g.43051098A>C	NM_007294.4:c.5297T>G	I1766S	pathogenic
17	43091980	CCT	C	BRCA1	NC_000017.11:g.43091981_43091982del	NM_007294.4:c.3549_3550del	G1184Rfs*3	pathogenic
17	43093732	ATATT	A	BRCA1	NC_000017.11:g.43093733_43093736del	NM_007294.4:c.1795_1798del	N599Sfs*12	pathogenic
17	43094254	G	C	BRCA1	NC_000017.11:g.43094254G>C	NM_007294.4:c.1277C>G	S426*	pathogenic
17	43092935	G	A	BRCA1	NC_000017.11:g.43092935G>A	NM_007294.4:c.2596C>T	R866C	benign
17	43092963	A	G	BRCA1	NC_000017.11:g.43092963A>G	NM_007294.4:c.2568T>C	Y856=	likely_benign
17	43092968	G	A	BRCA1	NC_000017.11:g.43092968G>A	NM_007294.4:c.2563C>T	Q855*	pathogenic
17	43106467	A	G	BRCA1	NC_000017.11:g.43106467A>G	NM_007294.4:c.201T>C	D67=	benign
17	43094815	TG	T	BRCA1	NC_000017.11:g.43094816del	NM_007294.4:c.715del	H239Ifs*8	pathogenic
17	43094472	C	T	BRCA1	NC_000017.11:g.43094472C>T	NM_007294.4:c.1059G>A	W353*	pathogenic
17	43063947	AGCAT	A	BRCA1	NC_000017.11:g.43063948_43063951del	NM_007294.4:c.5075_5078del	D1692Vfs*9	pathogenic
17	43066555	T	C	BRCA1	NC_000017.11:g.43066555T>C	NM_007294.4:c.5074+1053A>G	?	benign
17	43071163	GCT	G	BRCA1	NC_000017.11:g.43071164_43071165del	NM_007294.4:c.4749_4750del	R1583Sfs*38	pathogenic
17	43093745	GTTCCATA	G	BRCA1	NC_000017.11:g.43093746_43093752del	NM_007294.4:c.1779_1785del	M594Sfs*3	pathogenic
17	43092197	CT	C	BRCA1	NC_000017.11:g.43092198del	NM_007294.4:c.3333del	E1112Nfs*5	pathogenic
17	43091710	AC	A	BRCA1	NC_000017.11:g.43091711del	NM_007294.4:c.3820del	V1274*	pathogenic
17	43092938	T	A	BRCA1	NC_000017.11:g.43092938T>A	NM_007294.4:c.2593A>T	K865*	pathogenic
17	43094635	A	ACATT	BRCA1	NC_000017.11:g.43094636_43094639dup	NM_007294.4:c.892_895dup	V299Efs*6	pathogenic
17	43057069	CT	C	BRCA1	NC_000017.11:g.43057070del	NM_007294.4:c.5259del	E1754Nfs*11	pathogenic
17	43124062	T	TG	BRCA1	NC_000017.11:g.43124063dup	NM_007294.4:c.34dup	Q12Pfs*5	pathogenic
17	43092826	TC	T	BRCA1	NC_000017.11:g.43092827del	NM_007294.4:c.2704del	E902Nfs*98	pathogenic
17	43099864	CTG	C	BRCA1	NC_000017.11:g.43099865_43099866del	NM_007294.4:c.456_457del	S153Cfs*5	pathogenic
17	43091893	TC	T	BRCA1	NC_000017.11:g.43091894del	NM_007294.4:c.3637del	E1213Kfs*22	pathogenic
17	43094542	TCATTA	T	BRCA1	NC_000017.11:g.43094543_43094547del	NM_007294.4:c.984_988del	C328*	pathogenic
17	43122889	G	A	BRCA1	NC_000017.11:g.43122889G>A	NM_007294.4:c.80+1128C>T	?	benign
17	43067672	T	C	BRCA1	NC_000017.11:g.43067672T>C	NM_007294.4:c.5010A>G	R1670=	likely_benign
17	43093912	TC	T	BRCA1	NC_000017.11:g.43093913del	NM_007294.4:c.1618del	E540Sfs*6	pathogenic
17	43092201	C	CT	BRCA1	NC_000017.11:g.43092202dup	NM_007294.4:c.3329dup	Q1111Afs*4	pathogenic
17	43093734	A	G	BRCA1	NC_000017.11:g.43093734A>G	NM_007294.4:c.1797T>C	N599=	likely_benign
17	43094351	C	CA	BRCA1	NC_000017.11:g.43094351_43094352insA	NM_007294.4:c.1179_1180insT	G394Wfs*3	pathogenic
17	43058585	T	C	BRCA1	NC_000017.11:g.43058585T>C	NM_007294.4:c.5194-1450A>G	?	benign
17	43093536	GT	G	BRCA1	NC_000017.11:g.43093537del	NM_007294.4:c.1994del	N665Tfs*36	pathogenic
17	43094152	A	AT	BRCA1	NC_000017.11:g.43094153dup	NM_007294.4:c.1378dup	I460Nfs*20	pathogenic
17	43093683	AG	A	BRCA1	NC_000017.11:g.43093684del	NM_007294.4:c.1847del	S616Lfs*10	pathogenic
17	43090999	CTT	C	BRCA1	NC_000017.11:g.43091000_43091001del	NM_007294.4:c.4128_4129del	S1377Rfs*3	pathogenic
17	43094031	AT	A	BRCA1	NC_000017.11:g.43094032del	NM_007294.4:c.1499del	N500Ifs*3	pathogenic
17	43124044	A	G	BRCA1	NC_000017.11:g.43124044A>G	NM_007294.4:c.53T>C	M18T	pathogenic
17	43094316	TGATTCAGACTCCCCATCATGTGAGTCATCAGAACCTAACA	T	BRCA1	NC_000017.11:g.43094317_43094356del	NM_007294.4:c.1175_1214del	L392Qfs*5	pathogenic
17	43091896	GAGGA	G	BRCA1	NC_000017.11:g.43091897_43091900del	NM_007294.4:c.3631_3634del	S1211Qfs*23	pathogenic
17	43093119	C	T	BRCA1	NC_000017.11:g.43093119C>T	NM_007294.4:c.2412G>A	Q804=	likely_benign
17	43045702	G	T	BRCA1	NC_000017.11:g.43045702G>T	NM_007294.4:c.5568C>A	P1856=	likely_benign
17	43115730	A	T	BRCA1	NC_000017.11:g.43115730A>T	NM_007294.4:c.130T>A	C44S	pathogenic
17	43092142	G	C	BRCA1	NC_000017.11:g.43092142G>C	NM_007294.4:c.3389C>G	S1130*	pathogenic
17	43112738	TGAAAC	T	BRCA1	NC_000017.11:g.43112739_43112743del	NM_007294.4:c.134+2983_134+2987del	?	benign
17	43082566	T	TCC	BRCA1	NC_000017.11:g.43082566_43082567insCC	NM_007294.4:c.4194_4195insGG	T1399Gfs*7	pathogenic
17	43124032	A	G	BRCA1	NC_000017.11:g.43124032A>G	NM_007294.4:c.65T>C	L22S	pathogenic
17	43091736	AT	A	BRCA1	NC_000017.11:g.43091737del	NM_007294.4:c.3794del	N1265Ifs*3	pathogenic
17	43118401	G	C	BRCA1	NC_000017.11:g.43118401G>C	NM_007294.4:c.81-2622C>G	?	benign
17	43087898	AT	A	BRCA1	NC_000017.11:g.43087899del	NM_007294.4:c.4185+3045del	?	benign
17	43094081	C	A	BRCA1	NC_000017.11:g.43094081C>A	NM_007294.4:c.1450G>T	G484*	pathogenic
17	43092129	T	C	BRCA1	NC_000017.11:g.43092129T>C	NM_007294.4:c.3402A>G	E1134=	likely_benign
17	43090999	CT	C	BRCA1	NC_000017.11:g.43091000del	NM_007294.4:c.4129del	S1377Afs*16	pathogenic
17	43092047	CTTCCT	C	BRCA1	NC_000017.11:g.43092048_43092052del	NM_007294.4:c.3479_3483del	K1160Rfs*3	pathogenic
17	43093289	T	TG	BRCA1	NC_000017.11:g.43093290dup	NM_007294.4:c.2241dup	K748Qfs*14	pathogenic
17	43104887	CTGAAAAGCACAAA	C	BRCA1	NC_000017.11:g.43104888_43104900del	NM_007294.4:c.269_281del	I90Sfs*25	pathogenic
17	43073766	A	T	BRCA1	NC_000017.11:g.43073766A>T	NM_007294.4:c.4675+565T>A	?	benign
17	43099856	GTT	G	BRCA1	NC_000017.11:g.43099857_43099858del	NM_007294.4:c.464_465del	Q155Pfs*3	pathogenic
17	43063951	T	A	BRCA1	NC_000017.11:g.43063951T>A	NM_007294.4:c.5075A>T	D1692V	likely_pathogenic
17	43094004	T	C	BRCA1	NC_000017.11:g.43094004T>C	NM_007294.4:c.1527A>G	T509=	likely_benign
17	43093444	GT	G	BRCA1	NC_000017.11:g.43093445del	NM_007294.4:c.2086del	T696Lfs*5	pathogenic
17	43094223	A	G	BRCA1	NC_000017.11:g.43094223A>G	NM_007294.4:c.1308T>C	P436=	likely_benign
17	43092139	TCTGAAATC	T	BRCA1	NC_000017.11:g.43092140_43092147del	NM_007294.4:c.3384_3391del	I1129*	pathogenic
17	43091620	TC	T	BRCA1	NC_000017.11:g.43091621del	NM_007294.4:c.3910del	E1304Kfs*3	pathogenic
17	43071521	G	GAATGTTCACTGTAACAATGCTTGT	BRCA1	NC_000017.11:g.43071521_43071522insAATGTTCACTGTAACAATGCTTGT	NM_007294.4:c.4676-284_4676-283insACAAGCATTGTTACAGTGAACATT	?	benign
17	43092848	G	A	BRCA1	NC_000017.11:g.43092848G>A	NM_007294.4:c.2683C>T	Q895*	pathogenic
17	43094717	C	A	BRCA1	NC_000017.11:g.43094717C>A	NM_007294.4:c.814G>T	E272*	pathogenic
17	43094702	T	TA	BRCA1	NC_000017.11:g.43094702_43094703insA	NM_007294.4:c.828_829insT	N277*	pathogenic
17	43093509	AG	A	BRCA1	NC_000017.11:g.43093510del	NM_007294.4:c.2021del	P674Lfs*27	pathogenic
17	43092264	CA	C	BRCA1	NC_000017.11:g.43092265del	NM_007294.4:c.3266del	L1089Cfs*20	pathogenic
17	43093152	C	CT	BRCA1	NC_000017.11:g.43093153dup	NM_007294.4:c.2378dup	A794Gfs*7	pathogenic
17	43071116	A	G	BRCA1	NC_000017.11:g.43071116A>G	NM_007294.4:c.4798T>C	L1600=	likely_benign
17	43090958	TGTCA	T	BRCA1	NC_000017.11:g.43090959_43090962del	NM_007294.4:c.4167_4170del	S1389Rfs*3	pathogenic
17	43092288	A	G	BRCA1	NC_000017.11:g.43092288A>G	NM_007294.4:c.3243T>C	N1081=	likely_benign
17	43115729	C	A	BRCA1	NC_000017.11:g.43115729C>A	NM_007294.4:c.131G>T	C44F	pathogenic
17	43094569	C	T	BRCA1	NC_000017.11:g.43094569C>T	NM_007294.4:c.962G>A	W321*	pathogenic
17	43057089	T	TG	BRCA1	NC_000017.11:g.43057090dup	NM_007294.4:c.5239dup	Q1747Pfs*83	pathogenic
17	43051118	CT	C	BRCA1	NC_000017.11:g.43051119del	NM_007294.4:c.5278-2del	?	pathogenic
17	43074480	TACC	CTCATCTAATGATGGGCA	BRCA1	NC_000017.11:g.43074480_43074483delinsCTCATCTAATGATGGGCA	NM_007294.4:c.4523_4526delinsTGCCCATCATTAGATGAG	W1508Lfs*6	pathogenic
17	43092741	A	G	BRCA1	NC_000017.11:g.43092741A>G	NM_007294.4:c.2790T>C	P930=	likely_benign
17	43107764	C	T	BRCA1	NC_000017.11:g.43107764C>T	NM_007294.4:c.135-1231G>A	?	benign
17	43091695	GC	G	BRCA1	NC_000017.11:g.43091696del	NM_007294.4:c.3835del	A1279Hfs*28	pathogenic
17	43058379	A	C	BRCA1	NC_000017.11:g.43058379A>C	NM_007294.4:c.5194-1244T>G	?	benign
17	43045720	C	G	BRCA1	NC_000017.11:g.43045720C>G	NM_007294.4:c.5550G>C	L1850=	likely_benign
17	43093193	G	A	BRCA1	NC_000017.11:g.43093193G>A	NM_007294.4:c.2338C>T	Q780*	pathogenic
17	43094135	G	GA	BRCA1	NC_000017.11:g.43094136dup	NM_007294.4:c.1395dup	R466Sfs*14	pathogenic
17	43092804	A	AT	BRCA1	NC_000017.11:g.43092805dup	NM_007294.4:c.2726dup	N909Kfs*6	pathogenic
17	43122547	T	A	BRCA1	NC_000017.11:g.43122547T>A	NM_007294.4:c.80+1470A>T	?	benign
17	43093342	T	TC	BRCA1	NC_000017.11:g.43093343dup	NM_007294.4:c.2188dup	E730Gfs*10	pathogenic
17	43099865	TG	T	BRCA1	NC_000017.11:g.43099866del	NM_007294.4:c.456del	S153Vfs*10	pathogenic
17	43103085	A	G	BRCA1	NC_000017.11:g.43103085A>G	NM_007294.4:c.441+1037T>C	?	benign
17	43074415	CCTTA	C	BRCA1	NC_000017.11:g.43074416_43074419del	NM_007294.4:c.4587_4590del	I1529Mfs*18	pathogenic
17	43094453	ATGGCAGTTTC	A	BRCA1	NC_000017.11:g.43094454_43094463del	NM_007294.4:c.1068_1077del	Q356Hfs*15	pathogenic
17	43071154	G	GT	BRCA1	NC_000017.11:g.43071154_43071155insT	NM_007294.4:c.4759_4760insA	S1587Yfs*35	pathogenic
17	43092662	G	A	BRCA1	NC_000017.11:g.43092662G>A	NM_007294.4:c.2869C>T	Q957*	pathogenic
17	43092897	T	C	BRCA1	NC_000017.11:g.43092897T>C	NM_007294.4:c.2634A>G	A878=	likely_benign
17	43057098	CTT	C	BRCA1	NC_000017.11:g.43057099_43057100del	NM_007294.4:c.5229_5230del	R1744Kfs*85	pathogenic
17	43092918	CGG	C	BRCA1	NC_000017.11:g.43092919_43092920del	NM_007294.4:c.2611_2612del	P871Vfs*31	pathogenic
17	43090947	A	G	BRCA1	NC_000017.11:g.43090947A>G	NM_007294.4:c.4182T>C	T1394=	likely_benign
17	43087610	C	T	BRCA1	NC_000017.11:g.43087610C>T	NM_007294.4:c.4185+3334G>A	?	benign
17	43049140	G	GA	BRCA1	NC_000017.11:g.43049141dup	NM_007294.4:c.5386dup	S1796Ffs*34	pathogenic
17	43059351	C	A	BRCA1	NC_000017.11:g.43059351C>A	NM_007294.4:c.5194-2216G>T	?	benign
17	43093461	TTTAC	T	BRCA1	NC_000017.11:g.43093462_43093465del	NM_007294.4:c.2066_2069del	S689Kfs*11	pathogenic
17	43093410	AC	A	BRCA1	NC_000017.11:g.43093411del	NM_007294.4:c.2120del	G707Vfs*29	pathogenic
17	43091781	C	T	BRCA1	NC_000017.11:g.43091781C>T	NM_007294.4:c.3750G>A	E1250=	likely_benign
17	43092043	GTATCTTCCTT	G	BRCA1	NC_000017.11:g.43092044_43092053del	NM_007294.4:c.3478_3487del	K1160Lfs*47	pathogenic
17	43091011	T	TAA	BRCA1	NC_000017.11:g.43091011_43091012insAA	NM_007294.4:c.4117_4118insTT	E1373Vfs*21	pathogenic
17	43091552	G	A	BRCA1	NC_000017.11:g.43091552G>A	NM_007294.4:c.3979C>T	Q1327*	pathogenic
17	43093448	C	A	BRCA1	NC_000017.11:g.43093448C>A	NM_007294.4:c.2083G>T	D695Y	benign
17	43092551	ATTTAGTT	A	BRCA1	NC_000017.11:g.43092552_43092558del	NM_007294.4:c.2973_2979del	K991Nfs*7	pathogenic
17	43093316	T	TAA	BRCA1	NC_000017.11:g.43093317_43093318dup	NM_007294.4:c.2213_2214dup	K739Lfs*15	pathogenic
17	43091931	C	A	BRCA1	NC_000017.11:g.43091931C>A	NM_007294.4:c.3600G>T	Q1200H	benign
17	43080359	C	A	BRCA1	NC_000017.11:g.43080359C>A	NM_007294.4:c.4357+2045G>T	?	benign
17	43094398	CTGCTATTT	C	BRCA1	NC_000017.11:g.43094399_43094406del	NM_007294.4:c.1125_1132del	N376Hfs*5	pathogenic
17	43092654	TCTGAA	T	BRCA1	NC_000017.11:g.43092655_43092659del	NM_007294.4:c.2872_2876del	F958Rfs*11	pathogenic
17	43045779	GT	G	BRCA1	NC_000017.11:g.43045780del	NM_007294.4:c.5490del	P1831Lfs*3	pathogenic
17	43091571	AG	A	BRCA1	NC_000017.11:g.43091572del	NM_007294.4:c.3959del	S1320Ffs*5	pathogenic
17	43092600	T	C	BRCA1	NC_000017.11:g.43092600T>C	NM_007294.4:c.2931A>G	P977=	likely_benign
17	43093950	CTT	C	BRCA1	NC_000017.11:g.43093951_43093952del	NM_007294.4:c.1579_1580del	K527Dfs*3	pathogenic
17	43063333	C	T	BRCA1	NC_000017.11:g.43063333C>T	NM_007294.4:c.5193G>A	E1731=	likely_benign
17	43094713	G	GGCTCCACATGC	BRCA1	NC_000017.11:g.43094714_43094724dup	NM_007294.4:c.807_817dup	P273Rfs*29	pathogenic
17	43077760	G	GT	BRCA1	NC_000017.11:g.43077761dup	NM_007294.4:c.4358-1147dup	?	benign
17	43091881	G	GT	BRCA1	NC_000017.11:g.43091881_43091882insT	NM_007294.4:c.3649_3650insA	S1217Yfs*2	pathogenic
17	43087611	A	G	BRCA1	NC_000017.11:g.43087611A>G	NM_007294.4:c.4185+3333T>C	?	benign
17	43093216	A	G	BRCA1	NC_000017.11:g.43093216A>G	NM_007294.4:c.2315T>C	V772A	benign
17	43094068	G	GT	BRCA1	NC_000017.11:g.43094069dup	NM_007294.4:c.1462dup	T488Nfs*2	pathogenic
17	43090934	C	G	BRCA1	NC_000017.11:g.43090934C>G	NM_007294.4:c.4185+10G>C	?	benign
17	43093110	T	C	BRCA1	NC_000017.11:g.43093110T>C	NM_007294.4:c.2421A>G	A807=	likely_benign
17	43044391	G	A	BRCA1	NC_000017.11:g.43044391G>A	NM_007294.4:c.*1287C>T	?	benign
17	43093919	GGTTA	G	BRCA1	NC_000017.11:g.43093920_43093923del	NM_007294.4:c.1608_1611del	N537Kfs*8	pathogenic
17	43082542	GC	G	BRCA1	NC_000017.11:g.43082543del	NM_007294.4:c.4218del	K1406Nfs*9	pathogenic
17	43092982	CT	C	BRCA1	NC_000017.11:g.43092983del	NM_007294.4:c.2548del	S850Vfs*43	pathogenic
17	43093814	A	AT	BRCA1	NC_000017.11:g.43093815dup	NM_007294.4:c.1716dup	S573Ifs*13	pathogenic
17	43093373	C	CT	BRCA1	NC_000017.11:g.43093374dup	NM_007294.4:c.2157dup	E720Rfs*6	pathogenic
17	43071076	CT	GGC	BRCA1	NC_000017.11:g.43071076_43071077delinsGGC	NM_007294.4:c.4837_4838delinsGCC	S1613Afs*9	pathogenic
17	43082418	C	CT	BRCA1	NC_000017.11:g.43082419dup	NM_007294.4:c.4342dup	S1448Kfs*14	pathogenic
17	43094698	G	GT	BRCA1	NC_000017.11:g.43094699dup	NM_007294.4:c.832dup	T278Nfs*9	pathogenic
17	43093024	TC	T	BRCA1	NC_000017.11:g.43093025del	NM_007294.4:c.2506del	E836Kfs*10	pathogenic
17	43092627	T	TGA	BRCA1	NC_000017.11:g.43092627_43092628insGA	NM_007294.4:c.2903_2904insTC	N969Qfs*32	pathogenic
17	43047713	C	T	BRCA1	NC_000017.11:g.43047713C>T	NM_007294.4:c.5407-10G>A	?	likely_pathogenic
17	43094020	CGCTTT	C	BRCA1	NC_000017.11:g.43094021_43094025del	NM_007294.4:c.1506_1510del	K503*	pathogenic
17	43124476	G	A	BRCA1	NC_000017.11:g.43124476G>A	NM_007294.4:c.-19-361C>T	?	benign
17	43091495	CT	C	BRCA1	NC_000017.11:g.43091496del	NM_007294.4:c.4035del	E1346Kfs*20	pathogenic
17	43091772	A	C	BRCA1	NC_000017.11:g.43091772A>C	NM_007294.4:c.3759T>G	S1253=	likely_benign
17	43111828	A	C	BRCA1	NC_000017.11:g.43111828A>C	NM_007294.4:c.134+3898T>G	?	benign
17	43093571	T	A	BRCA1	NC_000017.11:g.43093571T>A	NM_007294.4:c.1960A>T	K654*	pathogenic
17	43094061	T	C	BRCA1	NC_000017.11:g.43094061T>C	NM_007294.4:c.1470A>G	P490=	likely_benign
17	43093755	G	A	BRCA1	NC_000017.11:g.43093755G>A	NM_007294.4:c.1776C>T	S592=	likely_benign
17	43092042	AGTATCTTCCT	A	BRCA1	NC_000017.11:g.43092043_43092052del	NM_007294.4:c.3479_3488del	K1160Ifs*47	pathogenic
17	43123134	G	C	BRCA1	NC_000017.11:g.43123134G>C	NM_007294.4:c.80+883C>G	?	benign
17	43094449	G	GT	BRCA1	NC_000017.11:g.43094449_43094450insT	NM_007294.4:c.1081_1082insA	S361Yfs*5	pathogenic
17	43094002	G	C	BRCA1	NC_000017.11:g.43094002G>C	NM_007294.4:c.1529C>G	S510*	pathogenic
17	43100617	TAAC	T	BRCA1	NC_000017.11:g.43100618_43100620del	NM_007294.4:c.442-740_442-738del	?	benign
17	43063333	CTCATTCAGCATTTT	C	BRCA1	NC_000017.11:g.43063334_43063347del	NM_007294.4:c.5179_5192del	K1727Afs*2	pathogenic
17	43070959	A	G	BRCA1	NC_000017.11:g.43070959A>G	NM_007294.4:c.4955T>C	M1652T	benign
17	43093054	G	T	BRCA1	NC_000017.11:g.43093054G>T	NM_007294.4:c.2477C>A	T826K	benign
17	43091511	C	CAA	BRCA1	NC_000017.11:g.43091512_43091513dup	NM_007294.4:c.4018_4019dup	L1340Ffs*27	pathogenic
17	43045756	C	A	BRCA1	NC_000017.11:g.43045756C>A	NM_007294.4:c.5514G>T	V1838=	likely_benign
17	43087474	T	C	BRCA1	NC_000017.11:g.43087474T>C	NM_007294.4:c.4185+3470A>G	?	benign
17	43124028	C	T	BRCA1	NC_000017.11:g.43124028C>T	NM_007294.4:c.69G>A	E23=	likely_benign
17	43091678	G	GGT	BRCA1	NC_000017.11:g.43091679_43091680dup	NM_007294.4:c.3851_3852dup	L1285Tfs*23	pathogenic
17	43092063	A	G	BRCA1	NC_000017.11:g.43092063A>G	NM_007294.4:c.3468T>C	D1156=	likely_benign
17	43094466	C	T	BRCA1	NC_000017.11:g.43094466C>T	NM_007294.4:c.1065G>A	K355=	likely_benign
17	43104909	A	T	BRCA1	NC_000017.11:g.43104909A>T	NM_007294.4:c.260T>A	L87*	pathogenic
17	43092089	C	A	BRCA1	NC_000017.11:g.43092089C>A	NM_007294.4:c.3442G>T	E1148*	pathogenic
17	43090990	TCA	T	BRCA1	NC_000017.11:g.43090991_43090992del	NM_007294.4:c.4137_4138del	E1380Rfs*10	pathogenic
17	43115615	G	A	BRCA1	NC_000017.11:g.43115615G>A	NM_007294.4:c.134+111C>T	?	benign
17	43079204	A	C	BRCA1	NC_000017.11:g.43079204A>C	NM_007294.4:c.4358-2590T>G	?	benign
17	43093494	C	GG	BRCA1	NC_000017.11:g.43093494delinsGG	NM_007294.4:c.2037delinsCC	K679Nfs*4	pathogenic
17	43092110	G	GA	BRCA1	NC_000017.11:g.43092111dup	NM_007294.4:c.3420dup	H1141Sfs*8	pathogenic
17	43074414	AC	A	BRCA1	NC_000017.11:g.43074415del	NM_007294.4:c.4591del	V1531Lfs*17	pathogenic
17	43063343	ATT	A	BRCA1	NC_000017.11:g.43063344_43063345del	NM_007294.4:c.5181_5182del	K1727Nfs*4	pathogenic
17	43078965	C	T	BRCA1	NC_000017.11:g.43078965C>T	NM_007294.4:c.4358-2351G>A	?	benign
17	43092627	T	TG	BRCA1	NC_000017.11:g.43092628dup	NM_007294.4:c.2903dup	N969Kfs*2	pathogenic
17	43094139	G	GC	BRCA1	NC_000017.11:g.43094139_43094140insC	NM_007294.4:c.1391_1392insG	Y465Lfs*15	pathogenic
17	43086485	A	G	BRCA1	NC_000017.11:g.43086485A>G	NM_007294.4:c.4186-3910T>C	?	benign
17	43093073	T	C	BRCA1	NC_000017.11:g.43093073T>C	NM_007294.4:c.2458A>G	K820E	benign
17	43093369	A	AC	BRCA1	NC_000017.11:g.43093369_43093370insC	NM_007294.4:c.2161_2162insG	F721Cfs*5	pathogenic
17	43082491	G	A	BRCA1	NC_000017.11:g.43082491G>A	NM_007294.4:c.4270C>T	Q1424*	pathogenic
17	43093203	A	AT	BRCA1	NC_000017.11:g.43093204dup	NM_007294.4:c.2327dup	D776Efs*14	pathogenic
17	43045754	A	G	BRCA1	NC_000017.11:g.43045754A>G	NM_007294.4:c.5516T>C	L1839S	pathogenic
17	43092760	TTAAC	T	BRCA1	NC_000017.11:g.43092761_43092764del	NM_007294.4:c.2767_2770del	V923Ifs*76	pathogenic
17	43115754	AGACAG	A	BRCA1	NC_000017.11:g.43115755_43115759del	NM_007294.4:c.101_105del	P34Lfs*5	pathogenic
17	43106528	C	CA	BRCA1	NC_000017.11:g.43106529dup	NM_007294.4:c.139dup	C47Lfs*19	pathogenic
17	43092039	ACTAGTAT	A	BRCA1	NC_000017.11:g.43092040_43092046del	NM_007294.4:c.3485_3491del	D1162Vfs*46	pathogenic
17	43093144	G	GT	BRCA1	NC_000017.11:g.43093145dup	NM_007294.4:c.2386dup	T796Nfs*5	pathogenic
17	43090962	A	ACT	BRCA1	NC_000017.11:g.43090963_43090964dup	NM_007294.4:c.4165_4166dup	S1389Rfs*5	pathogenic
17	43094198	C	A	BRCA1	NC_000017.11:g.43094198C>A	NM_007294.4:c.1333G>T	E445*	pathogenic
17	43093578	C	CT	BRCA1	NC_000017.11:g.43093579dup	NM_007294.4:c.1952dup	K652Efs*21	pathogenic
17	43063940	CAA	C	BRCA1	NC_000017.11:g.43063941_43063942del	NM_007294.4:c.5084_5085del	F1695Cfs*3	pathogenic
17	43124056	AC	A	BRCA1	NC_000017.11:g.43124057del	NM_007294.4:c.40del	V14Sfs*9	pathogenic
17	43091462	C	A	BRCA1	NC_000017.11:g.43091462C>A	NM_007294.4:c.4069G>T	E1357*	pathogenic
17	43063927	GT	G	BRCA1	NC_000017.11:g.43063928del	NM_007294.4:c.5098del	T1700Hfs*2	pathogenic
17	43051071	A	T	BRCA1	NC_000017.11:g.43051071A>T	NM_007294.4:c.5324T>A	M1775K	pathogenic
17	43094706	G	GCCACATGGCT	BRCA1	NC_000017.11:g.43094707_43094716dup	NM_007294.4:c.815_824dup	T276Afs*14	pathogenic
17	43091622	C	CA	BRCA1	NC_000017.11:g.43091623dup	NM_007294.4:c.3908dup	L1303Ffs*27	pathogenic
17	43091902	TC	T	BRCA1	NC_000017.11:g.43091903del	NM_007294.4:c.3628del	E1210Sfs*25	pathogenic
17	43094317	G	T	BRCA1	NC_000017.11:g.43094317G>T	NM_007294.4:c.1214C>A	S405*	pathogenic
17	43092201	CT	C	BRCA1	NC_000017.11:g.43092202del	NM_007294.4:c.3329del	K1110Sfs*7	pathogenic
17	43091768	T	TAA	BRCA1	NC_000017.11:g.43091768_43091769insAA	NM_007294.4:c.3762_3763insTT	N1255Lfs*10	pathogenic
17	43093472	G	A	BRCA1	NC_000017.11:g.43093472G>A	NM_007294.4:c.2059C>T	Q687*	pathogenic
17	43093041	C	CATGGATACTT	BRCA1	NC_000017.11:g.43093041_43093042insATGGATACTT	NM_007294.4:c.2489_2490insAAGTATCCAT	Y831Sfs*9	pathogenic
17	43091847	GT	G	BRCA1	NC_000017.11:g.43091848del	NM_007294.4:c.3683del	H1228Pfs*7	pathogenic
17	43091940	ATGTGTATG	A	BRCA1	NC_000017.11:g.43091941_43091948del	NM_007294.4:c.3583_3590del	H1195Ffs*21	pathogenic
17	43049121	T	G	BRCA1	NC_000017.11:g.43049121T>G	NM_007294.4:c.5406A>C	T1802=	likely_benign
17	43115775	C	A	BRCA1	NC_000017.11:g.43115775C>A	NM_007294.4:c.85G>T	E29*	pathogenic
17	43076515	CT	C	BRCA1	NC_000017.11:g.43076516del	NM_007294.4:c.4456del	S1486Vfs*19	pathogenic
17	43067602	G	C	BRCA1	NC_000017.11:g.43067602G>C	NM_007294.4:c.5074+6C>G	?	benign
17	43049191	TG	T	BRCA1	NC_000017.11:g.43049192del	NM_007294.4:c.5335del	Q1779Nfs*14	pathogenic
17	43093668	A	G	BRCA1	NC_000017.11:g.43093668A>G	NM_007294.4:c.1863T>C	H621=	likely_benign
17	43093328	GT	G	BRCA1	NC_000017.11:g.43093329del	NM_007294.4:c.2202del	K734Nfs*2	pathogenic
17	43074341	C	T	BRCA1	NC_000017.11:g.43074341C>T	NM_007294.4:c.4665G>A	R1555=	likely_benign
17	43093529	G	A	BRCA1	NC_000017.11:g.43093529G>A	NM_007294.4:c.2002C>T	L668F	benign
17	43092821	CA	C	BRCA1	NC_000017.11:g.43092822del	NM_007294.4:c.2709del	C903Wfs*97	pathogenic
17	43093638	T	C	BRCA1	NC_000017.11:g.43093638T>C	NM_007294.4:c.1893A>G	L631=	likely_benign
17	43099790	CA	C	BRCA1	NC_000017.11:g.43099791del	NM_007294.4:c.531del	V178Sfs*56	pathogenic
17	43092026	C	CT	BRCA1	NC_000017.11:g.43092026_43092027insT	NM_007294.4:c.3504_3505insA	D1169Rfs*3	pathogenic
17	43104187	G	GA	BRCA1	NC_000017.11:g.43104187_43104188insA	NM_007294.4:c.375_376insT	Q126Sfs*16	pathogenic
17	43093807	T	TC	BRCA1	NC_000017.11:g.43093808dup	NM_007294.4:c.1723dup	E575Gfs*11	pathogenic
17	43106490	G	A	BRCA1	NC_000017.11:g.43106490G>A	NM_007294.4:c.178C>T	Q60*	pathogenic
17	43106517	GT	G	BRCA1	NC_000017.11:g.43106518del	NM_007294.4:c.150del	K50Nfs*19	pathogenic
17	43092928	G	C	BRCA1	NC_000017.11:g.43092928G>C	NM_007294.4:c.2603C>G	S868*	pathogenic
17	43063878	A	C	BRCA1	NC_000017.11:g.43063878A>C	NM_007294.4:c.5148T>G	Y1716*	pathogenic
17	43050878	T	G	BRCA1	NC_000017.11:g.43050878T>G	NM_007294.4:c.5332+185A>C	?	benign
17	43067690	G	A	BRCA1	NC_000017.11:g.43067690G>A	NM_007294.4:c.4992C>T	L1664=	benign
17	43051093	AAC	A	BRCA1	NC_000017.11:g.43051094_43051095del	NM_007294.4:c.5300_5301del	C1767Lfs*62	pathogenic
17	43083162	T	TTTTC	BRCA1	NC_000017.11:g.43083163_43083166dup	NM_007294.4:c.4186-591_4186-588dup	-	benign
17	43045694	G	C	BRCA1	NC_000017.11:g.43045694G>C	NM_007294.4:c.5576C>G	P1859R	benign
17	43064916	T	C	BRCA1	NC_000017.11:g.43064916T>C	NM_007294.4:c.5075-965A>G	?	benign
17	43092104	ATGCATGACTAC	G	BRCA1	NC_000017.11:g.43092104_43092115delinsG	NM_007294.4:c.3416_3427delinsC	S1139Tfs*6	pathogenic
17	43045698	T	G	BRCA1	NC_000017.11:g.43045698T>G	NM_007294.4:c.5572A>C	I1858L	benign
17	43091842	A	C	BRCA1	NC_000017.11:g.43091842A>C	NM_007294.4:c.3689T>G	L1230*	pathogenic
17	43071069	A	G	BRCA1	NC_000017.11:g.43071069A>G	NM_007294.4:c.4845T>C	A1615=	likely_benign
17	43094017	T	TA	BRCA1	NC_000017.11:g.43094017_43094018insA	NM_007294.4:c.1513_1514insT	K505Ifs*11	pathogenic
17	43092991	ATT	C	BRCA1	NC_000017.11:g.43092991_43092993delinsC	NM_007294.4:c.2538_2540delinsG	M847Gfs*4	pathogenic
17	43082508	AAC	A	BRCA1	NC_000017.11:g.43082509_43082510del	NM_007294.4:c.4251_4252del	L1418Rfs*9	pathogenic
17	43094026	A	C	BRCA1	NC_000017.11:g.43094026A>C	NM_007294.4:c.1505T>G	L502*	pathogenic
17	43057090	G	A	BRCA1	NC_000017.11:g.43057090G>A	NM_007294.4:c.5239C>T	Q1747*	pathogenic
17	43091766	G	GT	BRCA1	NC_000017.11:g.43091767dup	NM_007294.4:c.3764dup	N1255Kfs*12	pathogenic
17	43049498	C	T	BRCA1	NC_000017.11:g.43049498C>T	NM_007294.4:c.5333-304G>A	?	benign
17	43091770	TTAGAC	T	BRCA1	NC_000017.11:g.43091771_43091775del	NM_007294.4:c.3756_3760del	S1253Efs*12	pathogenic
17	43091437	A	C	BRCA1	NC_000017.11:g.43091437A>C	NM_007294.4:c.4094T>G	L1365*	pathogenic
17	43093039	TACTTAAAGCCTTCTG	CA	BRCA1	NC_000017.11:g.43093039_43093054delinsCA	NM_007294.4:c.2477_2492delinsTG	T826Mfs*6	pathogenic
17	43092844	CTT	C	BRCA1	NC_000017.11:g.43092845_43092846del	NM_007294.4:c.2685_2686del	P897Kfs*5	pathogenic
17	43092590	GT	G	BRCA1	NC_000017.11:g.43092591del	NM_007294.4:c.2940del	P981Hfs*19	pathogenic
17	43070922	A	C	BRCA1	NC_000017.11:g.43070922A>C	NM_007294.4:c.4986+6T>G	?	pathogenic
17	43092969	A	AGC	BRCA1	NC_000017.11:g.43092970_43092971dup	NM_007294.4:c.2560_2561dup	Q855Lfs*39	pathogenic
17	43067654	TA	T	BRCA1	NC_000017.11:g.43067655del	NM_007294.4:c.5027del	L1676*	pathogenic
17	43094692	G	C	BRCA1	NC_000017.11:g.43094692G>C	NM_007294.4:c.839C>G	A280G	benign
17	43091557	CT	C	BRCA1	NC_000017.11:g.43091558del	NM_007294.4:c.3973del	R1325Gfs*11	pathogenic
17	43093362	ATTGACAAATTCTTT	A	BRCA1	NC_000017.11:g.43093363_43093376del	NM_007294.4:c.2155_2168del	K719Sfs*2	pathogenic
17	43094075	A	G	BRCA1	NC_000017.11:g.43094075A>G	NM_007294.4:c.1456T>C	F486L	benign
17	43093376	T	C	BRCA1	NC_000017.11:g.43093376T>C	NM_007294.4:c.2155A>G	K719E	benign
17	43093704	A	G	BRCA1	NC_000017.11:g.43093704A>G	NM_007294.4:c.1827T>C	N609=	likely_benign
17	43091481	G	A	BRCA1	NC_000017.11:g.43091481G>A	NM_007294.4:c.4050C>T	G1350=	likely_benign
17	43063349	CT	C	BRCA1	NC_000017.11:g.43063350del	NM_007294.4:c.5176del	R1726Efs*4	pathogenic
17	43097346	TA	T	BRCA1	NC_000017.11:g.43097347del	NM_007294.4:c.548-58del	?	benign
17	43092091	GAACA	G	BRCA1	NC_000017.11:g.43092092_43092095del	NM_007294.4:c.3436_3439del	C1146Lfs*8	pathogenic
17	43094760	A	AT	BRCA1	NC_000017.11:g.43094761dup	NM_007294.4:c.770dup	H257Qfs*8	pathogenic
17	43115793	G	A	BRCA1	NC_000017.11:g.43115793G>A	NM_007294.4:c.81-14C>T	?	benign
17	43090962	ACT	A	BRCA1	NC_000017.11:g.43090963_43090964del	NM_007294.4:c.4165_4166del	S1389*	pathogenic
17	43093106	CA	C	BRCA1	NC_000017.11:g.43093107del	NM_007294.4:c.2424del	F808Lfs*7	pathogenic
17	43092421	T	TA	BRCA1	NC_000017.11:g.43092421_43092422insA	NM_007294.4:c.3109_3110insT	K1037Ifs*9	pathogenic
17	43106526	T	TA	BRCA1	NC_000017.11:g.43106526_43106527insA	NM_007294.4:c.141_142insT	M48Yfs*18	pathogenic
17	43082403	C	A	BRCA1	NC_000017.11:g.43082403C>A	NM_007294.4:c.4357+1G>T	?	pathogenic
17	43094130	C	T	BRCA1	NC_000017.11:g.43094130C>T	NM_007294.4:c.1401G>A	K467=	likely_benign
17	43091663	T	A	BRCA1	NC_000017.11:g.43091663T>A	NM_007294.4:c.3868A>T	K1290*	pathogenic
17	43074436	A	AGG	BRCA1	NC_000017.11:g.43074436_43074437insGG	NM_007294.4:c.4569_4570insCC	S1524Pfs*25	pathogenic
17	43093343	C	A	BRCA1	NC_000017.11:g.43093343C>A	NM_007294.4:c.2188G>T	E730*	pathogenic
17	43092666	TGATA	T	BRCA1	NC_000017.11:g.43092667_43092670del	NM_007294.4:c.2861_2864del	L954Hfs*45	pathogenic
17	43063379	G	T	BRCA1	NC_000017.11:g.43063379G>T	NM_007294.4:c.5153-6C>A	?	benign
17	43092471	TGGAA	T	BRCA1	NC_000017.11:g.43092472_43092475del	NM_007294.4:c.3056_3059del	I1019Kfs*4	pathogenic
17	43091823	A	C	BRCA1	NC_000017.11:g.43091823A>C	NM_007294.4:c.3708T>G	N1236K	benign
17	43091557	CTC	TT	BRCA1	NC_000017.11:g.43091557_43091559delinsTT	NM_007294.4:c.3972_3974delinsAA	M1324Ifs*12	pathogenic
17	43093428	C	T	BRCA1	NC_000017.11:g.43093428C>T	NM_007294.4:c.2103G>A	K701=	likely_benign
17	43076486	AC	A	BRCA1	NC_000017.11:g.43076487del	NM_007294.4:c.4484+1del	?	pathogenic
17	43091771	TAG	T	BRCA1	NC_000017.11:g.43091772_43091773del	NM_007294.4:c.3758_3759del	S1253*	pathogenic
17	43093704	ATTCT	A	BRCA1	NC_000017.11:g.43093705_43093708del	NM_007294.4:c.1823_1826del	K608Ifs*3	pathogenic
17	43093373	C	A	BRCA1	NC_000017.11:g.43093373C>A	NM_007294.4:c.2158G>T	E720*	pathogenic
17	43045733	TG	T	BRCA1	NC_000017.11:g.43045734del	NM_007294.4:c.5536del	Q1846Sfs*9	pathogenic
17	43091658	A	AG	BRCA1	NC_000017.11:g.43091658_43091659insG	NM_007294.4:c.3872_3873insC	S1292Ffs*3	pathogenic
17	43063362	A	AG	BRCA1	NC_000017.11:g.43063362_43063363insG	NM_007294.4:c.5163_5164insC	S1722Lfs*3	pathogenic
17	43094684	ATGAG	A	BRCA1	NC_000017.11:g.43094685_43094688del	NM_007294.4:c.843_846del	S282Yfs*15	pathogenic
17	43049174	G	GT	BRCA1	NC_000017.11:g.43049175dup	NM_007294.4:c.5352dup	Q1785Tfs*45	pathogenic
17	43057094	G	GT	BRCA1	NC_000017.11:g.43057095dup	NM_007294.4:c.5234dup	N1745Kfs*85	pathogenic
17	43092020	T	A	BRCA1	NC_000017.11:g.43092020T>A	NM_007294.4:c.3511A>T	K1171*	pathogenic
17	43092592	AT	A	BRCA1	NC_000017.11:g.43092593del	NM_007294.4:c.2938del	I980Yfs*20	pathogenic
17	43112347	A	G	BRCA1	NC_000017.11:g.43112347A>G	NM_007294.4:c.134+3379T>C	?	benign
17	43074422	G	A	BRCA1	NC_000017.11:g.43074422G>A	NM_007294.4:c.4584C>T	L1528=	likely_benign
17	43091829	T	C	BRCA1	NC_000017.11:g.43091829T>C	NM_007294.4:c.3702A>G	V1234=	likely_benign
17	43093216	AC	A	BRCA1	NC_000017.11:g.43093217del	NM_007294.4:c.2314del	V772Yfs*20	pathogenic
17	43092959	G	A	BRCA1	NC_000017.11:g.43092959G>A	NM_007294.4:c.2572C>T	Q858*	pathogenic
17	43104877	CTG	C	BRCA1	NC_000017.11:g.43104878_43104879del	NM_007294.4:c.290_291del	T97Rfs*9	pathogenic
17	43063903	G	T	BRCA1	NC_000017.11:g.43063903G>T	NM_007294.4:c.5123C>A	A1708E	pathogenic
17	43057097	TC	T	BRCA1	NC_000017.11:g.43057098del	NM_007294.4:c.5231del	R1744Kfs*21	pathogenic
17	43095875	T	C	BRCA1	NC_000017.11:g.43095875T>C	NM_007294.4:c.641A>G	D214G	benign
17	43071149	GA	G	BRCA1	NC_000017.11:g.43071150del	NM_007294.4:c.4764del	R1589Vfs*12	pathogenic
17	43092356	TA	T	BRCA1	NC_000017.11:g.43092357del	NM_007294.4:c.3174del	N1059Mfs*3	pathogenic
17	43104205	CT	A	BRCA1	NC_000017.11:g.43104205_43104206delinsA	NM_007294.4:c.357_358delinsT	K119Nfs*44	pathogenic
17	43093416	T	A	BRCA1	NC_000017.11:g.43093416T>A	NM_007294.4:c.2115A>T	A705=	likely_benign
17	43092779	TG	T	BRCA1	NC_000017.11:g.43092780del	NM_007294.4:c.2751del	K918Sfs*82	pathogenic
17	43094715	C	CTCCACATGGA	BRCA1	NC_000017.11:g.43094715_43094716insTCCACATGGA	NM_007294.4:c.815_816insTCCATGTGGA	E272Dfs*18	pathogenic
17	43070082	C	T	BRCA1	NC_000017.11:g.43070082C>T	NM_007294.4:c.4986+846G>A	?	benign
17	43092568	G	T	BRCA1	NC_000017.11:g.43092568G>T	NM_007294.4:c.2963C>A	S988*	pathogenic
17	43092265	A	T	BRCA1	NC_000017.11:g.43092265A>T	NM_007294.4:c.3266T>A	L1089*	pathogenic
17	43115737	G	A	BRCA1	NC_000017.11:g.43115737G>A	NM_007294.4:c.123C>T	H41=	likely_benign
17	43092763	ACTGT	A	BRCA1	NC_000017.11:g.43092764_43092767del	NM_007294.4:c.2764_2767del	T922Lfs*77	pathogenic
17	43104941	ACTTT	A	BRCA1	NC_000017.11:g.43104942_43104945del	NM_007294.4:c.224_227del	E75Vfs*12	pathogenic
17	43093209	A	T	BRCA1	NC_000017.11:g.43093209A>T	NM_007294.4:c.2322T>A	G774=	likely_benign
17	43106477	C	T	BRCA1	NC_000017.11:g.43106477C>T	NM_007294.4:c.191G>A	C64Y	pathogenic
17	43094320	TCA	T	BRCA1	NC_000017.11:g.43094321_43094322del	NM_007294.4:c.1209_1210del	E404Ifs*7	pathogenic
17	43082489	C	T	BRCA1	NC_000017.11:g.43082489C>T	NM_007294.4:c.4272G>A	Q1424=	likely_benign
17	43045735	G	C	BRCA1	NC_000017.11:g.43045735G>C	NM_007294.4:c.5535C>G	Y1845*	pathogenic
17	43092201	CTTTT	C	BRCA1	NC_000017.11:g.43092202_43092205del	NM_007294.4:c.3326_3329del	K1109Sfs*7	pathogenic
17	43082287	C	T	BRCA1	NC_000017.11:g.43082287C>T	NM_007294.4:c.4357+117G>A	?	benign
17	43051084	GC	G	BRCA1	NC_000017.11:g.43051085del	NM_007294.4:c.5310del	F1772Sfs*21	pathogenic
17	43091903	C	CT	BRCA1	NC_000017.11:g.43091904dup	NM_007294.4:c.3627dup	E1210Rfs*9	pathogenic
17	43067623	C	CGTTG	BRCA1	NC_000017.11:g.43067623_43067624insGTTG	NM_007294.4:c.5058_5059insCAAC	V1687Qfs*9	pathogenic
17	43104968	T	C	BRCA1	NC_000017.11:g.43104968T>C	NM_007294.4:c.213-12A>G	?	pathogenic
17	43093723	G	C	BRCA1	NC_000017.11:g.43093723G>C	NM_007294.4:c.1808C>G	S603*	pathogenic
17	43093399	T	TTAGTAAAAGAACCAGGTGCA	BRCA1	NC_000017.11:g.43093400_43093419dup	NM_007294.4:c.2112_2131dup	K711Mfs*32	pathogenic
17	43067608	C	G	BRCA1	NC_000017.11:g.43067608C>G	NM_007294.4:c.5074G>C	D1692H	pathogenic
17	43093312	AC	A	BRCA1	NC_000017.11:g.43093313del	NM_007294.4:c.2218del	V740Cfs*13	pathogenic
17	43093356	GC	G	BRCA1	NC_000017.11:g.43093357del	NM_007294.4:c.2174del	S725Tfs*11	pathogenic
17	43091780	AC	A	BRCA1	NC_000017.11:g.43091781del	NM_007294.4:c.3750del	E1250Dfs*14	pathogenic
17	43092244	TG	T	BRCA1	NC_000017.11:g.43092245del	NM_007294.4:c.3286del	Q1096Kfs*13	pathogenic
17	43093929	C	CT	BRCA1	NC_000017.11:g.43093930dup	NM_007294.4:c.1601dup	T536Nfs*2	pathogenic
17	43095103	A	ATAC	BRCA1	NC_000017.11:g.43095103_43095104insTAC	NM_007294.4:c.671-244_671-243insGTA	?	benign
17	43094606	TG	T	BRCA1	NC_000017.11:g.43094607del	NM_007294.4:c.924del	S308Rfs*6	pathogenic
17	43094040	G	C	BRCA1	NC_000017.11:g.43094040G>C	NM_007294.4:c.1491C>G	P497=	likely_benign
17	43092132	TAA	T	BRCA1	NC_000017.11:g.43092133_43092134del	NM_007294.4:c.3397_3398del	L1133Rfs*7	pathogenic
17	43093876	CCACTATTAGTAATATTCAT	C	BRCA1	NC_000017.11:g.43093877_43093895del	NM_007294.4:c.1636_1654del	M546Vfs*20	pathogenic
17	43093707	CT	C	BRCA1	NC_000017.11:g.43093708del	NM_007294.4:c.1823del	K608Rfs*4	pathogenic
17	43093017	GT	G	BRCA1	NC_000017.11:g.43093018del	NM_007294.4:c.2513del	N838Tfs*8	pathogenic
17	43093356	G	A	BRCA1	NC_000017.11:g.43093356G>A	NM_007294.4:c.2175C>T	S725=	likely_benign
17	43094512	A	AT	BRCA1	NC_000017.11:g.43094512_43094513insT	NM_007294.4:c.1018_1019insA	V340Dfs*6	pathogenic
17	43093283	G	GTC	BRCA1	NC_000017.11:g.43093283_43093284insTC	NM_007294.4:c.2247_2248insGA	L750Dfs*4	pathogenic
17	43091575	CCAAT	C	BRCA1	NC_000017.11:g.43091576_43091579del	NM_007294.4:c.3952_3955del	I1318Vfs*6	pathogenic
17	43092113	TA	T	BRCA1	NC_000017.11:g.43092114del	NM_007294.4:c.3417del	S1139Rfs*16	pathogenic
17	43104162	GCA	G	BRCA1	NC_000017.11:g.43104163_43104164del	NM_007294.4:c.399_400del	A134Qfs*7	pathogenic
17	43093403	TA	T	BRCA1	NC_000017.11:g.43093404del	NM_007294.4:c.2127del	F709Lfs*27	pathogenic
17	43093313	C	CT	BRCA1	NC_000017.11:g.43093314dup	NM_007294.4:c.2217dup	V740Sfs*3	pathogenic
17	43104151	G	GA	BRCA1	NC_000017.11:g.43104152dup	NM_007294.4:c.411dup	L138Sfs*4	pathogenic
17	43092648	G	A	BRCA1	NC_000017.11:g.43092648G>A	NM_007294.4:c.2883C>T	N961=	likely_benign
17	43092995	C	A	BRCA1	NC_000017.11:g.43092995C>A	NM_007294.4:c.2536G>T	E846*	pathogenic
17	43092175	GTC	G	BRCA1	NC_000017.11:g.43092176_43092177del	NM_007294.4:c.3354_3355del	Q1118Hfs*3	pathogenic
17	43112722	C	T	BRCA1	NC_000017.11:g.43112722C>T	NM_007294.4:c.134+3004G>A	?	benign
17	43093467	T	C	BRCA1	NC_000017.11:g.43093467T>C	NM_007294.4:c.2064A>G	T688=	likely_benign
17	43094326	TC	T	BRCA1	NC_000017.11:g.43094327del	NM_007294.4:c.1204del	E402Sfs*8	pathogenic
17	43076570	TC	T	BRCA1	NC_000017.11:g.43076571del	NM_007294.4:c.4401del	N1468Ifs*37	pathogenic
17	43093646	TACTG	T	BRCA1	NC_000017.11:g.43093647_43093650del	NM_007294.4:c.1881_1884del	S628Efs*3	pathogenic
17	43093370	ATTCT	A	BRCA1	NC_000017.11:g.43093371_43093374del	NM_007294.4:c.2157_2160del	K719Nfs*16	pathogenic
17	43115033	G	A	BRCA1	NC_000017.11:g.43115033G>A	NM_007294.4:c.134+693C>T	?	benign
17	43091815	GA	G	BRCA1	NC_000017.11:g.43091816del	NM_007294.4:c.3715del	S1239Lfs*25	pathogenic
17	43082456	G	A	BRCA1	NC_000017.11:g.43082456G>A	NM_007294.4:c.4305C>T	D1435=	likely_benign
17	43051083	GGC	G	BRCA1	NC_000017.11:g.43051084_43051085del	NM_007294.4:c.5310_5311del	P1771Lfs*58	pathogenic
17	43092540	AT	A	BRCA1	NC_000017.11:g.43092541del	NM_007294.4:c.2990del	N997Ifs*3	pathogenic
17	43071072	T	TG	BRCA1	NC_000017.11:g.43071073dup	NM_007294.4:c.4841dup	A1615Sfs*7	pathogenic
17	43091990	C	T	BRCA1	NC_000017.11:g.43091990C>T	NM_007294.4:c.3541G>A	V1181I	benign
17	43095877	C	T	BRCA1	NC_000017.11:g.43095877C>T	NM_007294.4:c.639G>A	R213=	likely_benign
17	43094090	G	GT	BRCA1	NC_000017.11:g.43094090_43094091insT	NM_007294.4:c.1440_1441insA	L481Tfs*9	pathogenic
17	43074519	G	C	BRCA1	NC_000017.11:g.43074519G>C	NM_007294.4:c.4487C>G	S1496*	pathogenic
17	43094270	C	A	BRCA1	NC_000017.11:g.43094270C>A	NM_007294.4:c.1261G>T	E421*	pathogenic
17	43092506	A	AC	BRCA1	NC_000017.11:g.43092507dup	NM_007294.4:c.3024dup	S1009Vfs*3	pathogenic
17	43093761	ACT	G	BRCA1	NC_000017.11:g.43093761_43093763delinsG	NM_007294.4:c.1768_1770delinsC	S590Hfs*17	pathogenic
17	43099478	C	G	BRCA1	NC_000017.11:g.43099478C>G	NM_007294.4:c.547+297G>C	?	benign
17	43092277	C	CT	BRCA1	NC_000017.11:g.43092278dup	NM_007294.4:c.3253dup	R1085Kfs*8	pathogenic
17	43104952	G	A	BRCA1	NC_000017.11:g.43104952G>A	NM_007294.4:c.217C>T	L73=	likely_benign
17	43071129	AG	A	BRCA1	NC_000017.11:g.43071130del	NM_007294.4:c.4784del	S1595Ffs*6	pathogenic
17	43071147	A	C	BRCA1	NC_000017.11:g.43071147A>C	NM_007294.4:c.4767T>G	R1589=	likely_benign
17	43063788	CA	C	BRCA1	NC_000017.11:g.43063789del	NM_007294.4:c.5152+85del	?	benign
17	43093218	C	CG	BRCA1	NC_000017.11:g.43093218_43093219insG	NM_007294.4:c.2312_2313insC	L771Ffs*6	pathogenic
17	43067624	A	ATGAG	BRCA1	NC_000017.11:g.43067625_43067628dup	NM_007294.4:c.5054_5057dup	V1687Sfs*9	pathogenic
17	43091709	T	G	BRCA1	NC_000017.11:g.43091709T>G	NM_007294.4:c.3822A>C	V1274=	likely_benign
17	43104173	G	A	BRCA1	NC_000017.11:g.43104173G>A	NM_007294.4:c.390C>T	Y130=	likely_benign
17	43094788	G	GT	BRCA1	NC_000017.11:g.43094789dup	NM_007294.4:c.742dup	T248Nfs*3	pathogenic
17	43057062	T	TG	BRCA1	NC_000017.11:g.43057063dup	NM_007294.4:c.5266dup	Q1756Pfs*74	pathogenic
17	43084031	AT	A	BRCA1	NC_000017.11:g.43084032del	NM_007294.4:c.4186-1457del	?	benign
17	43094132	T	A	BRCA1	NC_000017.11:g.43094132T>A	NM_007294.4:c.1399A>T	K467*	pathogenic
17	43094194	C	CT	BRCA1	NC_000017.11:g.43094195dup	NM_007294.4:c.1336dup	R446Kfs*10	pathogenic
17	43071078	CTG	C	BRCA1	NC_000017.11:g.43071079_43071080del	NM_007294.4:c.4834_4835del	Q1612Efs*9	pathogenic
17	43090983	G	T	BRCA1	NC_000017.11:g.43090983G>T	NM_007294.4:c.4146C>A	C1382*	pathogenic
17	43050880	G	GT	BRCA1	NC_000017.11:g.43050881dup	NM_007294.4:c.5332+182dup	?	benign
17	43082498	A	G	BRCA1	NC_000017.11:g.43082498A>G	NM_007294.4:c.4263T>C	H1421=	likely_benign
17	43092536	G	A	BRCA1	NC_000017.11:g.43092536G>A	NM_007294.4:c.2995C>T	L999=	likely_benign
17	43092624	AT	A	BRCA1	NC_000017.11:g.43092625del	NM_007294.4:c.2906del	N969Ifs*31	pathogenic
17	43045767	G	A	BRCA1	NC_000017.11:g.43045767G>A	NM_007294.4:c.5503C>T	R1835*	pathogenic
17	43092173	CA	C	BRCA1	NC_000017.11:g.43092174del	NM_007294.4:c.3357del	V1120Lfs*9	pathogenic
17	43082474	G	T	BRCA1	NC_000017.11:g.43082474G>T	NM_007294.4:c.4287C>A	Y1429*	pathogenic
17	43094137	T	TAGGTTTTCCC	BRCA1	NC_000017.11:g.43094138_43094147dup	NM_007294.4:c.1384_1393dup	Y465Wfs*18	pathogenic
17	43092017	C	A	BRCA1	NC_000017.11:g.43092017C>A	NM_007294.4:c.3514G>T	E1172*	pathogenic
17	43113054	T	C	BRCA1	NC_000017.11:g.43113054T>C	NM_007294.4:c.134+2672A>G	?	benign
17	43094356	AG	A	BRCA1	NC_000017.11:g.43094357del	NM_007294.4:c.1174del	L392Cfs*2	pathogenic
17	43094703	T	C	BRCA1	NC_000017.11:g.43094703T>C	NM_007294.4:c.828A>G	T276=	likely_benign
17	43088583	C	T	BRCA1	NC_000017.11:g.43088583C>T	NM_007294.4:c.4185+2361G>A	?	benign
17	43091623	AA	TCC	BRCA1	NC_000017.11:g.43091623_43091624delinsTCC	NM_007294.4:c.3907_3908delinsGGA	L1303Gfs*27	pathogenic
17	43094700	ATT	A	BRCA1	NC_000017.11:g.43094701_43094702del	NM_007294.4:c.829_830del	N277Yfs*9	pathogenic
17	43093979	TA	T	BRCA1	NC_000017.11:g.43093980del	NM_007294.4:c.1551del	F517Lfs*15	pathogenic
17	43067654	T	C	BRCA1	NC_000017.11:g.43067654T>C	NM_007294.4:c.5028A>G	L1676=	likely_benign
17	43044565	C	T	BRCA1	NC_000017.11:g.43044565C>T	NM_007294.4:c.*1113G>A	?	benign
17	43091641	GA	G	BRCA1	NC_000017.11:g.43091642del	NM_007294.4:c.3889del	S1297Lfs*10	pathogenic
17	43104186	T	TA	BRCA1	NC_000017.11:g.43104186_43104187insA	NM_007294.4:c.376_377insT	Q126Lfs*16	pathogenic
17	43094572	CT	C	BRCA1	NC_000017.11:g.43094573del	NM_007294.4:c.958del	R320Dfs*21	pathogenic
17	43091489	C	A	BRCA1	NC_000017.11:g.43091489C>A	NM_007294.4:c.4042G>T	G1348*	pathogenic
17	43057077	C	T	BRCA1	NC_000017.11:g.43057077C>T	NM_007294.4:c.5252G>A	R1751Q	benign
17	43093404	A	AT	BRCA1	NC_000017.11:g.43093404_43093405insT	NM_007294.4:c.2126_2127insA	F709Lfs*3	pathogenic
17	43092195	TTCTTG	T	BRCA1	NC_000017.11:g.43092196_43092200del	NM_007294.4:c.3331_3335del	Q1111Ifs*2	pathogenic
17	43093128	A	T	BRCA1	NC_000017.11:g.43093128A>T	NM_007294.4:c.2403T>A	C801*	pathogenic
17	43081192	A	G	BRCA1	NC_000017.11:g.43081192A>G	NM_007294.4:c.4357+1212T>C	?	benign
17	43091517	CT	C	BRCA1	NC_000017.11:g.43091518del	NM_007294.4:c.4013del	K1338Rfs*28	pathogenic
17	43091716	T	TA	BRCA1	NC_000017.11:g.43091716_43091717insA	NM_007294.4:c.3814_3815insT	N1272Ifs*15	pathogenic
17	43106487	A	C	BRCA1	NC_000017.11:g.43106487A>C	NM_007294.4:c.181T>G	C61G	pathogenic
17	43099845	A	G	BRCA1	NC_000017.11:g.43099845A>G	NM_007294.4:c.477T>C	L159=	likely_benign
17	43093022	CTT	C	BRCA1	NC_000017.11:g.43093023_43093024del	NM_007294.4:c.2507_2508del	E836Gfs*2	pathogenic
17	43092968	G	GGC	BRCA1	NC_000017.11:g.43092968_43092969insGC	NM_007294.4:c.2562_2563insGC	Q855Afs*39	pathogenic
17	43082024	T	C	BRCA1	NC_000017.11:g.43082024T>C	NM_007294.4:c.4357+380A>G	?	benign
17	43093693	CT	C	BRCA1	NC_000017.11:g.43093694del	NM_007294.4:c.1837del	R613Gfs*13	pathogenic
17	43092677	ACCTAGAGCCT	A	BRCA1	NC_000017.11:g.43092678_43092687del	NM_007294.4:c.2844_2853del	G949Ffs*48	pathogenic
17	43082510	CA	C	BRCA1	NC_000017.11:g.43082511del	NM_007294.4:c.4250del	V1417Gfs*2	pathogenic
17	43093846	ATAGAATCACCTTTTGTTTTATTCTCATGACCACTATTAGTAATATTCA	CTTTC	BRCA1	NC_000017.11:g.43093846_43093894delinsCTTTC	NM_007294.4:c.1637_1685delinsGAAAG	M546Rfs*5	pathogenic
17	43091950	GT	G	BRCA1	NC_000017.11:g.43091951del	NM_007294.4:c.3580del	T1194Pfs*16	pathogenic
17	43106462	G	GT	BRCA1	NC_000017.11:g.43106463dup	NM_007294.4:c.205dup	T69Nfs*12	pathogenic
17	43092034	GC	G	BRCA1	NC_000017.11:g.43092035del	NM_007294.4:c.3496del	A1166Lfs*44	pathogenic
17	43099859	G	C	BRCA1	NC_000017.11:g.43099859G>C	NM_007294.4:c.463C>G	Q155E	benign
17	43093033	A	AATGGATACTT	BRCA1	NC_000017.11:g.43093034_43093043dup	NM_007294.4:c.2488_2497dup	L833*	pathogenic
17	43092864	A	AG	BRCA1	NC_000017.11:g.43092865dup	NM_007294.4:c.2666dup	G890Wfs*13	pathogenic
17	43082407	T	A	BRCA1	NC_000017.11:g.43082407T>A	NM_007294.4:c.4354A>T	K1452*	pathogenic
17	43094600	GC	G	BRCA1	NC_000017.11:g.43094601del	NM_007294.4:c.930del	Q310Hfs*4	pathogenic
17	43045766	C	CGG	BRCA1	NC_000017.11:g.43045767_43045768dup	NM_007294.4:c.5502_5503dup	R1835Pfs*9	pathogenic
17	43093200	A	C	BRCA1	NC_000017.11:g.43093200A>C	NM_007294.4:c.2331T>G	Y777*	pathogenic
17	43047669	GC	G	BRCA1	NC_000017.11:g.43047670del	NM_007294.4:c.5440del	A1814Pfs*20	pathogenic
17	43094278	T	TC	BRCA1	NC_000017.11:g.43094279dup	NM_007294.4:c.1252dup	E418Gfs*4	pathogenic
17	43070968	CT	C	BRCA1	NC_000017.11:g.43070969del	NM_007294.4:c.4945del	R1649Efs*9	pathogenic
17	43082534	C	T	BRCA1	NC_000017.11:g.43082534C>T	NM_007294.4:c.4227G>A	Q1409=	likely_benign
17	43092618	A	G	BRCA1	NC_000017.11:g.43092618A>G	NM_007294.4:c.2913T>C	H971=	likely_benign
17	43092785	T	TA	BRCA1	NC_000017.11:g.43092786dup	NM_007294.4:c.2745dup	N916*	pathogenic
17	43092492	TTC	T	BRCA1	NC_000017.11:g.43092493_43092494del	NM_007294.4:c.3037_3038del	E1013Nfs*4	pathogenic
17	43078938	G	A	BRCA1	NC_000017.11:g.43078938G>A	NM_007294.4:c.4358-2324C>T	?	benign
17	43063922	TCA	T	BRCA1	NC_000017.11:g.43063923_43063924del	NM_007294.4:c.5102_5103del	L1701Qfs*14	pathogenic
17	43046757	C	CA	BRCA1	NC_000017.11:g.43046758dup	NM_007294.4:c.5467+885dup	?	benign
17	43115792	G	C	BRCA1	NC_000017.11:g.43115792G>C	NM_007294.4:c.81-13C>G	?	benign
17	43093010	G	A	BRCA1	NC_000017.11:g.43093010G>A	NM_007294.4:c.2521C>T	R841W	benign
17	43115757	CA	C	BRCA1	NC_000017.11:g.43115758del	NM_007294.4:c.102del	V35Sfs*15	pathogenic
17	43067787	T	C	BRCA1	NC_000017.11:g.43067787T>C	NM_007294.4:c.4987-92A>G	?	benign
17	43096887	G	A	BRCA1	NC_000017.11:g.43096887G>A	NM_007294.4:c.593+357C>T	?	benign
17	43091891	C	A	BRCA1	NC_000017.11:g.43091891C>A	NM_007294.4:c.3640G>T	E1214*	pathogenic
17	43071231	G	A	BRCA1	NC_000017.11:g.43071231G>A	NM_007294.4:c.4683C>T	T1561=	likely_benign
17	43104197	A	C	BRCA1	NC_000017.11:g.43104197A>C	NM_007294.4:c.366T>G	V122=	likely_benign
17	43091792	C	T	BRCA1	NC_000017.11:g.43091792C>T	NM_007294.4:c.3739G>A	V1247I	benign
17	43092349	AT	A	BRCA1	NC_000017.11:g.43092350del	NM_007294.4:c.3181del	I1061*	pathogenic
17	43092448	C	T	BRCA1	NC_000017.11:g.43092448C>T	NM_007294.4:c.3083G>A	R1028H	benign
17	43091688	CTG	C	BRCA1	NC_000017.11:g.43091689_43091690del	NM_007294.4:c.3841_3842del	Q1281Gfs*5	pathogenic
17	43094813	G	A	BRCA1	NC_000017.11:g.43094813G>A	NM_007294.4:c.718C>T	Q240*	pathogenic
17	43093401	A	C	BRCA1	NC_000017.11:g.43093401A>C	NM_007294.4:c.2130T>G	T710=	likely_benign
17	43058377	A	C	BRCA1	NC_000017.11:g.43058377A>C	NM_007294.4:c.5194-1242T>G	?	benign
17	43118218	G	A	BRCA1	NC_000017.11:g.43118218G>A	NM_007294.4:c.81-2439C>T	?	benign
17	43091494	TC	T	BRCA1	NC_000017.11:g.43091495del	NM_007294.4:c.4036del	E1346Kfs*20	pathogenic
17	43093033	A	AATGGATAC	BRCA1	NC_000017.11:g.43093034_43093041dup	NM_007294.4:c.2490_2497dup	L833Cfs*16	pathogenic
17	43091891	C	T	BRCA1	NC_000017.11:g.43091891C>T	NM_007294.4:c.3640G>A	E1214K	benign
17	43099453	T	C	BRCA1	NC_000017.11:g.43099453T>C	NM_007294.4:c.547+322A>G	?	benign
17	43091770	T	TA	BRCA1	NC_000017.11:g.43091770_43091771insA	NM_007294.4:c.3760_3761insT	K1254Ifs*13	pathogenic
17	43057120	T	A	BRCA1	NC_000017.11:g.43057120T>A	NM_007294.4:c.5209A>T	R1737*	pathogenic
17	43092673	CAA	C	BRCA1	NC_000017.11:g.43092674_43092675del	NM_007294.4:c.2856_2857del	F952Lfs*18	pathogenic
17	43092820	TCA	T	BRCA1	NC_000017.11:g.43092821_43092822del	NM_007294.4:c.2709_2710del	C903*	pathogenic
17	43093452	G	GTA	BRCA1	NC_000017.11:g.43093452_43093453insTA	NM_007294.4:c.2078_2079insTA	S694Tfs*8	pathogenic
17	43104058	AAAAAAAAAAAAG	A	BRCA1	NC_000017.11:g.43104059_43104070del	NM_007294.4:c.441+52_441+63del	?	benign
17	43067628	G	A	BRCA1	NC_000017.11:g.43067628G>A	NM_007294.4:c.5054C>T	T1685I	pathogenic
17	43092482	C	A	BRCA1	NC_000017.11:g.43092482C>A	NM_007294.4:c.3049G>T	E1017*	pathogenic
17	43093142	C	A	BRCA1	NC_000017.11:g.43093142C>A	NM_007294.4:c.2389G>T	E797*	pathogenic
17	43091895	T	C	BRCA1	NC_000017.11:g.43091895T>C	NM_007294.4:c.3636A>G	S1212=	likely_benign
17	43092415	GC	G	BRCA1	NC_000017.11:g.43092416del	NM_007294.4:c.3115del	A1039Pfs*9	pathogenic
17	43093119	C	G	BRCA1	NC_000017.11:g.43093119C>G	NM_007294.4:c.2412G>C	Q804H	benign
17	43094619	GA	G	BRCA1	NC_000017.11:g.43094620del	NM_007294.4:c.911del	F304Sfs*10	pathogenic
17	43098983	AT	A	BRCA1	NC_000017.11:g.43098984del	NM_007294.4:c.547+791del	?	benign
17	43092878	A	AT	BRCA1	NC_000017.11:g.43092879dup	NM_007294.4:c.2652dup	F885Ifs*18	pathogenic
17	43093059	A	G	BRCA1	NC_000017.11:g.43093059A>G	NM_007294.4:c.2472T>C	N824=	likely_benign
17	43093063	CT	C	BRCA1	NC_000017.11:g.43093064del	NM_007294.4:c.2467del	R823Efs*23	pathogenic
17	43092578	G	GA	BRCA1	NC_000017.11:g.43092579dup	NM_007294.4:c.2952dup	P985Sfs*7	pathogenic
17	43094800	T	TTACTGGGTTGATGATGTTCAGTATTTGTTAC	BRCA1	NC_000017.11:g.43094800_43094801insTACTGGGTTGATGATGTTCAGTATTTGTTAC	NM_007294.4:c.730_731insGTAACAAATACTGAACATCATCAACCCAGTA	N244Sfs*5	pathogenic
17	43076573	G	GT	BRCA1	NC_000017.11:g.43076573_43076574insT	NM_007294.4:c.4398_4399insA	Q1467Tfs*9	pathogenic
17	43092651	GCC	G	BRCA1	NC_000017.11:g.43092652_43092653del	NM_007294.4:c.2878_2879del	G960Qfs*10	pathogenic
17	43092167	TATTAA	T	BRCA1	NC_000017.11:g.43092168_43092172del	NM_007294.4:c.3359_3363del	V1120Dfs*11	pathogenic
17	43094781	C	T	BRCA1	NC_000017.11:g.43094781C>T	NM_007294.4:c.750G>A	E250=	likely_benign
17	43094091	A	AT	BRCA1	NC_000017.11:g.43094092dup	NM_007294.4:c.1439dup	N480Kfs*10	pathogenic
17	43064188	G	T	BRCA1	NC_000017.11:g.43064188G>T	NM_007294.4:c.5075-237C>A	?	benign
17	43071236	C	A	BRCA1	NC_000017.11:g.43071236C>A	NM_007294.4:c.4678G>T	G1560*	pathogenic
17	43091766	GTT	G	BRCA1	NC_000017.11:g.43091767_43091768del	NM_007294.4:c.3763_3764del	N1255Hfs*11	pathogenic
17	43090966	TGAGAG	T	BRCA1	NC_000017.11:g.43090967_43090971del	NM_007294.4:c.4158_4162del	S1387Efs*2	pathogenic
17	43117298	C	T	BRCA1	NC_000017.11:g.43117298C>T	NM_007294.4:c.81-1519G>A	?	benign
17	43091721	G	T	BRCA1	NC_000017.11:g.43091721G>T	NM_007294.4:c.3810C>A	C1270*	pathogenic
17	43094678	GCT	G	BRCA1	NC_000017.11:g.43094679_43094680del	NM_007294.4:c.851_852del	Q284Pfs*2	pathogenic
17	43099863	ACT	A	BRCA1	NC_000017.11:g.43099864_43099865del	NM_007294.4:c.457_458del	S153Cfs*5	pathogenic
17	43097306	C	A	BRCA1	NC_000017.11:g.43097306C>A	NM_007294.4:c.548-17G>T	?	benign
17	43074385	CTTC	TTT	BRCA1	NC_000017.11:g.43074385_43074388delinsTTT	NM_007294.4:c.4618_4621delinsAAA	E1540Kfs*8	pathogenic
17	43073764	A	T	BRCA1	NC_000017.11:g.43073764A>T	NM_007294.4:c.4675+567T>A	?	benign
17	43092660	CTGAGA	C	BRCA1	NC_000017.11:g.43092661_43092665del	NM_007294.4:c.2866_2870del	S956Vfs*13	pathogenic
17	43044897	G	A	BRCA1	NC_000017.11:g.43044897G>A	NM_007294.4:c.*781C>T	?	benign
17	43104131	A	AT	BRCA1	NC_000017.11:g.43104132dup	NM_007294.4:c.431dup	N144Kfs*15	pathogenic
17	43093928	CCT	C	BRCA1	NC_000017.11:g.43093929_43093930del	NM_007294.4:c.1601_1602del	Q534Rfs*3	pathogenic
17	43094265	A	C	BRCA1	NC_000017.11:g.43094265A>C	NM_007294.4:c.1266T>G	Y422*	pathogenic
17	43091011	TCA	T	BRCA1	NC_000017.11:g.43091012_43091013del	NM_007294.4:c.4116_4117del	C1372*	pathogenic
17	43067691	A	G	BRCA1	NC_000017.11:g.43067691A>G	NM_007294.4:c.4991T>C	L1664P	benign
17	43094338	G	C	BRCA1	NC_000017.11:g.43094338G>C	NM_007294.4:c.1193C>G	S398*	pathogenic
17	43076556	A	G	BRCA1	NC_000017.11:g.43076556A>G	NM_007294.4:c.4416T>C	L1472=	likely_benign
17	43110532	G	A	BRCA1	NC_000017.11:g.43110532G>A	NM_007294.4:c.135-3999C>T	?	benign
17	43052188	C	T	BRCA1	NC_000017.11:g.43052188C>T	NM_007294.4:c.5278-1071G>A	?	benign
17	43093008	C	G	BRCA1	NC_000017.11:g.43093008C>G	NM_007294.4:c.2523G>C	R841=	likely_benign
17	43071225	G	C	BRCA1	NC_000017.11:g.43071225G>C	NM_007294.4:c.4689C>G	Y1563*	pathogenic
17	43065089	CA	C	BRCA1	NC_000017.11:g.43065090del	NM_007294.4:c.5075-1139del	?	benign
17	43082492	G	A	BRCA1	NC_000017.11:g.43082492G>A	NM_007294.4:c.4269C>T	S1423=	likely_benign
17	43093587	T	C	BRCA1	NC_000017.11:g.43093587T>C	NM_007294.4:c.1944A>G	E648=	likely_benign
17	43093496	T	A	BRCA1	NC_000017.11:g.43093496T>A	NM_007294.4:c.2035A>T	K679*	pathogenic
17	43093197	G	A	BRCA1	NC_000017.11:g.43093197G>A	NM_007294.4:c.2334C>T	G778=	likely_benign
17	43092566	ATGACT	A	BRCA1	NC_000017.11:g.43092567_43092571del	NM_007294.4:c.2960_2964del	K987Ifs*3	pathogenic
17	43092318	T	TTC	BRCA1	NC_000017.11:g.43092319_43092320dup	NM_007294.4:c.3211_3212dup	L1072Nfs*2	pathogenic
17	43051084	G	GC	BRCA1	NC_000017.11:g.43051085dup	NM_007294.4:c.5310dup	P1771Afs*59	pathogenic
17	43124045	TA	T	BRCA1	NC_000017.11:g.43124046del	NM_007294.4:c.51del	M18Cfs*5	pathogenic
17	43057131	T	C	BRCA1	NC_000017.11:g.43057131T>C	NM_007294.4:c.5198A>G	D1733G	benign
17	43082477	GCT	G	BRCA1	NC_000017.11:g.43082478_43082479del	NM_007294.4:c.4282_4283del	S1428Lfs*7	pathogenic
17	43119205	C	T	BRCA1	NC_000017.11:g.43119205C>T	NM_007294.4:c.81-3426G>A	?	benign
17	43091751	T	C	BRCA1	NC_000017.11:g.43091751T>C	NM_007294.4:c.3780A>G	L1260=	likely_benign
17	43082450	AG	A	BRCA1	NC_000017.11:g.43082451del	NM_007294.4:c.4310del	S1437Lfs*19	pathogenic
17	43089551	T	TC	BRCA1	NC_000017.11:g.43089551_43089552insC	NM_007294.4:c.4185+1392_4185+1393insG	?	benign
17	43094695	TG	T	BRCA1	NC_000017.11:g.43094696del	NM_007294.4:c.835del	H279Mfs*19	pathogenic
17	43092549	AC	A	BRCA1	NC_000017.11:g.43092550del	NM_007294.4:c.2981del	C994Lfs*6	pathogenic
17	43091759	CCT	C	BRCA1	NC_000017.11:g.43091760_43091761del	NM_007294.4:c.3770_3771del	E1257Gfs*9	pathogenic
17	43045788	ACATCTGCC	A	BRCA1	NC_000017.11:g.43045789_43045796del	NM_007294.4:c.5474_5481del	G1825Vfs*2	pathogenic
17	43094365	CT	C	BRCA1	NC_000017.11:g.43094366del	NM_007294.4:c.1165del	S389Vfs*5	pathogenic
17	43093727	TG	T	BRCA1	NC_000017.11:g.43093728del	NM_007294.4:c.1803del	H601Qfs*11	pathogenic
17	43092811	TC	T	BRCA1	NC_000017.11:g.43092812del	NM_007294.4:c.2719del	E907Kfs*93	pathogenic
17	43092455	T	TTGTGCTCACTGTACTTGGAATGATCTCATTTCCCATTTCTCTTTCAGGTGACATTGAATGTTCCTCAAAGTTTTCC	BRCA1	NC_000017.11:g.43092455_43092456insTGTGCTCACTGTACTTGGAATGATCTCATTTCCCATTTCTCTTTCAGGTGACATTGAATGTTCCTCAAAGTTTTCC	NM_007294.4:c.3075_3076insGGAAAACTTTGAGGAACATTCAATGTCACCTGAAAGAGAAATGGGAAATGAGATCATTCCAAGTACAGTGAGCACA	I1026Gfs*4	pathogenic
17	43099817	G	A	BRCA1	NC_000017.11:g.43099817G>A	NM_007294.4:c.505C>T	Q169*	pathogenic
17	43071039	A	T	BRCA1	NC_000017.11:g.43071039A>T	NM_007294.4:c.4875T>A	Y1625*	pathogenic
17	43053615	C	T	BRCA1	NC_000017.11:g.43053615C>T	NM_007294.4:c.5278-2498G>A	?	benign
17	43082447	G	C	BRCA1	NC_000017.11:g.43082447G>C	NM_007294.4:c.4314C>G	A1438=	likely_benign
17	43091814	A	T	BRCA1	NC_000017.11:g.43091814A>T	NM_007294.4:c.3717T>A	S1239=	likely_benign
17	43092204	T	C	BRCA1	NC_000017.11:g.43092204T>C	NM_007294.4:c.3327A>G	K1109=	likely_benign
17	43093454	CAT	C	BRCA1	NC_000017.11:g.43093455_43093456del	NM_007294.4:c.2075_2076del	H692Rfs*19	pathogenic
17	43094358	T	C	BRCA1	NC_000017.11:g.43094358T>C	NM_007294.4:c.1173A>G	E391=	likely_benign
17	43070944	AG	A	BRCA1	NC_000017.11:g.43070945del	NM_007294.4:c.4969del	L1657*	pathogenic
17	43094242	T	TC	BRCA1	NC_000017.11:g.43094243dup	NM_007294.4:c.1288dup	D430Gfs*6	pathogenic
17	43054613	A	T	BRCA1	NC_000017.11:g.43054613A>T	NM_007294.4:c.5277+2439T>A	?	benign
17	43061103	G	C	BRCA1	NC_000017.11:g.43061103G>C	NM_007294.4:c.5193+2230C>G	?	benign
17	43070444	T	A	BRCA1	NC_000017.11:g.43070444T>A	NM_007294.4:c.4986+484A>T	?	benign
17	43099836	C	CA	BRCA1	NC_000017.11:g.43099837dup	NM_007294.4:c.485dup	R163Efs*19	pathogenic
17	43097249	A	G	BRCA1	NC_000017.11:g.43097249A>G	NM_007294.4:c.588T>C	Y196=	likely_benign
17	43074337	C	CT	BRCA1	NC_000017.11:g.43074338dup	NM_007294.4:c.4668dup	D1557Rfs*17	pathogenic
17	43093962	C	T	BRCA1	NC_000017.11:g.43093962C>T	NM_007294.4:c.1569G>A	L523=	likely_benign
17	43093665	C	A	BRCA1	NC_000017.11:g.43093665C>A	NM_007294.4:c.1866G>T	A622=	likely_benign
17	43094202	T	C	BRCA1	NC_000017.11:g.43094202T>C	NM_007294.4:c.1329A>G	K443=	likely_benign
17	43080841	A	C	BRCA1	NC_000017.11:g.43080841A>C	NM_007294.4:c.4357+1563T>G	?	benign
17	43094007	AG	A	BRCA1	NC_000017.11:g.43094008del	NM_007294.4:c.1523del	P508Lfs*24	pathogenic
17	43096376	C	CAAAAAAAAAAA	BRCA1	NC_000017.11:g.43096377_43096387dup	NM_007294.4:c.594-465_594-455dup	?	benign
17	43093589	C	A	BRCA1	NC_000017.11:g.43093589C>A	NM_007294.4:c.1942G>T	E648*	pathogenic
17	43071022	CT	C	BRCA1	NC_000017.11:g.43071023del	NM_007294.4:c.4891del	S1631Vfs*2	pathogenic
17	43115745	A	G	BRCA1	NC_000017.11:g.43115745A>G	NM_007294.4:c.115T>C	C39R	pathogenic
17	43104160	T	A	BRCA1	NC_000017.11:g.43104160T>A	NM_007294.4:c.403A>T	K135*	pathogenic
17	43093026	A	ATGTCCCAATGGATACTT	BRCA1	NC_000017.11:g.43093027_43093043dup	NM_007294.4:c.2488_2504dup	H835Qfs*17	pathogenic
17	43093915	G	A	BRCA1	NC_000017.11:g.43093915G>A	NM_007294.4:c.1616C>T	T539M	benign
17	43093154	TC	T	BRCA1	NC_000017.11:g.43093155del	NM_007294.4:c.2376del	K793Rfs*10	pathogenic
17	43090064	GA	G	BRCA1	NC_000017.11:g.43090065del	NM_007294.4:c.4185+879del	?	benign
17	43085058	T	C	BRCA1	NC_000017.11:g.43085058T>C	NM_007294.4:c.4186-2483A>G	?	benign
17	43057601	C	T	BRCA1	NC_000017.11:g.43057601C>T	NM_007294.4:c.5194-466G>A	?	benign
17	43091020	G	GAGAT	BRCA1	NC_000017.11:g.43091020_43091021insAGAT	NM_007294.4:c.4108_4109insATCT	S1370Yfs*5	pathogenic
17	43051079	GA	G	BRCA1	NC_000017.11:g.43051080del	NM_007294.4:c.5315del	F1772Sfs*21	pathogenic
17	43094556	C	T	BRCA1	NC_000017.11:g.43094556C>T	NM_007294.4:c.975G>A	K325=	likely_benign
17	43091697	CT	C	BRCA1	NC_000017.11:g.43091698del	NM_007294.4:c.3833del	K1278Rfs*29	pathogenic
17	43045642	G	C	BRCA1	NC_000017.11:g.43045642G>C	NM_007294.4:c.*36C>G	?	benign
17	43092521	C	A	BRCA1	NC_000017.11:g.43092521C>A	NM_007294.4:c.3010G>T	E1004*	pathogenic
17	43045759	CCA	C	BRCA1	NC_000017.11:g.43045760_43045761del	NM_007294.4:c.5509_5510del	W1837Gfs*42	pathogenic
17	43094601	CT	C	BRCA1	NC_000017.11:g.43094602del	NM_007294.4:c.929del	Q310Rfs*4	pathogenic
17	43078359	A	G	BRCA1	NC_000017.11:g.43078359A>G	NM_007294.4:c.4358-1745T>C	?	benign
17	43093428	CTT	C	BRCA1	NC_000017.11:g.43093429_43093430del	NM_007294.4:c.2101_2102del	K701Vfs*10	pathogenic
17	43057118	T	TG	BRCA1	NC_000017.11:g.43057118_43057119insG	NM_007294.4:c.5210_5211insC	R1737Sfs*93	pathogenic
17	43093294	T	TC	BRCA1	NC_000017.11:g.43093295dup	NM_007294.4:c.2236dup	D746Gfs*16	pathogenic
17	43048092	T	C	BRCA1	NC_000017.11:g.43048092T>C	NM_007294.4:c.5407-389A>G	?	benign
17	43092316	AG	A	BRCA1	NC_000017.11:g.43092317del	NM_007294.4:c.3214del	L1072*	pathogenic
17	43091464	TGATTA	T	BRCA1	NC_000017.11:g.43091465_43091469del	NM_007294.4:c.4062_4066del	N1354Kfs*12	pathogenic
17	43092882	TGCA	T	BRCA1	NC_000017.11:g.43092883_43092885del	NM_007294.4:c.2646_2648del	C882*	pathogenic
17	43092953	T	TAA	BRCA1	NC_000017.11:g.43092953_43092954insAA	NM_007294.4:c.2577_2578insTT	T860Lfs*34	pathogenic
17	43091012	CA	C	BRCA1	NC_000017.11:g.43091013del	NM_007294.4:c.4116del	C1372Wfs*21	pathogenic
17	43092836	C	CT	BRCA1	NC_000017.11:g.43092837dup	NM_007294.4:c.2694dup	V899Sfs*4	pathogenic
17	43094635	ACATTC	GA	BRCA1	NC_000017.11:g.43094635_43094640delinsGA	NM_007294.4:c.891_896delinsTC	M297Ifs*16	pathogenic
17	43093824	G	A	BRCA1	NC_000017.11:g.43093824G>A	NM_007294.4:c.1707C>T	N569=	likely_benign
17	43045711	G	GT	BRCA1	NC_000017.11:g.43045712dup	NM_007294.4:c.5558dup	Y1853*	pathogenic
17	43093140	TTC	T	BRCA1	NC_000017.11:g.43093141_43093142del	NM_007294.4:c.2389_2390del	E797Tfs*3	pathogenic
17	43092609	TAA	T	BRCA1	NC_000017.11:g.43092610_43092611del	NM_007294.4:c.2920_2921del	L974Tfs*17	pathogenic
17	43071113	T	A	BRCA1	NC_000017.11:g.43071113T>A	NM_007294.4:c.4801A>T	K1601*	pathogenic
17	43094115	G	A	BRCA1	NC_000017.11:g.43094115G>A	NM_007294.4:c.1416C>T	P472=	likely_benign
17	43091030	C	A	BRCA1	NC_000017.11:g.43091030C>A	NM_007294.4:c.4099G>T	E1367*	pathogenic
17	43045763	TCTCGGGTCAC	T	BRCA1	NC_000017.11:g.43045764_43045773del	NM_007294.4:c.5497_5506del	V1833Sfs*7	pathogenic
17	43094145	C	T	BRCA1	NC_000017.11:g.43094145C>T	NM_007294.4:c.1386G>A	G462=	likely_benign
17	43091714	G	A	BRCA1	NC_000017.11:g.43091714G>A	NM_007294.4:c.3817C>T	Q1273*	pathogenic
17	43094197	TC	T	BRCA1	NC_000017.11:g.43094198del	NM_007294.4:c.1333del	E445Kfs*8	pathogenic
17	43094544	ATT	A	BRCA1	NC_000017.11:g.43094545_43094546del	NM_007294.4:c.985_986del	N329*	pathogenic
17	43092221	T	TG	BRCA1	NC_000017.11:g.43092221_43092222insG	NM_007294.4:c.3309_3310insC	K1104Qfs*4	pathogenic
17	43094185	GAGTGAACTCTTTCACTTTT	G	BRCA1	NC_000017.11:g.43094186_43094204del	NM_007294.4:c.1327_1345del	K443Pfs*4	pathogenic
17	43091636	G	A	BRCA1	NC_000017.11:g.43091636G>A	NM_007294.4:c.3895C>T	Q1299*	pathogenic
17	43067715	T	C	BRCA1	NC_000017.11:g.43067715T>C	NM_007294.4:c.4987-20A>G	?	benign
17	43115775	CCA	C	BRCA1	NC_000017.11:g.43115776_43115777del	NM_007294.4:c.83_84del	L28Rfs*12	pathogenic
17	43063365	G	A	BRCA1	NC_000017.11:g.43063365G>A	NM_007294.4:c.5161C>T	Q1721*	pathogenic
17	43091604	AT	A	BRCA1	NC_000017.11:g.43091605del	NM_007294.4:c.3926del	N1309Ifs*9	pathogenic
17	43124024	G	GAGAC	BRCA1	NC_000017.11:g.43124024_43124025insAGAC	NM_007294.4:c.72_73insGTCT	P25Vfs*17	pathogenic
17	43055023	C	G	BRCA1	NC_000017.11:g.43055023C>G	NM_007294.4:c.5277+2029G>C	?	benign
17	43093802	C	CT	BRCA1	NC_000017.11:g.43093803dup	NM_007294.4:c.1728dup	E577Rfs*9	pathogenic
17	43094395	ATGCT	A	BRCA1	NC_000017.11:g.43094396_43094399del	NM_007294.4:c.1132_1135del	S378Ffs*15	pathogenic
17	43094742	A	AC	BRCA1	NC_000017.11:g.43094743dup	NM_007294.4:c.788dup	S264*	pathogenic
17	43060996	C	T	BRCA1	NC_000017.11:g.43060996C>T	NM_007294.4:c.5193+2337G>A	?	benign
17	43090967	G	A	BRCA1	NC_000017.11:g.43090967G>A	NM_007294.4:c.4162C>T	Q1388*	pathogenic
17	43071075	A	AG	BRCA1	NC_000017.11:g.43071075_43071076insG	NM_007294.4:c.4838_4839insC	P1614Sfs*8	pathogenic
17	43094423	C	CAG	BRCA1	NC_000017.11:g.43094423_43094424insAG	NM_007294.4:c.1107_1108insCT	V370Lfs*5	pathogenic
17	43092980	C	A	BRCA1	NC_000017.11:g.43092980C>A	NM_007294.4:c.2551G>T	E851*	pathogenic
17	43093440	GA	G	BRCA1	NC_000017.11:g.43093441del	NM_007294.4:c.2090del	F697Sfs*4	pathogenic
17	43112129	G	A	BRCA1	NC_000017.11:g.43112129G>A	NM_007294.4:c.134+3597C>T	?	benign
17	43071216	A	AT	BRCA1	NC_000017.11:g.43071216_43071217insT	NM_007294.4:c.4697_4698insA	G1567Wfs*7	pathogenic
17	43093450	CTG	C	BRCA1	NC_000017.11:g.43093451_43093452del	NM_007294.4:c.2079_2080del	D693Efs*18	pathogenic
17	43092550	CA	C	BRCA1	NC_000017.11:g.43092551del	NM_007294.4:c.2980del	C994Vfs*6	pathogenic
17	43059207	C	T	BRCA1	NC_000017.11:g.43059207C>T	NM_007294.4:c.5194-2072G>A	?	benign
17	43045744	TA	T	BRCA1	NC_000017.11:g.43045745del	NM_007294.4:c.5525del	V1842Efs*13	pathogenic
17	43076497	CCTGGTTCTTTATTTTTACTGGT	C	BRCA1	NC_000017.11:g.43076498_43076519del	NM_007294.4:c.4453_4474del	T1485Efs*13	pathogenic
17	43092024	G	GT	BRCA1	NC_000017.11:g.43092025dup	NM_007294.4:c.3506dup	D1169Efs*3	pathogenic
17	43106508	G	A	BRCA1	NC_000017.11:g.43106508G>A	NM_007294.4:c.160C>T	Q54*	pathogenic
17	43094763	C	T	BRCA1	NC_000017.11:g.43094763C>T	NM_007294.4:c.768G>A	R256=	likely_benign
17	43093569	CT	C	BRCA1	NC_000017.11:g.43093570del	NM_007294.4:c.1961del	K654Sfs*47	pathogenic
17	43092620	GT	G	BRCA1	NC_000017.11:g.43092621del	NM_007294.4:c.2910del	K970Nfs*30	pathogenic
17	43093964	A	AG	BRCA1	NC_000017.11:g.43093964_43093965insG	NM_007294.4:c.1566_1567insC	A524Gfs*7	pathogenic
17	43092809	C	A	BRCA1	NC_000017.11:g.43092809C>A	NM_007294.4:c.2722G>T	E908*	pathogenic
17	43093581	T	TA	BRCA1	NC_000017.11:g.43093582dup	NM_007294.4:c.1949dup	K652Efs*21	pathogenic
17	43092106	GC	G	BRCA1	NC_000017.11:g.43092107del	NM_007294.4:c.3424del	A1142Hfs*13	pathogenic
17	43094568	C	T	BRCA1	NC_000017.11:g.43094568C>T	NM_007294.4:c.963G>A	W321*	pathogenic
17	43092967	T	TGC	BRCA1	NC_000017.11:g.43092967_43092968insGC	NM_007294.4:c.2563_2564insGC	Q855Rfs*39	pathogenic
17	43104165	CG	C	BRCA1	NC_000017.11:g.43104166del	NM_007294.4:c.397del	R133Vfs*30	pathogenic
17	43092669	T	G	BRCA1	NC_000017.11:g.43092669T>G	NM_007294.4:c.2862A>C	L954=	likely_benign
17	43093179	CGA	C	BRCA1	NC_000017.11:g.43093180_43093181del	NM_007294.4:c.2350_2351del	S784Vfs*5	pathogenic
17	43067324	G	T	BRCA1	NC_000017.11:g.43067324G>T	NM_007294.4:c.5074+284C>A	?	benign
17	43091755	TTC	T	BRCA1	NC_000017.11:g.43091756_43091757del	NM_007294.4:c.3774_3775del	N1259Ffs*7	pathogenic
17	43071158	CTG	C	BRCA1	NC_000017.11:g.43071159_43071160del	NM_007294.4:c.4754_4755del	P1585Rfs*36	pathogenic
17	43095587	A	C	BRCA1	NC_000017.11:g.43095587A>C	NM_007294.4:c.670+259T>G	?	benign
17	43106527	G	A	BRCA1	NC_000017.11:g.43106527G>A	NM_007294.4:c.141C>T	C47=	likely_benign
17	43092725	CT	C	BRCA1	NC_000017.11:g.43092726del	NM_007294.4:c.2805del	D936Ifs*64	pathogenic
17	43051115	G	T	BRCA1	NC_000017.11:g.43051115G>T	NM_007294.4:c.5280C>A	I1760=	likely_benign
17	43092200	GCT	G	BRCA1	NC_000017.11:g.43092201_43092202del	NM_007294.4:c.3329_3330del	K1110Tfs*4	pathogenic
17	43082412	G	GA	BRCA1	NC_000017.11:g.43082413dup	NM_007294.4:c.4348dup	S1450Ffs*12	pathogenic
17	43093137	TG	T	BRCA1	NC_000017.11:g.43093138del	NM_007294.4:c.2393del	P798Qfs*5	pathogenic
17	43092680	T	TA	BRCA1	NC_000017.11:g.43092681dup	NM_007294.4:c.2850dup	R951*	pathogenic
17	43094634	TAC	T	BRCA1	NC_000017.11:g.43094635_43094636del	NM_007294.4:c.895_896del	V299Rfs*4	pathogenic
17	43092854	T	A	BRCA1	NC_000017.11:g.43092854T>A	NM_007294.4:c.2677A>T	K893*	pathogenic
17	43092051	CTT	C	BRCA1	NC_000017.11:g.43092052_43092053del	NM_007294.4:c.3478_3479del	K1160Gfs*4	pathogenic
17	43104245	AT	A	BRCA1	NC_000017.11:g.43104246del	NM_007294.4:c.317del	N106Ifs*13	pathogenic
17	43047680	C	T	BRCA1	NC_000017.11:g.43047680C>T	NM_007294.4:c.5430G>A	V1810=	likely_benign
17	43076516	TGGTA	T	BRCA1	NC_000017.11:g.43076517_43076520del	NM_007294.4:c.4452_4455del	T1485Vfs*19	pathogenic
17	43091783	C	A	BRCA1	NC_000017.11:g.43091783C>A	NM_007294.4:c.3748G>T	E1250*	pathogenic
17	43092070	A	C	BRCA1	NC_000017.11:g.43092070A>C	NM_007294.4:c.3461T>G	L1154*	pathogenic
17	43094196	T	C	BRCA1	NC_000017.11:g.43094196T>C	NM_007294.4:c.1335A>G	E445=	likely_benign
17	43049172	C	CTG	BRCA1	NC_000017.11:g.43049173_43049174dup	NM_007294.4:c.5353_5354dup	Q1785Hfs*9	pathogenic
17	43082519	T	C	BRCA1	NC_000017.11:g.43082519T>C	NM_007294.4:c.4242A>G	L1414=	likely_benign
17	43093364	TG	T	BRCA1	NC_000017.11:g.43093365del	NM_007294.4:c.2166del	N723Ifs*13	pathogenic
17	43091477	C	A	BRCA1	NC_000017.11:g.43091477C>A	NM_007294.4:c.4054G>T	E1352*	pathogenic
17	43052001	T	C	BRCA1	NC_000017.11:g.43052001T>C	NM_007294.4:c.5278-884A>G	?	benign
17	43092108	A	G	BRCA1	NC_000017.11:g.43092108A>G	NM_007294.4:c.3423T>C	H1141=	likely_benign
17	43082428	GAT	G	BRCA1	NC_000017.11:g.43082429_43082430del	NM_007294.4:c.4331_4332del	N1444Tfs*17	pathogenic
17	43071101	A	G	BRCA1	NC_000017.11:g.43071101A>G	NM_007294.4:c.4813T>C	L1605=	likely_benign
17	43047690	AT	A	BRCA1	NC_000017.11:g.43047691del	NM_007294.4:c.5419del	I1807Lfs*27	pathogenic
17	43094252	C	A	BRCA1	NC_000017.11:g.43094252C>A	NM_007294.4:c.1279G>T	E427*	pathogenic
17	43106469	C	A	BRCA1	NC_000017.11:g.43106469C>A	NM_007294.4:c.199G>T	D67Y	benign
17	43092837	TTTTGGAC	T	BRCA1	NC_000017.11:g.43092838_43092844del	NM_007294.4:c.2687_2693del	S896Kfs*102	pathogenic
17	43078211	G	A	BRCA1	NC_000017.11:g.43078211G>A	NM_007294.4:c.4358-1597C>T	?	benign
17	43091981	CTTT	ATC	BRCA1	NC_000017.11:g.43091981_43091984delinsATC	NM_007294.4:c.3547_3550delinsGAT	K1183Dfs*27	pathogenic
17	43093313	CTT	C	BRCA1	NC_000017.11:g.43093314_43093315del	NM_007294.4:c.2216_2217del	K739Sfs*3	pathogenic
17	43093712	T	A	BRCA1	NC_000017.11:g.43093712T>A	NM_007294.4:c.1819A>T	K607*	pathogenic
17	43094422	ACAT	A	BRCA1	NC_000017.11:g.43094423_43094425del	NM_007294.4:c.1106_1108del	D369del	benign
17	43093967	CTGC	TTTA	BRCA1	NC_000017.11:g.43093967_43093970delinsTTTA	NM_007294.4:c.1561_1564delinsTAAA	A521*	pathogenic
17	43091602	G	GT	BRCA1	NC_000017.11:g.43091603dup	NM_007294.4:c.3928dup	T1310Nfs*20	pathogenic
17	43094485	T	TGTGA	BRCA1	NC_000017.11:g.43094485_43094486insGTGA	NM_007294.4:c.1045_1046insTCAC	E349Vfs*8	pathogenic
17	43115771	A	T	BRCA1	NC_000017.11:g.43115771A>T	NM_007294.4:c.89T>A	L30*	pathogenic
17	43091904	TA	T	BRCA1	NC_000017.11:g.43091905del	NM_007294.4:c.3626del	L1209*	pathogenic
17	43094431	G	GT	BRCA1	NC_000017.11:g.43094432dup	NM_007294.4:c.1099dup	T367Nfs*2	pathogenic
17	43091904	T	TA	BRCA1	NC_000017.11:g.43091905dup	NM_007294.4:c.3626dup	L1209Ffs*10	pathogenic
17	43093619	C	A	BRCA1	NC_000017.11:g.43093619C>A	NM_007294.4:c.1912G>T	E638*	pathogenic
17	43049685	C	T	BRCA1	NC_000017.11:g.43049685C>T	NM_007294.4:c.5333-491G>A	?	benign
17	43093652	C	CACTA	BRCA1	NC_000017.11:g.43093652_43093653insACTA	NM_007294.4:c.1878_1879insTAGT	V627*	pathogenic
17	43099827	CAG	C	BRCA1	NC_000017.11:g.43099828_43099829del	NM_007294.4:c.493_494del	L165Efs*16	pathogenic
17	43067697	T	C	BRCA1	NC_000017.11:g.43067697T>C	NM_007294.4:c.4987-2A>G	?	pathogenic
17	43092189	TTCA	T	BRCA1	NC_000017.11:g.43092190_43092192del	NM_007294.4:c.3339_3341del	Y1113*	pathogenic
17	43091474	C	A	BRCA1	NC_000017.11:g.43091474C>A	NM_007294.4:c.4057G>T	E1353*	pathogenic
17	43093529	G	GT	BRCA1	NC_000017.11:g.43093530dup	NM_007294.4:c.2001dup	L668Tfs*5	pathogenic
17	43074452	C	T	BRCA1	NC_000017.11:g.43074452C>T	NM_007294.4:c.4554G>A	Q1518=	likely_benign
17	43093491	C	CGG	BRCA1	NC_000017.11:g.43093491_43093492insGG	NM_007294.4:c.2039_2040insCC	K680Nfs*22	pathogenic
17	43093436	C	A	BRCA1	NC_000017.11:g.43093436C>A	NM_007294.4:c.2095G>T	E699*	pathogenic
17	43071135	TATGT	G	BRCA1	NC_000017.11:g.43071135_43071139delinsG	NM_007294.4:c.4775_4779delinsC	N1592Tfs*8	pathogenic
17	43094138	A	AG	BRCA1	NC_000017.11:g.43094139dup	NM_007294.4:c.1392dup	Y465Lfs*15	pathogenic
17	43093931	G	A	BRCA1	NC_000017.11:g.43093931G>A	NM_007294.4:c.1600C>T	Q534*	pathogenic
17	43094352	TAACA	T	BRCA1	NC_000017.11:g.43094353_43094356del	NM_007294.4:c.1175_1178del	L392Qfs*17	pathogenic
17	43093097	T	A	BRCA1	NC_000017.11:g.43093097T>A	NM_007294.4:c.2434A>T	K812*	pathogenic
17	43104878	T	C	BRCA1	NC_000017.11:g.43104878T>C	NM_007294.4:c.291A>G	T97=	likely_benign
17	43093941	TTCAGGAG	T	BRCA1	NC_000017.11:g.43093942_43093948del	NM_007294.4:c.1583_1589del	T528Kfs*2	pathogenic
17	43092632	TA	T	BRCA1	NC_000017.11:g.43092633del	NM_007294.4:c.2898del	T967Lfs*33	pathogenic
17	43047161	G	A	BRCA1	NC_000017.11:g.43047161G>A	NM_007294.4:c.5467+482C>T	?	benign
17	43076580	A	T	BRCA1	NC_000017.11:g.43076580A>T	NM_007294.4:c.4392T>A	P1464=	likely_benign
17	43094148	A	T	BRCA1	NC_000017.11:g.43094148A>T	NM_007294.4:c.1383T>A	F461L	benign
17	43071204	GAGGCTGATTC	T	BRCA1	NC_000017.11:g.43071204_43071214delinsT	NM_007294.4:c.4700_4710delinsA	G1567Dfs*31	pathogenic
17	43047692	TG	T	BRCA1	NC_000017.11:g.43047693del	NM_007294.4:c.5417del	P1806Qfs*28	pathogenic
17	43094289	G	GT	BRCA1	NC_000017.11:g.43094290dup	NM_007294.4:c.1241dup	D414Efs*5	pathogenic
17	43094445	C	CT	BRCA1	NC_000017.11:g.43094446dup	NM_007294.4:c.1085dup	N363Efs*3	pathogenic
17	43060321	A	C	BRCA1	NC_000017.11:g.43060321A>C	NM_007294.4:c.5193+3012T>G	?	benign
17	43057558	G	A	BRCA1	NC_000017.11:g.43057558G>A	NM_007294.4:c.5194-423C>T	?	benign
17	43082543	C	T	BRCA1	NC_000017.11:g.43082543C>T	NM_007294.4:c.4218G>A	K1406=	likely_benign
17	43092274	A	C	BRCA1	NC_000017.11:g.43092274A>C	NM_007294.4:c.3257T>G	L1086*	pathogenic
17	43091775	CAG	C	BRCA1	NC_000017.11:g.43091776_43091777del	NM_007294.4:c.3754_3755del	L1252Vfs*2	pathogenic
17	43093319	CTG	C	BRCA1	NC_000017.11:g.43093320_43093321del	NM_007294.4:c.2210_2211del	T737Sfs*2	pathogenic
17	43091960	TA	T	BRCA1	NC_000017.11:g.43091961del	NM_007294.4:c.3570del	S1191Afs*19	pathogenic
17	43094512	AC	A	BRCA1	NC_000017.11:g.43094513del	NM_007294.4:c.1018del	V340*	pathogenic
17	43071205	AGGCTGATTCC	A	BRCA1	NC_000017.11:g.43071206_43071215del	NM_007294.4:c.4699_4708del	G1567Sfs*31	pathogenic
17	43106457	T	C	BRCA1	NC_000017.11:g.43106457T>C	NM_007294.4:c.211A>G	R71G	pathogenic
17	43093513	TC	T	BRCA1	NC_000017.11:g.43093514del	NM_007294.4:c.2017del	E673Nfs*28	pathogenic
17	43088260	T	C	BRCA1	NC_000017.11:g.43088260T>C	NM_007294.4:c.4185+2684A>G	?	benign
17	43092667	G	C	BRCA1	NC_000017.11:g.43092667G>C	NM_007294.4:c.2864C>G	S955*	pathogenic
17	43092722	T	A	BRCA1	NC_000017.11:g.43092722T>A	NM_007294.4:c.2809A>T	K937*	pathogenic
17	43057104	TTGAC	T	BRCA1	NC_000017.11:g.43057105_43057108del	NM_007294.4:c.5221_5224del	V1741Mfs*23	pathogenic
17	43092827	CAA	C	BRCA1	NC_000017.11:g.43092828_43092829del	NM_007294.4:c.2702_2703del	F901*	pathogenic
17	43092859	GA	G	BRCA1	NC_000017.11:g.43092860del	NM_007294.4:c.2671del	S891Pfs*2	pathogenic
17	43074479	G	T	BRCA1	NC_000017.11:g.43074479G>T	NM_007294.4:c.4527C>A	Y1509*	pathogenic
17	43091540	G	A	BRCA1	NC_000017.11:g.43091540G>A	NM_007294.4:c.3991C>T	Q1331*	pathogenic
17	43076600	G	A	BRCA1	NC_000017.11:g.43076600G>A	NM_007294.4:c.4372C>T	Q1458*	pathogenic
17	43106492	G	T	BRCA1	NC_000017.11:g.43106492G>T	NM_007294.4:c.176C>A	S59*	pathogenic
17	43093584	C	T	BRCA1	NC_000017.11:g.43093584C>T	NM_007294.4:c.1947G>A	E649=	likely_benign
17	43104083	AAAG	A	BRCA1	NC_000017.11:g.43104084_43104086del	NM_007294.4:c.441+36_441+38del	?	benign
17	43102706	G	A	BRCA1	NC_000017.11:g.43102706G>A	NM_007294.4:c.441+1416C>T	?	benign
17	43074584	G	C	BRCA1	NC_000017.11:g.43074584G>C	NM_007294.4:c.4485-63C>G	?	benign
17	43076573	G	A	BRCA1	NC_000017.11:g.43076573G>A	NM_007294.4:c.4399C>T	Q1467*	pathogenic
17	43091481	G	GC	BRCA1	NC_000017.11:g.43091482dup	NM_007294.4:c.4049dup	E1352Gfs*4	pathogenic
17	43092249	A	C	BRCA1	NC_000017.11:g.43092249A>C	NM_007294.4:c.3282T>G	Y1094*	pathogenic
17	43091015	AC	A	BRCA1	NC_000017.11:g.43091016del	NM_007294.4:c.4113del	C1372Vfs*21	pathogenic
17	43094694	A	G	BRCA1	NC_000017.11:g.43094694A>G	NM_007294.4:c.837T>C	H279=	likely_benign
17	43103842	C	T	BRCA1	NC_000017.11:g.43103842C>T	NM_007294.4:c.441+280G>A	?	benign
17	43091914	GC	G	BRCA1	NC_000017.11:g.43091915del	NM_007294.4:c.3616del	A1206Pfs*4	pathogenic
17	43094550	T	C	BRCA1	NC_000017.11:g.43094550T>C	NM_007294.4:c.981A>G	T327=	benign
17	43094438	T	A	BRCA1	NC_000017.11:g.43094438T>A	NM_007294.4:c.1093A>T	R365*	pathogenic
17	43106474	TTACA	T	BRCA1	NC_000017.11:g.43106475_43106478del	NM_007294.4:c.190_193del	C64Rfs*4	pathogenic
17	43094418	AG	A	BRCA1	NC_000017.11:g.43094419del	NM_007294.4:c.1112del	P371Lfs*3	pathogenic
17	43071204	G	A	BRCA1	NC_000017.11:g.43071204G>A	NM_007294.4:c.4710C>T	L1570=	likely_benign
17	43093334	C	A	BRCA1	NC_000017.11:g.43093334C>A	NM_007294.4:c.2197G>T	E733*	pathogenic
17	43122888	AG	A	BRCA1	NC_000017.11:g.43122889del	NM_007294.4:c.80+1128del	?	benign
17	43091705	A	G	BRCA1	NC_000017.11:g.43091705A>G	NM_007294.4:c.3826T>C	L1276=	likely_benign
17	43092578	GAA	G	BRCA1	NC_000017.11:g.43092579_43092580del	NM_007294.4:c.2951_2952del	F984Sfs*7	pathogenic
17	43091705	A	AT	BRCA1	NC_000017.11:g.43091706dup	NM_007294.4:c.3825dup	L1276Ifs*11	pathogenic
17	43071035	C	CA	BRCA1	NC_000017.11:g.43071036dup	NM_007294.4:c.4878dup	A1627Cfs*52	pathogenic
17	43093000	CTT	C	BRCA1	NC_000017.11:g.43093001_43093002del	NM_007294.4:c.2529_2530del	S844Hfs*7	pathogenic
17	43092572	T	A	BRCA1	NC_000017.11:g.43092572T>A	NM_007294.4:c.2959A>T	K987*	pathogenic
17	43093689	C	T	BRCA1	NC_000017.11:g.43093689C>T	NM_007294.4:c.1842G>A	K614=	likely_benign
17	43094289	G	A	BRCA1	NC_000017.11:g.43094289G>A	NM_007294.4:c.1242C>T	D414=	likely_benign
17	43049137	G	C	BRCA1	NC_000017.11:g.43049137G>C	NM_007294.4:c.5390C>G	S1797*	pathogenic
17	43092032	CA	C	BRCA1	NC_000017.11:g.43092033del	NM_007294.4:c.3498del	E1167Kfs*43	pathogenic
17	43092641	C	A	BRCA1	NC_000017.11:g.43092641C>A	NM_007294.4:c.2890G>T	G964*	pathogenic
17	43124230	A	G	BRCA1	NC_000017.11:g.43124230A>G	NM_007294.4:c.-19-115T>C	?	benign
17	43093219	A	AG	BRCA1	NC_000017.11:g.43093219_43093220insG	NM_007294.4:c.2311_2312insC	L771Sfs*6	pathogenic
17	43092409	G	C	BRCA1	NC_000017.11:g.43092409G>C	NM_007294.4:c.3122C>G	S1041*	pathogenic
17	43074512	AG	A	BRCA1	NC_000017.11:g.43074513del	NM_007294.4:c.4493del	P1498Lfs*7	pathogenic
17	43092780	GA	G	BRCA1	NC_000017.11:g.43092781del	NM_007294.4:c.2750del	I917Tfs*83	pathogenic
17	43104911	T	C	BRCA1	NC_000017.11:g.43104911T>C	NM_007294.4:c.258A>G	L86=	likely_benign
17	43092192	A	C	BRCA1	NC_000017.11:g.43092192A>C	NM_007294.4:c.3339T>G	Y1113*	pathogenic
17	43093830	AT	A	BRCA1	NC_000017.11:g.43093831del	NM_007294.4:c.1700del	N567Ifs*5	pathogenic
17	43074397	G	A	BRCA1	NC_000017.11:g.43074397G>A	NM_007294.4:c.4609C>T	Q1537*	pathogenic
17	43066690	C	T	BRCA1	NC_000017.11:g.43066690C>T	NM_007294.4:c.5074+918G>A	?	benign
17	43074435	GA	G	BRCA1	NC_000017.11:g.43074436del	NM_007294.4:c.4570del	S1524Lfs*24	pathogenic
17	43091529	ACCAACTC	A	BRCA1	NC_000017.11:g.43091530_43091536del	NM_007294.4:c.3995_4001del	G1332Vfs*2	pathogenic
17	43090950	G	A	BRCA1	NC_000017.11:g.43090950G>A	NM_007294.4:c.4179C>T	T1393=	likely_benign
17	43074353	A	G	BRCA1	NC_000017.11:g.43074353A>G	NM_007294.4:c.4653T>C	S1551=	likely_benign
17	43094204	T	A	BRCA1	NC_000017.11:g.43094204T>A	NM_007294.4:c.1327A>T	K443*	pathogenic
[truncated: 1,324 more rows]

## Sheet: BRCA2 (training)
chromosome	position	ref_allele	alt_allele	gene_symbol	hgvs_genomic_38	hgvs_coding	hgvs_protein	pathogenicity_original
13	32340862	CAA	C	BRCA2	NC_000013.11:g.32340864_32340865del	NM_000059.4:c.6509_6510del	K2170Sfs*5	pathogenic
13	32340685	TAAGAG	T	BRCA2	NC_000013.11:g.32340688_32340692del	NM_000059.4:c.6333_6337del	R2112Pfs*15	pathogenic
13	32327154	T	C	BRCA2	NC_000013.11:g.32327154T>C	NM_000059.4:c.631+541T>C	?	benign
13	32363491	T	TG	BRCA2	NC_000013.11:g.32363492dup	NM_000059.4:c.8290dup	A2764Gfs*6	pathogenic
13	32337614	ACC	A	BRCA2	NC_000013.11:g.32337617_32337618del	NM_000059.4:c.3262_3263del	P1088Sfs*10	pathogenic
13	32371015	G	A	BRCA2	NC_000013.11:g.32371015G>A	NM_000059.4:c.8547G>A	K2849=	likely_benign
13	32340737	A	T	BRCA2	NC_000013.11:g.32340737A>T	NM_000059.4:c.6382A>T	K2128*	pathogenic
13	32340469	T	C	BRCA2	NC_000013.11:g.32340469T>C	NM_000059.4:c.6114T>C	H2038=	likely_benign
13	32387951	C	T	BRCA2	NC_000013.11:g.32387951C>T	NM_000059.4:c.9257-6738C>T	?	benign
13	32339720	A	T	BRCA2	NC_000013.11:g.32339720A>T	NM_000059.4:c.5365A>T	K1789*	pathogenic
13	32340868	GTC	G	BRCA2	NC_000013.11:g.32340869_32340870del	NM_000059.4:c.6514_6515del	S2172Tfs*3	pathogenic
13	32337130	T	C	BRCA2	NC_000013.11:g.32337130T>C	NM_000059.4:c.2775T>C	S925=	likely_benign
13	32337188	A	ATT	BRCA2	NC_000013.11:g.32337188_32337189insTT	NM_000059.4:c.2833_2834insTT	K945Ifs*16	pathogenic
13	32363258	CT	C	BRCA2	NC_000013.11:g.32363260del	NM_000059.4:c.8058del	V2687Ffs*7	pathogenic
13	32370973	A	G	BRCA2	NC_000013.11:g.32370973A>G	NM_000059.4:c.8505A>G	S2835=	likely_benign
13	32339815	C	T	BRCA2	NC_000013.11:g.32339815C>T	NM_000059.4:c.5460C>T	C1820=	likely_benign
13	32326143	TA	T	BRCA2	NC_000013.11:g.32326145del	NM_000059.4:c.470del	K157Sfs*15	pathogenic
13	32336893	A	G	BRCA2	NC_000013.11:g.32336893A>G	NM_000059.4:c.2538A>G	S846=	likely_benign
13	32339570	T	TA	BRCA2	NC_000013.11:g.32339571dup	NM_000059.4:c.5216dup	Y1739*	pathogenic
13	32339176	TGA	C	BRCA2	NC_000013.11:g.32339176_32339178delinsC	NM_000059.4:c.4821_4823delinsC	E1608Dfs*6	pathogenic
13	32379849	GTA	G	BRCA2	NC_000013.11:g.32379850_32379851del	NM_000059.4:c.9054_9055del	S3018Rfs*3	pathogenic
13	32336948	GAAGA	G	BRCA2	NC_000013.11:g.32336951_32336954del	NM_000059.4:c.2596_2599del	E866Lfs*7	pathogenic
13	32379781	T	TTAGA	BRCA2	NC_000013.11:g.32379782_32379783insAGAT	NM_000059.4:c.8986_8987insAGAT	L2996*	pathogenic
13	32366979	G	T	BRCA2	NC_000013.11:g.32366979G>T	NM_000059.4:c.8332-3423G>T	?	benign
13	32338907	GA	G	BRCA2	NC_000013.11:g.32338909del	NM_000059.4:c.4554del	E1518Dfs*25	pathogenic
13	32338423	G	A	BRCA2	NC_000013.11:g.32338423G>A	NM_000059.4:c.4068G>A	L1356=	benign
13	32346707	T	C	BRCA2	NC_000013.11:g.32346707T>C	NM_000059.4:c.6938-120T>C	?	benign
13	32338000	GTT	TA	BRCA2	NC_000013.11:g.32338000_32338002delinsTA	NM_000059.4:c.3645_3647delinsTA	F1216Ifs*12	pathogenic
13	32363488	T	G	BRCA2	NC_000013.11:g.32363488T>G	NM_000059.4:c.8286T>G	P2762=	likely_benign
13	32337535	C	T	BRCA2	NC_000013.11:g.32337535C>T	NM_000059.4:c.3180C>T	S1060=	likely_benign
13	32341421	T	C	BRCA2	NC_000013.11:g.32341421T>C	NM_000059.4:c.6841+225T>C	?	benign
13	32325331	G	T	BRCA2	NC_000013.11:g.32325331G>T	NM_000059.4:c.425+147G>T	?	benign
13	32339699	CAA	C	BRCA2	NC_000013.11:g.32339705_32339706del	NM_000059.4:c.5350_5351del	N1784Hfs*2	pathogenic
13	32379777	C	CAGAT	BRCA2	NC_000013.11:g.32379778_32379781dup	NM_000059.4:c.8982_8985dup	L2996Rfs*23	pathogenic
13	32398570	T	C	BRCA2	NC_000013.11:g.32398570T>C	NM_000059.4:c.10057T>C	L3353=	likely_benign
13	32379315	AG	A	BRCA2	NC_000013.11:g.32379318del	NM_000059.4:c.8756del	G2919Vfs*8	pathogenic
13	32319276	G	A	BRCA2	NC_000013.11:g.32319276G>A	NM_000059.4:c.267G>A	P89=	likely_benign
13	32335965	T	C	BRCA2	NC_000013.11:g.32335965T>C	NM_000059.4:c.1910-300T>C	?	benign
13	32372996	C	CT	BRCA2	NC_000013.11:g.32373010dup	NM_000059.4:c.8632+1910dup	?	benign
13	32370555	C	T	BRCA2	NC_000013.11:g.32370555C>T	NM_000059.4:c.8485C>T	Q2829*	pathogenic
13	32339680	A	AT	BRCA2	NC_000013.11:g.32339682dup	NM_000059.4:c.5327dup	L1776Ffs*5	pathogenic
13	32370492	C	CT	BRCA2	NC_000013.11:g.32370496dup	NM_000059.4:c.8426dup	S2810Qfs*2	pathogenic
13	32380604	T	A	BRCA2	NC_000013.11:g.32380604T>A	NM_000059.4:c.9256+459T>A	?	benign
13	32332731	C	G	BRCA2	NC_000013.11:g.32332731C>G	NM_000059.4:c.1253C>G	S418*	pathogenic
13	32338724	T	C	BRCA2	NC_000013.11:g.32338724T>C	NM_000059.4:c.4369T>C	L1457=	likely_benign
13	32332536	C	G	BRCA2	NC_000013.11:g.32332536C>G	NM_000059.4:c.1058C>G	S353*	pathogenic
13	32338238	C	T	BRCA2	NC_000013.11:g.32338238C>T	NM_000059.4:c.3883C>T	Q1295*	pathogenic
13	32355079	CT	C	BRCA2	NC_000013.11:g.32355083del	NM_000059.4:c.7230del	F2410Lfs*57	pathogenic
13	32326258	GT	G	BRCA2	NC_000013.11:g.32326261del	NM_000059.4:c.495del	H166Ifs*6	pathogenic
13	32339705	AAC	A	BRCA2	NC_000013.11:g.32339708_32339709del	NM_000059.4:c.5353_5354del	T1785*	pathogenic
13	32337885	ACAGC	A	BRCA2	NC_000013.11:g.32337886_32337889del	NM_000059.4:c.3531_3534del	D1177Efs*19	pathogenic
13	32349322	C	CA	BRCA2	NC_000013.11:g.32349332dup	NM_000059.4:c.7007+2436dup	?	benign
13	32379401	GA	G	BRCA2	NC_000013.11:g.32379404del	NM_000059.4:c.8842del	I2948Lfs*28	pathogenic
13	32379450	C	CA	BRCA2	NC_000013.11:g.32379452dup	NM_000059.4:c.8890dup	R2964Kfs*54	pathogenic
13	32380106	G	GATTT	BRCA2	NC_000013.11:g.32380107_32380108insTTTA	NM_000059.4:c.9218_9219insTTTA	I3075Pfs*37	pathogenic
13	32333014	TAAAG	T	BRCA2	NC_000013.11:g.32333016_32333019del	NM_000059.4:c.1538_1541del	K513Rfs*11	pathogenic
13	32338524	TGG	T	BRCA2	NC_000013.11:g.32338525_32338526del	NM_000059.4:c.4170_4171del	E1391Sfs*11	pathogenic
13	32333332	C	CA	BRCA2	NC_000013.11:g.32333332_32333333insA	NM_000059.4:c.1854_1855insA	Q619Tfs*3	pathogenic
13	32325119	GA	G	BRCA2	NC_000013.11:g.32325123del	NM_000059.4:c.364del	T122Lfs*14	pathogenic
13	32338273	TG	T	BRCA2	NC_000013.11:g.32338274del	NM_000059.4:c.3919del	E1307Kfs*28	pathogenic
13	32340032	T	TA	BRCA2	NC_000013.11:g.32340032_32340033insA	NM_000059.4:c.5677_5678insA	C1893*	pathogenic
13	32370464	TAG	AA	BRCA2	NC_000013.11:g.32370464_32370466delinsAA	NM_000059.4:c.8394_8396delinsAA	R2799Nfs*22	pathogenic
13	32336988	ACT	A	BRCA2	NC_000013.11:g.32336991_32336992del	NM_000059.4:c.2636_2637del	S879*	pathogenic
13	32379893	A	AC	BRCA2	NC_000013.11:g.32379894dup	NM_000059.4:c.9098dup	Q3034Sfs*10	pathogenic
13	32333278	T	A	BRCA2	NC_000013.11:g.32333278T>A	NM_000059.4:c.1800T>A	Y600*	pathogenic
13	32330987	G	A	BRCA2	NC_000013.11:g.32330987G>A	NM_000059.4:c.750G>A	V250=	likely_benign
13	32338485	ACACT	A	BRCA2	NC_000013.11:g.32338488_32338491del	NM_000059.4:c.4133_4136del	T1378Rfs*9	pathogenic
13	32355194	TAA	T	BRCA2	NC_000013.11:g.32355195_32355196del	NM_000059.4:c.7342_7343del	K2448Dfs*2	pathogenic
13	32340059	G	A	BRCA2	NC_000013.11:g.32340059G>A	NM_000059.4:c.5704G>A	D1902N	benign
13	32341155	C	A	BRCA2	NC_000013.11:g.32341155C>A	NM_000059.4:c.6800C>A	S2267*	pathogenic
13	32340996	CT	C	BRCA2	NC_000013.11:g.32340998del	NM_000059.4:c.6643del	Y2215Tfs*14	pathogenic
13	32342695	C	T	BRCA2	NC_000013.11:g.32342695C>T	NM_000059.4:c.6841+1499C>T	?	benign
13	32337423	AC	A	BRCA2	NC_000013.11:g.32337424del	NM_000059.4:c.3069del	N1023Kfs*20	pathogenic
13	32336380	A	G	BRCA2	NC_000013.11:g.32336380A>G	NM_000059.4:c.2025A>G	T675=	likely_benign
13	32332296	C	G	BRCA2	NC_000013.11:g.32332296C>G	NM_000059.4:c.818C>G	S273*	pathogenic
13	32346894	TC	T	BRCA2	NC_000013.11:g.32346895del	NM_000059.4:c.7006del	R2336Afs*31	pathogenic
13	32330965	ATGAT	A	BRCA2	NC_000013.11:g.32330966_32330969del	NM_000059.4:c.729_732del	N243Kfs*7	pathogenic
13	32333284	A	G	BRCA2	NC_000013.11:g.32333284A>G	NM_000059.4:c.1806A>G	G602=	likely_benign
13	32371073	AT	A	BRCA2	NC_000013.11:g.32371075del	NM_000059.4:c.8607del	Q2870Rfs*21	pathogenic
13	32332889	G	T	BRCA2	NC_000013.11:g.32332889G>T	NM_000059.4:c.1411G>T	E471*	pathogenic
13	32363475	TGGTG	T	BRCA2	NC_000013.11:g.32363478_32363481del	NM_000059.4:c.8276_8279del	V2759Afs*17	pathogenic
13	32354879	A	G	BRCA2	NC_000013.11:g.32354879A>G	NM_000059.4:c.7026A>G	Q2342=	likely_benign
13	32340321	CAG	C	BRCA2	NC_000013.11:g.32340323_32340324del	NM_000059.4:c.5968_5969del	D1990Cfs*12	pathogenic
13	32347999	C	T	BRCA2	NC_000013.11:g.32347999C>T	NM_000059.4:c.7007+1103C>T	?	benign
13	32339592	C	CT	BRCA2	NC_000013.11:g.32339593dup	NM_000059.4:c.5238dup	N1747*	pathogenic
13	32337215	G	T	BRCA2	NC_000013.11:g.32337215G>T	NM_000059.4:c.2860G>T	E954*	pathogenic
13	32337141	T	C	BRCA2	NC_000013.11:g.32337141T>C	NM_000059.4:c.2786T>C	L929S	benign
13	32339928	CAATT	C	BRCA2	NC_000013.11:g.32339931_32339934del	NM_000059.4:c.5576_5579del	I1859Kfs*3	pathogenic
13	32379473	A	T	BRCA2	NC_000013.11:g.32379473A>T	NM_000059.4:c.8911A>T	K2971*	pathogenic
13	32362527	CTG	C	BRCA2	NC_000013.11:g.32362532_32362533del	NM_000059.4:c.7815_7816del	C2605*	pathogenic
13	32332832	C	A	BRCA2	NC_000013.11:g.32332832C>A	NM_000059.4:c.1354C>A	L452I	benign
13	32333333	C	T	BRCA2	NC_000013.11:g.32333333C>T	NM_000059.4:c.1855C>T	Q619*	pathogenic
13	32363182	T	A	BRCA2	NC_000013.11:g.32363182T>A	NM_000059.4:c.7980T>A	Y2660*	pathogenic
13	32377582	C	T	BRCA2	NC_000013.11:g.32377582C>T	NM_000059.4:c.8754+791C>T	?	benign
13	32340977	A	AAT	BRCA2	NC_000013.11:g.32340981_32340982dup	NM_000059.4:c.6626_6627dup	E2210*	pathogenic
13	32319142	G	T	BRCA2	NC_000013.11:g.32319142G>T	NM_000059.4:c.133G>T	E45*	pathogenic
13	32338758	C	CT	BRCA2	NC_000013.11:g.32338759dup	NM_000059.4:c.4404dup	D1469*	pathogenic
13	32338827	TGAAA	T	BRCA2	NC_000013.11:g.32338833_32338836del	NM_000059.4:c.4478_4481del	E1493Vfs*10	pathogenic
13	32339513	TCAAA	T	BRCA2	NC_000013.11:g.32339516_32339519del	NM_000059.4:c.5161_5164del	N1721Vfs*3	pathogenic
13	32337717	C	G	BRCA2	NC_000013.11:g.32337717C>G	NM_000059.4:c.3362C>G	S1121*	pathogenic
13	32336319	C	G	BRCA2	NC_000013.11:g.32336319C>G	NM_000059.4:c.1964C>G	P655R	benign
13	32337733	AT	A	BRCA2	NC_000013.11:g.32337736del	NM_000059.4:c.3381del	F1127Lfs*23	pathogenic
13	32362661	C	T	BRCA2	NC_000013.11:g.32362661C>T	NM_000059.4:c.7944C>T	S2648=	likely_benign
13	32336924	C	T	BRCA2	NC_000013.11:g.32336924C>T	NM_000059.4:c.2569C>T	L857=	likely_benign
13	32338125	CA	C	BRCA2	NC_000013.11:g.32338127del	NM_000059.4:c.3772del	I1258*	pathogenic
13	32338939	C	T	BRCA2	NC_000013.11:g.32338939C>T	NM_000059.4:c.4584C>T	S1528=	likely_benign
13	32339964	TC	AG	BRCA2	NC_000013.11:g.32339964_32339965delinsAG	NM_000059.4:c.5609_5610delinsAG	F1870*	pathogenic
13	32340862	C	CA	BRCA2	NC_000013.11:g.32340865dup	NM_000059.4:c.6510dup	V2171Sfs*5	pathogenic
13	32399611	A	G	BRCA2	NC_000013.11:g.32399611A>G	NM_000059.4:c.*841A>G	?	benign
13	32339290	AG	A	BRCA2	NC_000013.11:g.32339291del	NM_000059.4:c.4936del	E1646Kfs*24	pathogenic
13	32386531	C	T	BRCA2	NC_000013.11:g.32386531C>T	NM_000059.4:c.9256+6386C>T	?	benign
13	32357773	T	TA	BRCA2	NC_000013.11:g.32357778dup	NM_000059.4:c.7654dup	I2552Nfs*2	pathogenic
13	32355188	T	TA	BRCA2	NC_000013.11:g.32355193dup	NM_000059.4:c.7340dup	N2447Kfs*2	pathogenic
13	32338516	AACTTT	A	BRCA2	NC_000013.11:g.32338517_32338521del	NM_000059.4:c.4162_4166del	T1388Ffs*13	pathogenic
13	32340133	T	C	BRCA2	NC_000013.11:g.32340133T>C	NM_000059.4:c.5778T>C	S1926=	likely_benign
13	32332526	G	GA	BRCA2	NC_000013.11:g.32332531dup	NM_000059.4:c.1053dup	Y352Ifs*6	pathogenic
13	32396919	G	T	BRCA2	NC_000013.11:g.32396919G>T	NM_000059.4:c.9523G>T	E3175*	pathogenic
13	32356571	G	GT	BRCA2	NC_000013.11:g.32356572dup	NM_000059.4:c.7580dup	G2528Rfs*11	pathogenic
13	32336945	C	T	BRCA2	NC_000013.11:g.32336945C>T	NM_000059.4:c.2590C>T	Q864*	pathogenic
13	32332719	T	A	BRCA2	NC_000013.11:g.32332719T>A	NM_000059.4:c.1241T>A	L414*	pathogenic
13	32380124	G	A	BRCA2	NC_000013.11:g.32380124G>A	NM_000059.4:c.9235G>A	V3079I	benign
13	32331861	A	G	BRCA2	NC_000013.11:g.32331861A>G	NM_000059.4:c.794-411A>G	?	benign
13	32379822	AT	A	BRCA2	NC_000013.11:g.32379823del	NM_000059.4:c.9027del	H3010Ifs*18	pathogenic
13	32330965	A	AT	BRCA2	NC_000013.11:g.32330966dup	NM_000059.4:c.729dup	D244*	pathogenic
13	32332592	A	C	BRCA2	NC_000013.11:g.32332592A>C	NM_000059.4:c.1114A>C	N372H	benign
13	32337430	GA	TT	BRCA2	NC_000013.11:g.32337430_32337431delinsTT	NM_000059.4:c.3075_3076delinsTT	K1025_K1026delinsN*	pathogenic
13	32357805	C	CT	BRCA2	NC_000013.11:g.32357805_32357806insT	NM_000059.4:c.7681_7682insT	Q2561Lfs*5	pathogenic
13	32332654	C	T	BRCA2	NC_000013.11:g.32332654C>T	NM_000059.4:c.1176C>T	A392=	likely_benign
13	32340790	T	C	BRCA2	NC_000013.11:g.32340790T>C	NM_000059.4:c.6435T>C	N2145=	likely_benign
13	32328244	C	T	BRCA2	NC_000013.11:g.32328244C>T	NM_000059.4:c.632-1199C>T	?	benign
13	32336864	GA	G	BRCA2	NC_000013.11:g.32336869del	NM_000059.4:c.2514del	K838Nfs*3	pathogenic
13	32330917	A	G	BRCA2	NC_000013.11:g.32330917A>G	NM_000059.4:c.682-2A>G	?	pathogenic
13	32338824	T	TA	BRCA2	NC_000013.11:g.32338825dup	NM_000059.4:c.4470dup	L1491Tfs*23	pathogenic
13	32340386	T	TTG	BRCA2	NC_000013.11:g.32340387_32340388insGT	NM_000059.4:c.6032_6033insGT	F2011Lfs*30	pathogenic
13	32385099	C	T	BRCA2	NC_000013.11:g.32385099C>T	NM_000059.4:c.9256+4954C>T	?	benign
13	32338236	T	G	BRCA2	NC_000013.11:g.32338236T>G	NM_000059.4:c.3881T>G	L1294*	pathogenic
13	32339707	C	CA	BRCA2	NC_000013.11:g.32339708dup	NM_000059.4:c.5353dup	T1785Nfs*2	pathogenic
13	32379324	TCAGTGAAGAG	T	BRCA2	NC_000013.11:g.32379329_32379338del	NM_000059.4:c.8767_8776del	E2923*	pathogenic
13	32338658	AAT	A	BRCA2	NC_000013.11:g.32338661_32338662del	NM_000059.4:c.4306_4307del	I1436*	pathogenic
13	32330959	AG	A	BRCA2	NC_000013.11:g.32330960del	NM_000059.4:c.723del	N243Mfs*8	pathogenic
13	32341029	CAG	C	BRCA2	NC_000013.11:g.32341031_32341032del	NM_000059.4:c.6676_6677del	E2226Sfs*6	pathogenic
13	32396907	ATACT	A	BRCA2	NC_000013.11:g.32396909_32396912del	NM_000059.4:c.9513_9516del	L3172Afs*44	pathogenic
13	32337878	C	T	BRCA2	NC_000013.11:g.32337878C>T	NM_000059.4:c.3523C>T	Q1175*	pathogenic
13	32316487	A	G	BRCA2	NC_000013.11:g.32316487A>G	NM_000059.4:c.27A>G	P9=	likely_benign
13	32333076	CTG	C	BRCA2	NC_000013.11:g.32333077_32333078del	NM_000059.4:c.1599_1600del	E534Sfs*3	pathogenic
13	32338624	T	C	BRCA2	NC_000013.11:g.32338624T>C	NM_000059.4:c.4269T>C	T1423=	likely_benign
13	32363288	T	C	BRCA2	NC_000013.11:g.32363288T>C	NM_000059.4:c.8086T>C	L2696=	likely_benign
13	32338830	AAG	A	BRCA2	NC_000013.11:g.32338832_32338833del	NM_000059.4:c.4477_4478del	E1493Kfs*20	pathogenic
13	32336491	G	T	BRCA2	NC_000013.11:g.32336491G>T	NM_000059.4:c.2136G>T	L712=	likely_benign
13	32340077	CTA	C	BRCA2	NC_000013.11:g.32340078_32340079del	NM_000059.4:c.5723_5724del	L1908Rfs*2	pathogenic
13	32330925	A	T	BRCA2	NC_000013.11:g.32330925A>T	NM_000059.4:c.688A>T	K230*	pathogenic
13	32358855	G	T	BRCA2	NC_000013.11:g.32358855G>T	NM_000059.4:c.7805+926G>T	?	benign
13	32336749	CA	C	BRCA2	NC_000013.11:g.32336752del	NM_000059.4:c.2397del	G800Vfs*10	pathogenic
13	32338174	TAAGA	T	BRCA2	NC_000013.11:g.32338175_32338178del	NM_000059.4:c.3820_3823del	K1274*	pathogenic
13	32386560	A	G	BRCA2	NC_000013.11:g.32386560A>G	NM_000059.4:c.9256+6415A>G	?	benign
13	32326545	T	TG	BRCA2	NC_000013.11:g.32326547dup	NM_000059.4:c.565dup	D189Gfs*3	pathogenic
13	32336792	A	AT	BRCA2	NC_000013.11:g.32336794dup	NM_000059.4:c.2439dup	P814Sfs*13	pathogenic
13	32319220	T	TA	BRCA2	NC_000013.11:g.32319221dup	NM_000059.4:c.212dup	Y71*	pathogenic
13	32355232	A	AG	BRCA2	NC_000013.11:g.32355232_32355233insG	NM_000059.4:c.7379_7380insG	N2460Kfs*15	pathogenic
13	32368879	C	T	BRCA2	NC_000013.11:g.32368879C>T	NM_000059.4:c.8332-1523C>T	?	benign
13	32326563	G	A	BRCA2	NC_000013.11:g.32326563G>A	NM_000059.4:c.581G>A	W194*	pathogenic
13	32336399	AT	A	BRCA2	NC_000013.11:g.32336400del	NM_000059.4:c.2045del	I682Tfs*48	pathogenic
13	32380141	AACA	TT	BRCA2	NC_000013.11:g.32380141_32380144delinsTT	NM_000059.4:c.9252_9255delinsTT	K3084Nfs*26	pathogenic
13	32340385	CTT	C	BRCA2	NC_000013.11:g.32340388_32340389del	NM_000059.4:c.6033_6034del	S2012Qfs*5	pathogenic
13	32339244	CA	C	BRCA2	NC_000013.11:g.32339249del	NM_000059.4:c.4894del	S1632Vfs*4	pathogenic
13	32340216	CT	C	BRCA2	NC_000013.11:g.32340218del	NM_000059.4:c.5863del	S1955Qfs*8	pathogenic
13	32355259	C	CT	BRCA2	NC_000013.11:g.32355262dup	NM_000059.4:c.7409dup	T2471Hfs*4	pathogenic
13	32338175	AAGAT	A	BRCA2	NC_000013.11:g.32338179_32338182del	NM_000059.4:c.3824_3827del	I1275Kfs*8	pathogenic
13	32339786	GAGGA	G	BRCA2	NC_000013.11:g.32339788_32339791del	NM_000059.4:c.5433_5436del	E1811Dfs*3	pathogenic
13	32339341	A	C	BRCA2	NC_000013.11:g.32339341A>C	NM_000059.4:c.4986A>C	S1662=	likely_benign
13	32370530	A	G	BRCA2	NC_000013.11:g.32370530A>G	NM_000059.4:c.8460A>G	V2820=	likely_benign
13	32336502	AGT	A	BRCA2	NC_000013.11:g.32336506_32336507del	NM_000059.4:c.2151_2152del	C717*	pathogenic
13	32333070	AAG	A	BRCA2	NC_000013.11:g.32333072_32333073del	NM_000059.4:c.1594_1595del	E532Nfs*2	pathogenic
13	32365247	AC	A	BRCA2	NC_000013.11:g.32365248del	NM_000059.4:c.8331+1715del	?	benign
13	32330317	C	T	BRCA2	NC_000013.11:g.32330317C>T	NM_000059.4:c.682-602C>T	?	benign
13	32340195	CT	C	BRCA2	NC_000013.11:g.32340197del	NM_000059.4:c.5842del	C1948Vfs*15	pathogenic
13	32319165	TA	T	BRCA2	NC_000013.11:g.32319170del	NM_000059.4:c.161del	N54Tfs*26	pathogenic
13	32337430	GA	G	BRCA2	NC_000013.11:g.32337432del	NM_000059.4:c.3077del	K1026Rfs*17	pathogenic
13	32379508	A	AG	BRCA2	NC_000013.11:g.32379509dup	NM_000059.4:c.8947dup	D2983Gfs*35	pathogenic
13	32338171	G	GT	BRCA2	NC_000013.11:g.32338174dup	NM_000059.4:c.3819dup	K1274*	pathogenic
13	32362595	G	C	BRCA2	NC_000013.11:g.32362595G>C	NM_000059.4:c.7878G>C	W2626C	pathogenic
13	32332536	C	A	BRCA2	NC_000013.11:g.32332536C>A	NM_000059.4:c.1058C>A	S353*	pathogenic
13	32344804	A	G	BRCA2	NC_000013.11:g.32344804A>G	NM_000059.4:c.6937+151A>G	?	benign
13	32357884	TC	T	BRCA2	NC_000013.11:g.32357885del	NM_000059.4:c.7761del	I2588Yfs*60	pathogenic
13	32336851	G	A	BRCA2	NC_000013.11:g.32336851G>A	NM_000059.4:c.2496G>A	E832=	likely_benign
13	32339568	CTTAT	C	BRCA2	NC_000013.11:g.32339572_32339575del	NM_000059.4:c.5217_5220del	Y1739*	pathogenic
13	32337241	T	C	BRCA2	NC_000013.11:g.32337241T>C	NM_000059.4:c.2886T>C	H962=	likely_benign
13	32337808	C	CT	BRCA2	NC_000013.11:g.32337810dup	NM_000059.4:c.3455dup	L1152Ffs*6	pathogenic
13	32385702	A	C	BRCA2	NC_000013.11:g.32385702A>C	NM_000059.4:c.9256+5557A>C	?	benign
13	32338490	C	CA	BRCA2	NC_000013.11:g.32338491dup	NM_000059.4:c.4136dup	I1380Dfs*2	pathogenic
13	32363476	G	C	BRCA2	NC_000013.11:g.32363476G>C	NM_000059.4:c.8274G>C	L2758=	likely_benign
13	32318623	A	C	BRCA2	NC_000013.11:g.32318623A>C	NM_000059.4:c.68-454A>C	?	benign
13	32340094	T	A	BRCA2	NC_000013.11:g.32340094T>A	NM_000059.4:c.5739T>A	C1913*	pathogenic
13	32340165	CTG	C	BRCA2	NC_000013.11:g.32340166_32340167del	NM_000059.4:c.5811_5812del	G1938Ifs*6	pathogenic
13	32338603	A	G	BRCA2	NC_000013.11:g.32338603A>G	NM_000059.4:c.4248A>G	Q1416=	likely_benign
13	32354909	T	A	BRCA2	NC_000013.11:g.32354909T>A	NM_000059.4:c.7056T>A	P2352=	likely_benign
13	32370417	A	AC	BRCA2	NC_000013.11:g.32370418dup	NM_000059.4:c.8348dup	R2784Sfs*14	pathogenic
13	32339298	CAA	C	BRCA2	NC_000013.11:g.32339302_32339303del	NM_000059.4:c.4947_4948del	P1651Cfs*14	pathogenic
13	32354859	A	G	BRCA2	NC_000013.11:g.32354859A>G	NM_000059.4:c.7008-2A>G	?	pathogenic
13	32339957	GAC	G	BRCA2	NC_000013.11:g.32339959_32339960del	NM_000059.4:c.5604_5605del	D1868Efs*4	pathogenic
13	32339842	G	A	BRCA2	NC_000013.11:g.32339842G>A	NM_000059.4:c.5487G>A	L1829=	likely_benign
13	32337431	A	T	BRCA2	NC_000013.11:g.32337431A>T	NM_000059.4:c.3076A>T	K1026*	pathogenic
13	32340262	C	G	BRCA2	NC_000013.11:g.32340262C>G	NM_000059.4:c.5907C>G	V1969=	likely_benign
13	32336191	T	C	BRCA2	NC_000013.11:g.32336191T>C	NM_000059.4:c.1910-74T>C	?	benign
13	32366755	G	GAGGT	BRCA2	NC_000013.11:g.32366756_32366759dup	NM_000059.4:c.8331+3223_8331+3226dup	?	benign
13	32370540	A	T	BRCA2	NC_000013.11:g.32370540A>T	NM_000059.4:c.8470A>T	R2824*	pathogenic
13	32346871	G	T	BRCA2	NC_000013.11:g.32346871G>T	NM_000059.4:c.6982G>T	E2328*	pathogenic
13	32371400	A	T	BRCA2	NC_000013.11:g.32371400A>T	NM_000059.4:c.8632+300A>T	?	benign
13	32338117	G	A	BRCA2	NC_000013.11:g.32338117G>A	NM_000059.4:c.3762G>A	E1254=	likely_benign
13	32389392	C	G	BRCA2	NC_000013.11:g.32389392C>G	NM_000059.4:c.9257-5297C>G	?	benign
13	32398422	T	C	BRCA2	NC_000013.11:g.32398422T>C	NM_000059.4:c.9909T>C	S3303=	likely_benign
13	32338600	G	A	BRCA2	NC_000013.11:g.32338600G>A	NM_000059.4:c.4245G>A	E1415=	likely_benign
13	32319233	C	CA	BRCA2	NC_000013.11:g.32319233_32319234insA	NM_000059.4:c.224_225insA	S76Ffs*25	pathogenic
13	32338378	A	C	BRCA2	NC_000013.11:g.32338378A>C	NM_000059.4:c.4023A>C	S1341=	likely_benign
13	32341103	A	G	BRCA2	NC_000013.11:g.32341103A>G	NM_000059.4:c.6748A>G	T2250A	benign
13	32340973	A	G	BRCA2	NC_000013.11:g.32340973A>G	NM_000059.4:c.6618A>G	K2206=	likely_benign
13	32340149	CAT	C	BRCA2	NC_000013.11:g.32340151_32340152del	NM_000059.4:c.5796_5797del	H1932Qfs*12	pathogenic
13	32339064	GA	G	BRCA2	NC_000013.11:g.32339065del	NM_000059.4:c.4710del	E1571Rfs*8	pathogenic
13	32337898	ATT	A	BRCA2	NC_000013.11:g.32337900_32337901del	NM_000059.4:c.3545_3546del	F1182*	pathogenic
13	32336692	G	T	BRCA2	NC_000013.11:g.32336692G>T	NM_000059.4:c.2337G>T	L779=	likely_benign
13	32379808	G	A	BRCA2	NC_000013.11:g.32379808G>A	NM_000059.4:c.9012G>A	K3004=	likely_benign
13	32346837	A	ATT	BRCA2	NC_000013.11:g.32346837_32346838insTT	NM_000059.4:c.6948_6949insTT	D2317Lfs*12	pathogenic
13	32339570	TATTTA	T	BRCA2	NC_000013.11:g.32339572_32339576del	NM_000059.4:c.5217_5221del	Y1739*	pathogenic
13	32362535	CA	C	BRCA2	NC_000013.11:g.32362536del	NM_000059.4:c.7819del	T2607Lfs*41	pathogenic
13	32356539	CCA	C	BRCA2	NC_000013.11:g.32356541_32356542del	NM_000059.4:c.7549_7550del	T2517Sfs*21	pathogenic
13	32370534	A	AT	BRCA2	NC_000013.11:g.32370536dup	NM_000059.4:c.8466dup	Q2823Sfs*22	pathogenic
13	32394705	CTA	C	BRCA2	NC_000013.11:g.32394707_32394708del	NM_000059.4:c.9275_9276del	Y3092Ffs*18	pathogenic
13	32398209	TTGTA	T	BRCA2	NC_000013.11:g.32398212_32398215del	NM_000059.4:c.9699_9702del	C3233Wfs*15	likely_pathogenic
13	32329687	T	G	BRCA2	NC_000013.11:g.32329687T>G	NM_000059.4:c.681+195T>G	?	benign
13	32370458	TGACCCTA	T	BRCA2	NC_000013.11:g.32370463_32370469del	NM_000059.4:c.8393_8399del	P2798Lfs*21	pathogenic
13	32357794	C	CAG	BRCA2	NC_000013.11:g.32357797_32357798dup	NM_000059.4:c.7673_7674dup	F2560Lfs*89	pathogenic
13	32398593	A	G	BRCA2	NC_000013.11:g.32398593A>G	NM_000059.4:c.10080A>G	K3360=	likely_benign
13	32340406	AAG	A	BRCA2	NC_000013.11:g.32340407_32340408del	NM_000059.4:c.6052_6053del	S2018*	pathogenic
13	32340775	T	G	BRCA2	NC_000013.11:g.32340775T>G	NM_000059.4:c.6420T>G	G2140=	likely_benign
13	32337587	GT	G	BRCA2	NC_000013.11:g.32337590del	NM_000059.4:c.3235del	S1079Lfs*8	pathogenic
13	32332974	AG	A	BRCA2	NC_000013.11:g.32332977del	NM_000059.4:c.1499del	G500Vfs*9	pathogenic
13	32341035	C	CA	BRCA2	NC_000013.11:g.32341036dup	NM_000059.4:c.6681dup	V2228Sfs*5	pathogenic
13	32338128	TAA	T	BRCA2	NC_000013.11:g.32338129_32338130del	NM_000059.4:c.3774_3775del	I1258Mfs*6	pathogenic
13	32338529	GT	G	BRCA2	NC_000013.11:g.32338531del	NM_000059.4:c.4176del	A1393Rfs*17	pathogenic
13	32347801	A	G	BRCA2	NC_000013.11:g.32347801A>G	NM_000059.4:c.7007+905A>G	?	benign
13	32337953	TG	T	BRCA2	NC_000013.11:g.32337954del	NM_000059.4:c.3599del	C1200Lfs*9	pathogenic
13	32338294	C	G	BRCA2	NC_000013.11:g.32338294C>G	NM_000059.4:c.3939C>G	Y1313*	pathogenic
13	32326257	T	A	BRCA2	NC_000013.11:g.32326257T>A	NM_000059.4:c.491T>A	L164*	pathogenic
13	32319232	G	GA	BRCA2	NC_000013.11:g.32319232_32319233insA	NM_000059.4:c.223_224insA	A75Dfs*26	pathogenic
13	32336746	G	A	BRCA2	NC_000013.11:g.32336746G>A	NM_000059.4:c.2391G>A	K797=	likely_benign
13	32339514	C	G	BRCA2	NC_000013.11:g.32339514C>G	NM_000059.4:c.5159C>G	S1720*	pathogenic
13	32339995	T	G	BRCA2	NC_000013.11:g.32339995T>G	NM_000059.4:c.5640T>G	N1880K	benign
13	32364618	C	CT	BRCA2	NC_000013.11:g.32364619dup	NM_000059.4:c.8331+1086dup	?	benign
13	32332473	T	TG	BRCA2	NC_000013.11:g.32332473_32332474insG	NM_000059.4:c.995_996insG	I332Mfs*4	pathogenic
13	32326124	A	ATG	BRCA2	NC_000013.11:g.32326126_32326127dup	NM_000059.4:c.451_452dup	T152*	pathogenic
13	32326253	AGT	A	BRCA2	NC_000013.11:g.32326254_32326255del	NM_000059.4:c.488_489del	S163Ifs*19	pathogenic
13	32338200	CTG	C	BRCA2	NC_000013.11:g.32338202_32338203del	NM_000059.4:c.3847_3848del	V1283Kfs*2	pathogenic
13	32326144	A	AT	BRCA2	NC_000013.11:g.32326144_32326145insT	NM_000059.4:c.469_470insT	K157Ifs*26	pathogenic
13	32339933	A	T	BRCA2	NC_000013.11:g.32339933A>T	NM_000059.4:c.5578A>T	K1860*	pathogenic
13	32325106	GTC	G	BRCA2	NC_000013.11:g.32325108_32325109del	NM_000059.4:c.349_350del	L117Sfs*6	pathogenic
13	32370449	A	G	BRCA2	NC_000013.11:g.32370449A>G	NM_000059.4:c.8379A>G	G2793=	likely_benign
13	32339556	AAAAA	GAAAAG	BRCA2	NC_000013.11:g.32339556_32339560delinsGAAAAG	NM_000059.4:c.5201_5205delinsGAAAAG	E1734Gfs*9	pathogenic
13	32338584	C	CA	BRCA2	NC_000013.11:g.32338584_32338585insA	NM_000059.4:c.4229_4230insA	A1411Cfs*3	pathogenic
13	32332308	A	AT	BRCA2	NC_000013.11:g.32332309dup	NM_000059.4:c.831dup	S278*	pathogenic
13	32339288	A	T	BRCA2	NC_000013.11:g.32339288A>T	NM_000059.4:c.4933A>T	K1645*	pathogenic
13	32340685	T	TA	BRCA2	NC_000013.11:g.32340687dup	NM_000059.4:c.6332dup	R2112Efs*17	pathogenic
13	32379448	AT	A	BRCA2	NC_000013.11:g.32379449del	NM_000059.4:c.8887del	S2963Qfs*13	pathogenic
13	32362569	A	AT	BRCA2	NC_000013.11:g.32362572dup	NM_000059.4:c.7855dup	W2619Lfs*4	pathogenic
13	32341017	A	AAAAG	BRCA2	NC_000013.11:g.32341017_32341018insAAAG	NM_000059.4:c.6662_6663insAAAG	N2221Kfs*5	pathogenic
13	32326106	TTGTTC	T	BRCA2	NC_000013.11:g.32326108_32326112del	NM_000059.4:c.433_437del	V145Tfs*11	pathogenic
13	32339202	T	G	BRCA2	NC_000013.11:g.32339202T>G	NM_000059.4:c.4847T>G	L1616*	pathogenic
13	32336380	AT	A	BRCA2	NC_000013.11:g.32336381del	NM_000059.4:c.2026del	C676Vfs*6	pathogenic
13	32332658	G	T	BRCA2	NC_000013.11:g.32332658G>T	NM_000059.4:c.1180G>T	E394*	pathogenic
13	32337001	T	A	BRCA2	NC_000013.11:g.32337001T>A	NM_000059.4:c.2646T>A	L882=	likely_benign
13	32338509	C	A	BRCA2	NC_000013.11:g.32338509C>A	NM_000059.4:c.4154C>A	S1385*	pathogenic
13	32371062	T	A	BRCA2	NC_000013.11:g.32371062T>A	NM_000059.4:c.8594T>A	L2865*	pathogenic
13	32341031	G	T	BRCA2	NC_000013.11:g.32341031G>T	NM_000059.4:c.6676G>T	E2226*	pathogenic
13	32325762	G	A	BRCA2	NC_000013.11:g.32325762G>A	NM_000059.4:c.426-339G>A	?	benign
13	32338450	T	A	BRCA2	NC_000013.11:g.32338450T>A	NM_000059.4:c.4095T>A	C1365*	pathogenic
13	32363370	A	G	BRCA2	NC_000013.11:g.32363370A>G	NM_000059.4:c.8168A>G	D2723G	pathogenic
13	32340951	CTT	C	BRCA2	NC_000013.11:g.32340955_32340956del	NM_000059.4:c.6600_6601del	S2201*	pathogenic
13	32337970	T	C	BRCA2	NC_000013.11:g.32337970T>C	NM_000059.4:c.3615T>C	S1205=	likely_benign
13	32339244	C	G	BRCA2	NC_000013.11:g.32339244C>G	NM_000059.4:c.4889C>G	S1630*	pathogenic
13	32340922	C	T	BRCA2	NC_000013.11:g.32340922C>T	NM_000059.4:c.6567C>T	N2189=	likely_benign
13	32336880	T	TA	BRCA2	NC_000013.11:g.32336881dup	NM_000059.4:c.2526dup	A843Sfs*38	pathogenic
13	32340631	T	TC	BRCA2	NC_000013.11:g.32340632dup	NM_000059.4:c.6277dup	H2093Pfs*7	pathogenic
13	32332374	T	TC	BRCA2	NC_000013.11:g.32332374_32332375insC	NM_000059.4:c.896_897insC	V300Cfs*5	pathogenic
13	32337880	G	A	BRCA2	NC_000013.11:g.32337880G>A	NM_000059.4:c.3525G>A	Q1175=	likely_benign
13	32340883	C	T	BRCA2	NC_000013.11:g.32340883C>T	NM_000059.4:c.6528C>T	N2176=	likely_benign
13	32332665	C	CTTTA	BRCA2	NC_000013.11:g.32332666_32332667insTTAT	NM_000059.4:c.1188_1189insTTAT	Q397Lfs*25	pathogenic
13	32319252	C	CA	BRCA2	NC_000013.11:g.32319255dup	NM_000059.4:c.246dup	E83Rfs*18	pathogenic
13	32340140	AT	A	BRCA2	NC_000013.11:g.32340144del	NM_000059.4:c.5789del	L1930Yfs*33	pathogenic
13	32369205	TAA	T	BRCA2	NC_000013.11:g.32369207_32369208del	NM_000059.4:c.8332-1195_8332-1194del	?	benign
13	32340307	A	G	BRCA2	NC_000013.11:g.32340307A>G	NM_000059.4:c.5952A>G	K1984=	likely_benign
13	32371000	AAGAG	A	BRCA2	NC_000013.11:g.32371003_32371006del	NM_000059.4:c.8535_8538del	E2846Kfs*16	pathogenic
13	32356472	C	T	BRCA2	NC_000013.11:g.32356472C>T	NM_000059.4:c.7480C>T	R2494*	pathogenic
13	32333165	TG	T	BRCA2	NC_000013.11:g.32333167del	NM_000059.4:c.1689del	W563Cfs*10	pathogenic
13	32381652	G	T	BRCA2	NC_000013.11:g.32381652G>T	NM_000059.4:c.9256+1507G>T	?	benign
13	32370988	A	C	BRCA2	NC_000013.11:g.32370988A>C	NM_000059.4:c.8520A>C	I2840=	likely_benign
13	32319254	AAG	A	BRCA2	NC_000013.11:g.32319257_32319258del	NM_000059.4:c.248_249del	E83Afs*17	pathogenic
13	32341126	C	T	BRCA2	NC_000013.11:g.32341126C>T	NM_000059.4:c.6771C>T	P2257=	likely_benign
13	32398542	A	G	BRCA2	NC_000013.11:g.32398542A>G	NM_000059.4:c.10029A>G	E3343=	likely_benign
13	32319302	T	G	BRCA2	NC_000013.11:g.32319302T>G	NM_000059.4:c.293T>G	L98*	pathogenic
13	32333173	CA	C	BRCA2	NC_000013.11:g.32333174del	NM_000059.4:c.1696del	T566Pfs*7	pathogenic
13	32337803	A	AAG	BRCA2	NC_000013.11:g.32337803_32337804insAG	NM_000059.4:c.3448_3449insAG	T1150Kfs*4	pathogenic
13	32338069	G	A	BRCA2	NC_000013.11:g.32338069G>A	NM_000059.4:c.3714G>A	V1238=	likely_benign
13	32379810	GAT	G	BRCA2	NC_000013.11:g.32379812_32379813del	NM_000059.4:c.9016_9017del	Y3006Qfs*11	pathogenic
13	32339254	C	CT	BRCA2	NC_000013.11:g.32339259dup	NM_000059.4:c.4904dup	L1635Ffs*4	pathogenic
13	32380071	T	TA	BRCA2	NC_000013.11:g.32380072dup	NM_000059.4:c.9183dup	D3062Rfs*10	pathogenic
13	32379885	CAAAA	C	BRCA2	NC_000013.11:g.32379890_32379893del	NM_000059.4:c.9094_9097del	K3032Lfs*29	pathogenic
13	32338093	TA	T	BRCA2	NC_000013.11:g.32338094del	NM_000059.4:c.3739del	I1247Lfs*12	pathogenic
13	32337405	TC	T	BRCA2	NC_000013.11:g.32337406del	NM_000059.4:c.3051del	K1018Sfs*25	pathogenic
13	32333085	C	CT	BRCA2	NC_000013.11:g.32333086dup	NM_000059.4:c.1608dup	E537*	pathogenic
13	32356588	C	G	BRCA2	NC_000013.11:g.32356588C>G	NM_000059.4:c.7596C>G	P2532=	likely_benign
13	32336845	C	CT	BRCA2	NC_000013.11:g.32336845_32336846insT	NM_000059.4:c.2490_2491insT	V831Cfs*2	pathogenic
13	32337464	C	T	BRCA2	NC_000013.11:g.32337464C>T	NM_000059.4:c.3109C>T	Q1037*	pathogenic
13	32333131	CT	C	BRCA2	NC_000013.11:g.32333132del	NM_000059.4:c.1654del	S552Pfs*6	pathogenic
13	32340307	ATC	A	BRCA2	NC_000013.11:g.32340309_32340310del	NM_000059.4:c.5954_5955del	S1985Cfs*17	pathogenic
13	32336437	T	C	BRCA2	NC_000013.11:g.32336437T>C	NM_000059.4:c.2082T>C	N694=	likely_benign
13	32333006	G	T	BRCA2	NC_000013.11:g.32333006G>T	NM_000059.4:c.1528G>T	E510*	pathogenic
13	32370433	G	A	BRCA2	NC_000013.11:g.32370433G>A	NM_000059.4:c.8363G>A	W2788*	pathogenic
13	32326111	C	T	BRCA2	NC_000013.11:g.32326111C>T	NM_000059.4:c.436C>T	L146=	likely_benign
13	32389796	T	C	BRCA2	NC_000013.11:g.32389796T>C	NM_000059.4:c.9257-4893T>C	?	benign
13	32338840	C	T	BRCA2	NC_000013.11:g.32338840C>T	NM_000059.4:c.4485C>T	V1495=	likely_benign
13	32328672	A	T	BRCA2	NC_000013.11:g.32328672A>T	NM_000059.4:c.632-771A>T	?	benign
13	32340031	T	G	BRCA2	NC_000013.11:g.32340031T>G	NM_000059.4:c.5676T>G	G1892=	benign
13	32362520	C	CAG	BRCA2	NC_000013.11:g.32362521_32362522dup	NM_000059.4:c.7806-2_7806-1dup	?	pathogenic
13	32338808	ATAGT	A	BRCA2	NC_000013.11:g.32338811_32338814del	NM_000059.4:c.4456_4459del	V1486Nfs*5	pathogenic
13	32338988	C	CT	BRCA2	NC_000013.11:g.32338993dup	NM_000059.4:c.4638dup	D1547*	pathogenic
13	32339569	TTATTTAAG	T	BRCA2	NC_000013.11:g.32339572_32339579del	NM_000059.4:c.5217_5224del	Y1739*	pathogenic
13	32340105	C	A	BRCA2	NC_000013.11:g.32340105C>A	NM_000059.4:c.5750C>A	S1917*	pathogenic
13	32330966	T	TC	BRCA2	NC_000013.11:g.32330966_32330967insC	NM_000059.4:c.729_730insC	D244Rfs*2	pathogenic
13	32344634	T	C	BRCA2	NC_000013.11:g.32344634T>C	NM_000059.4:c.6918T>C	A2306=	likely_benign
13	32337853	CAT	C	BRCA2	NC_000013.11:g.32337855_32337856del	NM_000059.4:c.3500_3501del	I1167Nfs*16	pathogenic
13	32336501	C	CA	BRCA2	NC_000013.11:g.32336502dup	NM_000059.4:c.2147dup	C717Vfs*2	pathogenic
13	32376681	AAACC	A	BRCA2	NC_000013.11:g.32376683_32376686del	NM_000059.4:c.8646_8649del	K2882Nfs*8	pathogenic
13	32340124	C	T	BRCA2	NC_000013.11:g.32340124C>T	NM_000059.4:c.5769C>T	D1923=	likely_benign
13	32398263	A	C	BRCA2	NC_000013.11:g.32398263A>C	NM_000059.4:c.9750A>C	S3250=	likely_benign
13	32356610	G	A	BRCA2	NC_000013.11:g.32356610G>A	NM_000059.4:c.7617+1G>A	?	pathogenic
13	32339744	GC	G	BRCA2	NC_000013.11:g.32339745del	NM_000059.4:c.5390del	A1797Efs*8	pathogenic
13	32363509	AG	A	BRCA2	NC_000013.11:g.32363510del	NM_000059.4:c.8308del	A2770Pfs*7	pathogenic
13	32332442	AAAGT	A	BRCA2	NC_000013.11:g.32332446_32332449del	NM_000059.4:c.968_971del	V323Efs*25	pathogenic
13	32379391	GA	G	BRCA2	NC_000013.11:g.32379392del	NM_000059.4:c.8830del	I2944Sfs*32	pathogenic
13	32380134	T	TG	BRCA2	NC_000013.11:g.32380135dup	NM_000059.4:c.9246dup	K3083Efs*28	pathogenic
13	32340414	AACAT	A	BRCA2	NC_000013.11:g.32340415_32340418del	NM_000059.4:c.6060_6063del	E2020Dfs*19	pathogenic
13	32357842	T	G	BRCA2	NC_000013.11:g.32357842T>G	NM_000059.4:c.7718T>G	L2573*	pathogenic
13	32336566	A	G	BRCA2	NC_000013.11:g.32336566A>G	NM_000059.4:c.2211A>G	A737=	likely_benign
13	32379814	C	CATCT	BRCA2	NC_000013.11:g.32379815_32379816insTCTA	NM_000059.4:c.9019_9020insTCTA	R3007Ifs*2	pathogenic
13	32394810	G	A	BRCA2	NC_000013.11:g.32394810G>A	NM_000059.4:c.9378G>A	Q3126=	likely_benign
13	32396995	C	G	BRCA2	NC_000013.11:g.32396995C>G	NM_000059.4:c.9599C>G	S3200*	pathogenic
13	32336607	CTG	C	BRCA2	NC_000013.11:g.32336608_32336609del	NM_000059.4:c.2253_2254del	D752Lfs*10	pathogenic
13	32370422	G	A	BRCA2	NC_000013.11:g.32370422G>A	NM_000059.4:c.8352G>A	R2784=	likely_benign
13	32370505	G	GA	BRCA2	NC_000013.11:g.32370506dup	NM_000059.4:c.8436dup	G2813Rfs*7	pathogenic
13	32398248	A	G	BRCA2	NC_000013.11:g.32398248A>G	NM_000059.4:c.9735A>G	S3245=	likely_benign
13	32333094	GA	G	BRCA2	NC_000013.11:g.32333095del	NM_000059.4:c.1617del	L540Wfs*18	pathogenic
13	32337660	A	ATT	BRCA2	NC_000013.11:g.32337662_32337663dup	NM_000059.4:c.3307_3308dup	L1103Ffs*2	pathogenic
13	32333064	TTAAA	T	BRCA2	NC_000013.11:g.32333065_32333068del	NM_000059.4:c.1587_1590del	F529Lfs*28	pathogenic
13	32371060	C	T	BRCA2	NC_000013.11:g.32371060C>T	NM_000059.4:c.8592C>T	A2864=	likely_benign
13	32396999	G	A	BRCA2	NC_000013.11:g.32396999G>A	NM_000059.4:c.9603G>A	G3201=	likely_benign
13	32363286	C	G	BRCA2	NC_000013.11:g.32363286C>G	NM_000059.4:c.8084C>G	S2695*	pathogenic
13	32339158	T	TA	BRCA2	NC_000013.11:g.32339163dup	NM_000059.4:c.4808dup	N1603Kfs*6	pathogenic
13	32319111	ACTTT	A	BRCA2	NC_000013.11:g.32319115_32319118del	NM_000059.4:c.106_109del	S36Qfs*43	pathogenic
13	32327293	A	C	BRCA2	NC_000013.11:g.32327293A>C	NM_000059.4:c.631+680A>C	?	benign
13	32337642	A	AT	BRCA2	NC_000013.11:g.32337646dup	NM_000059.4:c.3291dup	N1098*	pathogenic
13	32336480	C	T	BRCA2	NC_000013.11:g.32336480C>T	NM_000059.4:c.2125C>T	L709=	likely_benign
13	32355072	G	GTTCC	BRCA2	NC_000013.11:g.32355073_32355076dup	NM_000059.4:c.7220_7223dup	P2409Sfs*4	pathogenic
13	32338986	AC	A	BRCA2	NC_000013.11:g.32338988del	NM_000059.4:c.4633del	L1545Ffs*23	pathogenic
13	32362545	G	GT	BRCA2	NC_000013.11:g.32362546dup	NM_000059.4:c.7829dup	D2611Gfs*7	pathogenic
13	32332812	CTTTG	C	BRCA2	NC_000013.11:g.32332813_32332816del	NM_000059.4:c.1335_1338del	L446Hfs*13	pathogenic
13	32340400	GT	G	BRCA2	NC_000013.11:g.32340403del	NM_000059.4:c.6048del	F2016Lfs*24	pathogenic
13	32379913	G	A	BRCA2	NC_000013.11:g.32379913G>A	NM_000059.4:c.9117G>A	P3039=	pathogenic
13	32397940	TCTTC	T	BRCA2	NC_000013.11:g.32397948_32397951del	NM_000059.4:c.9649-214_9649-211del	?	benign
13	32338496	AAAG	A	BRCA2	NC_000013.11:g.32338501_32338503del	NM_000059.4:c.4146_4148del	E1382del	benign
13	32333288	A	G	BRCA2	NC_000013.11:g.32333288A>G	NM_000059.4:c.1810A>G	K604E	benign
13	32333343	C	T	BRCA2	NC_000013.11:g.32333343C>T	NM_000059.4:c.1865C>T	A622V	benign
13	32332960	G	A	BRCA2	NC_000013.11:g.32332960G>A	NM_000059.4:c.1482G>A	V494=	likely_benign
13	32338441	C	T	BRCA2	NC_000013.11:g.32338441C>T	NM_000059.4:c.4086C>T	H1362=	likely_benign
13	32335140	TCAAG	T	BRCA2	NC_000013.11:g.32335141_32335144del	NM_000059.4:c.1910-1124_1910-1121del	?	benign
13	32317661	T	C	BRCA2	NC_000013.11:g.32317661T>C	NM_000059.4:c.67+1134T>C	?	benign
13	32339201	TTAAG	T	BRCA2	NC_000013.11:g.32339203_32339206del	NM_000059.4:c.4848_4851del	S1617Ifs*18	pathogenic
13	32356433	AT	A	BRCA2	NC_000013.11:g.32356435del	NM_000059.4:c.7443del	T2482Qfs*42	pathogenic
13	32336849	G	T	BRCA2	NC_000013.11:g.32336849G>T	NM_000059.4:c.2494G>T	E832*	pathogenic
13	32369919	G	T	BRCA2	NC_000013.11:g.32369919G>T	NM_000059.4:c.8332-483G>T	?	benign
13	32391658	A	T	BRCA2	NC_000013.11:g.32391658A>T	NM_000059.4:c.9257-3031A>T	?	benign
13	32339200	C	T	BRCA2	NC_000013.11:g.32339200C>T	NM_000059.4:c.4845C>T	L1615=	likely_benign
13	32358127	A	G	BRCA2	NC_000013.11:g.32358127A>G	NM_000059.4:c.7805+198A>G	?	benign
13	32325100	A	AT	BRCA2	NC_000013.11:g.32325101dup	NM_000059.4:c.342dup	K115*	pathogenic
13	32329467	CTG	C	BRCA2	NC_000013.11:g.32329469_32329470del	NM_000059.4:c.658_659del	V220Ifs*4	pathogenic
13	32319236	C	G	BRCA2	NC_000013.11:g.32319236C>G	NM_000059.4:c.227C>G	S76*	pathogenic
13	32333121	AGAAG	A	BRCA2	NC_000013.11:g.32333124_32333127del	NM_000059.4:c.1646_1649del	K549Rfs*8	pathogenic
13	32394813	G	A	BRCA2	NC_000013.11:g.32394813G>A	NM_000059.4:c.9381G>A	W3127*	pathogenic
13	32376744	G	T	BRCA2	NC_000013.11:g.32376744G>T	NM_000059.4:c.8707G>T	E2903*	pathogenic
13	32340188	A	ATATCACCT	BRCA2	NC_000013.11:g.32340190_32340197dup	NM_000059.4:c.5835_5842dup	C1948Yfs*18	pathogenic
13	32338034	CTG	C	BRCA2	NC_000013.11:g.32338035_32338036del	NM_000059.4:c.3680_3681del	L1227Qfs*5	pathogenic
13	32336924	C	CT	BRCA2	NC_000013.11:g.32336925dup	NM_000059.4:c.2570dup	R858Kfs*23	pathogenic
13	32339634	C	G	BRCA2	NC_000013.11:g.32339634C>G	NM_000059.4:c.5279C>G	S1760*	pathogenic
13	32339291	G	T	BRCA2	NC_000013.11:g.32339291G>T	NM_000059.4:c.4936G>T	E1646*	pathogenic
13	32336785	C	CA	BRCA2	NC_000013.11:g.32336790dup	NM_000059.4:c.2435dup	N812Kfs*15	pathogenic
13	32340054	C	A	BRCA2	NC_000013.11:g.32340054C>A	NM_000059.4:c.5699C>A	S1900*	pathogenic
13	32321936	T	C	BRCA2	NC_000013.11:g.32321936T>C	NM_000059.4:c.316+2611T>C	?	benign
13	32340300	GTGGAA	G	BRCA2	NC_000013.11:g.32340301_32340305del	NM_000059.4:c.5946_5950del	S1982Rfs*19	pathogenic
13	32350294	G	GT	BRCA2	NC_000013.11:g.32350301dup	NM_000059.4:c.7007+3405dup	?	benign
13	32337565	A	G	BRCA2	NC_000013.11:g.32337565A>G	NM_000059.4:c.3210A>G	A1070=	likely_benign
13	32376669	G	GA	BRCA2	NC_000013.11:g.32376673dup	NM_000059.4:c.8636dup	N2879Kfs*28	pathogenic
13	32339839	AT	A	BRCA2	NC_000013.11:g.32339841del	NM_000059.4:c.5486del	L1829Cfs*11	pathogenic
13	32339465	A	T	BRCA2	NC_000013.11:g.32339465A>T	NM_000059.4:c.5110A>T	R1704*	pathogenic
13	32316435	G	A	BRCA2	NC_000013.11:g.32316435G>A	NM_000059.4:c.-26G>A	?	benign
13	32363353	C	T	BRCA2	NC_000013.11:g.32363353C>T	NM_000059.4:c.8151C>T	A2717=	likely_benign
13	32330984	TG	T	BRCA2	NC_000013.11:g.32330985del	NM_000059.4:c.748del	V250*	pathogenic
13	32337761	ATATTGCAGAAGAG	A	BRCA2	NC_000013.11:g.32337764_32337776del	NM_000059.4:c.3409_3421del	L1137Hfs*9	pathogenic
13	32326609	C	A	BRCA2	NC_000013.11:g.32326609C>A	NM_000059.4:c.627C>A	L209=	likely_benign
13	32363531	A	T	BRCA2	NC_000013.11:g.32363531A>T	NM_000059.4:c.8329A>T	K2777*	pathogenic
13	32332398	G	GT	BRCA2	NC_000013.11:g.32332403dup	NM_000059.4:c.925dup	S309Ffs*6	pathogenic
13	32380071	T	G	BRCA2	NC_000013.11:g.32380071T>G	NM_000059.4:c.9182T>G	L3061*	pathogenic
13	32336794	TC	T	BRCA2	NC_000013.11:g.32336797del	NM_000059.4:c.2442del	M815Wfs*10	pathogenic
13	32332739	CA	C	BRCA2	NC_000013.11:g.32332743del	NM_000059.4:c.1265del	N422Ifs*8	pathogenic
13	32341093	A	G	BRCA2	NC_000013.11:g.32341093A>G	NM_000059.4:c.6738A>G	P2246=	likely_benign
13	32380116	G	T	BRCA2	NC_000013.11:g.32380116G>T	NM_000059.4:c.9227G>T	G3076V	pathogenic
13	32333062	C	T	BRCA2	NC_000013.11:g.32333062C>T	NM_000059.4:c.1584C>T	N528=	likely_benign
13	32339561	CAA	C	BRCA2	NC_000013.11:g.32339562_32339563del	NM_000059.4:c.5207_5208del	Q1736Rfs*6	pathogenic
13	32338518	CT	A	BRCA2	NC_000013.11:g.32338518_32338519delinsA	NM_000059.4:c.4163_4164delinsA	T1388Nfs*22	pathogenic
13	32339709	CTA	C	BRCA2	NC_000013.11:g.32339710_32339711del	NM_000059.4:c.5355_5356del	S1786Ffs*20	pathogenic
13	32357806	AGT	A	BRCA2	NC_000013.11:g.32357807_32357808del	NM_000059.4:c.7683_7684del	Q2561Hfs*4	pathogenic
13	32357747	T	TA	BRCA2	NC_000013.11:g.32357748dup	NM_000059.4:c.7624dup	T2542Nfs*6	pathogenic
13	32340391	CA	C	BRCA2	NC_000013.11:g.32340394del	NM_000059.4:c.6039del	V2014Yfs*26	pathogenic
13	32340372	G	GTA	BRCA2	NC_000013.11:g.32340373_32340374dup	NM_000059.4:c.6018_6019dup	T2007Ifs*34	pathogenic
13	32340273	AT	A	BRCA2	NC_000013.11:g.32340274del	NM_000059.4:c.5919del	N1973Kfs*31	pathogenic
13	32348048	G	GA	BRCA2	NC_000013.11:g.32348054dup	NM_000059.4:c.7007+1158dup	?	benign
13	32364848	C	T	BRCA2	NC_000013.11:g.32364848C>T	NM_000059.4:c.8331+1315C>T	?	benign
13	32338377	C	A	BRCA2	NC_000013.11:g.32338377C>A	NM_000059.4:c.4022C>A	S1341*	pathogenic
13	32363190	A	T	BRCA2	NC_000013.11:g.32363190A>T	NM_000059.4:c.7988A>T	E2663V	pathogenic
13	32338882	AC	A	BRCA2	NC_000013.11:g.32338885del	NM_000059.4:c.4530del	E1511Nfs*32	pathogenic
13	32337386	AC	A	BRCA2	NC_000013.11:g.32337387del	NM_000059.4:c.3032del	T1011Kfs*32	pathogenic
13	32337810	T	A	BRCA2	NC_000013.11:g.32337810T>A	NM_000059.4:c.3455T>A	L1152*	pathogenic
13	32336971	A	G	BRCA2	NC_000013.11:g.32336971A>G	NM_000059.4:c.2616A>G	K872=	likely_benign
13	32338064	GC	G	BRCA2	NC_000013.11:g.32338065del	NM_000059.4:c.3710del	A1237Vfs*2	pathogenic
13	32324693	A	G	BRCA2	NC_000013.11:g.32324693A>G	NM_000059.4:c.317-383A>G	?	benign
13	32379480	G	GT	BRCA2	NC_000013.11:g.32379481dup	NM_000059.4:c.8919dup	I2974Yfs*44	pathogenic
13	32333019	A	AG	BRCA2	NC_000013.11:g.32333020dup	NM_000059.4:c.1542dup	T515Dfs*12	pathogenic
13	32375831	A	ATTAC	BRCA2	NC_000013.11:g.32375832_32375835dup	NM_000059.4:c.8633-838_8633-835dup	?	benign
13	32338789	A	G	BRCA2	NC_000013.11:g.32338789A>G	NM_000059.4:c.4434A>G	L1478=	likely_benign
13	32332601	C	T	BRCA2	NC_000013.11:g.32332601C>T	NM_000059.4:c.1123C>T	P375S	benign
13	32337751	A	G	BRCA2	NC_000013.11:g.32337751A>G	NM_000059.4:c.3396A>G	K1132=	benign
13	32356458	A	AT	BRCA2	NC_000013.11:g.32356459dup	NM_000059.4:c.7467dup	I2490Yfs*7	pathogenic
13	32340775	T	TG	BRCA2	NC_000013.11:g.32340777dup	NM_000059.4:c.6422dup	S2142Ffs*5	pathogenic
13	32339271	TA	T	BRCA2	NC_000013.11:g.32339272del	NM_000059.4:c.4917del	H1640Mfs*4	pathogenic
13	32379349	GA	G	BRCA2	NC_000013.11:g.32379351del	NM_000059.4:c.8789del	N2930Ifs*7	pathogenic
13	32338103	G	T	BRCA2	NC_000013.11:g.32338103G>T	NM_000059.4:c.3748G>T	E1250*	pathogenic
13	32332715	CT	C	BRCA2	NC_000013.11:g.32332716del	NM_000059.4:c.1238del	L413Hfs*17	pathogenic
13	32333072	GA	G	BRCA2	NC_000013.11:g.32333075del	NM_000059.4:c.1597del	T533Lfs*25	pathogenic
13	32355087	A	AG	BRCA2	NC_000013.11:g.32355087_32355088insG	NM_000059.4:c.7234_7235insG	T2412Sfs*2	pathogenic
13	32340844	AC	A	BRCA2	NC_000013.11:g.32340845del	NM_000059.4:c.6490del	Q2164Sfs*4	pathogenic
13	32339573	T	TTA	BRCA2	NC_000013.11:g.32339574_32339575dup	NM_000059.4:c.5219_5220dup	S1741*	pathogenic
13	32338564	TTCAAA	T	BRCA2	NC_000013.11:g.32338566_32338570del	NM_000059.4:c.4211_4215del	S1404*	pathogenic
13	32362483	A	G	BRCA2	NC_000013.11:g.32362483A>G	NM_000059.4:c.7806-40A>G	?	benign
13	32341179	AG	A	BRCA2	NC_000013.11:g.32341180del	NM_000059.4:c.6825del	E2275Dfs*5	pathogenic
13	32326505	C	T	BRCA2	NC_000013.11:g.32326505C>T	NM_000059.4:c.523C>T	Q175*	pathogenic
13	32321612	G	C	BRCA2	NC_000013.11:g.32321612G>C	NM_000059.4:c.316+2287G>C	?	benign
13	32387360	C	T	BRCA2	NC_000013.11:g.32387360C>T	NM_000059.4:c.9256+7215C>T	?	benign
13	32397288	T	C	BRCA2	NC_000013.11:g.32397288T>C	NM_000059.4:c.9648+244T>C	?	benign
13	32339919	C	A	BRCA2	NC_000013.11:g.32339919C>A	NM_000059.4:c.5564C>A	S1855*	pathogenic
13	32341000	C	G	BRCA2	NC_000013.11:g.32341000C>G	NM_000059.4:c.6645C>G	Y2215*	pathogenic
13	32326503	GT	G	BRCA2	NC_000013.11:g.32326504del	NM_000059.4:c.522del	Q175Rfs*10	pathogenic
13	32354968	CAAGCA	GC	BRCA2	NC_000013.11:g.32354968_32354973delinsGC	NM_000059.4:c.7115_7120delinsGC	S2372Cfs*3	pathogenic
13	32344161	G	A	BRCA2	NC_000013.11:g.32344161G>A	NM_000059.4:c.6842-397G>A	?	benign
13	32319231	G	A	BRCA2	NC_000013.11:g.32319231G>A	NM_000059.4:c.222G>A	L74=	likely_benign
13	32316497	G	T	BRCA2	NC_000013.11:g.32316497G>T	NM_000059.4:c.37G>T	E13*	pathogenic
13	32362580	T	A	BRCA2	NC_000013.11:g.32362580T>A	NM_000059.4:c.7863T>A	Y2621*	pathogenic
13	32340742	A	AT	BRCA2	NC_000013.11:g.32340745dup	NM_000059.4:c.6390dup	K2131*	pathogenic
13	32357902	G	GA	BRCA2	NC_000013.11:g.32357905dup	NM_000059.4:c.7781dup	A2595Gfs*8	pathogenic
13	32340137	G	T	BRCA2	NC_000013.11:g.32340137G>T	NM_000059.4:c.5782G>T	E1928*	pathogenic
13	32394901	GA	G	BRCA2	NC_000013.11:g.32394902del	NM_000059.4:c.9470del	E3157Gfs*6	pathogenic
13	32348993	G	T	BRCA2	NC_000013.11:g.32348993G>T	NM_000059.4:c.7007+2097G>T	?	benign
13	32336401	C	T	BRCA2	NC_000013.11:g.32336401C>T	NM_000059.4:c.2046C>T	I682=	likely_benign
13	32336214	G	T	BRCA2	NC_000013.11:g.32336214G>T	NM_000059.4:c.1910-51G>T	?	benign
13	32387052	G	GC	BRCA2	NC_000013.11:g.32387053dup	NM_000059.4:c.9256+6908dup	?	benign
13	32336562	CA	C	BRCA2	NC_000013.11:g.32336563del	NM_000059.4:c.2208del	A737Hfs*35	pathogenic
13	32338596	C	T	BRCA2	NC_000013.11:g.32338596C>T	NM_000059.4:c.4241C>T	T1414M	benign
13	32337698	TC	T	BRCA2	NC_000013.11:g.32337699del	NM_000059.4:c.3344del	S1115Lfs*4	pathogenic
13	32315532	C	T	BRCA2	NC_000013.11:g.32315532C>T	NM_000059.4:c.-175C>T	?	benign
13	32337599	A	T	BRCA2	NC_000013.11:g.32337599A>T	NM_000059.4:c.3244A>T	K1082*	pathogenic
13	32332814	T	C	BRCA2	NC_000013.11:g.32332814T>C	NM_000059.4:c.1336T>C	L446=	likely_benign
13	32337708	TA	T	BRCA2	NC_000013.11:g.32337709del	NM_000059.4:c.3354del	E1119Kfs*31	pathogenic
13	32340998	TACTCC	T	BRCA2	NC_000013.11:g.32341000_32341004del	NM_000059.4:c.6645_6649del	Y2215*	pathogenic
13	32338815	AAC	A	BRCA2	NC_000013.11:g.32338819_32338820del	NM_000059.4:c.4464_4465del	H1488Qfs*25	pathogenic
13	32394750	G	A	BRCA2	NC_000013.11:g.32394750G>A	NM_000059.4:c.9318G>A	W3106*	pathogenic
13	32333143	A	C	BRCA2	NC_000013.11:g.32333143A>C	NM_000059.4:c.1665A>C	P555=	likely_benign
13	32338654	GA	G	BRCA2	NC_000013.11:g.32338659del	NM_000059.4:c.4304del	N1435Ifs*13	pathogenic
13	32363197	T	C	BRCA2	NC_000013.11:g.32363197T>C	NM_000059.4:c.7995T>C	D2665=	likely_benign
13	32340708	T	TA	BRCA2	NC_000013.11:g.32340711dup	NM_000059.4:c.6356dup	N2119Kfs*10	pathogenic
13	32380085	C	T	BRCA2	NC_000013.11:g.32380085C>T	NM_000059.4:c.9196C>T	Q3066*	pathogenic
13	32339461	A	G	BRCA2	NC_000013.11:g.32339461A>G	NM_000059.4:c.5106A>G	P1702=	likely_benign
13	32340078	TA	T	BRCA2	NC_000013.11:g.32340079del	NM_000059.4:c.5724del	D1909Ifs*54	pathogenic
13	32341077	C	CA	BRCA2	NC_000013.11:g.32341078dup	NM_000059.4:c.6723dup	D2242Rfs*3	pathogenic
13	32333147	TTAATTGA	T	BRCA2	NC_000013.11:g.32333152_32333158del	NM_000059.4:c.1674_1680del	I558Mfs*13	pathogenic
13	32340208	T	TTTAG	BRCA2	NC_000013.11:g.32340210_32340211insAGTT	NM_000059.4:c.5855_5856insAGTT	E1953Vfs*8	pathogenic
13	32332877	A	T	BRCA2	NC_000013.11:g.32332877A>T	NM_000059.4:c.1399A>T	K467*	pathogenic
13	32332876	TAAGAGAGATG	T	BRCA2	NC_000013.11:g.32332882_32332891del	NM_000059.4:c.1404_1413del	R468Sfs*14	pathogenic
13	32332459	G	A	BRCA2	NC_000013.11:g.32332459G>A	NM_000059.4:c.981G>A	K327=	likely_benign
13	32340663	CA	C	BRCA2	NC_000013.11:g.32340668del	NM_000059.4:c.6313del	I2105Yfs*14	pathogenic
13	32378757	G	A	BRCA2	NC_000013.11:g.32378757G>A	NM_000059.4:c.8755-560G>A	?	benign
13	32337184	TAA	T	BRCA2	NC_000013.11:g.32337189_32337190del	NM_000059.4:c.2834_2835del	K945Rfs*13	pathogenic
13	32398233	T	C	BRCA2	NC_000013.11:g.32398233T>C	NM_000059.4:c.9720T>C	V3240=	likely_benign
13	32356478	A	AT	BRCA2	NC_000013.11:g.32356478_32356479insT	NM_000059.4:c.7486_7487insT	K2496Ifs*43	pathogenic
13	32319252	CA	C	BRCA2	NC_000013.11:g.32319255del	NM_000059.4:c.246del	E83Sfs*4	pathogenic
13	32338161	TTG	T	BRCA2	NC_000013.11:g.32338163_32338164del	NM_000059.4:c.3808_3809del	V1270Ffs*4	pathogenic
13	32398623	G	A	BRCA2	NC_000013.11:g.32398623G>A	NM_000059.4:c.10110G>A	R3370=	benign
13	32339531	GA	G	BRCA2	NC_000013.11:g.32339535del	NM_000059.4:c.5180del	N1727Mfs*14	pathogenic
13	32398747	A	G	BRCA2	NC_000013.11:g.32398747A>G	NM_000059.4:c.10234A>G	I3412V	benign
13	32336300	C	T	BRCA2	NC_000013.11:g.32336300C>T	NM_000059.4:c.1945C>T	Q649*	pathogenic
13	32340702	A	G	BRCA2	NC_000013.11:g.32340702A>G	NM_000059.4:c.6347A>G	H2116R	benign
13	32379335	C	T	BRCA2	NC_000013.11:g.32379335C>T	NM_000059.4:c.8773C>T	Q2925*	pathogenic
13	32340783	C	G	BRCA2	NC_000013.11:g.32340783C>G	NM_000059.4:c.6428C>G	S2143*	pathogenic
13	32337116	A	AT	BRCA2	NC_000013.11:g.32337120dup	NM_000059.4:c.2765dup	K923Qfs*13	pathogenic
13	32338778	A	AT	BRCA2	NC_000013.11:g.32338779dup	NM_000059.4:c.4424dup	M1475Ifs*7	pathogenic
13	32337127	C	CT	BRCA2	NC_000013.11:g.32337128dup	NM_000059.4:c.2773dup	S925Ffs*11	pathogenic
13	32319176	A	C	BRCA2	NC_000013.11:g.32319176A>C	NM_000059.4:c.167A>C	N56T	benign
13	32379495	C	CA	BRCA2	NC_000013.11:g.32379502dup	NM_000059.4:c.8940dup	E2981Rfs*37	pathogenic
13	32348194	A	C	BRCA2	NC_000013.11:g.32348194A>C	NM_000059.4:c.7007+1298A>C	?	benign
13	32340113	G	GT	BRCA2	NC_000013.11:g.32340118dup	NM_000059.4:c.5763dup	A1922Cfs*2	pathogenic
13	32336624	A	T	BRCA2	NC_000013.11:g.32336624A>T	NM_000059.4:c.2269A>T	K757*	pathogenic
13	32332406	TTA	T	BRCA2	NC_000013.11:g.32332408_32332409del	NM_000059.4:c.930_931del	C311Ffs*3	pathogenic
13	32338072	A	G	BRCA2	NC_000013.11:g.32338072A>G	NM_000059.4:c.3717A>G	K1239=	likely_benign
13	32332457	A	T	BRCA2	NC_000013.11:g.32332457A>T	NM_000059.4:c.979A>T	K327*	pathogenic
13	32338265	AC	A	BRCA2	NC_000013.11:g.32338266del	NM_000059.4:c.3911del	T1304Ifs*31	pathogenic
13	32340891	T	TA	BRCA2	NC_000013.11:g.32340891_32340892insA	NM_000059.4:c.6536_6537insA	L2180Ffs*9	pathogenic
13	32337328	CA	C	BRCA2	NC_000013.11:g.32337331del	NM_000059.4:c.2976del	K992Nfs*6	pathogenic
13	32340995	A	AC	BRCA2	NC_000013.11:g.32340996dup	NM_000059.4:c.6641dup	Y2215Lfs*10	pathogenic
13	32337217	G	A	BRCA2	NC_000013.11:g.32337217G>A	NM_000059.4:c.2862G>A	E954=	likely_benign
13	32340845	CAG	GACT	BRCA2	NC_000013.11:g.32340845_32340847delinsGACT	NM_000059.4:c.6490_6492delinsGACT	Q2164Dfs*12	pathogenic
13	32362560	AT	A	BRCA2	NC_000013.11:g.32362563del	NM_000059.4:c.7846del	S2616Lfs*32	pathogenic
13	32379803	G	T	BRCA2	NC_000013.11:g.32379803G>T	NM_000059.4:c.9007G>T	G3003*	pathogenic
13	32339508	ATAATT	A	BRCA2	NC_000013.11:g.32339509_32339513del	NM_000059.4:c.5154_5158del	N1719Kfs*6	pathogenic
13	32395918	T	G	BRCA2	NC_000013.11:g.32395918T>G	NM_000059.4:c.9502-980T>G	?	benign
13	32316528	G	T	BRCA2	NC_000013.11:g.32316528G>T	NM_000059.4:c.67+1G>T	?	pathogenic
13	32340479	C	CA	BRCA2	NC_000013.11:g.32340484dup	NM_000059.4:c.6129dup	G2044Rfs*5	pathogenic
13	32357774	A	T	BRCA2	NC_000013.11:g.32357774A>T	NM_000059.4:c.7650A>T	I2550=	likely_benign
13	32379868	CAT	C	BRCA2	NC_000013.11:g.32379870_32379871del	NM_000059.4:c.9074_9075del	I3025Tfs*18	pathogenic
13	32338090	G	A	BRCA2	NC_000013.11:g.32338090G>A	NM_000059.4:c.3735G>A	E1245=	likely_benign
13	32340982	A	C	BRCA2	NC_000013.11:g.32340982A>C	NM_000059.4:c.6627A>C	I2209=	likely_benign
13	32340079	A	G	BRCA2	NC_000013.11:g.32340079A>G	NM_000059.4:c.5724A>G	L1908=	likely_benign
13	32334210	C	T	BRCA2	NC_000013.11:g.32334210C>T	NM_000059.4:c.1909+823C>T	?	benign
13	32379855	CT	C	BRCA2	NC_000013.11:g.32379856del	NM_000059.4:c.9060del	E3021Kfs*7	pathogenic
13	32336617	A	G	BRCA2	NC_000013.11:g.32336617A>G	NM_000059.4:c.2262A>G	Q754=	likely_benign
13	32336446	A	G	BRCA2	NC_000013.11:g.32336446A>G	NM_000059.4:c.2091A>G	K697=	likely_benign
13	32380063	CA	C	BRCA2	NC_000013.11:g.32380066del	NM_000059.4:c.9177del	K3059Nfs*3	pathogenic
13	32338294	C	A	BRCA2	NC_000013.11:g.32338294C>A	NM_000059.4:c.3939C>A	Y1313*	pathogenic
13	32384015	G	A	BRCA2	NC_000013.11:g.32384015G>A	NM_000059.4:c.9256+3870G>A	?	benign
13	32382598	A	AG	BRCA2	NC_000013.11:g.32382599dup	NM_000059.4:c.9256+2454dup	?	benign
13	32339429	T	TA	BRCA2	NC_000013.11:g.32339429_32339430insA	NM_000059.4:c.5074_5075insA	W1692*	pathogenic
13	32397002	G	A	BRCA2	NC_000013.11:g.32397002G>A	NM_000059.4:c.9606G>A	P3202=	likely_benign
13	32355104	C	T	BRCA2	NC_000013.11:g.32355104C>T	NM_000059.4:c.7251C>T	H2417=	likely_benign
13	32339320	C	GA	BRCA2	NC_000013.11:g.32339320delinsGA	NM_000059.4:c.4965delinsGA	Y1655*	pathogenic
13	32333025	TC	T	BRCA2	NC_000013.11:g.32333026del	NM_000059.4:c.1548del	F516Lfs*9	pathogenic
13	32369041	C	G	BRCA2	NC_000013.11:g.32369041C>G	NM_000059.4:c.8332-1361C>G	?	benign
13	32338311	ATG	A	BRCA2	NC_000013.11:g.32338312_32338313del	NM_000059.4:c.3957_3958del	N1319Kfs*3	pathogenic
13	32332669	AC	A	BRCA2	NC_000013.11:g.32332670del	NM_000059.4:c.1192del	L398*	pathogenic
13	32337058	T	A	BRCA2	NC_000013.11:g.32337058T>A	NM_000059.4:c.2703T>A	L901=	likely_benign
13	32336399	ATCTC	A	BRCA2	NC_000013.11:g.32336402_32336405del	NM_000059.4:c.2047_2050del	S683Rfs*46	pathogenic
13	32332981	CAA	C	BRCA2	NC_000013.11:g.32332985_32332986del	NM_000059.4:c.1507_1508del	K503Vfs*10	pathogenic
13	32352517	T	G	BRCA2	NC_000013.11:g.32352517T>G	NM_000059.4:c.7008-2344T>G	?	benign
13	32326575	T	TAGCTA	BRCA2	NC_000013.11:g.32326576_32326580dup	NM_000059.4:c.594_598dup	T200Kfs*13	pathogenic
13	32339344	CAT	C	BRCA2	NC_000013.11:g.32339345_32339346del	NM_000059.4:c.4990_4991del	I1664*	pathogenic
13	32357842	T	TA	BRCA2	NC_000013.11:g.32357843dup	NM_000059.4:c.7719dup	W2574Mfs*10	pathogenic
13	32337855	T	TA	BRCA2	NC_000013.11:g.32337857dup	NM_000059.4:c.3502dup	M1168Nfs*16	pathogenic
13	32355114	C	T	BRCA2	NC_000013.11:g.32355114C>T	NM_000059.4:c.7261C>T	Q2421*	pathogenic
13	32337345	T	G	BRCA2	NC_000013.11:g.32337345T>G	NM_000059.4:c.2990T>G	L997*	pathogenic
13	32337739	T	C	BRCA2	NC_000013.11:g.32337739T>C	NM_000059.4:c.3384T>C	T1128=	likely_benign
13	32336450	C	T	BRCA2	NC_000013.11:g.32336450C>T	NM_000059.4:c.2095C>T	Q699*	pathogenic
13	32338919	T	C	BRCA2	NC_000013.11:g.32338919T>C	NM_000059.4:c.4564T>C	L1522=	likely_benign
13	32385397	A	G	BRCA2	NC_000013.11:g.32385397A>G	NM_000059.4:c.9256+5252A>G	?	benign
13	32337850	T	C	BRCA2	NC_000013.11:g.32337850T>C	NM_000059.4:c.3495T>C	H1165=	benign
13	32340037	C	G	BRCA2	NC_000013.11:g.32340037C>G	NM_000059.4:c.5682C>G	Y1894*	pathogenic
13	32325083	T	C	BRCA2	NC_000013.11:g.32325083T>C	NM_000059.4:c.324T>C	N108=	likely_benign
13	32339992	GAATA	G	BRCA2	NC_000013.11:g.32339996_32339999del	NM_000059.4:c.5641_5644del	K1881Qfs*27	pathogenic
13	32326548	A	AG	BRCA2	NC_000013.11:g.32326548_32326549insG	NM_000059.4:c.566_567insG	D189Efs*3	pathogenic
13	32363203	C	CAGAAGAT	BRCA2	NC_000013.11:g.32363204_32363210dup	NM_000059.4:c.8002_8008dup	S2670*	pathogenic
13	32356583	GT	G	BRCA2	NC_000013.11:g.32356585del	NM_000059.4:c.7593del	S2533Lfs*18	pathogenic
13	32332731	C	A	BRCA2	NC_000013.11:g.32332731C>A	NM_000059.4:c.1253C>A	S418*	pathogenic
13	32331491	C	A	BRCA2	NC_000013.11:g.32331491C>A	NM_000059.4:c.793+461C>A	?	benign
13	32330360	G	A	BRCA2	NC_000013.11:g.32330360G>A	NM_000059.4:c.682-559G>A	?	benign
13	32333167	G	A	BRCA2	NC_000013.11:g.32333167G>A	NM_000059.4:c.1689G>A	W563*	pathogenic
13	32340703	C	CT	BRCA2	NC_000013.11:g.32340704dup	NM_000059.4:c.6349dup	C2117Lfs*12	pathogenic
13	32387015	G	A	BRCA2	NC_000013.11:g.32387015G>A	NM_000059.4:c.9256+6870G>A	?	benign
13	32332991	AT	A	BRCA2	NC_000013.11:g.32332992del	NM_000059.4:c.1514del	I505Nfs*4	pathogenic
13	32336731	C	A	BRCA2	NC_000013.11:g.32336731C>A	NM_000059.4:c.2376C>A	Y792*	pathogenic
13	32370416	TA	T	BRCA2	NC_000013.11:g.32370417del	NM_000059.4:c.8347del	T2783Lfs*38	pathogenic
13	32340363	TAGAAG	T	BRCA2	NC_000013.11:g.32340365_32340369del	NM_000059.4:c.6010_6014del	E2004*	pathogenic
13	32351338	T	C	BRCA2	NC_000013.11:g.32351338T>C	NM_000059.4:c.7008-3523T>C	?	benign
13	32355018	AG	A	BRCA2	NC_000013.11:g.32355019del	NM_000059.4:c.7166del	R2389Kfs*5	pathogenic
13	32338168	A	AC	BRCA2	NC_000013.11:g.32338168_32338169insC	NM_000059.4:c.3813_3814insC	M1272Hfs*3	pathogenic
13	32333119	A	G	BRCA2	NC_000013.11:g.32333119A>G	NM_000059.4:c.1641A>G	S547=	likely_benign
13	32353757	C	T	BRCA2	NC_000013.11:g.32353757C>T	NM_000059.4:c.7008-1104C>T	?	benign
13	32338453	TA	T	BRCA2	NC_000013.11:g.32338456del	NM_000059.4:c.4101del	K1367Nfs*7	pathogenic
13	32397148	AT	A	BRCA2	NC_000013.11:g.32397150del	NM_000059.4:c.9648+106del	?	benign
13	32337180	CAATT	C	BRCA2	NC_000013.11:g.32337183_32337186del	NM_000059.4:c.2828_2831del	I943Kfs*16	pathogenic
13	32337646	TA	T	BRCA2	NC_000013.11:g.32337648del	NM_000059.4:c.3293del	N1098Ifs*6	pathogenic
13	32338339	T	C	BRCA2	NC_000013.11:g.32338339T>C	NM_000059.4:c.3984T>C	S1328=	likely_benign
13	32336544	AAGAAG	A	BRCA2	NC_000013.11:g.32336547_32336551del	NM_000059.4:c.2192_2196del	E731Gfs*18	pathogenic
13	32398575	T	C	BRCA2	NC_000013.11:g.32398575T>C	NM_000059.4:c.10062T>C	S3354=	likely_benign
13	32376960	A	G	BRCA2	NC_000013.11:g.32376960A>G	NM_000059.4:c.8754+169A>G	?	benign
13	32337311	A	AG	BRCA2	NC_000013.11:g.32337311_32337312insG	NM_000059.4:c.2956_2957insG	N986Rfs*2	pathogenic
13	32339429	TG	T	BRCA2	NC_000013.11:g.32339431del	NM_000059.4:c.5076del	W1692Cfs*14	pathogenic
13	32333365	TA	T	BRCA2	NC_000013.11:g.32333366del	NM_000059.4:c.1888del	T630Hfs*14	pathogenic
13	32331135	C	T	BRCA2	NC_000013.11:g.32331135C>T	NM_000059.4:c.793+105C>T	?	benign
13	32341165	A	G	BRCA2	NC_000013.11:g.32341165A>G	NM_000059.4:c.6810A>G	G2270=	likely_benign
13	32339228	GAA	G	BRCA2	NC_000013.11:g.32339231_32339232del	NM_000059.4:c.4876_4877del	N1626Sfs*12	pathogenic
13	32333297	A	T	BRCA2	NC_000013.11:g.32333297A>T	NM_000059.4:c.1819A>T	K607*	pathogenic
13	32317314	CAAGT	C	BRCA2	NC_000013.11:g.32317315_32317318del	NM_000059.4:c.67+788_67+791del	?	benign
13	32340609	T	G	BRCA2	NC_000013.11:g.32340609T>G	NM_000059.4:c.6254T>G	L2085*	pathogenic
13	32339122	A	G	BRCA2	NC_000013.11:g.32339122A>G	NM_000059.4:c.4767A>G	P1589=	likely_benign
13	32333318	A	AT	BRCA2	NC_000013.11:g.32333320dup	NM_000059.4:c.1842dup	N615*	pathogenic
13	32363455	T	C	BRCA2	NC_000013.11:g.32363455T>C	NM_000059.4:c.8253T>C	I2751=	likely_benign
13	32340898	A	G	BRCA2	NC_000013.11:g.32340898A>G	NM_000059.4:c.6543A>G	G2181=	likely_benign
13	32383682	G	A	BRCA2	NC_000013.11:g.32383682G>A	NM_000059.4:c.9256+3537G>A	?	benign
13	32394705	CT	C	BRCA2	NC_000013.11:g.32394706del	NM_000059.4:c.9274del	Y3092Ifs*12	pathogenic
13	32355194	T	C	BRCA2	NC_000013.11:g.32355194T>C	NM_000059.4:c.7341T>C	N2447=	likely_benign
13	32339488	A	G	BRCA2	NC_000013.11:g.32339488A>G	NM_000059.4:c.5133A>G	V1711=	likely_benign
13	32380114	AG	A	BRCA2	NC_000013.11:g.32380116del	NM_000059.4:c.9227del	G3076Dfs*7	pathogenic
13	32332358	G	T	BRCA2	NC_000013.11:g.32332358G>T	NM_000059.4:c.880G>T	E294*	pathogenic
13	32354993	TC	T	BRCA2	NC_000013.11:g.32354995del	NM_000059.4:c.7142del	P2381Hfs*13	pathogenic
13	32326138	AGAGAT	A	BRCA2	NC_000013.11:g.32326139_32326143del	NM_000059.4:c.464_468del	R155Kfs*26	pathogenic
13	32317246	T	A	BRCA2	NC_000013.11:g.32317246T>A	NM_000059.4:c.67+719T>A	?	benign
13	32394857	ATT	A	BRCA2	NC_000013.11:g.32394861_32394862del	NM_000059.4:c.9429_9430del	S3144Cfs*5	pathogenic
13	32363288	TTGAGCGCAAATATATC	T	BRCA2	NC_000013.11:g.32363292_32363307del	NM_000059.4:c.8090_8105del	S2697Kfs*31	pathogenic
13	32355192	AAT	A	BRCA2	NC_000013.11:g.32355194_32355195del	NM_000059.4:c.7341_7342del	N2447Kfs*3	pathogenic
13	32363293	C	T	BRCA2	NC_000013.11:g.32363293C>T	NM_000059.4:c.8091C>T	S2697=	likely_benign
13	32363516	GAATCTCTTATGTTA	G	BRCA2	NC_000013.11:g.32363519_32363532del	NM_000059.4:c.8317_8330del	S2773Dfs*4	pathogenic
13	32368578	C	T	BRCA2	NC_000013.11:g.32368578C>T	NM_000059.4:c.8332-1824C>T	?	benign
13	32331011	A	G	BRCA2	NC_000013.11:g.32331011A>G	NM_000059.4:c.774A>G	Q258=	likely_benign
13	32354876	T	TTG	BRCA2	NC_000013.11:g.32354876_32354877insTG	NM_000059.4:c.7023_7024insTG	Q2342Cfs*26	pathogenic
13	32339924	G	T	BRCA2	NC_000013.11:g.32339924G>T	NM_000059.4:c.5569G>T	E1857*	pathogenic
13	32339152	TA	T	BRCA2	NC_000013.11:g.32339154del	NM_000059.4:c.4799del	N1600Mfs*17	pathogenic
13	32336375	GA	G	BRCA2	NC_000013.11:g.32336378del	NM_000059.4:c.2023del	T675Hfs*7	pathogenic
13	32319178	T	TA	BRCA2	NC_000013.11:g.32319179dup	NM_000059.4:c.170dup	Y57*	pathogenic
13	32338465	C	T	BRCA2	NC_000013.11:g.32338465C>T	NM_000059.4:c.4110C>T	G1370=	likely_benign
13	32339943	AAGAC	A	BRCA2	NC_000013.11:g.32339945_32339948del	NM_000059.4:c.5590_5593del	D1864Yfs*9	pathogenic
13	32338630	T	TA	BRCA2	NC_000013.11:g.32338631dup	NM_000059.4:c.4276dup	T1426Nfs*12	pathogenic
13	32376725	T	C	BRCA2	NC_000013.11:g.32376725T>C	NM_000059.4:c.8688T>C	R2896=	likely_benign
13	32398665	A	T	BRCA2	NC_000013.11:g.32398665A>T	NM_000059.4:c.10152A>T	R3384=	likely_benign
13	32332570	T	C	BRCA2	NC_000013.11:g.32332570T>C	NM_000059.4:c.1092T>C	D364=	likely_benign
13	32355201	AATGAC	A	BRCA2	NC_000013.11:g.32355203_32355207del	NM_000059.4:c.7350_7354del	N2450Kfs*2	pathogenic
13	32338030	A	G	BRCA2	NC_000013.11:g.32338030A>G	NM_000059.4:c.3675A>G	T1225=	likely_benign
13	32340775	T	TA	BRCA2	NC_000013.11:g.32340775_32340776insA	NM_000059.4:c.6420_6421insA	G2141Rfs*6	pathogenic
13	32370460	A	AC	BRCA2	NC_000013.11:g.32370463dup	NM_000059.4:c.8393dup	R2799*	pathogenic
13	32338131	G	GT	BRCA2	NC_000013.11:g.32338134dup	NM_000059.4:c.3779dup	L1260Ffs*5	pathogenic
13	32390504	T	C	BRCA2	NC_000013.11:g.32390504T>C	NM_000059.4:c.9257-4185T>C	?	benign
13	32337620	C	T	BRCA2	NC_000013.11:g.32337620C>T	NM_000059.4:c.3265C>T	Q1089*	pathogenic
13	32336881	A	G	BRCA2	NC_000013.11:g.32336881A>G	NM_000059.4:c.2526A>G	V842=	likely_benign
13	32345879	G	A	BRCA2	NC_000013.11:g.32345879G>A	NM_000059.4:c.6938-948G>A	?	benign
13	32339474	AC	A	BRCA2	NC_000013.11:g.32339475del	NM_000059.4:c.5120del	T1707Mfs*5	pathogenic
13	32329444	C	T	BRCA2	NC_000013.11:g.32329444C>T	NM_000059.4:c.633C>T	V211=	likely_benign
13	32394823	TC	T	BRCA2	NC_000013.11:g.32394825del	NM_000059.4:c.9393del	K3132Nfs*31	pathogenic
13	32337807	TC	T	BRCA2	NC_000013.11:g.32337808del	NM_000059.4:c.3453del	L1152*	pathogenic
13	32318748	G	A	BRCA2	NC_000013.11:g.32318748G>A	NM_000059.4:c.68-329G>A	?	benign
13	32394854	GA	G	BRCA2	NC_000013.11:g.32394855del	NM_000059.4:c.9423del	D3142Ifs*21	pathogenic
13	32380037	C	T	BRCA2	NC_000013.11:g.32380037C>T	NM_000059.4:c.9148C>T	Q3050*	pathogenic
13	32398875	A	C	BRCA2	NC_000013.11:g.32398875A>C	NM_000059.4:c.*105A>C	?	benign
13	32325167	TTCTTG	T	BRCA2	NC_000013.11:g.32325172_32325176del	NM_000059.4:c.413_417del	C138*	pathogenic
13	32338803	CA	C	BRCA2	NC_000013.11:g.32338804del	NM_000059.4:c.4449del	D1484Tfs*2	pathogenic
13	32379491	TA	T	BRCA2	NC_000013.11:g.32379492del	NM_000059.4:c.8930del	Y2977Ffs*11	pathogenic
13	32340010	C	A	BRCA2	NC_000013.11:g.32340010C>A	NM_000059.4:c.5655C>A	C1885*	pathogenic
13	32333281	AG	A	BRCA2	NC_000013.11:g.32333283del	NM_000059.4:c.1805del	G602Efs*12	pathogenic
13	32363331	GT	G	BRCA2	NC_000013.11:g.32363332del	NM_000059.4:c.8130del	S2710Rfs*23	pathogenic
13	32332666	T	TCCAA	BRCA2	NC_000013.11:g.32332667_32332668insCAAC	NM_000059.4:c.1189_1190insCAAC	Q397Pfs*25	pathogenic
13	32354856	T	C	BRCA2	NC_000013.11:g.32354856T>C	NM_000059.4:c.7008-5T>C	?	likely_benign
13	32329484	AC	A	BRCA2	NC_000013.11:g.32329485del	NM_000059.4:c.674del	T225Ifs*5	pathogenic
13	32340985	AGTTT	A	BRCA2	NC_000013.11:g.32340989_32340992del	NM_000059.4:c.6634_6637del	C2212Lfs*16	pathogenic
13	32338597	G	T	BRCA2	NC_000013.11:g.32338597G>T	NM_000059.4:c.4242G>T	T1414=	likely_benign
13	32338411	TGAAAC	T	BRCA2	NC_000013.11:g.32338413_32338417del	NM_000059.4:c.4058_4062del	E1353Gfs*6	pathogenic
13	32333147	TTAATTGATAATGGA	T	BRCA2	NC_000013.11:g.32333148_32333161del	NM_000059.4:c.1670_1683del	L557*	pathogenic
13	32330930	C	CT	BRCA2	NC_000013.11:g.32330931dup	NM_000059.4:c.694dup	Y232Lfs*6	pathogenic
13	32332532	T	TA	BRCA2	NC_000013.11:g.32332533dup	NM_000059.4:c.1055dup	Y352*	pathogenic
13	32338840	C	A	BRCA2	NC_000013.11:g.32338840C>A	NM_000059.4:c.4485C>A	V1495=	likely_benign
13	32339662	T	C	BRCA2	NC_000013.11:g.32339662T>C	NM_000059.4:c.5307T>C	D1769=	likely_benign
13	32340592	GT	G	BRCA2	NC_000013.11:g.32340594del	NM_000059.4:c.6239del	L2080*	pathogenic
13	32379787	T	G	BRCA2	NC_000013.11:g.32379787T>G	NM_000059.4:c.8991T>G	Y2997*	pathogenic
13	32340107	CAT	C	BRCA2	NC_000013.11:g.32340109_32340110del	NM_000059.4:c.5754_5755del	H1918Qfs*5	pathogenic
13	32339287	AAAAG	A	BRCA2	NC_000013.11:g.32339291_32339294del	NM_000059.4:c.4936_4939del	E1646Qfs*23	pathogenic
13	32356594	G	A	BRCA2	NC_000013.11:g.32356594G>A	NM_000059.4:c.7602G>A	A2534=	likely_benign
13	32339599	C	T	BRCA2	NC_000013.11:g.32339599C>T	NM_000059.4:c.5244C>T	S1748=	likely_benign
13	32341077	CAG	C	BRCA2	NC_000013.11:g.32341079_32341080del	NM_000059.4:c.6724_6725del	D2242Ffs*2	pathogenic
13	32347169	G	A	BRCA2	NC_000013.11:g.32347169G>A	NM_000059.4:c.7007+273G>A	?	benign
13	32339421	C	CA	BRCA2	NC_000013.11:g.32339428dup	NM_000059.4:c.5073dup	W1692Mfs*3	pathogenic
13	32338385	AATGAT	C	BRCA2	NC_000013.11:g.32338385_32338390delinsC	NM_000059.4:c.4030_4035delinsC	N1344Hfs*6	pathogenic
13	32325155	T	A	BRCA2	NC_000013.11:g.32325155T>A	NM_000059.4:c.396T>A	C132*	pathogenic
13	32338181	GA	G	BRCA2	NC_000013.11:g.32338185del	NM_000059.4:c.3830del	N1277Ifs*7	pathogenic
13	32333378	GC	G	BRCA2	NC_000013.11:g.32333379del	NM_000059.4:c.1901del	A634Vfs*10	pathogenic
13	32341095	GTCATGCCACACAT	G	BRCA2	NC_000013.11:g.32341098_32341110del	NM_000059.4:c.6743_6755del	H2248Lfs*28	pathogenic
13	32338762	CATAAG	C	BRCA2	NC_000013.11:g.32338764_32338768del	NM_000059.4:c.4409_4413del	I1470Kfs*10	pathogenic
13	32340511	A	G	BRCA2	NC_000013.11:g.32340511A>G	NM_000059.4:c.6156A>G	S2052=	likely_benign
13	32344085	A	G	BRCA2	NC_000013.11:g.32344085A>G	NM_000059.4:c.6842-473A>G	?	benign
13	32370521	T	A	BRCA2	NC_000013.11:g.32370521T>A	NM_000059.4:c.8451T>A	C2817*	pathogenic
13	32354909	T	C	BRCA2	NC_000013.11:g.32354909T>C	NM_000059.4:c.7056T>C	P2352=	likely_benign
13	32337620	CAG	C	BRCA2	NC_000013.11:g.32337622_32337623del	NM_000059.4:c.3267_3268del	Q1089Hfs*9	pathogenic
13	32326497	A	G	BRCA2	NC_000013.11:g.32326497A>G	NM_000059.4:c.517-2A>G	?	pathogenic
13	32340418	TTCAGACCAGC	T	BRCA2	NC_000013.11:g.32340422_32340431del	NM_000059.4:c.6067_6076del	D2023Qfs*14	pathogenic
13	32337572	C	T	BRCA2	NC_000013.11:g.32337572C>T	NM_000059.4:c.3217C>T	Q1073*	pathogenic
13	32370985	C	A	BRCA2	NC_000013.11:g.32370985C>A	NM_000059.4:c.8517C>A	Y2839*	pathogenic
13	32339896	CA	C	BRCA2	NC_000013.11:g.32339897del	NM_000059.4:c.5542del	S1848Vfs*15	pathogenic
13	32379844	TA	T	BRCA2	NC_000013.11:g.32379848del	NM_000059.4:c.9052del	S3018Vfs*10	pathogenic
13	32363189	G	T	BRCA2	NC_000013.11:g.32363189G>T	NM_000059.4:c.7987G>T	E2663*	pathogenic
13	32319231	G	C	BRCA2	NC_000013.11:g.32319231G>C	NM_000059.4:c.222G>C	L74=	likely_benign
13	32340887	C	CT	BRCA2	NC_000013.11:g.32340887_32340888insT	NM_000059.4:c.6532_6533insT	H2178Lfs*11	pathogenic
13	32362604	G	A	BRCA2	NC_000013.11:g.32362604G>A	NM_000059.4:c.7887G>A	W2629*	pathogenic
13	32341030	A	G	BRCA2	NC_000013.11:g.32341030A>G	NM_000059.4:c.6675A>G	T2225=	likely_benign
13	32340153	ACC	A	BRCA2	NC_000013.11:g.32340154_32340155del	NM_000059.4:c.5799_5800del	N1933Kfs*11	pathogenic
13	32340202	T	TGTTA	BRCA2	NC_000013.11:g.32340206_32340209dup	NM_000059.4:c.5851_5854dup	L1952*	pathogenic
13	32338721	G	T	BRCA2	NC_000013.11:g.32338721G>T	NM_000059.4:c.4366G>T	E1456*	pathogenic
13	32363485	TC	T	BRCA2	NC_000013.11:g.32363487del	NM_000059.4:c.8285del	P2762Lfs*15	pathogenic
13	32368799	T	G	BRCA2	NC_000013.11:g.32368799T>G	NM_000059.4:c.8332-1603T>G	?	benign
13	32339054	C	T	BRCA2	NC_000013.11:g.32339054C>T	NM_000059.4:c.4699C>T	L1567=	likely_benign
13	32341117	T	TA	BRCA2	NC_000013.11:g.32341118dup	NM_000059.4:c.6763dup	T2255Nfs*6	pathogenic
13	32391173	G	A	BRCA2	NC_000013.11:g.32391173G>A	NM_000059.4:c.9257-3516G>A	?	benign
13	32337184	T	TA	BRCA2	NC_000013.11:g.32337190dup	NM_000059.4:c.2835dup	D946Rfs*13	pathogenic
13	32388121	C	CT	BRCA2	NC_000013.11:g.32388136dup	NM_000059.4:c.9257-6553dup	?	benign
13	32357750	G	GT	BRCA2	NC_000013.11:g.32357751dup	NM_000059.4:c.7627dup	Y2543Lfs*5	pathogenic
13	32325765	T	C	BRCA2	NC_000013.11:g.32325765T>C	NM_000059.4:c.426-336T>C	?	benign
13	32338640	C	CT	BRCA2	NC_000013.11:g.32338640_32338641insT	NM_000059.4:c.4285_4286insT	Q1429Lfs*9	pathogenic
13	32340367	A	G	BRCA2	NC_000013.11:g.32340367A>G	NM_000059.4:c.6012A>G	E2004=	likely_benign
13	32355283	C	CT	BRCA2	NC_000013.11:g.32355286dup	NM_000059.4:c.7433dup	L2478Ffs*19	pathogenic
13	32332428	CA	C	BRCA2	NC_000013.11:g.32332434del	NM_000059.4:c.956del	N319Ifs*5	pathogenic
13	32340340	C	T	BRCA2	NC_000013.11:g.32340340C>T	NM_000059.4:c.5985C>T	N1995=	likely_benign
13	32340686	AAG	A	BRCA2	NC_000013.11:g.32340690_32340691del	NM_000059.4:c.6335_6336del	R2112Kfs*16	pathogenic
13	32357492	G	A	BRCA2	NC_000013.11:g.32357492G>A	NM_000059.4:c.7618-250G>A	?	benign
13	32336678	TC	T	BRCA2	NC_000013.11:g.32336680del	NM_000059.4:c.2325del	K776Rfs*7	pathogenic
13	32332846	G	A	BRCA2	NC_000013.11:g.32332846G>A	NM_000059.4:c.1368G>A	E456=	benign
13	32339152	T	C	BRCA2	NC_000013.11:g.32339152T>C	NM_000059.4:c.4797T>C	N1599=	likely_benign
13	32325687	C	T	BRCA2	NC_000013.11:g.32325687C>T	NM_000059.4:c.426-414C>T	?	benign
13	32338681	A	G	BRCA2	NC_000013.11:g.32338681A>G	NM_000059.4:c.4326A>G	S1442=	likely_benign
13	32379774	C	G	BRCA2	NC_000013.11:g.32379774C>G	NM_000059.4:c.8978C>G	S2993*	pathogenic
13	32357796	GA	G	BRCA2	NC_000013.11:g.32357797del	NM_000059.4:c.7673del	E2558Gfs*90	pathogenic
13	32340142	T	C	BRCA2	NC_000013.11:g.32340142T>C	NM_000059.4:c.5787T>C	I1929=	likely_benign
13	32337637	GC	G	BRCA2	NC_000013.11:g.32337638del	NM_000059.4:c.3283del	Q1095Rfs*9	pathogenic
13	32360774	G	A	BRCA2	NC_000013.11:g.32360774G>A	NM_000059.4:c.7806-1749G>A	?	benign
13	32339932	T	TA	BRCA2	NC_000013.11:g.32339938dup	NM_000059.4:c.5583dup	V1862Sfs*11	pathogenic
13	32384860	G	A	BRCA2	NC_000013.11:g.32384860G>A	NM_000059.4:c.9256+4715G>A	?	benign
13	32332849	G	A	BRCA2	NC_000013.11:g.32332849G>A	NM_000059.4:c.1371G>A	K457=	likely_benign
13	32332581	C	G	BRCA2	NC_000013.11:g.32332581C>G	NM_000059.4:c.1103C>G	S368*	pathogenic
13	32357884	T	TCATAC	BRCA2	NC_000013.11:g.32357886_32357890dup	NM_000059.4:c.7762_7766dup	S2590Yfs*60	pathogenic
13	32398342	C	T	BRCA2	NC_000013.11:g.32398342C>T	NM_000059.4:c.9829C>T	L3277=	likely_benign
13	32323861	A	T	BRCA2	NC_000013.11:g.32323861A>T	NM_000059.4:c.317-1215A>T	?	benign
13	32339006	C	T	BRCA2	NC_000013.11:g.32339006C>T	NM_000059.4:c.4651C>T	Q1551*	pathogenic
13	32329480	T	TGATA	BRCA2	NC_000013.11:g.32329481_32329484dup	NM_000059.4:c.670_673dup	T225Rfs*5	pathogenic
13	32338356	T	A	BRCA2	NC_000013.11:g.32338356T>A	NM_000059.4:c.4001T>A	L1334*	pathogenic
13	32379771	CATCATCAGATTTAT	C	BRCA2	NC_000013.11:g.32379774_32379787del	NM_000059.4:c.8978_8991del	S2993Ffs*20	pathogenic
13	32333296	G	A	BRCA2	NC_000013.11:g.32333296G>A	NM_000059.4:c.1818G>A	P606=	likely_benign
13	32394822	A	G	BRCA2	NC_000013.11:g.32394822A>G	NM_000059.4:c.9390A>G	E3130=	likely_benign
13	32340802	TAA	T	BRCA2	NC_000013.11:g.32340804_32340805del	NM_000059.4:c.6449_6450del	K2150Sfs*25	pathogenic
13	32338453	T	TCATC	BRCA2	NC_000013.11:g.32338453_32338454insCATC	NM_000059.4:c.4098_4099insCATC	K1367Hfs*16	pathogenic
13	32332876	TAAGA	T	BRCA2	NC_000013.11:g.32332877_32332880del	NM_000059.4:c.1399_1402del	K467Efs*17	pathogenic
13	32337985	T	C	BRCA2	NC_000013.11:g.32337985T>C	NM_000059.4:c.3630T>C	D1210=	likely_benign
13	32340799	TA	T	BRCA2	NC_000013.11:g.32340800del	NM_000059.4:c.6445del	I2149Lfs*19	pathogenic
13	32379796	A	G	BRCA2	NC_000013.11:g.32379796A>G	NM_000059.4:c.9000A>G	L3000=	likely_benign
13	32332309	T	G	BRCA2	NC_000013.11:g.32332309T>G	NM_000059.4:c.831T>G	N277K	benign
13	32340235	T	C	BRCA2	NC_000013.11:g.32340235T>C	NM_000059.4:c.5880T>C	C1960=	likely_benign
13	32380424	G	A	BRCA2	NC_000013.11:g.32380424G>A	NM_000059.4:c.9256+279G>A	?	benign
13	32330993	C	T	BRCA2	NC_000013.11:g.32330993C>T	NM_000059.4:c.756C>T	D252=	likely_benign
13	32326249	TG	T	BRCA2	NC_000013.11:g.32326252del	NM_000059.4:c.486del	S163Vfs*9	pathogenic
13	32350747	C	T	BRCA2	NC_000013.11:g.32350747C>T	NM_000059.4:c.7007+3851C>T	?	benign
13	32340387	T	TTG	BRCA2	NC_000013.11:g.32340388_32340389insGT	NM_000059.4:c.6033_6034insGT	S2012Vfs*29	pathogenic
13	32332696	C	G	BRCA2	NC_000013.11:g.32332696C>G	NM_000059.4:c.1218C>G	A406=	likely_benign
13	32355035	A	G	BRCA2	NC_000013.11:g.32355035A>G	NM_000059.4:c.7182A>G	R2394=	likely_benign
13	32363404	TC	T	BRCA2	NC_000013.11:g.32363408del	NM_000059.4:c.8206del	L2736Sfs*2	pathogenic
13	32336719	C	T	BRCA2	NC_000013.11:g.32336719C>T	NM_000059.4:c.2364C>T	G788=	likely_benign
13	32394726	C	A	BRCA2	NC_000013.11:g.32394726C>A	NM_000059.4:c.9294C>A	Y3098*	pathogenic
13	32333227	G	A	BRCA2	NC_000013.11:g.32333227G>A	NM_000059.4:c.1749G>A	L583=	likely_benign
13	32370955	G	A	BRCA2	NC_000013.11:g.32370955G>A	NM_000059.4:c.8488-1G>A	?	pathogenic
13	32330989	CAG	C	BRCA2	NC_000013.11:g.32330991_32330992del	NM_000059.4:c.754_755del	D252Qfs*2	pathogenic
13	32371052	C	T	BRCA2	NC_000013.11:g.32371052C>T	NM_000059.4:c.8584C>T	L2862=	likely_benign
13	32337005	TCAGA	T	BRCA2	NC_000013.11:g.32337008_32337011del	NM_000059.4:c.2653_2656del	D885Mfs*9	pathogenic
13	32362593	TG	T	BRCA2	NC_000013.11:g.32362595del	NM_000059.4:c.7878del	W2626*	pathogenic
13	32380559	G	A	BRCA2	NC_000013.11:g.32380559G>A	NM_000059.4:c.9256+414G>A	?	benign
13	32346866	CT	C	BRCA2	NC_000013.11:g.32346869del	NM_000059.4:c.6980del	L2327*	pathogenic
13	32363177	AGATAT	A	BRCA2	NC_000013.11:g.32363182_32363186del	NM_000059.4:c.7980_7984del	D2661Gfs*3	pathogenic
13	32340745	TA	T	BRCA2	NC_000013.11:g.32340748del	NM_000059.4:c.6393del	K2131Nfs*6	pathogenic
13	32356513	A	G	BRCA2	NC_000013.11:g.32356513A>G	NM_000059.4:c.7521A>G	P2507=	benign
13	32336272	G	A	BRCA2	NC_000013.11:g.32336272G>A	NM_000059.4:c.1917G>A	L639=	likely_benign
13	32358687	C	G	BRCA2	NC_000013.11:g.32358687C>G	NM_000059.4:c.7805+758C>G	?	benign
13	32340999	ACTCC	A	BRCA2	NC_000013.11:g.32341000_32341003del	NM_000059.4:c.6645_6648del	Y2215*	pathogenic
13	32363409	T	TAG	BRCA2	NC_000013.11:g.32363409_32363410insAG	NM_000059.4:c.8207_8208insAG	L2737Afs*2	pathogenic
13	32341191	TA	CTTTGTGGTAAGTTT	BRCA2	NC_000013.11:g.32341191_32341192delinsCTTTGTGGTAAGTTT	NM_000059.4:c.6836_6837delinsCTTTGTGGTAAGTTT	L2279Sfs*4	pathogenic
13	32370464	TA	T	BRCA2	NC_000013.11:g.32370465del	NM_000059.4:c.8395del	R2799Dfs*22	pathogenic
13	32340760	CTTAAATG	C	BRCA2	NC_000013.11:g.32340763_32340769del	NM_000059.4:c.6408_6414del	N2137Kfs*29	pathogenic
13	32338625	TC	T	BRCA2	NC_000013.11:g.32338626del	NM_000059.4:c.4271del	S1424Lfs*24	pathogenic
13	32339846	A	AT	BRCA2	NC_000013.11:g.32339847dup	NM_000059.4:c.5492dup	S1832Ifs*2	pathogenic
13	32337012	ATG	A	BRCA2	NC_000013.11:g.32337013_32337014del	NM_000059.4:c.2658_2659del	N886Kfs*3	pathogenic
13	32379326	A	G	BRCA2	NC_000013.11:g.32379326A>G	NM_000059.4:c.8764A>G	S2922G	benign
13	32354877	CA	C	BRCA2	NC_000013.11:g.32354879del	NM_000059.4:c.7026del	E2343Rfs*24	pathogenic
13	32340432	CAA	C	BRCA2	NC_000013.11:g.32340433_32340434del	NM_000059.4:c.6078_6079del	E2028Rfs*20	pathogenic
13	32376679	CAA	C	BRCA2	NC_000013.11:g.32376682_32376683del	NM_000059.4:c.8645_8646del	K2882Tfs*24	pathogenic
13	32332404	C	G	BRCA2	NC_000013.11:g.32332404C>G	NM_000059.4:c.926C>G	S309*	pathogenic
13	32340510	C	A	BRCA2	NC_000013.11:g.32340510C>A	NM_000059.4:c.6155C>A	S2052*	pathogenic
13	32336389	TA	T	BRCA2	NC_000013.11:g.32336391del	NM_000059.4:c.2036del	N679Ifs*3	pathogenic
13	32341070	G	T	BRCA2	NC_000013.11:g.32341070G>T	NM_000059.4:c.6715G>T	E2239*	pathogenic
13	32340453	TA	T	BRCA2	NC_000013.11:g.32340454del	NM_000059.4:c.6099del	R2034Vfs*6	pathogenic
13	32338066	T	C	BRCA2	NC_000013.11:g.32338066T>C	NM_000059.4:c.3711T>C	A1237=	likely_benign
13	32338783	CA	C	BRCA2	NC_000013.11:g.32338784del	NM_000059.4:c.4429del	I1477Ffs*2	pathogenic
13	32339394	CTG	C	BRCA2	NC_000013.11:g.32339397_32339398del	NM_000059.4:c.5042_5043del	V1681Efs*7	pathogenic
13	32340594	T	TA	BRCA2	NC_000013.11:g.32340595dup	NM_000059.4:c.6240dup	E2081Rfs*4	pathogenic
13	32398212	T	C	BRCA2	NC_000013.11:g.32398212T>C	NM_000059.4:c.9699T>C	C3233=	likely_benign
13	32336936	C	CA	BRCA2	NC_000013.11:g.32336943dup	NM_000059.4:c.2588dup	N863Kfs*18	pathogenic
13	32325741	C	T	BRCA2	NC_000013.11:g.32325741C>T	NM_000059.4:c.426-360C>T	?	benign
13	32332603	CT	C	BRCA2	NC_000013.11:g.32332606del	NM_000059.4:c.1128del	F376Lfs*23	pathogenic
13	32326148	C	A	BRCA2	NC_000013.11:g.32326148C>A	NM_000059.4:c.473C>A	S158*	pathogenic
13	32379859	A	G	BRCA2	NC_000013.11:g.32379859A>G	NM_000059.4:c.9063A>G	E3021=	likely_benign
13	32340551	GTT	G	BRCA2	NC_000013.11:g.32340553_32340554del	NM_000059.4:c.6198_6199del	S2067Hfs*10	pathogenic
13	32341036	A	AG	BRCA2	NC_000013.11:g.32341037dup	NM_000059.4:c.6682dup	V2228Gfs*5	pathogenic
13	32333290	A	AC	BRCA2	NC_000013.11:g.32333290_32333291insC	NM_000059.4:c.1812_1813insC	I605Hfs*11	pathogenic
13	32339473	TACTG	T	BRCA2	NC_000013.11:g.32339474_32339477del	NM_000059.4:c.5119_5122del	T1707Qfs*4	pathogenic
13	32340798	CTA	C	BRCA2	NC_000013.11:g.32340800_32340801del	NM_000059.4:c.6445_6446del	I2149*	pathogenic
13	32340844	A	G	BRCA2	NC_000013.11:g.32340844A>G	NM_000059.4:c.6489A>G	Q2163=	likely_benign
13	32379895	T	TC	BRCA2	NC_000013.11:g.32379896dup	NM_000059.4:c.9100dup	Q3034Pfs*10	pathogenic
13	32339028	GT	G	BRCA2	NC_000013.11:g.32339032del	NM_000059.4:c.4677del	F1559Lfs*9	pathogenic
13	32339661	AT	A	BRCA2	NC_000013.11:g.32339663del	NM_000059.4:c.5308del	S1770Lfs*7	pathogenic
13	32338288	AAATTACAAGAGAAATACTG	A	BRCA2	NC_000013.11:g.32338291_32338309del	NM_000059.4:c.3936_3954del	N1312Kfs*17	pathogenic
13	32340820	C	T	BRCA2	NC_000013.11:g.32340820C>T	NM_000059.4:c.6465C>T	L2155=	likely_benign
13	32329463	G	T	BRCA2	NC_000013.11:g.32329463G>T	NM_000059.4:c.652G>T	E218*	pathogenic
13	32326570	T	C	BRCA2	NC_000013.11:g.32326570T>C	NM_000059.4:c.588T>C	S196=	likely_benign
13	32333329	A	G	BRCA2	NC_000013.11:g.32333329A>G	NM_000059.4:c.1851A>G	S617=	likely_benign
13	32339851	TA	T	BRCA2	NC_000013.11:g.32339853del	NM_000059.4:c.5498del	N1833Ifs*7	pathogenic
13	32346834	AAAAG	A	BRCA2	NC_000013.11:g.32346836_32346839del	NM_000059.4:c.6947_6950del	K2316Ifs*11	pathogenic
13	32376712	GA	G	BRCA2	NC_000013.11:g.32376713del	NM_000059.4:c.8676del	R2892Sfs*17	pathogenic
13	32346886	G	GT	BRCA2	NC_000013.11:g.32346887dup	NM_000059.4:c.6998dup	P2334Tfs*6	pathogenic
13	32339636	G	T	BRCA2	NC_000013.11:g.32339636G>T	NM_000059.4:c.5281G>T	G1761*	pathogenic
13	32341131	ATG	A	BRCA2	NC_000013.11:g.32341132_32341133del	NM_000059.4:c.6777_6778del	N2259Kfs*33	pathogenic
13	32338885	C	T	BRCA2	NC_000013.11:g.32338885C>T	NM_000059.4:c.4530C>T	P1510=	likely_benign
13	32338668	TC	T	BRCA2	NC_000013.11:g.32338669del	NM_000059.4:c.4314del	A1439Pfs*9	pathogenic
13	32340760	CTTAAA	C	BRCA2	NC_000013.11:g.32340762_32340766del	NM_000059.4:c.6407_6411del	L2136Cfs*2	pathogenic
13	32332861	G	A	BRCA2	NC_000013.11:g.32332861G>A	NM_000059.4:c.1383G>A	E461=	likely_benign
13	32333315	CTAAT	C	BRCA2	NC_000013.11:g.32333319_32333322del	NM_000059.4:c.1841_1844del	I614Tfs*29	pathogenic
13	32380064	A	G	BRCA2	NC_000013.11:g.32380064A>G	NM_000059.4:c.9175A>G	K3059E	benign
13	32333382	ATTCAG	A	BRCA2	NC_000013.11:g.32333383_32333387del	NM_000059.4:c.1905_1909del	D635Efs*15	pathogenic
13	32340256	G	A	BRCA2	NC_000013.11:g.32340256G>A	NM_000059.4:c.5901G>A	K1967=	likely_benign
13	32340446	AC	A	BRCA2	NC_000013.11:g.32340447del	NM_000059.4:c.6092del	T2031Mfs*9	pathogenic
13	32355268	A	C	BRCA2	NC_000013.11:g.32355268A>C	NM_000059.4:c.7415A>C	K2472T	benign
13	32319259	C	T	BRCA2	NC_000013.11:g.32319259C>T	NM_000059.4:c.250C>T	Q84*	pathogenic
13	32338293	AC	A	BRCA2	NC_000013.11:g.32338294del	NM_000059.4:c.3939del	Y1313*	pathogenic
13	32390265	G	T	BRCA2	NC_000013.11:g.32390265G>T	NM_000059.4:c.9257-4424G>T	?	benign
13	32370993	G	A	BRCA2	NC_000013.11:g.32370993G>A	NM_000059.4:c.8525G>A	R2842H	benign
13	32394707	AT	A	BRCA2	NC_000013.11:g.32394710del	NM_000059.4:c.9278del	L3093Cfs*11	pathogenic
13	32367008	A	G	BRCA2	NC_000013.11:g.32367008A>G	NM_000059.4:c.8332-3394A>G	?	benign
13	32338916	C	T	BRCA2	NC_000013.11:g.32338916C>T	NM_000059.4:c.4561C>T	L1521=	likely_benign
13	32320840	C	T	BRCA2	NC_000013.11:g.32320840C>T	NM_000059.4:c.316+1515C>T	?	benign
13	32340392	A	T	BRCA2	NC_000013.11:g.32340392A>T	NM_000059.4:c.6037A>T	K2013*	pathogenic
13	32396886	T	G	BRCA2	NC_000013.11:g.32396886T>G	NM_000059.4:c.9502-12T>G	?	benign
13	32362573	G	A	BRCA2	NC_000013.11:g.32362573G>A	NM_000059.4:c.7856G>A	W2619*	pathogenic
13	32363272	TTC	T	BRCA2	NC_000013.11:g.32363274_32363275del	NM_000059.4:c.8072_8073del	S2691*	pathogenic
13	32339516	A	AACAGT	BRCA2	NC_000013.11:g.32339519_32339523dup	NM_000059.4:c.5164_5168dup	I1724Vfs*3	pathogenic
13	32333382	AT	A	BRCA2	NC_000013.11:g.32333384del	NM_000059.4:c.1906del	S636Qfs*8	pathogenic
13	32340300	GTGGA	G	BRCA2	NC_000013.11:g.32340301_32340304del	NM_000059.4:c.5946_5949del	S1982Rfs*21	pathogenic
13	32340980	ATAGAAGTT	A	BRCA2	NC_000013.11:g.32340982_32340989del	NM_000059.4:c.6627_6634del	I2209Mfs*13	pathogenic
13	32333478	ATATCT	A	BRCA2	NC_000013.11:g.32333482_32333486del	NM_000059.4:c.1909+95_1909+99del	?	benign
13	32363207	AGATCGGCTATAAAAAAGATAATG	A	BRCA2	NC_000013.11:g.32363210_32363232del	NM_000059.4:c.8008_8030del	S2670Kfs*3	pathogenic
13	32357881	G	A	BRCA2	NC_000013.11:g.32357881G>A	NM_000059.4:c.7757G>A	W2586*	pathogenic
13	32339774	GAT	G	BRCA2	NC_000013.11:g.32339777_32339778del	NM_000059.4:c.5422_5423del	I1808Lfs*3	pathogenic
13	32332770	CAG	C	BRCA2	NC_000013.11:g.32332774_32332775del	NM_000059.4:c.1296_1297del	N433Qfs*18	pathogenic
13	32354968	C	A	BRCA2	NC_000013.11:g.32354968C>A	NM_000059.4:c.7115C>A	S2372*	pathogenic
13	32319307	A	T	BRCA2	NC_000013.11:g.32319307A>T	NM_000059.4:c.298A>T	K100*	pathogenic
13	32340526	AT	A	BRCA2	NC_000013.11:g.32340529del	NM_000059.4:c.6174del	F2058Lfs*12	pathogenic
13	32332387	T	G	BRCA2	NC_000013.11:g.32332387T>G	NM_000059.4:c.909T>G	S303=	likely_benign
13	32333034	GTT	G	BRCA2	NC_000013.11:g.32333038_32333039del	NM_000059.4:c.1560_1561del	S521Rfs*5	pathogenic
13	32346830	CAATA	C	BRCA2	NC_000013.11:g.32346833_32346836del	NM_000059.4:c.6944_6947del	I2315Kfs*12	pathogenic
13	32316490	A	G	BRCA2	NC_000013.11:g.32316490A>G	NM_000059.4:c.30A>G	T10=	likely_benign
13	32380096	T	C	BRCA2	NC_000013.11:g.32380096T>C	NM_000059.4:c.9207T>C	C3069=	likely_benign
13	32352807	A	G	BRCA2	NC_000013.11:g.32352807A>G	NM_000059.4:c.7008-2054A>G	?	benign
13	32339571	ATTTAAGT	A	BRCA2	NC_000013.11:g.32339572_32339578del	NM_000059.4:c.5217_5223del	Y1739*	pathogenic
13	32333322	ACT	A	BRCA2	NC_000013.11:g.32333323_32333324del	NM_000059.4:c.1845_1846del	N615Kfs*6	pathogenic
13	32338131	GTT	G	BRCA2	NC_000013.11:g.32338133_32338134del	NM_000059.4:c.3778_3779del	L1260Ifs*4	pathogenic
13	32341011	CAGAA	C	BRCA2	NC_000013.11:g.32341013_32341016del	NM_000059.4:c.6658_6661del	E2220Tfs*8	pathogenic
13	32340072	ACT	A	BRCA2	NC_000013.11:g.32340077_32340078del	NM_000059.4:c.5722_5723del	L1908Rfs*2	pathogenic
13	32398443	A	C	BRCA2	NC_000013.11:g.32398443A>C	NM_000059.4:c.9930A>C	T3310=	likely_benign
13	32341084	TA	T	BRCA2	NC_000013.11:g.32341087del	NM_000059.4:c.6732del	K2244Nfs*36	pathogenic
13	32355160	AC	A	BRCA2	NC_000013.11:g.32355161del	NM_000059.4:c.7308del	N2436Kfs*31	pathogenic
13	32339338	T	G	BRCA2	NC_000013.11:g.32339338T>G	NM_000059.4:c.4983T>G	Y1661*	pathogenic
13	32396296	G	A	BRCA2	NC_000013.11:g.32396296G>A	NM_000059.4:c.9502-602G>A	?	benign
13	32394814	C	CG	BRCA2	NC_000013.11:g.32394815dup	NM_000059.4:c.9383dup	P3129Tfs*21	pathogenic
13	32394812	G	A	BRCA2	NC_000013.11:g.32394812G>A	NM_000059.4:c.9380G>A	W3127*	pathogenic
13	32338918	A	C	BRCA2	NC_000013.11:g.32338918A>C	NM_000059.4:c.4563A>C	L1521=	likely_benign
13	32376683	AC	A	BRCA2	NC_000013.11:g.32376685del	NM_000059.4:c.8648del	P2883Hfs*8	pathogenic
13	32332671	TA	T	BRCA2	NC_000013.11:g.32332673del	NM_000059.4:c.1195del	T399Pfs*5	pathogenic
13	32340659	G	GT	BRCA2	NC_000013.11:g.32340660dup	NM_000059.4:c.6305dup	S2103Ifs*8	pathogenic
13	32332287	C	G	BRCA2	NC_000013.11:g.32332287C>G	NM_000059.4:c.809C>G	S270*	pathogenic
13	32332534	C	T	BRCA2	NC_000013.11:g.32332534C>T	NM_000059.4:c.1056C>T	Y352=	likely_benign
13	32337253	T	C	BRCA2	NC_000013.11:g.32337253T>C	NM_000059.4:c.2898T>C	T966=	likely_benign
13	32354958	GAA	G	BRCA2	NC_000013.11:g.32354962_32354963del	NM_000059.4:c.7109_7110del	K2370Ifs*21	pathogenic
13	32339523	C	CTA	BRCA2	NC_000013.11:g.32339526_32339527dup	NM_000059.4:c.5171_5172dup	A1725*	pathogenic
13	32332557	CA	C	BRCA2	NC_000013.11:g.32332560del	NM_000059.4:c.1082del	N361Mfs*6	pathogenic
13	32336731	C	G	BRCA2	NC_000013.11:g.32336731C>G	NM_000059.4:c.2376C>G	Y792*	pathogenic
13	32357794	CA	C	BRCA2	NC_000013.11:g.32357795del	NM_000059.4:c.7671del	E2558Sfs*90	pathogenic
13	32336452	G	A	BRCA2	NC_000013.11:g.32336452G>A	NM_000059.4:c.2097G>A	Q699=	likely_benign
13	32362521	A	G	BRCA2	NC_000013.11:g.32362521A>G	NM_000059.4:c.7806-2A>G	?	pathogenic
13	32332981	CA	C	BRCA2	NC_000013.11:g.32332986del	NM_000059.4:c.1508del	K503Sfs*6	pathogenic
13	32340404	A	T	BRCA2	NC_000013.11:g.32340404A>T	NM_000059.4:c.6049A>T	K2017*	pathogenic
13	32339062	CAG	C	BRCA2	NC_000013.11:g.32339067_32339068del	NM_000059.4:c.4712_4713del	E1571Gfs*3	pathogenic
13	32346184	G	GT	BRCA2	NC_000013.11:g.32346193dup	NM_000059.4:c.6938-634dup	?	benign
13	32339667	G	A	BRCA2	NC_000013.11:g.32339667G>A	NM_000059.4:c.5312G>A	G1771D	benign
13	32339939	GTGAA	G	BRCA2	NC_000013.11:g.32339940_32339943del	NM_000059.4:c.5585_5588del	V1862Efs*11	pathogenic
13	32316510	C	CA	BRCA2	NC_000013.11:g.32316511dup	NM_000059.4:c.51dup	R18Tfs*13	pathogenic
13	32336530	A	G	BRCA2	NC_000013.11:g.32336530A>G	NM_000059.4:c.2175A>G	K725=	likely_benign
13	32326555	T	TA	BRCA2	NC_000013.11:g.32326556dup	NM_000059.4:c.574dup	M192Nfs*14	pathogenic
13	32363268	GT	G	BRCA2	NC_000013.11:g.32363269del	NM_000059.4:c.8067del	C2689Wfs*5	pathogenic
13	32338907	G	T	BRCA2	NC_000013.11:g.32338907G>T	NM_000059.4:c.4552G>T	E1518*	pathogenic
13	32386851	A	G	BRCA2	NC_000013.11:g.32386851A>G	NM_000059.4:c.9256+6706A>G	?	benign
13	32338946	AAAGTT	A	BRCA2	NC_000013.11:g.32338949_32338953del	NM_000059.4:c.4594_4598del	V1532Nfs*14	pathogenic
13	32380082	T	TA	BRCA2	NC_000013.11:g.32380082_32380083insA	NM_000059.4:c.9193_9194insA	F3065Yfs*7	pathogenic
13	32356586	C	CTT	BRCA2	NC_000013.11:g.32356586_32356587insTT	NM_000059.4:c.7594_7595insTT	P2532Lfs*20	pathogenic
13	32379472	GA	G	BRCA2	NC_000013.11:g.32379474del	NM_000059.4:c.8912del	K2971Sfs*5	pathogenic
13	32339291	G	GA	BRCA2	NC_000013.11:g.32339294dup	NM_000059.4:c.4939dup	T1647Nfs*19	pathogenic
13	32338942	GA	G	BRCA2	NC_000013.11:g.32338948del	NM_000059.4:c.4593del	V1532Lfs*11	pathogenic
13	32379901	T	G	BRCA2	NC_000013.11:g.32379901T>G	NM_000059.4:c.9105T>G	Y3035*	pathogenic
13	32319135	TAA	T	BRCA2	NC_000013.11:g.32319136_32319137del	NM_000059.4:c.127_128del	N43Ffs*2	pathogenic
13	32339385	GA	G	BRCA2	NC_000013.11:g.32339390del	NM_000059.4:c.5035del	T1679Lfs*3	pathogenic
13	32394708	TTTGTCAGACGA	T	BRCA2	NC_000013.11:g.32394709_32394719del	NM_000059.4:c.9277_9287del	L3093Mfs*14	pathogenic
13	32333238	CAAATA	C	BRCA2	NC_000013.11:g.32333240_32333244del	NM_000059.4:c.1762_1766del	N588Vfs*7	pathogenic
13	32340977	AAT	A	BRCA2	NC_000013.11:g.32340981_32340982del	NM_000059.4:c.6626_6627del	I2209Rfs*15	pathogenic
13	32326595	AG	A	BRCA2	NC_000013.11:g.32326596del	NM_000059.4:c.614del	S205Ifs*6	pathogenic
13	32332428	C	CA	BRCA2	NC_000013.11:g.32332434dup	NM_000059.4:c.956dup	N319Kfs*8	pathogenic
13	32340323	GA	G	BRCA2	NC_000013.11:g.32340324del	NM_000059.4:c.5969del	D1990Vfs*14	pathogenic
13	32394546	T	A	BRCA2	NC_000013.11:g.32394546T>A	NM_000059.4:c.9257-143T>A	?	benign
13	32357845	G	A	BRCA2	NC_000013.11:g.32357845G>A	NM_000059.4:c.7721G>A	W2574*	pathogenic
13	32346877	A	AT	BRCA2	NC_000013.11:g.32346879dup	NM_000059.4:c.6990dup	T2331Yfs*9	pathogenic
13	32336764	T	C	BRCA2	NC_000013.11:g.32336764T>C	NM_000059.4:c.2409T>C	Y803=	likely_benign
13	32383177	G	A	BRCA2	NC_000013.11:g.32383177G>A	NM_000059.4:c.9256+3032G>A	?	benign
13	32337582	TAG	T	BRCA2	NC_000013.11:g.32337583_32337584del	NM_000059.4:c.3228_3229del	V1077Cfs*3	pathogenic
13	32337553	TA	T	BRCA2	NC_000013.11:g.32337554del	NM_000059.4:c.3199del	T1067Lfs*10	pathogenic
13	32332788	AAGAT	A	BRCA2	NC_000013.11:g.32332789_32332792del	NM_000059.4:c.1311_1314del	K437Nfs*22	pathogenic
13	32340252	AT	A	BRCA2	NC_000013.11:g.32340253del	NM_000059.4:c.5898del	H1966Qfs*38	pathogenic
13	32380066	A	G	BRCA2	NC_000013.11:g.32380066A>G	NM_000059.4:c.9177A>G	K3059=	likely_benign
13	32337238	G	A	BRCA2	NC_000013.11:g.32337238G>A	NM_000059.4:c.2883G>A	Q961=	benign
13	32380081	CTT	C	BRCA2	NC_000013.11:g.32380083_32380084del	NM_000059.4:c.9194_9195del	F3065Sfs*6	pathogenic
13	32338220	AAATG	A	BRCA2	NC_000013.11:g.32338221_32338224del	NM_000059.4:c.3866_3869del	K1289Tfs*3	pathogenic
13	32337148	A	G	BRCA2	NC_000013.11:g.32337148A>G	NM_000059.4:c.2793A>G	G931=	likely_benign
13	32338167	C	G	BRCA2	NC_000013.11:g.32338167C>G	NM_000059.4:c.3812C>G	S1271*	pathogenic
13	32318738	G	A	BRCA2	NC_000013.11:g.32318738G>A	NM_000059.4:c.68-339G>A	?	benign
13	32394897	TC	T	BRCA2	NC_000013.11:g.32394898del	NM_000059.4:c.9466del	Q3156Kfs*7	pathogenic
13	32332879	G	A	BRCA2	NC_000013.11:g.32332879G>A	NM_000059.4:c.1401G>A	K467=	likely_benign
13	32319087	A	G	BRCA2	NC_000013.11:g.32319087A>G	NM_000059.4:c.78A>G	P26=	likely_benign
13	32336731	C	CA	BRCA2	NC_000013.11:g.32336735dup	NM_000059.4:c.2380dup	M794Nfs*8	pathogenic
13	32336839	T	C	BRCA2	NC_000013.11:g.32336839T>C	NM_000059.4:c.2484T>C	Y828=	likely_benign
13	32336801	GA	G	BRCA2	NC_000013.11:g.32336805del	NM_000059.4:c.2450del	K817Rfs*8	pathogenic
13	32362574	G	A	BRCA2	NC_000013.11:g.32362574G>A	NM_000059.4:c.7857G>A	W2619*	pathogenic
13	32342270	CAA	C	BRCA2	NC_000013.11:g.32342287_32342288del	NM_000059.4:c.6841+1091_6841+1092del	?	benign
13	32337775	T	C	BRCA2	NC_000013.11:g.32337775T>C	NM_000059.4:c.3420T>C	S1140=	benign
13	32315545	G	A	BRCA2	NC_000013.11:g.32315545G>A	NM_000059.4:c.-162G>A	?	benign
13	32372278	C	T	BRCA2	NC_000013.11:g.32372278C>T	NM_000059.4:c.8632+1178C>T	?	benign
13	32337185	A	T	BRCA2	NC_000013.11:g.32337185A>T	NM_000059.4:c.2830A>T	K944*	pathogenic
13	32332465	GA	G	BRCA2	NC_000013.11:g.32332472del	NM_000059.4:c.994del	I332Ffs*17	pathogenic
13	32370431	CTG	C	BRCA2	NC_000013.11:g.32370432_32370433del	NM_000059.4:c.8362_8363del	W2788Vfs*9	pathogenic
13	32362626	GCCTTT	G	BRCA2	NC_000013.11:g.32362630_32362634del	NM_000059.4:c.7913_7917del	F2638*	pathogenic
13	32347011	T	TTTTATAAAA	BRCA2	NC_000013.11:g.32347022_32347030dup	NM_000059.4:c.7007+126_7007+134dup	-	benign
13	32340037	C	A	BRCA2	NC_000013.11:g.32340037C>A	NM_000059.4:c.5682C>A	Y1894*	pathogenic
13	32379816	GAATTTATCATCTTGCAACTTCAA	G	BRCA2	NC_000013.11:g.32379820_32379842del	NM_000059.4:c.9024_9046del	Y3009*	pathogenic
13	32341836	C	G	BRCA2	NC_000013.11:g.32341836C>G	NM_000059.4:c.6841+640C>G	?	benign
13	32338048	T	C	BRCA2	NC_000013.11:g.32338048T>C	NM_000059.4:c.3693T>C	T1231=	likely_benign
13	32340992	TC	T	BRCA2	NC_000013.11:g.32340993del	NM_000059.4:c.6638del	S2213Lfs*16	pathogenic
13	32396936	TATGCATATACTGCA	T	BRCA2	NC_000013.11:g.32396937_32396950del	NM_000059.4:c.9541_9554del	M3181Cfs*3	pathogenic
13	32379755	CTGAG	C	BRCA2	NC_000013.11:g.32379757_32379760del	NM_000059.4:c.8961_8964del	S2988Ffs*12	pathogenic
13	32331022	C	CA	BRCA2	NC_000013.11:g.32331024dup	NM_000059.4:c.787dup	S263Kfs*13	pathogenic
13	32363342	CA	C	BRCA2	NC_000013.11:g.32363347del	NM_000059.4:c.8145del	V2716Wfs*17	pathogenic
13	32332382	AC	A	BRCA2	NC_000013.11:g.32332384del	NM_000059.4:c.906del	S303Lfs*21	pathogenic
13	32341108	TTC	T	BRCA2	NC_000013.11:g.32341112_32341113del	NM_000059.4:c.6757_6758del	L2253Ffs*7	pathogenic
13	32336890	T	G	BRCA2	NC_000013.11:g.32336890T>G	NM_000059.4:c.2535T>G	P845=	likely_benign
13	32399612	A	G	BRCA2	NC_000013.11:g.32399612A>G	NM_000059.4:c.*842A>G	?	benign
13	32333365	T	TA	BRCA2	NC_000013.11:g.32333366dup	NM_000059.4:c.1888dup	T630Nfs*6	pathogenic
13	32354920	TTC	T	BRCA2	NC_000013.11:g.32354922_32354923del	NM_000059.4:c.7069_7070del	L2357Vfs*2	pathogenic
13	32338811	GT	G	BRCA2	NC_000013.11:g.32338813del	NM_000059.4:c.4458del	K1487Nfs*5	pathogenic
13	32394862	TC	T	BRCA2	NC_000013.11:g.32394863del	NM_000059.4:c.9431del	S3144Lfs*19	pathogenic
13	32337638	C	T	BRCA2	NC_000013.11:g.32337638C>T	NM_000059.4:c.3283C>T	Q1095*	pathogenic
13	32332501	T	A	BRCA2	NC_000013.11:g.32332501T>A	NM_000059.4:c.1023T>A	C341*	pathogenic
13	32339943	AAG	A	BRCA2	NC_000013.11:g.32339945_32339946del	NM_000059.4:c.5590_5591del	D1864Hfs*8	pathogenic
13	32363187	CG	C	BRCA2	NC_000013.11:g.32363189del	NM_000059.4:c.7987del	E2663Kfs*10	pathogenic
13	32341112	CTT	C	BRCA2	NC_000013.11:g.32341116_32341117del	NM_000059.4:c.6761_6762del	F2254Yfs*6	pathogenic
13	32340760	CTT	C	BRCA2	NC_000013.11:g.32340761_32340762del	NM_000059.4:c.6406_6407del	L2136Kfs*3	pathogenic
13	32338607	ATAA	T	BRCA2	NC_000013.11:g.32338607_32338610delinsT	NM_000059.4:c.4252_4255delinsT	I1418*	pathogenic
13	32370530	A	C	BRCA2	NC_000013.11:g.32370530A>C	NM_000059.4:c.8460A>C	V2820=	benign
13	32368453	T	C	BRCA2	NC_000013.11:g.32368453T>C	NM_000059.4:c.8332-1949T>C	?	benign
13	32394801	C	T	BRCA2	NC_000013.11:g.32394801C>T	NM_000059.4:c.9369C>T	S3123=	likely_benign
13	32340643	T	G	BRCA2	NC_000013.11:g.32340643T>G	NM_000059.4:c.6288T>G	P2096=	likely_benign
13	32362679	TC	T	BRCA2	NC_000013.11:g.32362680del	NM_000059.4:c.7963del	Q2655Nfs*2	pathogenic
13	32338633	A	AT	BRCA2	NC_000013.11:g.32338639dup	NM_000059.4:c.4284dup	Q1429Sfs*9	pathogenic
13	32326112	TA	T	BRCA2	NC_000013.11:g.32326113del	NM_000059.4:c.438del	Q147Nfs*5	pathogenic
13	32363497	T	TAC	BRCA2	NC_000013.11:g.32363500_32363501dup	NM_000059.4:c.8298_8299dup	P2767Hfs*11	pathogenic
13	32338167	C	A	BRCA2	NC_000013.11:g.32338167C>A	NM_000059.4:c.3812C>A	S1271*	pathogenic
13	32340108	A	G	BRCA2	NC_000013.11:g.32340108A>G	NM_000059.4:c.5753A>G	H1918R	benign
13	32380135	G	GA	BRCA2	NC_000013.11:g.32380142dup	NM_000059.4:c.9253dup	T3085Nfs*26	pathogenic
13	32394887	AG	A	BRCA2	NC_000013.11:g.32394890del	NM_000059.4:c.9458del	G3153Afs*10	pathogenic
13	32340870	C	A	BRCA2	NC_000013.11:g.32340870C>A	NM_000059.4:c.6515C>A	S2172*	pathogenic
13	32330937	TC	T	BRCA2	NC_000013.11:g.32330939del	NM_000059.4:c.702del	N235Ifs*6	pathogenic
13	32363453	A	AT	BRCA2	NC_000013.11:g.32363455dup	NM_000059.4:c.8253dup	I2752Yfs*12	pathogenic
13	32337635	A	T	BRCA2	NC_000013.11:g.32337635A>T	NM_000059.4:c.3280A>T	K1094*	pathogenic
13	32338277	G	T	BRCA2	NC_000013.11:g.32338277G>T	NM_000059.4:c.3922G>T	E1308*	pathogenic
13	32339569	T	G	BRCA2	NC_000013.11:g.32339569T>G	NM_000059.4:c.5214T>G	T1738=	likely_benign
13	32378309	G	C	BRCA2	NC_000013.11:g.32378309G>C	NM_000059.4:c.8755-1008G>C	?	benign
13	32344622	A	G	BRCA2	NC_000013.11:g.32344622A>G	NM_000059.4:c.6906A>G	K2302=	likely_benign
13	32379251	T	C	BRCA2	NC_000013.11:g.32379251T>C	NM_000059.4:c.8755-66T>C	?	benign
13	32355227	CA	C	BRCA2	NC_000013.11:g.32355232del	NM_000059.4:c.7379del	N2460Tfs*7	pathogenic
13	32340280	T	A	BRCA2	NC_000013.11:g.32340280T>A	NM_000059.4:c.5925T>A	C1975*	pathogenic
13	32376974	A	C	BRCA2	NC_000013.11:g.32376974A>C	NM_000059.4:c.8754+183A>C	?	benign
13	32344592	A	G	BRCA2	NC_000013.11:g.32344592A>G	NM_000059.4:c.6876A>G	E2292=	likely_benign
13	32340274	T	C	BRCA2	NC_000013.11:g.32340274T>C	NM_000059.4:c.5919T>C	N1973=	likely_benign
13	32379872	C	T	BRCA2	NC_000013.11:g.32379872C>T	NM_000059.4:c.9076C>T	Q3026*	pathogenic
13	32336448	TA	T	BRCA2	NC_000013.11:g.32336449del	NM_000059.4:c.2094del	Q699Sfs*31	pathogenic
13	32354271	G	A	BRCA2	NC_000013.11:g.32354271G>A	NM_000059.4:c.7008-590G>A	?	benign
13	32337871	G	T	BRCA2	NC_000013.11:g.32337871G>T	NM_000059.4:c.3516G>T	S1172=	likely_benign
13	32371231	T	TC	BRCA2	NC_000013.11:g.32371232dup	NM_000059.4:c.8632+132dup	?	benign
13	32339038	T	C	BRCA2	NC_000013.11:g.32339038T>C	NM_000059.4:c.4683T>C	H1561=	likely_benign
13	32355068	C	CT	BRCA2	NC_000013.11:g.32355071dup	NM_000059.4:c.7218dup	V2407Cfs*5	pathogenic
13	32379466	C	T	BRCA2	NC_000013.11:g.32379466C>T	NM_000059.4:c.8904C>T	T2968=	likely_benign
13	32379823	T	G	BRCA2	NC_000013.11:g.32379823T>G	NM_000059.4:c.9027T>G	Y3009*	pathogenic
13	32340321	C	CA	BRCA2	NC_000013.11:g.32340322dup	NM_000059.4:c.5967dup	D1990Rfs*13	pathogenic
13	32355173	TG	T	BRCA2	NC_000013.11:g.32355175del	NM_000059.4:c.7322del	G2441Afs*26	pathogenic
13	32363250	C	CT	BRCA2	NC_000013.11:g.32363250_32363251insT	NM_000059.4:c.8048_8049insT	T2685Nfs*8	pathogenic
13	32339555	G	T	BRCA2	NC_000013.11:g.32339555G>T	NM_000059.4:c.5200G>T	E1734*	pathogenic
13	32338191	AT	A	BRCA2	NC_000013.11:g.32338192del	NM_000059.4:c.3837del	N1279Kfs*5	pathogenic
13	32340884	A	AT	BRCA2	NC_000013.11:g.32340886dup	NM_000059.4:c.6531dup	H2178Sfs*11	pathogenic
13	32319209	G	GGA	BRCA2	NC_000013.11:g.32319210_32319211dup	NM_000059.4:c.201_202dup	K68Rfs*13	pathogenic
13	32363421	T	A	BRCA2	NC_000013.11:g.32363421T>A	NM_000059.4:c.8219T>A	L2740*	pathogenic
13	32338399	T	C	BRCA2	NC_000013.11:g.32338399T>C	NM_000059.4:c.4044T>C	C1348=	likely_benign
13	32371474	C	T	BRCA2	NC_000013.11:g.32371474C>T	NM_000059.4:c.8632+374C>T	?	benign
13	32340558	T	TA	BRCA2	NC_000013.11:g.32340558_32340559insA	NM_000059.4:c.6203_6204insA	L2069Ffs*9	pathogenic
13	32379495	CA	C	BRCA2	NC_000013.11:g.32379502del	NM_000059.4:c.8940del	E2981Kfs*7	pathogenic
13	32337466	A	G	BRCA2	NC_000013.11:g.32337466A>G	NM_000059.4:c.3111A>G	Q1037=	likely_benign
13	32338012	T	C	BRCA2	NC_000013.11:g.32338012T>C	NM_000059.4:c.3657T>C	F1219=	likely_benign
13	32337663	T	G	BRCA2	NC_000013.11:g.32337663T>G	NM_000059.4:c.3308T>G	L1103*	pathogenic
13	32328875	A	AGT	BRCA2	NC_000013.11:g.32328892_32328893dup	NM_000059.4:c.632-551_632-550dup	-	benign
13	32338964	G	A	BRCA2	NC_000013.11:g.32338964G>A	NM_000059.4:c.4609G>A	E1537K	benign
13	32341136	G	T	BRCA2	NC_000013.11:g.32341136G>T	NM_000059.4:c.6781G>T	E2261*	pathogenic
13	32333045	CAT	C	BRCA2	NC_000013.11:g.32333048_32333049del	NM_000059.4:c.1570_1571del	M524Dfs*2	pathogenic
13	32339733	A	ATT	BRCA2	NC_000013.11:g.32339734_32339735insTT	NM_000059.4:c.5379_5380insTT	V1794Lfs*2	pathogenic
13	32333329	A	C	BRCA2	NC_000013.11:g.32333329A>C	NM_000059.4:c.1851A>C	S617=	likely_benign
13	32394740	TAA	T	BRCA2	NC_000013.11:g.32394742_32394743del	NM_000059.4:c.9310_9311del	K3104Vfs*6	pathogenic
13	32337765	T	TG	BRCA2	NC_000013.11:g.32337766dup	NM_000059.4:c.3411dup	Q1138Afs*6	pathogenic
13	32319134	A	G	BRCA2	NC_000013.11:g.32319134A>G	NM_000059.4:c.125A>G	Y42C	benign
13	32356475	AT	A	BRCA2	NC_000013.11:g.32356477del	NM_000059.4:c.7485del	K2496Rfs*28	pathogenic
13	32340774	G	GA	BRCA2	NC_000013.11:g.32340774_32340775insA	NM_000059.4:c.6419_6420insA	G2141Wfs*6	pathogenic
13	32356483	G	A	BRCA2	NC_000013.11:g.32356483G>A	NM_000059.4:c.7491G>A	K2497=	likely_benign
13	32339092	A	ATG	BRCA2	NC_000013.11:g.32339095_32339096dup	NM_000059.4:c.4740_4741dup	E1581Vfs*37	pathogenic
13	32332392	AAGAT	A	BRCA2	NC_000013.11:g.32332395_32332398del	NM_000059.4:c.917_920del	D306Vfs*17	pathogenic
13	32349428	G	A	BRCA2	NC_000013.11:g.32349428G>A	NM_000059.4:c.7007+2532G>A	?	benign
13	32339640	ATC	A	BRCA2	NC_000013.11:g.32339645_32339646del	NM_000059.4:c.5290_5291del	S1764Kfs*3	pathogenic
13	32370512	T	C	BRCA2	NC_000013.11:g.32370512T>C	NM_000059.4:c.8442T>C	N2814=	likely_benign
13	32363401	TC	T	BRCA2	NC_000013.11:g.32363403del	NM_000059.4:c.8201del	P2734Lfs*4	pathogenic
13	32340621	AGCATAGTC	A	BRCA2	NC_000013.11:g.32340622_32340629del	NM_000059.4:c.6267_6274del	E2089Dfs*8	pathogenic
13	32329441	A	G	BRCA2	NC_000013.11:g.32329441A>G	NM_000059.4:c.632-2A>G	?	pathogenic
13	32339618	G	T	BRCA2	NC_000013.11:g.32339618G>T	NM_000059.4:c.5263G>T	E1755*	pathogenic
13	32340685	TAA	T	BRCA2	NC_000013.11:g.32340686_32340687del	NM_000059.4:c.6331_6332del	K2111Efs*17	pathogenic
13	32340352	GT	G	BRCA2	NC_000013.11:g.32340356del	NM_000059.4:c.6001del	S2001Lfs*3	pathogenic
13	32356549	TC	T	BRCA2	NC_000013.11:g.32356550del	NM_000059.4:c.7558del	R2520Efs*4	pathogenic
13	32359497	A	G	BRCA2	NC_000013.11:g.32359497A>G	NM_000059.4:c.7805+1568A>G	?	benign
13	32336961	C	G	BRCA2	NC_000013.11:g.32336961C>G	NM_000059.4:c.2606C>G	S869*	pathogenic
13	32391943	T	C	BRCA2	NC_000013.11:g.32391943T>C	NM_000059.4:c.9257-2746T>C	?	benign
13	32337149	GAC	G	BRCA2	NC_000013.11:g.32337153_32337154del	NM_000059.4:c.2798_2799del	T933Rfs*2	pathogenic
13	32333111	GT	G	BRCA2	NC_000013.11:g.32333114del	NM_000059.4:c.1636del	C546Afs*12	pathogenic
13	32337690	CAG	C	BRCA2	NC_000013.11:g.32337692_32337693del	NM_000059.4:c.3337_3338del	E1113Tfs*13	pathogenic
13	32340289	T	C	BRCA2	NC_000013.11:g.32340289T>C	NM_000059.4:c.5934T>C	F1978=	likely_benign
13	32399167	C	A	BRCA2	NC_000013.11:g.32399167C>A	NM_000059.4:c.*397C>A	?	benign
13	32332659	A	C	BRCA2	NC_000013.11:g.32332659A>C	NM_000059.4:c.1181A>C	E394A	benign
13	32341112	CT	C	BRCA2	NC_000013.11:g.32341117del	NM_000059.4:c.6762del	F2254Lfs*26	pathogenic
13	32341120	A	G	BRCA2	NC_000013.11:g.32341120A>G	NM_000059.4:c.6765A>G	T2255=	likely_benign
13	32339340	C	G	BRCA2	NC_000013.11:g.32339340C>G	NM_000059.4:c.4985C>G	S1662*	pathogenic
13	32338036	G	C	BRCA2	NC_000013.11:g.32338036G>C	NM_000059.4:c.3681G>C	L1227=	likely_benign
13	32339409	C	A	BRCA2	NC_000013.11:g.32339409C>A	NM_000059.4:c.5054C>A	S1685*	pathogenic
13	32341013	GA	G	BRCA2	NC_000013.11:g.32341017del	NM_000059.4:c.6662del	N2221Tfs*8	pathogenic
13	32340389	TC	T	BRCA2	NC_000013.11:g.32340391del	NM_000059.4:c.6036del	V2014Yfs*26	pathogenic
13	32392531	G	A	BRCA2	NC_000013.11:g.32392531G>A	NM_000059.4:c.9257-2158G>A	?	benign
13	32336967	C	CA	BRCA2	NC_000013.11:g.32336972dup	NM_000059.4:c.2617dup	I873Nfs*8	pathogenic
13	32339285	GA	G	BRCA2	NC_000013.11:g.32339290del	NM_000059.4:c.4935del	E1646Kfs*24	pathogenic
13	32316853	G	C	BRCA2	NC_000013.11:g.32316853G>C	NM_000059.4:c.67+326G>C	?	benign
13	32379850	TA	T	BRCA2	NC_000013.11:g.32379853del	NM_000059.4:c.9057del	K3019Nfs*9	pathogenic
13	32363389	G	A	BRCA2	NC_000013.11:g.32363389G>A	NM_000059.4:c.8187G>A	K2729=	likely_benign
13	32394895	TTTCA	GAATGATC	BRCA2	NC_000013.11:g.32394895_32394899delinsGAATGATC	NM_000059.4:c.9463_9467delinsGAATGATC	F3155_Q3156delinsE*S	pathogenic
13	32319094	CTT	C	BRCA2	NC_000013.11:g.32319095_32319096del	NM_000059.4:c.86_87del	L29Qfs*4	pathogenic
13	32316492	TTTTTGAAA	T	BRCA2	NC_000013.11:g.32316497_32316504del	NM_000059.4:c.37_44del	E13*	pathogenic
13	32340151	TAACC	T	BRCA2	NC_000013.11:g.32340154_32340157del	NM_000059.4:c.5799_5802del	N1933Kfs*29	pathogenic
13	32370531	AT	A	BRCA2	NC_000013.11:g.32370533del	NM_000059.4:c.8463del	I2822Ffs*41	pathogenic
13	32337832	C	CAG	BRCA2	NC_000013.11:g.32337836_32337837dup	NM_000059.4:c.3481_3482dup	D1161Efs*8	pathogenic
13	32336452	GTTAT	G	BRCA2	NC_000013.11:g.32336458_32336461del	NM_000059.4:c.2103_2106del	F701Lfs*28	pathogenic
13	32336810	C	T	BRCA2	NC_000013.11:g.32336810C>T	NM_000059.4:c.2455C>T	Q819*	pathogenic
13	32340705	GTGTAAACTCAGAAA	G	BRCA2	NC_000013.11:g.32340708_32340721del	NM_000059.4:c.6353_6366del	V2118Gfs*6	pathogenic
13	32337870	C	A	BRCA2	NC_000013.11:g.32337870C>A	NM_000059.4:c.3515C>A	S1172*	pathogenic
13	32353471	A	G	BRCA2	NC_000013.11:g.32353471A>G	NM_000059.4:c.7008-1390A>G	?	benign
13	32357881	G	GGC	BRCA2	NC_000013.11:g.32357882_32357883dup	NM_000059.4:c.7758_7759dup	L2587Rfs*62	pathogenic
13	32336694	C	G	BRCA2	NC_000013.11:g.32336694C>G	NM_000059.4:c.2339C>G	S780*	pathogenic
13	32395964	T	C	BRCA2	NC_000013.11:g.32395964T>C	NM_000059.4:c.9502-934T>C	?	benign
13	32338358	G	T	BRCA2	NC_000013.11:g.32338358G>T	NM_000059.4:c.4003G>T	E1335*	pathogenic
13	32332662	G	A	BRCA2	NC_000013.11:g.32332662G>A	NM_000059.4:c.1184G>A	W395*	pathogenic
13	32379495	C	G	BRCA2	NC_000013.11:g.32379495C>G	NM_000059.4:c.8933C>G	S2978*	pathogenic
13	32340347	C	T	BRCA2	NC_000013.11:g.32340347C>T	NM_000059.4:c.5992C>T	Q1998*	pathogenic
13	32397569	A	AT	BRCA2	NC_000013.11:g.32397578dup	NM_000059.4:c.9648+534dup	?	benign
13	32333066	A	T	BRCA2	NC_000013.11:g.32333066A>T	NM_000059.4:c.1588A>T	K530*	pathogenic
13	32340265	A	G	BRCA2	NC_000013.11:g.32340265A>G	NM_000059.4:c.5910A>G	S1970=	likely_benign
13	32398485	A	T	BRCA2	NC_000013.11:g.32398485A>T	NM_000059.4:c.9972A>T	P3324=	likely_benign
13	32338729	TA	T	BRCA2	NC_000013.11:g.32338731del	NM_000059.4:c.4376del	N1459Tfs*4	pathogenic
13	32340432	CAAGAG	C	BRCA2	NC_000013.11:g.32340437_32340441del	NM_000059.4:c.6082_6086del	E2028Kfs*19	pathogenic
13	32336579	C	T	BRCA2	NC_000013.11:g.32336579C>T	NM_000059.4:c.2224C>T	Q742*	pathogenic
13	32362657	T	TC	BRCA2	NC_000013.11:g.32362657_32362658insC	NM_000059.4:c.7940_7941insC	S2648Kfs*14	pathogenic
13	32338361	T	TA	BRCA2	NC_000013.11:g.32338361_32338362insA	NM_000059.4:c.4006_4007insA	F1336Yfs*2	pathogenic
13	32394846	ATTTGCTGGAGATT	A	BRCA2	NC_000013.11:g.32394850_32394862del	NM_000059.4:c.9418_9430del	A3140Lfs*19	pathogenic
13	32333363	CTTACATT	C	BRCA2	NC_000013.11:g.32333365_32333371del	NM_000059.4:c.1887_1893del	T630Qfs*12	pathogenic
13	32394837	TCTTA	T	BRCA2	NC_000013.11:g.32394841_32394844del	NM_000059.4:c.9409_9412del	T3137Yfs*25	pathogenic
13	32337580	T	C	BRCA2	NC_000013.11:g.32337580T>C	NM_000059.4:c.3225T>C	S1075=	likely_benign
13	32339514	C	A	BRCA2	NC_000013.11:g.32339514C>A	NM_000059.4:c.5159C>A	S1720*	pathogenic
13	32346481	G	A	BRCA2	NC_000013.11:g.32346481G>A	NM_000059.4:c.6938-346G>A	?	benign
13	32337521	CAAAAG	C	BRCA2	NC_000013.11:g.32337525_32337529del	NM_000059.4:c.3170_3174del	K1057Tfs*8	pathogenic
13	32337038	GC	G	BRCA2	NC_000013.11:g.32337039del	NM_000059.4:c.2684del	A895Vfs*9	pathogenic
13	32363642	G	A	BRCA2	NC_000013.11:g.32363642G>A	NM_000059.4:c.8331+109G>A	?	benign
13	32394871	T	TC	BRCA2	NC_000013.11:g.32394872dup	NM_000059.4:c.9440dup	A3148Cfs*2	pathogenic
13	32336464	C	T	BRCA2	NC_000013.11:g.32336464C>T	NM_000059.4:c.2109C>T	T703=	likely_benign
13	32385907	T	C	BRCA2	NC_000013.11:g.32385907T>C	NM_000059.4:c.9256+5762T>C	?	benign
13	32322585	C	T	BRCA2	NC_000013.11:g.32322585C>T	NM_000059.4:c.317-2491C>T	?	benign
13	32341048	T	C	BRCA2	NC_000013.11:g.32341048T>C	NM_000059.4:c.6693T>C	A2231=	likely_benign
13	32337409	G	A	BRCA2	NC_000013.11:g.32337409G>A	NM_000059.4:c.3054G>A	K1018=	likely_benign
13	32340880	G	A	BRCA2	NC_000013.11:g.32340880G>A	NM_000059.4:c.6525G>A	E2175=	likely_benign
13	32336723	GA	G	BRCA2	NC_000013.11:g.32336725del	NM_000059.4:c.2370del	E790Dfs*20	pathogenic
13	32336359	G	A	BRCA2	NC_000013.11:g.32336359G>A	NM_000059.4:c.2004G>A	R668=	likely_benign
13	32398701	T	C	BRCA2	NC_000013.11:g.32398701T>C	NM_000059.4:c.10188T>C	S3396=	likely_benign
13	32336488	C	T	BRCA2	NC_000013.11:g.32336488C>T	NM_000059.4:c.2133C>T	C711=	likely_benign
13	32339950	AT	C	BRCA2	NC_000013.11:g.32339950_32339951delinsC	NM_000059.4:c.5595_5596delinsC	F1866Lfs*8	pathogenic
13	32332465	GAA	G	BRCA2	NC_000013.11:g.32332471_32332472del	NM_000059.4:c.993_994del	K331Nfs*4	pathogenic
13	32355156	C	T	BRCA2	NC_000013.11:g.32355156C>T	NM_000059.4:c.7303C>T	Q2435*	pathogenic
13	32355172	A	G	BRCA2	NC_000013.11:g.32355172A>G	NM_000059.4:c.7319A>G	H2440R	benign
13	32339248	AAG	A	BRCA2	NC_000013.11:g.32339249_32339250del	NM_000059.4:c.4894_4895del	S1632Yfs*6	pathogenic
13	32340385	C	A	BRCA2	NC_000013.11:g.32340385C>A	NM_000059.4:c.6030C>A	V2010=	likely_benign
13	32397919	T	G	BRCA2	NC_000013.11:g.32397919T>G	NM_000059.4:c.9649-243T>G	?	benign
13	32338872	TC	T	BRCA2	NC_000013.11:g.32338874del	NM_000059.4:c.4519del	Q1507Rfs*36	pathogenic
13	32329548	C	T	BRCA2	NC_000013.11:g.32329548C>T	NM_000059.4:c.681+56C>T	?	benign
13	32325701	C	T	BRCA2	NC_000013.11:g.32325701C>T	NM_000059.4:c.426-400C>T	?	benign
13	32338444	CAT	C	BRCA2	NC_000013.11:g.32338447_32338448del	NM_000059.4:c.4092_4093del	I1364Mfs*3	pathogenic
13	32398458	A	G	BRCA2	NC_000013.11:g.32398458A>G	NM_000059.4:c.9945A>G	K3315=	likely_benign
13	32394722	GTTACAATTTACTGGCA	G	BRCA2	NC_000013.11:g.32394723_32394738del	NM_000059.4:c.9291_9306del	C3097*	pathogenic
13	32357920	A	G	BRCA2	NC_000013.11:g.32357920A>G	NM_000059.4:c.7796A>G	E2599G	likely_pathogenic
13	32338698	ATTTCT	A	BRCA2	NC_000013.11:g.32338701_32338705del	NM_000059.4:c.4346_4350del	F1449*	pathogenic
13	32339404	G	A	BRCA2	NC_000013.11:g.32339404G>A	NM_000059.4:c.5049G>A	Q1683=	likely_benign
13	32354943	G	T	BRCA2	NC_000013.11:g.32354943G>T	NM_000059.4:c.7090G>T	E2364*	pathogenic
13	32362575	GT	G	BRCA2	NC_000013.11:g.32362578del	NM_000059.4:c.7861del	Y2621Ifs*27	pathogenic
13	32370971	T	C	BRCA2	NC_000013.11:g.32370971T>C	NM_000059.4:c.8503T>C	S2835P	benign
13	32393237	TC	T	BRCA2	NC_000013.11:g.32393238del	NM_000059.4:c.9257-1451del	?	benign
13	32339319	AC	A	BRCA2	NC_000013.11:g.32339320del	NM_000059.4:c.4965del	Y1655*	pathogenic
13	32341170	GAA	G	BRCA2	NC_000013.11:g.32341171_32341172del	NM_000059.4:c.6816_6817del	G2274Rfs*18	pathogenic
13	32332836	C	CA	BRCA2	NC_000013.11:g.32332840dup	NM_000059.4:c.1362dup	S455Ifs*7	pathogenic
13	32355150	CA	C	BRCA2	NC_000013.11:g.32355154del	NM_000059.4:c.7301del	K2434Sfs*33	pathogenic
13	32370985	C	T	BRCA2	NC_000013.11:g.32370985C>T	NM_000059.4:c.8517C>T	Y2839=	likely_benign
13	32363251	A	AT	BRCA2	NC_000013.11:g.32363251_32363252insT	NM_000059.4:c.8049_8050insT	K2684*	pathogenic
13	32397002	G	C	BRCA2	NC_000013.11:g.32397002G>C	NM_000059.4:c.9606G>C	P3202=	likely_benign
13	32340830	C	T	BRCA2	NC_000013.11:g.32340830C>T	NM_000059.4:c.6475C>T	Q2159*	pathogenic
13	32340437	G	T	BRCA2	NC_000013.11:g.32340437G>T	NM_000059.4:c.6082G>T	E2028*	pathogenic
13	32355095	A	G	BRCA2	NC_000013.11:g.32355095A>G	NM_000059.4:c.7242A>G	S2414=	benign
13	32332780	A	G	BRCA2	NC_000013.11:g.32332780A>G	NM_000059.4:c.1302A>G	K434=	likely_benign
13	32333137	A	G	BRCA2	NC_000013.11:g.32333137A>G	NM_000059.4:c.1659A>G	L553=	likely_benign
13	32333159	G	T	BRCA2	NC_000013.11:g.32333159G>T	NM_000059.4:c.1681G>T	G561*	pathogenic
13	32331014	A	G	BRCA2	NC_000013.11:g.32331014A>G	NM_000059.4:c.777A>G	R259=	likely_benign
13	32349851	A	G	BRCA2	NC_000013.11:g.32349851A>G	NM_000059.4:c.7007+2955A>G	?	benign
13	32379472	G	A	BRCA2	NC_000013.11:g.32379472G>A	NM_000059.4:c.8910G>A	W2970*	pathogenic
13	32379391	G	A	BRCA2	NC_000013.11:g.32379391G>A	NM_000059.4:c.8829G>A	Q2943=	likely_benign
13	32363510	GC	G	BRCA2	NC_000013.11:g.32363514del	NM_000059.4:c.8312del	P2771Qfs*6	pathogenic
13	32356446	AGAATGCCAGAGATATACAGGATATGC	A	BRCA2	NC_000013.11:g.32356451_32356476del	NM_000059.4:c.7459_7484del	A2487*	pathogenic
13	32329806	T	TTA	BRCA2	NC_000013.11:g.32329817_32329818dup	NM_000059.4:c.681+325_681+326dup	-	benign
13	32380117	A	T	BRCA2	NC_000013.11:g.32380117A>T	NM_000059.4:c.9228A>T	G3076=	likely_benign
13	32357805	C	T	BRCA2	NC_000013.11:g.32357805C>T	NM_000059.4:c.7681C>T	Q2561*	pathogenic
13	32332456	C	A	BRCA2	NC_000013.11:g.32332456C>A	NM_000059.4:c.978C>A	S326R	benign
13	32333062	C	CA	BRCA2	NC_000013.11:g.32333062_32333063insA	NM_000059.4:c.1584_1585insA	F529Ifs*2	pathogenic
13	32339518	CAG	C	BRCA2	NC_000013.11:g.32339519_32339520del	NM_000059.4:c.5164_5165del	S1722Yfs*4	pathogenic
13	32322539	G	A	BRCA2	NC_000013.11:g.32322539G>A	NM_000059.4:c.317-2537G>A	?	benign
13	32379784	ATA	TT	BRCA2	NC_000013.11:g.32379784_32379786delinsTT	NM_000059.4:c.8988_8990delinsTT	L2996Ffs*5	pathogenic
13	32376737	T	C	BRCA2	NC_000013.11:g.32376737T>C	NM_000059.4:c.8700T>C	D2900=	likely_benign
13	32336943	AT	A	BRCA2	NC_000013.11:g.32336944del	NM_000059.4:c.2589del	Q864Kfs*10	pathogenic
13	32340212	G	T	BRCA2	NC_000013.11:g.32340212G>T	NM_000059.4:c.5857G>T	E1953*	pathogenic
13	32316090	G	T	BRCA2	NC_000013.11:g.32316090G>T	NM_000059.4:c.-39-332G>T	?	benign
13	32379503	G	T	BRCA2	NC_000013.11:g.32379503G>T	NM_000059.4:c.8941G>T	E2981*	pathogenic
13	32389810	A	G	BRCA2	NC_000013.11:g.32389810A>G	NM_000059.4:c.9257-4879A>G	?	benign
13	32340347	CA	C	BRCA2	NC_000013.11:g.32340349del	NM_000059.4:c.5994del	V1999Cfs*5	pathogenic
13	32338366	TG	T	BRCA2	NC_000013.11:g.32338368del	NM_000059.4:c.4013del	G1338Afs*36	pathogenic
13	32339990	G	T	BRCA2	NC_000013.11:g.32339990G>T	NM_000059.4:c.5635G>T	E1879*	pathogenic
13	32315859	C	T	BRCA2	NC_000013.11:g.32315859C>T	NM_000059.4:c.-40+192C>T	?	benign
13	32319181	G	T	BRCA2	NC_000013.11:g.32319181G>T	NM_000059.4:c.172G>T	E58*	pathogenic
13	32333227	GA	G	BRCA2	NC_000013.11:g.32333232del	NM_000059.4:c.1754del	K585Rfs*29	pathogenic
13	32340594	T	G	BRCA2	NC_000013.11:g.32340594T>G	NM_000059.4:c.6239T>G	L2080*	pathogenic
13	32380019	AT	A	BRCA2	NC_000013.11:g.32380023del	NM_000059.4:c.9134del	L3045Yfs*17	pathogenic
13	32357800	C	CT	BRCA2	NC_000013.11:g.32357804dup	NM_000059.4:c.7680dup	Q2561Sfs*5	pathogenic
13	32336561	GCAGCATGT	G	BRCA2	NC_000013.11:g.32336564_32336571del	NM_000059.4:c.2209_2216del	A737Pfs*11	pathogenic
13	32339054	C	CT	BRCA2	NC_000013.11:g.32339055dup	NM_000059.4:c.4700dup	Y1569Vfs*6	pathogenic
13	32357888	A	T	BRCA2	NC_000013.11:g.32357888A>T	NM_000059.4:c.7764A>T	I2588=	likely_benign
13	32330991	GAC	G	BRCA2	NC_000013.11:g.32330993_32330994del	NM_000059.4:c.756_757del	D252Efs*2	pathogenic
13	32362650	A	T	BRCA2	NC_000013.11:g.32362650A>T	NM_000059.4:c.7933A>T	R2645*	pathogenic
13	32326267	A	G	BRCA2	NC_000013.11:g.32326267A>G	NM_000059.4:c.501A>G	T167=	likely_benign
13	32326115	A	G	BRCA2	NC_000013.11:g.32326115A>G	NM_000059.4:c.440A>G	Q147R	benign
13	32338323	AAT	A	BRCA2	NC_000013.11:g.32338327_32338328del	NM_000059.4:c.3972_3973del	T1325Cfs*4	pathogenic
13	32332367	G	T	BRCA2	NC_000013.11:g.32332367G>T	NM_000059.4:c.889G>T	E297*	pathogenic
13	32332653	CCTGTG	C	BRCA2	NC_000013.11:g.32332654_32332658del	NM_000059.4:c.1176_1180del	C393Mfs*26	pathogenic
13	32370422	G	T	BRCA2	NC_000013.11:g.32370422G>T	NM_000059.4:c.8352G>T	R2784=	likely_benign
13	32326497	AG	A	BRCA2	NC_000013.11:g.32326500del	NM_000059.4:c.518del	G173Vfs*12	pathogenic
13	32375530	C	G	BRCA2	NC_000013.11:g.32375530C>G	NM_000059.4:c.8633-1140C>G	?	benign
13	32394842	C	CT	BRCA2	NC_000013.11:g.32394845dup	NM_000059.4:c.9413dup	L3138Ffs*12	pathogenic
13	32379513	C	G	BRCA2	NC_000013.11:g.32379513C>G	NM_000059.4:c.8951C>G	S2984*	pathogenic
13	32394749	G	A	BRCA2	NC_000013.11:g.32394749G>A	NM_000059.4:c.9317G>A	W3106*	pathogenic
13	32339711	AG	A	BRCA2	NC_000013.11:g.32339712del	NM_000059.4:c.5357del	S1786Ifs*5	pathogenic
13	32370443	AC	A	BRCA2	NC_000013.11:g.32370444del	NM_000059.4:c.8374del	G2793Dfs*28	pathogenic
13	32337129	C	CT	BRCA2	NC_000013.11:g.32337130dup	NM_000059.4:c.2775dup	T926Yfs*10	pathogenic
13	32338826	CTGAA	C	BRCA2	NC_000013.11:g.32338827_32338830del	NM_000059.4:c.4472_4475del	L1491Qfs*12	pathogenic
13	32339086	ATTAGC	G	BRCA2	NC_000013.11:g.32339086_32339091delinsG	NM_000059.4:c.4731_4736delinsG	L1578Mfs*2	pathogenic
13	32357760	TCTAAACATTG	T	BRCA2	NC_000013.11:g.32357762_32357771del	NM_000059.4:c.7638_7647del	K2547*	pathogenic
13	32363524	T	TA	BRCA2	NC_000013.11:g.32363525dup	NM_000059.4:c.8323dup	M2775Nfs*7	pathogenic
13	32325152	C	T	BRCA2	NC_000013.11:g.32325152C>T	NM_000059.4:c.393C>T	S131=	likely_benign
13	32341004	AAAGAT	A	BRCA2	NC_000013.11:g.32341005_32341009del	NM_000059.4:c.6650_6654del	K2217Ifs*6	pathogenic
13	32394693	TG	T	BRCA2	NC_000013.11:g.32394694del	NM_000059.4:c.9262del	A3088Pfs*16	pathogenic
13	32355024	G	GA	BRCA2	NC_000013.11:g.32355030dup	NM_000059.4:c.7177dup	M2393Nfs*19	pathogenic
13	32336556	T	TAA	BRCA2	NC_000013.11:g.32336556_32336557insAA	NM_000059.4:c.2201_2202insAA	A735Rfs*38	pathogenic
13	32397028	C	CA	BRCA2	NC_000013.11:g.32397029dup	NM_000059.4:c.9633dup	G3212Rfs*10	pathogenic
13	32346825	A	G	BRCA2	NC_000013.11:g.32346825A>G	NM_000059.4:c.6938-2A>G	?	pathogenic
13	32338816	A	G	BRCA2	NC_000013.11:g.32338816A>G	NM_000059.4:c.4461A>G	K1487=	likely_benign
13	32363233	A	AAG	BRCA2	NC_000013.11:g.32363234_32363235dup	NM_000059.4:c.8032_8033dup	D2679Gfs*16	pathogenic
13	32340670	A	C	BRCA2	NC_000013.11:g.32340670A>C	NM_000059.4:c.6315A>C	I2105=	likely_benign
13	32398004	A	G	BRCA2	NC_000013.11:g.32398004A>G	NM_000059.4:c.9649-158A>G	?	benign
13	32393030	TG	T	BRCA2	NC_000013.11:g.32393031del	NM_000059.4:c.9257-1658del	?	benign
13	32376668	A	G	BRCA2	NC_000013.11:g.32376668A>G	NM_000059.4:c.8633-2A>G	?	pathogenic
13	32339739	AAG	A	BRCA2	NC_000013.11:g.32339741_32339742del	NM_000059.4:c.5386_5387del	D1796Cfs*10	pathogenic
13	32340210	T	A	BRCA2	NC_000013.11:g.32340210T>A	NM_000059.4:c.5855T>A	L1952*	pathogenic
13	32339537	GAC	G	BRCA2	NC_000013.11:g.32339539_32339540del	NM_000059.4:c.5184_5185del	D1728Efs*14	pathogenic
13	32338826	C	T	BRCA2	NC_000013.11:g.32338826C>T	NM_000059.4:c.4471C>T	L1491=	likely_benign
13	32339603	TC	T	BRCA2	NC_000013.11:g.32339605del	NM_000059.4:c.5250del	Y1751Tfs*26	pathogenic
13	32322709	G	A	BRCA2	NC_000013.11:g.32322709G>A	NM_000059.4:c.317-2367G>A	?	benign
13	32325147	GT	G	BRCA2	NC_000013.11:g.32325150del	NM_000059.4:c.391del	S131Pfs*5	pathogenic
13	32344575	A	T	BRCA2	NC_000013.11:g.32344575A>T	NM_000059.4:c.6859A>T	R2287*	pathogenic
13	32344166	GA	G	BRCA2	NC_000013.11:g.32344183del	NM_000059.4:c.6842-375del	?	benign
13	32349814	CA	C	BRCA2	NC_000013.11:g.32349832del	NM_000059.4:c.7007+2936del	?	benign
13	32337305	G	T	BRCA2	NC_000013.11:g.32337305G>T	NM_000059.4:c.2950G>T	E984*	pathogenic
13	32357753	TG	T	BRCA2	NC_000013.11:g.32357755del	NM_000059.4:c.7631del	G2544Afs*7	pathogenic
13	32339007	AAGGT	A	BRCA2	NC_000013.11:g.32339009_32339012del	NM_000059.4:c.4654_4657del	G1552Lfs*15	pathogenic
13	32357740	A	G	BRCA2	NC_000013.11:g.32357740A>G	NM_000059.4:c.7618-2A>G	?	pathogenic
13	32362660	GC	G	BRCA2	NC_000013.11:g.32362663del	NM_000059.4:c.7946del	P2649Qfs*8	pathogenic
13	32319180	C	G	BRCA2	NC_000013.11:g.32319180C>G	NM_000059.4:c.171C>G	Y57*	pathogenic
13	32338216	T	TA	BRCA2	NC_000013.11:g.32338218dup	NM_000059.4:c.3863dup	N1288Kfs*2	pathogenic
13	32341084	T	A	BRCA2	NC_000013.11:g.32341084T>A	NM_000059.4:c.6729T>A	S2243=	likely_benign
13	32339902	TA	T	BRCA2	NC_000013.11:g.32339906del	NM_000059.4:c.5551del	I1851Sfs*12	pathogenic
13	32338764	TAAGA	T	BRCA2	NC_000013.11:g.32338770_32338773del	NM_000059.4:c.4415_4418del	K1472Tfs*6	pathogenic
13	32363225	A	G	BRCA2	NC_000013.11:g.32363225A>G	NM_000059.4:c.8023A>G	I2675V	pathogenic
13	32363500	A	G	BRCA2	NC_000013.11:g.32363500A>G	NM_000059.4:c.8298A>G	T2766=	likely_benign
13	32356498	C	G	BRCA2	NC_000013.11:g.32356498C>G	NM_000059.4:c.7506C>G	R2502=	likely_benign
13	32339132	GA	G	BRCA2	NC_000013.11:g.32339135del	NM_000059.4:c.4780del	M1594Cfs*23	pathogenic
13	32371492	T	C	BRCA2	NC_000013.11:g.32371492T>C	NM_000059.4:c.8632+392T>C	?	benign
13	32341075	G	GAC	BRCA2	NC_000013.11:g.32341077_32341078dup	NM_000059.4:c.6722_6723dup	D2242Qfs*39	pathogenic
13	32339731	CA	C	BRCA2	NC_000013.11:g.32339733del	NM_000059.4:c.5378del	N1793Mfs*2	pathogenic
13	32337568	T	C	BRCA2	NC_000013.11:g.32337568T>C	NM_000059.4:c.3213T>C	H1071=	likely_benign
13	32338918	A	G	BRCA2	NC_000013.11:g.32338918A>G	NM_000059.4:c.4563A>G	L1521=	benign
13	32339296	A	G	BRCA2	NC_000013.11:g.32339296A>G	NM_000059.4:c.4941A>G	T1647=	likely_benign
13	32388063	C	T	BRCA2	NC_000013.11:g.32388063C>T	NM_000059.4:c.9257-6626C>T	?	benign
13	32394172	A	G	BRCA2	NC_000013.11:g.32394172A>G	NM_000059.4:c.9257-517A>G	?	benign
13	32330986	TGACA	T	BRCA2	NC_000013.11:g.32330992_32330995del	NM_000059.4:c.755_758del	D252Vfs*24	pathogenic
13	32398320	AG	A	BRCA2	NC_000013.11:g.32398321del	NM_000059.4:c.9808del	A3270Pfs*5	pathogenic
13	32338234	AT	A	BRCA2	NC_000013.11:g.32338236del	NM_000059.4:c.3881del	L1294Yfs*7	pathogenic
13	32377040	G	A	BRCA2	NC_000013.11:g.32377040G>A	NM_000059.4:c.8754+249G>A	?	benign
13	32339908	C	T	BRCA2	NC_000013.11:g.32339908C>T	NM_000059.4:c.5553C>T	I1851=	likely_benign
13	32337106	A	G	BRCA2	NC_000013.11:g.32337106A>G	NM_000059.4:c.2751A>G	V917=	likely_benign
13	32394722	GTTACAAT	G	BRCA2	NC_000013.11:g.32394727_32394733del	NM_000059.4:c.9295_9301del	N3099Wfs*3	pathogenic
13	32319312	C	T	BRCA2	NC_000013.11:g.32319312C>T	NM_000059.4:c.303C>T	F101=	likely_benign
13	32329487	AC	A	BRCA2	NC_000013.11:g.32329488del	NM_000059.4:c.677del	T226Mfs*4	pathogenic
13	32371052	C	CT	BRCA2	NC_000013.11:g.32371053dup	NM_000059.4:c.8585dup	E2863Rfs*6	pathogenic
13	32340128	C	T	BRCA2	NC_000013.11:g.32340128C>T	NM_000059.4:c.5773C>T	Q1925*	pathogenic
13	32324727	A	G	BRCA2	NC_000013.11:g.32324727A>G	NM_000059.4:c.317-349A>G	?	benign
13	32340950	AC	A	BRCA2	NC_000013.11:g.32340951del	NM_000059.4:c.6596del	T2199Ifs*7	pathogenic
13	32338208	GA	G	BRCA2	NC_000013.11:g.32338215del	NM_000059.4:c.3860del	N1287Ifs*6	pathogenic
13	32362628	CT	C	BRCA2	NC_000013.11:g.32362631del	NM_000059.4:c.7914del	P2639Lfs*9	pathogenic
13	32339989	C	G	BRCA2	NC_000013.11:g.32339989C>G	NM_000059.4:c.5634C>G	N1878K	benign
13	32388542	T	A	BRCA2	NC_000013.11:g.32388542T>A	NM_000059.4:c.9257-6147T>A	?	benign
13	32326145	AG	A	BRCA2	NC_000013.11:g.32326146del	NM_000059.4:c.471del	K157Nfs*15	pathogenic
13	32329442	G	A	BRCA2	NC_000013.11:g.32329442G>A	NM_000059.4:c.632-1G>A	?	pathogenic
13	32333267	G	T	BRCA2	NC_000013.11:g.32333267G>T	NM_000059.4:c.1789G>T	E597*	pathogenic
13	32340343	A	G	BRCA2	NC_000013.11:g.32340343A>G	NM_000059.4:c.5988A>G	A1996=	likely_benign
13	32338456	AT	A	BRCA2	NC_000013.11:g.32338458del	NM_000059.4:c.4103del	L1368Yfs*6	pathogenic
13	32338236	T	A	BRCA2	NC_000013.11:g.32338236T>A	NM_000059.4:c.3881T>A	L1294*	pathogenic
13	32363510	G	A	BRCA2	NC_000013.11:g.32363510G>A	NM_000059.4:c.8308G>A	A2770T	benign
13	32340599	G	T	BRCA2	NC_000013.11:g.32340599G>T	NM_000059.4:c.6244G>T	E2082*	pathogenic
13	32399302	A	G	BRCA2	NC_000013.11:g.32399302A>G	NM_000059.4:c.*532A>G	?	benign
13	32333077	T	C	BRCA2	NC_000013.11:g.32333077T>C	NM_000059.4:c.1599T>C	T533=	likely_benign
13	32340052	T	C	BRCA2	NC_000013.11:g.32340052T>C	NM_000059.4:c.5697T>C	D1899=	likely_benign
13	32371025	A	T	BRCA2	NC_000013.11:g.32371025A>T	NM_000059.4:c.8557A>T	K2853*	pathogenic
13	32337952	CTG	C	BRCA2	NC_000013.11:g.32337954_32337955del	NM_000059.4:c.3599_3600del	C1200*	pathogenic
13	32319258	GC	G	BRCA2	NC_000013.11:g.32319259del	NM_000059.4:c.250del	Q84Kfs*3	pathogenic
13	32336413	TGATTA	T	BRCA2	NC_000013.11:g.32336414_32336418del	NM_000059.4:c.2059_2063del	D687*	pathogenic
13	32338737	CCT	C	BRCA2	NC_000013.11:g.32338738_32338739del	NM_000059.4:c.4383_4384del	L1462Kfs*3	pathogenic
13	32340762	TA	T	BRCA2	NC_000013.11:g.32340765del	NM_000059.4:c.6410del	N2137Mfs*31	pathogenic
13	32339930	AT	A	BRCA2	NC_000013.11:g.32339932del	NM_000059.4:c.5577del	V1862*	pathogenic
13	32355233	CA	C	BRCA2	NC_000013.11:g.32355235del	NM_000059.4:c.7382del	N2461Tfs*6	pathogenic
13	32319252	C	T	BRCA2	NC_000013.11:g.32319252C>T	NM_000059.4:c.243C>T	F81=	likely_benign
13	32338762	CAT	C	BRCA2	NC_000013.11:g.32338764_32338765del	NM_000059.4:c.4409_4410del	I1470Kfs*11	pathogenic
13	32336826	T	G	BRCA2	NC_000013.11:g.32336826T>G	NM_000059.4:c.2471T>G	L824*	pathogenic
13	32340979	T	C	BRCA2	NC_000013.11:g.32340979T>C	NM_000059.4:c.6624T>C	N2208=	likely_benign
13	32399625	C	A	BRCA2	NC_000013.11:g.32399625C>A	NM_000059.4:c.*855C>A	?	benign
13	32333366	AC	A	BRCA2	NC_000013.11:g.32333367del	NM_000059.4:c.1889del	T630Nfs*14	pathogenic
13	32339151	AT	A	BRCA2	NC_000013.11:g.32339152del	NM_000059.4:c.4797del	N1599Kfs*18	pathogenic
13	32332668	A	ATTAG	BRCA2	NC_000013.11:g.32332668_32332669insTTAG	NM_000059.4:c.1190_1191insTTAG	Q397Hfs*2	pathogenic
13	32336484	C	G	BRCA2	NC_000013.11:g.32336484C>G	NM_000059.4:c.2129C>G	S710*	pathogenic
13	32332321	CCA	C	BRCA2	NC_000013.11:g.32332324_32332325del	NM_000059.4:c.846_847del	I283Wfs*11	pathogenic
13	32339420	GC	AAA	BRCA2	NC_000013.11:g.32339420_32339421delinsAAA	NM_000059.4:c.5065_5066delinsAAA	A1689Kfs*6	pathogenic
13	32362628	C	CGAAA	BRCA2	NC_000013.11:g.32362628_32362629insGAAA	NM_000059.4:c.7911_7912insGAAA	F2638Efs*4	pathogenic
13	32330958	A	T	BRCA2	NC_000013.11:g.32330958A>T	NM_000059.4:c.721A>T	K241*	pathogenic
13	32336605	TACTG	T	BRCA2	NC_000013.11:g.32336609_32336612del	NM_000059.4:c.2254_2257del	D752Ffs*19	pathogenic
13	32363320	T	C	BRCA2	NC_000013.11:g.32363320T>C	NM_000059.4:c.8118T>C	N2706=	likely_benign
13	32363404	T	TC	BRCA2	NC_000013.11:g.32363408dup	NM_000059.4:c.8206dup	L2736Pfs*28	pathogenic
13	32326134	A	C	BRCA2	NC_000013.11:g.32326134A>C	NM_000059.4:c.459A>C	P153=	likely_benign
13	32337324	TGAACAAATGGGCA	T	BRCA2	NC_000013.11:g.32337326_32337338del	NM_000059.4:c.2971_2983del	N991Dfs*3	pathogenic
13	32339981	G	T	BRCA2	NC_000013.11:g.32339981G>T	NM_000059.4:c.5626G>T	E1876*	pathogenic
13	32338599	AG	A	BRCA2	NC_000013.11:g.32338600del	NM_000059.4:c.4245del	E1415Dfs*4	pathogenic
13	32337930	T	G	BRCA2	NC_000013.11:g.32337930T>G	NM_000059.4:c.3575T>G	F1192C	benign
13	32363432	AGACT	A	BRCA2	NC_000013.11:g.32363436_32363439del	NM_000059.4:c.8234_8237del	L2745Qfs*31	pathogenic
13	32363178	GATATGATACGGAA	G	BRCA2	NC_000013.11:g.32363181_32363193del	NM_000059.4:c.7979_7991del	Y2660Lfs*9	pathogenic
13	32338933	A	G	BRCA2	NC_000013.11:g.32338933A>G	NM_000059.4:c.4578A>G	T1526=	benign
13	32339969	A	T	BRCA2	NC_000013.11:g.32339969A>T	NM_000059.4:c.5614A>T	K1872*	pathogenic
13	32332921	TC	T	BRCA2	NC_000013.11:g.32332922del	NM_000059.4:c.1444del	A483Qfs*2	pathogenic
13	32355136	TG	T	BRCA2	NC_000013.11:g.32355138del	NM_000059.4:c.7285del	E2429Rfs*38	pathogenic
13	32333275	TTATAA	T	BRCA2	NC_000013.11:g.32333276_32333280del	NM_000059.4:c.1798_1802del	Y600Rfs*14	pathogenic
13	32340317	GTA	G	BRCA2	NC_000013.11:g.32340319_32340320del	NM_000059.4:c.5964_5965del	S1989Rfs*13	pathogenic
13	32371043	CA	C	BRCA2	NC_000013.11:g.32371047del	NM_000059.4:c.8579del	K2860Rfs*3	pathogenic
13	32338835	AGT	A	BRCA2	NC_000013.11:g.32338838_32338839del	NM_000059.4:c.4483_4484del	V1495Pfs*18	pathogenic
13	32326480	C	T	BRCA2	NC_000013.11:g.32326480C>T	NM_000059.4:c.517-19C>T	?	benign
13	32363351	G	T	BRCA2	NC_000013.11:g.32363351G>T	NM_000059.4:c.8149G>T	A2717S	benign
13	32375718	G	A	BRCA2	NC_000013.11:g.32375718G>A	NM_000059.4:c.8633-952G>A	?	benign
13	32339053	C	T	BRCA2	NC_000013.11:g.32339053C>T	NM_000059.4:c.4698C>T	T1566=	likely_benign
13	32363240	GAC	G	BRCA2	NC_000013.11:g.32363244_32363245del	NM_000059.4:c.8042_8043del	T2681Sfs*11	pathogenic
13	32337195	T	TG	BRCA2	NC_000013.11:g.32337197dup	NM_000059.4:c.2842dup	V948Gfs*11	pathogenic
13	32338771	GA	G	BRCA2	NC_000013.11:g.32338773del	NM_000059.4:c.4418del	N1473Tfs*6	pathogenic
13	32337625	GTTAT	G	BRCA2	NC_000013.11:g.32337628_32337631del	NM_000059.4:c.3273_3276del	L1091Ffs*12	pathogenic
13	32398437	C	G	BRCA2	NC_000013.11:g.32398437C>G	NM_000059.4:c.9924C>G	Y3308*	pathogenic
13	32340365	GAAGAT	G	BRCA2	NC_000013.11:g.32340367_32340371del	NM_000059.4:c.6012_6016del	D2005Yfs*11	pathogenic
13	32385062	C	T	BRCA2	NC_000013.11:g.32385062C>T	NM_000059.4:c.9256+4917C>T	?	benign
13	32398178	GT	G	BRCA2	NC_000013.11:g.32398179del	NM_000059.4:c.9666del	C3222Wfs*27	pathogenic
13	32338680	C	G	BRCA2	NC_000013.11:g.32338680C>G	NM_000059.4:c.4325C>G	S1442*	pathogenic
13	32336976	CTG	C	BRCA2	NC_000013.11:g.32336978_32336979del	NM_000059.4:c.2623_2624del	V875Qfs*5	pathogenic
13	32340335	C	T	BRCA2	NC_000013.11:g.32340335C>T	NM_000059.4:c.5980C>T	Q1994*	pathogenic
13	32342160	C	A	BRCA2	NC_000013.11:g.32342160C>A	NM_000059.4:c.6841+964C>A	?	benign
13	32362658	A	C	BRCA2	NC_000013.11:g.32362658A>C	NM_000059.4:c.7941A>C	L2647=	likely_benign
13	32333049	TG	T	BRCA2	NC_000013.11:g.32333050del	NM_000059.4:c.1572del	M524Ifs*34	pathogenic
13	32356526	C	T	BRCA2	NC_000013.11:g.32356526C>T	NM_000059.4:c.7534C>T	L2512F	benign
13	32363345	A	T	BRCA2	NC_000013.11:g.32363345A>T	NM_000059.4:c.8143A>T	K2715*	pathogenic
13	32376766	AT	A	BRCA2	NC_000013.11:g.32376767del	NM_000059.4:c.8730del	N2910Kfs*17	pathogenic
13	32355062	CAA	C	BRCA2	NC_000013.11:g.32355064_32355065del	NM_000059.4:c.7211_7212del	K2404Sfs*7	pathogenic
13	32336872	C	A	BRCA2	NC_000013.11:g.32336872C>A	NM_000059.4:c.2517C>A	Y839*	pathogenic
13	32338439	CA	C	BRCA2	NC_000013.11:g.32338440del	NM_000059.4:c.4085del	H1362Pfs*12	pathogenic
13	32338103	G	GA	BRCA2	NC_000013.11:g.32338106dup	NM_000059.4:c.3751dup	T1251Nfs*14	pathogenic
13	32339460	CAGAA	C	BRCA2	NC_000013.11:g.32339465_32339468del	NM_000059.4:c.5110_5113del	R1704*	pathogenic
13	32325469	C	T	BRCA2	NC_000013.11:g.32325469C>T	NM_000059.4:c.425+285C>T	?	benign
13	32329790	T	A	BRCA2	NC_000013.11:g.32329790T>A	NM_000059.4:c.681+298T>A	?	benign
13	32379383	C	T	BRCA2	NC_000013.11:g.32379383C>T	NM_000059.4:c.8821C>T	Q2941*	pathogenic
13	32333308	AT	A	BRCA2	NC_000013.11:g.32333309del	NM_000059.4:c.1831del	S611Qfs*3	pathogenic
13	32380069	T	C	BRCA2	NC_000013.11:g.32380069T>C	NM_000059.4:c.9180T>C	F3060=	likely_benign
13	32357786	C	CA	BRCA2	NC_000013.11:g.32357791dup	NM_000059.4:c.7667dup	N2556Kfs*10	pathogenic
13	32333303	C	T	BRCA2	NC_000013.11:g.32333303C>T	NM_000059.4:c.1825C>T	Q609*	pathogenic
13	32339284	A	G	BRCA2	NC_000013.11:g.32339284A>G	NM_000059.4:c.4929A>G	V1643=	likely_benign
13	32337521	C	T	BRCA2	NC_000013.11:g.32337521C>T	NM_000059.4:c.3166C>T	Q1056*	pathogenic
13	32338266	CT	C	BRCA2	NC_000013.11:g.32338270del	NM_000059.4:c.3915del	F1305Lfs*30	pathogenic
13	32333309	TCAGAACTAATT	ATCAG	BRCA2	NC_000013.11:g.32333309_32333320delinsATCAG	NM_000059.4:c.1831_1842delinsATCAG	S611Ifs*31	pathogenic
13	32341102	C	T	BRCA2	NC_000013.11:g.32341102C>T	NM_000059.4:c.6747C>T	A2249=	likely_benign
13	32355092	A	G	BRCA2	NC_000013.11:g.32355092A>G	NM_000059.4:c.7239A>G	K2413=	likely_benign
13	32337718	AG	A	BRCA2	NC_000013.11:g.32337720del	NM_000059.4:c.3365del	G1122Efs*28	pathogenic
13	32340951	CT	C	BRCA2	NC_000013.11:g.32340956del	NM_000059.4:c.6601del	S2201Lfs*5	pathogenic
13	32340069	A	AT	BRCA2	NC_000013.11:g.32340070dup	NM_000059.4:c.5715dup	N1906*	pathogenic
13	32396903	T	C	BRCA2	NC_000013.11:g.32396903T>C	NM_000059.4:c.9507T>C	I3169=	likely_benign
13	32379837	C	A	BRCA2	NC_000013.11:g.32379837C>A	NM_000059.4:c.9041C>A	S3014*	pathogenic
13	32376978	C	T	BRCA2	NC_000013.11:g.32376978C>T	NM_000059.4:c.8754+187C>T	?	benign
13	32338866	TGACCTTCCAGG	T	BRCA2	NC_000013.11:g.32338870_32338880del	NM_000059.4:c.4515_4525del	F1506Tfs*4	pathogenic
13	32354933	T	TCATTTGTATGAACATCTGA	BRCA2	NC_000013.11:g.32354935_32354953dup	NM_000059.4:c.7082_7100dup	L2368Ffs*3	pathogenic
13	32337870	C	T	BRCA2	NC_000013.11:g.32337870C>T	NM_000059.4:c.3515C>T	S1172L	benign
13	32355055	GACCA	G	BRCA2	NC_000013.11:g.32355061_32355064del	NM_000059.4:c.7208_7211del	T2403Kfs*63	pathogenic
13	32357741	G	A	BRCA2	NC_000013.11:g.32357741G>A	NM_000059.4:c.7618-1G>A	?	pathogenic
13	32319154	G	T	BRCA2	NC_000013.11:g.32319154G>T	NM_000059.4:c.145G>T	E49*	pathogenic
13	32394717	C	T	BRCA2	NC_000013.11:g.32394717C>T	NM_000059.4:c.9285C>T	D3095=	likely_benign
13	32356475	A	AT	BRCA2	NC_000013.11:g.32356477dup	NM_000059.4:c.7485dup	K2496*	pathogenic
13	32364237	G	GT	BRCA2	NC_000013.11:g.32364246dup	NM_000059.4:c.8331+713dup	?	benign
13	32363531	AAG	A	BRCA2	NC_000013.11:g.32363532_32363533del	NM_000059.4:c.8330_8331del	K2777Nfs*4	pathogenic
13	32339561	C	T	BRCA2	NC_000013.11:g.32339561C>T	NM_000059.4:c.5206C>T	Q1736*	pathogenic
13	32398224	G	A	BRCA2	NC_000013.11:g.32398224G>A	NM_000059.4:c.9711G>A	R3237=	likely_benign
13	32359789	A	G	BRCA2	NC_000013.11:g.32359789A>G	NM_000059.4:c.7805+1860A>G	?	benign
13	32340645	C	T	BRCA2	NC_000013.11:g.32340645C>T	NM_000059.4:c.6290C>T	T2097M	benign
13	32379896	C	T	BRCA2	NC_000013.11:g.32379896C>T	NM_000059.4:c.9100C>T	Q3034*	pathogenic
13	32332575	T	G	BRCA2	NC_000013.11:g.32332575T>G	NM_000059.4:c.1097T>G	L366*	pathogenic
13	32355063	A	T	BRCA2	NC_000013.11:g.32355063A>T	NM_000059.4:c.7210A>T	K2404*	pathogenic
13	32362640	AT	A	BRCA2	NC_000013.11:g.32362643del	NM_000059.4:c.7926del	F2642Lfs*6	pathogenic
13	32338285	T	C	BRCA2	NC_000013.11:g.32338285T>C	NM_000059.4:c.3930T>C	T1310=	likely_benign
13	32338187	CAT	C	BRCA2	NC_000013.11:g.32338189_32338190del	NM_000059.4:c.3834_3835del	H1278Qfs*2	pathogenic
13	32361348	C	T	BRCA2	NC_000013.11:g.32361348C>T	NM_000059.4:c.7806-1175C>T	?	benign
13	32379388	T	TG	BRCA2	NC_000013.11:g.32379388_32379389insG	NM_000059.4:c.8826_8827insG	Q2943Afs*7	pathogenic
13	32335723	T	C	BRCA2	NC_000013.11:g.32335723T>C	NM_000059.4:c.1910-542T>C	?	benign
13	32355094	C	G	BRCA2	NC_000013.11:g.32355094C>G	NM_000059.4:c.7241C>G	S2414*	pathogenic
13	32338973	GACAAA	G	BRCA2	NC_000013.11:g.32338974_32338978del	NM_000059.4:c.4619_4623del	D1540Gfs*6	pathogenic
13	32354877	C	T	BRCA2	NC_000013.11:g.32354877C>T	NM_000059.4:c.7024C>T	Q2342*	pathogenic
13	32371101	G	A	BRCA2	NC_000013.11:g.32371101G>A	NM_000059.4:c.8632+1G>A	?	pathogenic
13	32340350	G	GT	BRCA2	NC_000013.11:g.32340351dup	NM_000059.4:c.5996dup	F2000Vfs*3	pathogenic
13	32376115	GTGAAA	G	BRCA2	NC_000013.11:g.32376117_32376121del	NM_000059.4:c.8633-553_8633-549del	?	benign
13	32339685	AGAATGTT	A	BRCA2	NC_000013.11:g.32339689_32339695del	NM_000059.4:c.5334_5340del	N1778Kfs*11	pathogenic
13	32396988	T	C	BRCA2	NC_000013.11:g.32396988T>C	NM_000059.4:c.9592T>C	C3198R	benign
13	32363416	T	C	BRCA2	NC_000013.11:g.32363416T>C	NM_000059.4:c.8214T>C	A2738=	likely_benign
13	32396973	ACC	A	BRCA2	NC_000013.11:g.32396976_32396977del	NM_000059.4:c.9580_9581del	P3194Nfs*2	pathogenic
13	32338416	C	T	BRCA2	NC_000013.11:g.32338416C>T	NM_000059.4:c.4061C>T	T1354M	benign
13	32332885	T	TG	BRCA2	NC_000013.11:g.32332886dup	NM_000059.4:c.1408dup	E470Gfs*6	pathogenic
13	32337305	GAAAA	G	BRCA2	NC_000013.11:g.32337309_32337312del	NM_000059.4:c.2954_2957del	K985Ifs*5	pathogenic
13	32340785	GA	G	BRCA2	NC_000013.11:g.32340789del	NM_000059.4:c.6434del	N2145Ifs*23	pathogenic
13	32355076	CACCT	C	BRCA2	NC_000013.11:g.32355077_32355080del	NM_000059.4:c.7224_7227del	P2409Lfs*57	pathogenic
13	32363529	TA	T	BRCA2	NC_000013.11:g.32363532del	NM_000059.4:c.8330del	K2777Rfs*44	pathogenic
13	32340798	C	CT	BRCA2	NC_000013.11:g.32340799dup	NM_000059.4:c.6444dup	I2149Yfs*2	pathogenic
13	32357858	AATACA	CTGATGGTG	BRCA2	NC_000013.11:g.32357858_32357863delinsCTGATGGTG	NM_000059.4:c.7734_7739delinsCTGATGGTG	I2579*	pathogenic
13	32363248	T	TGCAAAAAC	BRCA2	NC_000013.11:g.32363249_32363256dup	NM_000059.4:c.8047_8054dup	L2686Qfs*11	pathogenic
13	32339441	G	GA	BRCA2	NC_000013.11:g.32339441_32339442insA	NM_000059.4:c.5086_5087insA	G1696Efs*4	pathogenic
13	32363440	A	C	BRCA2	NC_000013.11:g.32363440A>C	NM_000059.4:c.8238A>C	T2746=	likely_benign
13	32354888	GA	G	BRCA2	NC_000013.11:g.32354890del	NM_000059.4:c.7037del	N2346Ifs*21	pathogenic
13	32340140	A	G	BRCA2	NC_000013.11:g.32340140A>G	NM_000059.4:c.5785A>G	I1929V	benign
13	32340802	TA	T	BRCA2	NC_000013.11:g.32340805del	NM_000059.4:c.6450del	V2151Ffs*17	pathogenic
13	32380043	CG	C	BRCA2	NC_000013.11:g.32380046del	NM_000059.4:c.9157del	E3053Sfs*9	pathogenic
13	32362572	TG	T	BRCA2	NC_000013.11:g.32362575del	NM_000059.4:c.7858del	V2620Ffs*28	pathogenic
13	32340300	GT	G	BRCA2	NC_000013.11:g.32340301del	NM_000059.4:c.5946del	S1982Rfs*22	pathogenic
13	32333378	G	GTT	BRCA2	NC_000013.11:g.32333378_32333379insTT	NM_000059.4:c.1900_1901insTT	A634Vfs*11	pathogenic
13	32339706	AC	A	BRCA2	NC_000013.11:g.32339707del	NM_000059.4:c.5352del	N1784Kfs*7	pathogenic
13	32319070	T	A	BRCA2	NC_000013.11:g.32319070T>A	NM_000059.4:c.68-7T>A	?	benign
13	32340088	T	C	BRCA2	NC_000013.11:g.32340088T>C	NM_000059.4:c.5733T>C	D1911=	likely_benign
13	32326575	TAGC	AGG	BRCA2	NC_000013.11:g.32326575_32326578delinsAGG	NM_000059.4:c.593_596delinsAGG	L198*	pathogenic
13	32394146	G	A	BRCA2	NC_000013.11:g.32394146G>A	NM_000059.4:c.9257-543G>A	?	benign
13	32339466	GAATA	G	BRCA2	NC_000013.11:g.32339471_32339474del	NM_000059.4:c.5116_5119del	N1706Lfs*5	pathogenic
13	32338329	C	CTGCT	BRCA2	NC_000013.11:g.32338330_32338333dup	NM_000059.4:c.3975_3978dup	A1327Cfs*4	pathogenic
13	32337178	G	A	BRCA2	NC_000013.11:g.32337178G>A	NM_000059.4:c.2823G>A	V941=	likely_benign
13	32326588	C	T	BRCA2	NC_000013.11:g.32326588C>T	NM_000059.4:c.606C>T	P202=	likely_benign
13	32338035	TG	T	BRCA2	NC_000013.11:g.32338036del	NM_000059.4:c.3681del	N1228Mfs*11	pathogenic
13	32356587	C	CTT	BRCA2	NC_000013.11:g.32356587_32356588insTT	NM_000059.4:c.7595_7596insTT	A2534Lfs*18	pathogenic
13	32332311	GC	G	BRCA2	NC_000013.11:g.32332312del	NM_000059.4:c.834del	C279Afs*13	pathogenic
13	32354990	A	G	BRCA2	NC_000013.11:g.32354990A>G	NM_000059.4:c.7137A>G	G2379=	likely_benign
13	32382146	G	A	BRCA2	NC_000013.11:g.32382146G>A	NM_000059.4:c.9256+2001G>A	?	benign
13	32355131	T	A	BRCA2	NC_000013.11:g.32355131T>A	NM_000059.4:c.7278T>A	I2426=	likely_benign
13	32340782	TC	T	BRCA2	NC_000013.11:g.32340783del	NM_000059.4:c.6428del	S2143*	pathogenic
13	32340433	AAG	A	BRCA2	NC_000013.11:g.32340437_32340438del	NM_000059.4:c.6082_6083del	E2028Rfs*20	pathogenic
13	32332489	C	T	BRCA2	NC_000013.11:g.32332489C>T	NM_000059.4:c.1011C>T	N337=	likely_benign
13	32366142	G	A	BRCA2	NC_000013.11:g.32366142G>A	NM_000059.4:c.8331+2609G>A	?	benign
13	32336379	CA	C	BRCA2	NC_000013.11:g.32336380del	NM_000059.4:c.2025del	C676Vfs*6	pathogenic
13	32321537	C	T	BRCA2	NC_000013.11:g.32321537C>T	NM_000059.4:c.316+2212C>T	?	benign
13	32332383	C	CA	BRCA2	NC_000013.11:g.32332383_32332384insA	NM_000059.4:c.905_906insA	S303Lfs*2	pathogenic
13	32339965	CAGTAA	C	BRCA2	NC_000013.11:g.32339971_32339975del	NM_000059.4:c.5616_5620del	K1872Nfs*2	pathogenic
13	32398217	C	CG	BRCA2	NC_000013.11:g.32398217_32398218insG	NM_000059.4:c.9704_9705insG	K3236Qfs*19	pathogenic
13	32370494	T	C	BRCA2	NC_000013.11:g.32370494T>C	NM_000059.4:c.8424T>C	L2808=	likely_benign
13	32337342	T	G	BRCA2	NC_000013.11:g.32337342T>G	NM_000059.4:c.2987T>G	L996R	benign
13	32333330	G	GC	BRCA2	NC_000013.11:g.32333333dup	NM_000059.4:c.1855dup	Q619Pfs*3	pathogenic
13	32357816	T	C	BRCA2	NC_000013.11:g.32357816T>C	NM_000059.4:c.7692T>C	T2564=	likely_benign
13	32363230	GGA	G	BRCA2	NC_000013.11:g.32363231_32363232del	NM_000059.4:c.8029_8030del	E2677Kfs*3	pathogenic
13	32339293	A	G	BRCA2	NC_000013.11:g.32339293A>G	NM_000059.4:c.4938A>G	E1646=	likely_benign
13	32398358	C	CT	BRCA2	NC_000013.11:g.32398359dup	NM_000059.4:c.9846dup	V3283Cfs*2	pathogenic
13	32337689	AC	A	BRCA2	NC_000013.11:g.32337690del	NM_000059.4:c.3335del	T1112Kfs*7	pathogenic
13	32337835	AGATGCTGATCT	A	BRCA2	NC_000013.11:g.32337836_32337846del	NM_000059.4:c.3481_3491del	D1161Sfs*19	pathogenic
13	32338333	T	TTTGC	BRCA2	NC_000013.11:g.32338333_32338334insTTGC	NM_000059.4:c.3978_3979insTTGC	A1327Lfs*4	pathogenic
13	32333271	CATCTT	C	BRCA2	NC_000013.11:g.32333274_32333278del	NM_000059.4:c.1796_1800del	S599*	pathogenic
13	32356498	C	T	BRCA2	NC_000013.11:g.32356498C>T	NM_000059.4:c.7506C>T	R2502=	likely_benign
13	32339503	TG	T	BRCA2	NC_000013.11:g.32339504del	NM_000059.4:c.5149del	E1717Kfs*8	pathogenic
13	32379485	GT	G	BRCA2	NC_000013.11:g.32379486del	NM_000059.4:c.8924del	V2975Efs*13	pathogenic
13	32339902	T	G	BRCA2	NC_000013.11:g.32339902T>G	NM_000059.4:c.5547T>G	G1849=	likely_benign
13	32340347	CAA	C	BRCA2	NC_000013.11:g.32340348_32340349del	NM_000059.4:c.5993_5994del	Q1998Rfs*4	pathogenic
13	32338981	G	GA	BRCA2	NC_000013.11:g.32338986dup	NM_000059.4:c.4631dup	N1544Kfs*4	pathogenic
13	32338306	T	C	BRCA2	NC_000013.11:g.32338306T>C	NM_000059.4:c.3951T>C	T1317=	likely_benign
13	32339560	A	G	BRCA2	NC_000013.11:g.32339560A>G	NM_000059.4:c.5205A>G	K1735=	likely_benign
13	32336317	AC	A	BRCA2	NC_000013.11:g.32336319del	NM_000059.4:c.1964del	P655Qfs*5	pathogenic
13	32320601	G	A	BRCA2	NC_000013.11:g.32320601G>A	NM_000059.4:c.316+1276G>A	?	benign
13	32339355	C	G	BRCA2	NC_000013.11:g.32339355C>G	NM_000059.4:c.5000C>G	S1667*	pathogenic
13	32319210	GA	G	BRCA2	NC_000013.11:g.32319213del	NM_000059.4:c.204del	K68Nfs*12	pathogenic
13	32319271	CT	C	BRCA2	NC_000013.11:g.32319272del	NM_000059.4:c.263del	L88Rfs*8	pathogenic
13	32333089	AAG	A	BRCA2	NC_000013.11:g.32333090_32333091del	NM_000059.4:c.1612_1613del	S538Wfs*21	pathogenic
13	32363404	TCC	T	BRCA2	NC_000013.11:g.32363407_32363408del	NM_000059.4:c.8205_8206del	L2737Sfs*26	pathogenic
13	32337995	G	GT	BRCA2	NC_000013.11:g.32337996dup	NM_000059.4:c.3641dup	F1216Vfs*2	pathogenic
13	32332534	CT	C	BRCA2	NC_000013.11:g.32332535del	NM_000059.4:c.1057del	S353Hfs*14	pathogenic
13	32332777	CAAAA	C	BRCA2	NC_000013.11:g.32332778_32332781del	NM_000059.4:c.1300_1303del	K434Efs*25	pathogenic
13	32378348	A	G	BRCA2	NC_000013.11:g.32378348A>G	NM_000059.4:c.8755-969A>G	?	benign
13	32340006	T	TA	BRCA2	NC_000013.11:g.32340006_32340007insA	NM_000059.4:c.5651_5652insA	C1885Lfs*15	pathogenic
13	32341025	GA	G	BRCA2	NC_000013.11:g.32341028del	NM_000059.4:c.6673del	T2225Qfs*4	pathogenic
13	32368300	T	G	BRCA2	NC_000013.11:g.32368300T>G	NM_000059.4:c.8332-2102T>G	?	benign
13	32319207	A	G	BRCA2	NC_000013.11:g.32319207A>G	NM_000059.4:c.198A>G	Q66=	benign
13	32338374	AT	A	BRCA2	NC_000013.11:g.32338376del	NM_000059.4:c.4021del	S1341Qfs*33	pathogenic
13	32316520	CA	C	BRCA2	NC_000013.11:g.32316523del	NM_000059.4:c.63del	A22Qfs*3	pathogenic
13	32332667	C	CTTAT	BRCA2	NC_000013.11:g.32332667_32332668insTTAT	NM_000059.4:c.1189_1190insTTAT	Q397Lfs*25	pathogenic
13	32341111	T	TC	BRCA2	NC_000013.11:g.32341112dup	NM_000059.4:c.6757dup	L2253Pfs*8	pathogenic
13	32326595	A	ATGAG	BRCA2	NC_000013.11:g.32326595_32326596insTGAG	NM_000059.4:c.613_614insTGAG	S205Mfs*11	pathogenic
13	32371052	CTA	C	BRCA2	NC_000013.11:g.32371053_32371054del	NM_000059.4:c.8585_8586del	L2862Rfs*6	pathogenic
13	32336482	G	C	BRCA2	NC_000013.11:g.32336482G>C	NM_000059.4:c.2127G>C	L709=	benign
13	32370981	T	G	BRCA2	NC_000013.11:g.32370981T>G	NM_000059.4:c.8513T>G	L2838*	pathogenic
13	32339833	CATTAA	C	BRCA2	NC_000013.11:g.32339837_32339841del	NM_000059.4:c.5482_5486del	K1828Vfs*4	pathogenic
13	32339313	C	CT	BRCA2	NC_000013.11:g.32339315dup	NM_000059.4:c.4960dup	C1654Lfs*12	pathogenic
13	32337781	T	C	BRCA2	NC_000013.11:g.32337781T>C	NM_000059.4:c.3426T>C	F1142=	likely_benign
13	32336767	A	G	BRCA2	NC_000013.11:g.32336767A>G	NM_000059.4:c.2412A>G	E804=	likely_benign
13	32339810	C	T	BRCA2	NC_000013.11:g.32339810C>T	NM_000059.4:c.5455C>T	P1819S	benign
13	32319286	TCTCCTGTAAAAGAATTAGATAAATTCAAATTAGACTTAGGTAAGTAATGCAATATGGTAGACTGGGGAGAACTACAAACTAGGAATTTAGGCAAACCTGTGTTAAAATCTTAGCTCATTCATTAATTGTGTCATGCTGGGCAAATCAGTCTCTCTGGCCTCTTTTTCCTCACTCGAAAAATGGAGACGATGAAAATAATGTCTCATAGGTTTGGATTAAATTAAATAATGTAGGTACTTAGTAAATGTTCTCTTTCATCCCTCCTTTGATAAATTTGCCAACTGAGATTTGCTGAATTACGTCTTTCTTATGCCAAAAAAACCTAGGACTTGTTTTGATGTTAATTAAACTAAACTATATTTCTGCAAGCTATCACAGAGGACAGAGATTATTTTACC…	CCAT	BRCA2	NC_000013.11:g.32319286_32324350delinsCCAT	NM_000059.4:c.277_317-726delinsCCAT	?	pathogenic
13	32376755	A	G	BRCA2	NC_000013.11:g.32376755A>G	NM_000059.4:c.8718A>G	E2906=	likely_benign
13	32370465	A	T	BRCA2	NC_000013.11:g.32370465A>T	NM_000059.4:c.8395A>T	R2799*	pathogenic
13	32332901	G	T	BRCA2	NC_000013.11:g.32332901G>T	NM_000059.4:c.1423G>T	E475*	pathogenic
13	32370484	T	TA	BRCA2	NC_000013.11:g.32370485dup	NM_000059.4:c.8415dup	S2806Ifs*6	pathogenic
13	32336881	A	C	BRCA2	NC_000013.11:g.32336881A>C	NM_000059.4:c.2526A>C	V842=	likely_benign
13	32355086	A	AG	BRCA2	NC_000013.11:g.32355086_32355087insG	NM_000059.4:c.7233_7234insG	T2412Dfs*2	pathogenic
13	32337986	G	T	BRCA2	NC_000013.11:g.32337986G>T	NM_000059.4:c.3631G>T	E1211*	pathogenic
13	32378476	T	C	BRCA2	NC_000013.11:g.32378476T>C	NM_000059.4:c.8755-841T>C	?	benign
13	32340054	CAG	C	BRCA2	NC_000013.11:g.32340057_32340058del	NM_000059.4:c.5702_5703del	E1901Gfs*5	pathogenic
13	32355104	CAG	C	BRCA2	NC_000013.11:g.32355107_32355108del	NM_000059.4:c.7254_7255del	R2418Sfs*2	pathogenic
13	32338541	CA	C	BRCA2	NC_000013.11:g.32338543del	NM_000059.4:c.4188del	E1397Kfs*13	pathogenic
13	32330981	T	A	BRCA2	NC_000013.11:g.32330981T>A	NM_000059.4:c.744T>A	A248=	likely_benign
13	32332404	C	A	BRCA2	NC_000013.11:g.32332404C>A	NM_000059.4:c.926C>A	S309*	pathogenic
13	32338942	G	T	BRCA2	NC_000013.11:g.32338942G>T	NM_000059.4:c.4587G>T	G1529=	likely_benign
13	32337118	TTTCAAGAACTCTAC	T	BRCA2	NC_000013.11:g.32337119_32337132del	NM_000059.4:c.2764_2777del	F922Hfs*9	pathogenic
13	32332278	G	GA	BRCA2	NC_000013.11:g.32332283dup	NM_000059.4:c.805dup	T269Nfs*7	pathogenic
13	32326564	GT	G	BRCA2	NC_000013.11:g.32326565del	NM_000059.4:c.583del	S195Qfs*4	pathogenic
13	32339989	C	T	BRCA2	NC_000013.11:g.32339989C>T	NM_000059.4:c.5634C>T	N1878=	likely_benign
13	32351120	C	A	BRCA2	NC_000013.11:g.32351120C>A	NM_000059.4:c.7008-3741C>A	?	benign
13	32337841	TG	T	BRCA2	NC_000013.11:g.32337842del	NM_000059.4:c.3487del	D1163Ifs*5	pathogenic
13	32363522	C	CT	BRCA2	NC_000013.11:g.32363524dup	NM_000059.4:c.8322dup	M2775Yfs*7	pathogenic
13	32326146	G	GA	BRCA2	NC_000013.11:g.32326146_32326147insA	NM_000059.4:c.471_472insA	S158Ifs*25	pathogenic
13	32321240	G	C	BRCA2	NC_000013.11:g.32321240G>C	NM_000059.4:c.316+1915G>C	?	benign
13	32346858	T	C	BRCA2	NC_000013.11:g.32346858T>C	NM_000059.4:c.6969T>C	H2323=	likely_benign
13	32319282	C	G	BRCA2	NC_000013.11:g.32319282C>G	NM_000059.4:c.273C>G	Y91*	pathogenic
13	32370504	G	GC	BRCA2	NC_000013.11:g.32370504_32370505insC	NM_000059.4:c.8434_8435insC	G2812Afs*8	pathogenic
13	32394898	C	T	BRCA2	NC_000013.11:g.32394898C>T	NM_000059.4:c.9466C>T	Q3156*	pathogenic
13	32338321	CAAAT	C	BRCA2	NC_000013.11:g.32338323_32338326del	NM_000059.4:c.3968_3971del	K1323Ifs*11	pathogenic
13	32394454	G	A	BRCA2	NC_000013.11:g.32394454G>A	NM_000059.4:c.9257-235G>A	?	benign
13	32340055	A	G	BRCA2	NC_000013.11:g.32340055A>G	NM_000059.4:c.5700A>G	S1900=	likely_benign
13	32333630	C	T	BRCA2	NC_000013.11:g.32333630C>T	NM_000059.4:c.1909+243C>T	?	benign
13	32340182	TC	T	BRCA2	NC_000013.11:g.32340183del	NM_000059.4:c.5828del	S1943Lfs*20	pathogenic
13	32340420	C	G	BRCA2	NC_000013.11:g.32340420C>G	NM_000059.4:c.6065C>G	S2022*	pathogenic
13	32379401	G	T	BRCA2	NC_000013.11:g.32379401G>T	NM_000059.4:c.8839G>T	E2947*	pathogenic
13	32319180	C	T	BRCA2	NC_000013.11:g.32319180C>T	NM_000059.4:c.171C>T	Y57=	likely_benign
13	32338426	A	C	BRCA2	NC_000013.11:g.32338426A>C	NM_000059.4:c.4071A>C	L1357=	benign
13	32337390	CTTCA	C	BRCA2	NC_000013.11:g.32337391_32337394del	NM_000059.4:c.3036_3039del	S1013Ifs*29	pathogenic
13	32379858	AAAGAGCTAACATACAG	A	BRCA2	NC_000013.11:g.32379859_32379874del	NM_000059.4:c.9063_9078del	E3021Dfs*2	pathogenic
13	32325140	A	G	BRCA2	NC_000013.11:g.32325140A>G	NM_000059.4:c.381A>G	A127=	likely_benign
13	32340366	AAGAT	A	BRCA2	NC_000013.11:g.32340369_32340372del	NM_000059.4:c.6014_6017del	D2005Vfs*34	pathogenic
13	32333065	T	TA	BRCA2	NC_000013.11:g.32333071dup	NM_000059.4:c.1593dup	E532Rfs*3	pathogenic
13	32340334	A	G	BRCA2	NC_000013.11:g.32340334A>G	NM_000059.4:c.5979A>G	L1993=	likely_benign
13	32325869	C	T	BRCA2	NC_000013.11:g.32325869C>T	NM_000059.4:c.426-232C>T	?	benign
13	32338895	G	GCGAT	BRCA2	NC_000013.11:g.32338895_32338896insCGAT	NM_000059.4:c.4540_4541insCGAT	E1514Afs*16	pathogenic
13	32333209	AG	A	BRCA2	NC_000013.11:g.32333211del	NM_000059.4:c.1733del	G578Vfs*2	pathogenic
13	32337010	CA	C	BRCA2	NC_000013.11:g.32337012del	NM_000059.4:c.2657del	N886Mfs*9	pathogenic
13	32366751	C	T	BRCA2	NC_000013.11:g.32366751C>T	NM_000059.4:c.8331+3218C>T	?	benign
13	32340957	CTG	C	BRCA2	NC_000013.11:g.32340958_32340959del	NM_000059.4:c.6603_6604del	D2202Cfs*22	pathogenic
13	32362595	G	A	BRCA2	NC_000013.11:g.32362595G>A	NM_000059.4:c.7878G>A	W2626*	pathogenic
13	32340673	TC	T	BRCA2	NC_000013.11:g.32340675del	NM_000059.4:c.6320del	P2107Lfs*12	pathogenic
13	32340385	C	T	BRCA2	NC_000013.11:g.32340385C>T	NM_000059.4:c.6030C>T	V2010=	likely_benign
13	32379885	CA	C	BRCA2	NC_000013.11:g.32379893del	NM_000059.4:c.9097del	T3033Lfs*29	pathogenic
13	32339709	C	CT	BRCA2	NC_000013.11:g.32339710dup	NM_000059.4:c.5355dup	S1786*	pathogenic
13	32337677	A	T	BRCA2	NC_000013.11:g.32337677A>T	NM_000059.4:c.3322A>T	K1108*	pathogenic
13	32363217	T	TA	BRCA2	NC_000013.11:g.32363223dup	NM_000059.4:c.8021dup	I2675Dfs*6	pathogenic
13	32339570	TATTTAAGTAACAGTAGC	T	BRCA2	NC_000013.11:g.32339573_32339589del	NM_000059.4:c.5218_5234del	L1740Vfs*2	pathogenic
13	32376742	C	CAG	BRCA2	NC_000013.11:g.32376745_32376746dup	NM_000059.4:c.8708_8709dup	L2904Sfs*6	pathogenic
13	32394717	C	CG	BRCA2	NC_000013.11:g.32394718dup	NM_000059.4:c.9286dup	E3096Gfs*15	pathogenic
13	32319111	A	G	BRCA2	NC_000013.11:g.32319111A>G	NM_000059.4:c.102A>G	E34=	likely_benign
13	32356799	G	A	BRCA2	NC_000013.11:g.32356799G>A	NM_000059.4:c.7617+190G>A	?	benign
13	32333228	AAAAAG	A	BRCA2	NC_000013.11:g.32333233_32333237del	NM_000059.4:c.1755_1759del	K585Nfs*3	pathogenic
13	32339561	CA	C	BRCA2	NC_000013.11:g.32339563del	NM_000059.4:c.5208del	D1737Ifs*4	pathogenic
13	32340929	ATGGAAAT	A	BRCA2	NC_000013.11:g.32340933_32340939del	NM_000059.4:c.6578_6584del	E2193Vfs*11	pathogenic
13	32356501	C	T	BRCA2	NC_000013.11:g.32356501C>T	NM_000059.4:c.7509C>T	V2503=	likely_benign
13	32333222	A	C	BRCA2	NC_000013.11:g.32333222A>C	NM_000059.4:c.1744A>C	T582P	benign
13	32332832	C	T	BRCA2	NC_000013.11:g.32332832C>T	NM_000059.4:c.1354C>T	L452=	likely_benign
13	32370462	C	CCTAG	BRCA2	NC_000013.11:g.32370463_32370466dup	NM_000059.4:c.8393_8396dup	R2799Sfs*2	pathogenic
13	32333234	A	T	BRCA2	NC_000013.11:g.32333234A>T	NM_000059.4:c.1756A>T	K586*	pathogenic
13	32332276	T	TG	BRCA2	NC_000013.11:g.32332278dup	NM_000059.4:c.800dup	T269Nfs*7	pathogenic
13	32336963	A	AT	BRCA2	NC_000013.11:g.32336966dup	NM_000059.4:c.2611dup	S871Ffs*10	pathogenic
13	32332100	G	C	BRCA2	NC_000013.11:g.32332100G>C	NM_000059.4:c.794-172G>C	?	benign
13	32394782	A	AT	BRCA2	NC_000013.11:g.32394783dup	NM_000059.4:c.9351dup	M3118Yfs*32	pathogenic
13	32370443	A	G	BRCA2	NC_000013.11:g.32370443A>G	NM_000059.4:c.8373A>G	K2791=	likely_benign
13	32349324	A	C	BRCA2	NC_000013.11:g.32349324A>C	NM_000059.4:c.7007+2428A>C	?	benign
13	32380142	A	AC	BRCA2	NC_000013.11:g.32380143dup	NM_000059.4:c.9254dup	G3086Rfs*25	pathogenic
13	32371060	C	CT	BRCA2	NC_000013.11:g.32371062dup	NM_000059.4:c.8594dup	L2865Ffs*4	pathogenic
13	32326151	G	A	BRCA2	NC_000013.11:g.32326151G>A	NM_000059.4:c.475+1G>A	?	pathogenic
13	32337908	ACAGTTGAAAT	A	BRCA2	NC_000013.11:g.32337909_32337918del	NM_000059.4:c.3554_3563del	T1185Ifs*9	pathogenic
13	32332724	AT	A	BRCA2	NC_000013.11:g.32332727del	NM_000059.4:c.1249del	S417Lfs*13	pathogenic
13	32319117	TTCAG	T	BRCA2	NC_000013.11:g.32319118_32319121del	NM_000059.4:c.109_112del	S37Kfs*42	pathogenic
13	32363356	T	C	BRCA2	NC_000013.11:g.32363356T>C	NM_000059.4:c.8154T>C	I2718=	likely_benign
13	32374083	T	G	BRCA2	NC_000013.11:g.32374083T>G	NM_000059.4:c.8633-2587T>G	?	benign
13	32338140	C	G	BRCA2	NC_000013.11:g.32338140C>G	NM_000059.4:c.3785C>G	S1262*	pathogenic
13	32338542	A	G	BRCA2	NC_000013.11:g.32338542A>G	NM_000059.4:c.4187A>G	Q1396R	benign
13	32356607	C	T	BRCA2	NC_000013.11:g.32356607C>T	NM_000059.4:c.7615C>T	Q2539*	pathogenic
13	32333266	T	C	BRCA2	NC_000013.11:g.32333266T>C	NM_000059.4:c.1788T>C	D596=	benign
13	32356578	GC	G	BRCA2	NC_000013.11:g.32356580del	NM_000059.4:c.7588del	Q2530Kfs*21	pathogenic
13	32340532	TA	T	BRCA2	NC_000013.11:g.32340533del	NM_000059.4:c.6178del	T2060Qfs*10	pathogenic
13	32367440	GA	G	BRCA2	NC_000013.11:g.32367450del	NM_000059.4:c.8332-2952del	?	benign
13	32337102	GT	G	BRCA2	NC_000013.11:g.32337103del	NM_000059.4:c.2748del	C916Wfs*2	pathogenic
13	32353467	CTA	C	BRCA2	NC_000013.11:g.32353468_32353469del	NM_000059.4:c.7008-1393_7008-1392del	?	benign
13	32339594	A	AT	BRCA2	NC_000013.11:g.32339594_32339595insT	NM_000059.4:c.5239_5240insT	N1747Ifs*8	pathogenic
13	32337648	AT	A	BRCA2	NC_000013.11:g.32337650del	NM_000059.4:c.3295del	S1099Qfs*5	pathogenic
13	32338291	T	C	BRCA2	NC_000013.11:g.32338291T>C	NM_000059.4:c.3936T>C	N1312=	likely_benign
13	32379845	AAAAGT	A	BRCA2	NC_000013.11:g.32379849_32379853del	NM_000059.4:c.9053_9057del	S3018Ifs*2	pathogenic
13	32340816	ATC	A	BRCA2	NC_000013.11:g.32340823_32340824del	NM_000059.4:c.6468_6469del	Q2157Ifs*18	pathogenic
13	32337557	G	GTATAATTGCAGTCAATTAA	BRCA2	NC_000013.11:g.32337560_32337561insAATTGCAGTCAATTAATAT	NM_000059.4:c.3205_3206insAATTGCAGTCAATTAATAT	S1069*	pathogenic
13	32340997	T	TC	BRCA2	NC_000013.11:g.32340997_32340998insC	NM_000059.4:c.6642_6643insC	Y2215Lfs*10	pathogenic
13	32337948	ATGAC	A	BRCA2	NC_000013.11:g.32337951_32337954del	NM_000059.4:c.3596_3599del	D1199Vfs*9	pathogenic
13	32340349	A	G	BRCA2	NC_000013.11:g.32340349A>G	NM_000059.4:c.5994A>G	Q1998=	likely_benign
13	32328310	C	T	BRCA2	NC_000013.11:g.32328310C>T	NM_000059.4:c.632-1133C>T	?	benign
13	32340191	T	TA	BRCA2	NC_000013.11:g.32340191_32340192insA	NM_000059.4:c.5836_5837insA	S1946Yfs*4	pathogenic
13	32336967	C	TTT	BRCA2	NC_000013.11:g.32336967delinsTTT	NM_000059.4:c.2612delinsTTT	S871Ffs*2	pathogenic
13	32339734	TG	T	BRCA2	NC_000013.11:g.32339735del	NM_000059.4:c.5380del	V1794*	pathogenic
13	32316508	GACACGCTGCA	G	BRCA2	NC_000013.11:g.32316512_32316521del	NM_000059.4:c.52_61del	R18Kfs*4	pathogenic
13	32338446	T	TAA	BRCA2	NC_000013.11:g.32338447_32338448insAA	NM_000059.4:c.4092_4093insAA	C1365Nfs*10	pathogenic
13	32330979	GC	G	BRCA2	NC_000013.11:g.32330980del	NM_000059.4:c.743del	A248Vfs*3	pathogenic
13	32337267	T	G	BRCA2	NC_000013.11:g.32337267T>G	NM_000059.4:c.2912T>G	L971*	pathogenic
13	32340399	T	A	BRCA2	NC_000013.11:g.32340399T>A	NM_000059.4:c.6044T>A	L2015*	pathogenic
13	32337695	CT	C	BRCA2	NC_000013.11:g.32337698del	NM_000059.4:c.3343del	S1115Lfs*4	pathogenic
13	32340304	A	G	BRCA2	NC_000013.11:g.32340304A>G	NM_000059.4:c.5949A>G	G1983=	likely_benign
13	32340297	CA	C	BRCA2	NC_000013.11:g.32340299del	NM_000059.4:c.5944del	S1982Vfs*22	pathogenic
13	32336449	A	G	BRCA2	NC_000013.11:g.32336449A>G	NM_000059.4:c.2094A>G	L698=	likely_benign
13	32338574	GA	G	BRCA2	NC_000013.11:g.32338576del	NM_000059.4:c.4221del	E1407Dfs*3	pathogenic
13	32337992	GA	G	BRCA2	NC_000013.11:g.32337994del	NM_000059.4:c.3639del	V1214Wfs*14	pathogenic
13	32396972	C	T	BRCA2	NC_000013.11:g.32396972C>T	NM_000059.4:c.9576C>T	S3192=	likely_benign
13	32340703	CTG	C	BRCA2	NC_000013.11:g.32340707_32340708del	NM_000059.4:c.6352_6353del	V2118Kfs*10	pathogenic
13	32363397	T	A	BRCA2	NC_000013.11:g.32363397T>A	NM_000059.4:c.8195T>A	L2732*	pathogenic
13	32332644	C	A	BRCA2	NC_000013.11:g.32332644C>A	NM_000059.4:c.1166C>A	P389Q	benign
13	32332764	T	G	BRCA2	NC_000013.11:g.32332764T>G	NM_000059.4:c.1286T>G	L429*	pathogenic
13	32340663	C	G	BRCA2	NC_000013.11:g.32340663C>G	NM_000059.4:c.6308C>G	S2103*	pathogenic
13	32332483	A	G	BRCA2	NC_000013.11:g.32332483A>G	NM_000059.4:c.1005A>G	E335=	likely_benign
13	32338208	GAAAA	G	BRCA2	NC_000013.11:g.32338212_32338215del	NM_000059.4:c.3857_3860del	K1286Ifs*6	pathogenic
13	32332771	A	G	BRCA2	NC_000013.11:g.32332771A>G	NM_000059.4:c.1293A>G	T431=	likely_benign
13	32330656	G	GT	BRCA2	NC_000013.11:g.32330665dup	NM_000059.4:c.682-254dup	?	benign
13	32363250	CA	C	BRCA2	NC_000013.11:g.32363255del	NM_000059.4:c.8053del	T2685Hfs*9	pathogenic
13	32319099	T	C	BRCA2	NC_000013.11:g.32319099T>C	NM_000059.4:c.90T>C	N30=	likely_benign
13	32332381	T	TA	BRCA2	NC_000013.11:g.32332382dup	NM_000059.4:c.904dup	T302Nfs*3	pathogenic
13	32355038	C	CT	BRCA2	NC_000013.11:g.32355040dup	NM_000059.4:c.7187dup	L2396Ffs*16	pathogenic
13	32340499	T	TA	BRCA2	NC_000013.11:g.32340499_32340500insA	NM_000059.4:c.6144_6145insA	V2049Sfs*11	pathogenic
13	32396599	G	C	BRCA2	NC_000013.11:g.32396599G>C	NM_000059.4:c.9502-299G>C	?	benign
13	32339620	G	A	BRCA2	NC_000013.11:g.32339620G>A	NM_000059.4:c.5265G>A	E1755=	likely_benign
13	32341018	C	CAAAG	BRCA2	NC_000013.11:g.32341018_32341019insAAAG	NM_000059.4:c.6663_6664insAAAG	Y2222Kfs*4	pathogenic
13	32338738	C	CT	BRCA2	NC_000013.11:g.32338740dup	NM_000059.4:c.4385dup	L1462Ffs*4	pathogenic
13	32332892	C	T	BRCA2	NC_000013.11:g.32332892C>T	NM_000059.4:c.1414C>T	Q472*	pathogenic
13	32340071	AAC	A	BRCA2	NC_000013.11:g.32340072_32340073del	NM_000059.4:c.5717_5718del	N1906Ifs*4	pathogenic
13	32398388	C	T	BRCA2	NC_000013.11:g.32398388C>T	NM_000059.4:c.9875C>T	P3292L	benign
13	32319283	C	T	BRCA2	NC_000013.11:g.32319283C>T	NM_000059.4:c.274C>T	Q92*	pathogenic
13	32340571	C	G	BRCA2	NC_000013.11:g.32340571C>G	NM_000059.4:c.6216C>G	S2072=	likely_benign
13	32337070	T	TA	BRCA2	NC_000013.11:g.32337071dup	NM_000059.4:c.2716dup	T906Nfs*2	pathogenic
13	32318080	C	T	BRCA2	NC_000013.11:g.32318080C>T	NM_000059.4:c.68-997C>T	?	benign
13	32367646	T	G	BRCA2	NC_000013.11:g.32367646T>G	NM_000059.4:c.8332-2756T>G	?	benign
13	32373717	C	G	BRCA2	NC_000013.11:g.32373717C>G	NM_000059.4:c.8632+2617C>G	?	benign
13	32340811	TC	T	BRCA2	NC_000013.11:g.32340813del	NM_000059.4:c.6458del	P2153Hfs*15	pathogenic
13	32332319	GAC	G	BRCA2	NC_000013.11:g.32332320_32332321del	NM_000059.4:c.842_843del	D281Afs*13	pathogenic
13	32346884	GT	G	BRCA2	NC_000013.11:g.32346885del	NM_000059.4:c.6996del	C2332Wfs*35	pathogenic
13	32359222	G	A	BRCA2	NC_000013.11:g.32359222G>A	NM_000059.4:c.7805+1293G>A	?	benign
13	32362691	C	A	BRCA2	NC_000013.11:g.32362691C>A	NM_000059.4:c.7974C>A	Y2658*	pathogenic
13	32339421	CAAAA	C	BRCA2	NC_000013.11:g.32339425_32339428del	NM_000059.4:c.5070_5073del	K1690Nfs*15	pathogenic
13	32316609	C	G	BRCA2	NC_000013.11:g.32316609C>G	NM_000059.4:c.67+82C>G	?	benign
13	32317569	A	G	BRCA2	NC_000013.11:g.32317569A>G	NM_000059.4:c.67+1042A>G	?	benign
13	32338824	TACTG	T	BRCA2	NC_000013.11:g.32338826_32338829del	NM_000059.4:c.4471_4474del	L1491Kfs*12	pathogenic
13	32380043	C	T	BRCA2	NC_000013.11:g.32380043C>T	NM_000059.4:c.9154C>T	R3052W	pathogenic
13	32332595	C	T	BRCA2	NC_000013.11:g.32332595C>T	NM_000059.4:c.1117C>T	Q373*	pathogenic
13	32339568	CT	C	BRCA2	NC_000013.11:g.32339570del	NM_000059.4:c.5215del	Y1739Ifs*2	pathogenic
13	32340556	C	A	BRCA2	NC_000013.11:g.32340556C>A	NM_000059.4:c.6201C>A	S2067=	likely_benign
13	32338021	T	G	BRCA2	NC_000013.11:g.32338021T>G	NM_000059.4:c.3666T>G	A1222=	likely_benign
13	32394900	A	G	BRCA2	NC_000013.11:g.32394900A>G	NM_000059.4:c.9468A>G	Q3156=	likely_benign
13	32356476	T	TA	BRCA2	NC_000013.11:g.32356476_32356477insA	NM_000059.4:c.7484_7485insA	K2496*	pathogenic
13	32338906	AG	A	BRCA2	NC_000013.11:g.32338907del	NM_000059.4:c.4552del	E1518Nfs*25	pathogenic
13	32316484	GC	G	BRCA2	NC_000013.11:g.32316486del	NM_000059.4:c.26del	P9Qfs*16	pathogenic
13	32337521	CAAAA	C	BRCA2	NC_000013.11:g.32337522_32337525del	NM_000059.4:c.3167_3170del	Q1056Rfs*3	pathogenic
13	32354884	T	TA	BRCA2	NC_000013.11:g.32354885dup	NM_000059.4:c.7032dup	Q2345Tfs*15	pathogenic
13	32332504	A	G	BRCA2	NC_000013.11:g.32332504A>G	NM_000059.4:c.1026A>G	E342=	likely_benign
13	32356550	C	T	BRCA2	NC_000013.11:g.32356550C>T	NM_000059.4:c.7558C>T	R2520*	pathogenic
13	32376689	T	G	BRCA2	NC_000013.11:g.32376689T>G	NM_000059.4:c.8652T>G	Y2884*	pathogenic
13	32340200	GA	G	BRCA2	NC_000013.11:g.32340201del	NM_000059.4:c.5846del	D1949Vfs*14	pathogenic
13	32356530	CA	C	BRCA2	NC_000013.11:g.32356535del	NM_000059.4:c.7543del	T2515Hfs*9	pathogenic
13	32340622	GCA	G	BRCA2	NC_000013.11:g.32340623_32340624del	NM_000059.4:c.6268_6269del	H2090*	pathogenic
13	32330949	GA	G	BRCA2	NC_000013.11:g.32330952del	NM_000059.4:c.715del	S239Vfs*2	pathogenic
13	32388666	C	CT	BRCA2	NC_000013.11:g.32388679dup	NM_000059.4:c.9257-6010dup	?	benign
13	32340264	C	A	BRCA2	NC_000013.11:g.32340264C>A	NM_000059.4:c.5909C>A	S1970*	pathogenic
13	32355005	A	G	BRCA2	NC_000013.11:g.32355005A>G	NM_000059.4:c.7152A>G	Q2384=	likely_benign
13	32332795	TCTTA	T	BRCA2	NC_000013.11:g.32332799_32332802del	NM_000059.4:c.1321_1324del	T441Qfs*18	pathogenic
13	32376866	A	G	BRCA2	NC_000013.11:g.32376866A>G	NM_000059.4:c.8754+75A>G	?	benign
13	32363485	T	C	BRCA2	NC_000013.11:g.32363485T>C	NM_000059.4:c.8283T>C	S2761=	likely_benign
13	32340998	T	TA	BRCA2	NC_000013.11:g.32340999dup	NM_000059.4:c.6644dup	Y2215*	pathogenic
13	32332369	AACAGTTGT	GATACTTCAG	BRCA2	NC_000013.11:g.32332369_32332377delinsGATACTTCAG	NM_000059.4:c.891_899delinsGATACTTCAG	T298Ifs*7	pathogenic
13	32338283	AC	A	BRCA2	NC_000013.11:g.32338284del	NM_000059.4:c.3929del	T1310Mfs*25	pathogenic
13	32330949	G	GA	BRCA2	NC_000013.11:g.32330952dup	NM_000059.4:c.715dup	S239Kfs*6	pathogenic
13	32336536	A	G	BRCA2	NC_000013.11:g.32336536A>G	NM_000059.4:c.2181A>G	S727=	likely_benign
13	32355006	G	GT	BRCA2	NC_000013.11:g.32355009dup	NM_000059.4:c.7156dup	S2386Ffs*6	pathogenic
13	32336560	TG	T	BRCA2	NC_000013.11:g.32336561del	NM_000059.4:c.2206del	A736Qfs*36	pathogenic
13	32340055	A	C	BRCA2	NC_000013.11:g.32340055A>C	NM_000059.4:c.5700A>C	S1900=	likely_benign
13	32337574	G	A	BRCA2	NC_000013.11:g.32337574G>A	NM_000059.4:c.3219G>A	Q1073=	likely_benign
13	32332689	AT	A	BRCA2	NC_000013.11:g.32332690del	NM_000059.4:c.1212del	N404Kfs*26	pathogenic
13	32362635	AAGGAATTTGC	A	BRCA2	NC_000013.11:g.32362636_32362645del	NM_000059.4:c.7919_7928del	K2640Ifs*5	pathogenic
13	32332603	C	T	BRCA2	NC_000013.11:g.32332603C>T	NM_000059.4:c.1125C>T	P375=	likely_benign
13	32338169	A	AC	BRCA2	NC_000013.11:g.32338169_32338170insC	NM_000059.4:c.3814_3815insC	M1272Tfs*3	pathogenic
13	32342652	A	G	BRCA2	NC_000013.11:g.32342652A>G	NM_000059.4:c.6841+1456A>G	?	benign
13	32380123	C	T	BRCA2	NC_000013.11:g.32380123C>T	NM_000059.4:c.9234C>T	V3078=	benign
13	32367486	A	G	BRCA2	NC_000013.11:g.32367486A>G	NM_000059.4:c.8332-2916A>G	?	benign
13	32363289	T	A	BRCA2	NC_000013.11:g.32363289T>A	NM_000059.4:c.8087T>A	L2696*	pathogenic
13	32398464	G	A	BRCA2	NC_000013.11:g.32398464G>A	NM_000059.4:c.9951G>A	L3317=	likely_benign
13	32319210	G	GA	BRCA2	NC_000013.11:g.32319213dup	NM_000059.4:c.204dup	P69Tfs*4	pathogenic
13	32323151	ATT	A	BRCA2	NC_000013.11:g.32323168_32323169del	NM_000059.4:c.317-1908_317-1907del	?	benign
13	32371034	GA	C	BRCA2	NC_000013.11:g.32371034_32371035delinsC	NM_000059.4:c.8566_8567delinsC	E2856Rfs*7	pathogenic
13	32337907	TAC	T	BRCA2	NC_000013.11:g.32337909_32337910del	NM_000059.4:c.3554_3555del	T1185Sfs*2	pathogenic
13	32337126	ACT	A	BRCA2	NC_000013.11:g.32337129_32337130del	NM_000059.4:c.2774_2775del	S925Yfs*10	pathogenic
13	32334492	A	G	BRCA2	NC_000013.11:g.32334492A>G	NM_000059.4:c.1909+1105A>G	?	benign
13	32326516	A	G	BRCA2	NC_000013.11:g.32326516A>G	NM_000059.4:c.534A>G	K178=	likely_benign
13	32361504	G	A	BRCA2	NC_000013.11:g.32361504G>A	NM_000059.4:c.7806-1019G>A	?	benign
13	32339551	C	CT	BRCA2	NC_000013.11:g.32339552dup	NM_000059.4:c.5197dup	S1733Ffs*10	pathogenic
13	32337740	C	CA	BRCA2	NC_000013.11:g.32337741dup	NM_000059.4:c.3386dup	F1130Vfs*2	pathogenic
13	32337173	C	T	BRCA2	NC_000013.11:g.32337173C>T	NM_000059.4:c.2818C>T	Q940*	pathogenic
13	32332666	T	G	BRCA2	NC_000013.11:g.32332666T>G	NM_000059.4:c.1188T>G	S396=	likely_benign
13	32326609	C	T	BRCA2	NC_000013.11:g.32326609C>T	NM_000059.4:c.627C>T	L209=	likely_benign
13	32338969	T	C	BRCA2	NC_000013.11:g.32338969T>C	NM_000059.4:c.4614T>C	S1538=	likely_benign
13	32391514	T	C	BRCA2	NC_000013.11:g.32391514T>C	NM_000059.4:c.9257-3175T>C	?	benign
13	32340623	CAT	C	BRCA2	NC_000013.11:g.32340625_32340626del	NM_000059.4:c.6270_6271del	H2090Qfs*9	pathogenic
13	32363384	G	A	BRCA2	NC_000013.11:g.32363384G>A	NM_000059.4:c.8182G>A	V2728I	benign
13	32340433	A	G	BRCA2	NC_000013.11:g.32340433A>G	NM_000059.4:c.6078A>G	T2026=	likely_benign
13	32337688	T	A	BRCA2	NC_000013.11:g.32337688T>A	NM_000059.4:c.3333T>A	I1111=	likely_benign
13	32340202	TGTTA	T	BRCA2	NC_000013.11:g.32340206_32340209del	NM_000059.4:c.5851_5854del	S1951Wfs*11	pathogenic
13	32332934	C	T	BRCA2	NC_000013.11:g.32332934C>T	NM_000059.4:c.1456C>T	Q486*	pathogenic
13	32339060	TAC	T	BRCA2	NC_000013.11:g.32339062_32339063del	NM_000059.4:c.4707_4708del	Y1569*	pathogenic
13	32340629	CTTCACTA	C	BRCA2	NC_000013.11:g.32340635_32340641del	NM_000059.4:c.6280_6286del	Y2094Lfs*23	pathogenic
13	32355063	AAAGTCT	TG	BRCA2	NC_000013.11:g.32355063_32355069delinsTG	NM_000059.4:c.7210_7216delinsTG	K2404Cfs*6	pathogenic
13	32362235	G	A	BRCA2	NC_000013.11:g.32362235G>A	NM_000059.4:c.7806-288G>A	?	benign
13	32354156	A	G	BRCA2	NC_000013.11:g.32354156A>G	NM_000059.4:c.7008-705A>G	?	benign
13	32340382	A	G	BRCA2	NC_000013.11:g.32340382A>G	NM_000059.4:c.6027A>G	Q2009=	likely_benign
13	32380135	GA	G	BRCA2	NC_000013.11:g.32380142del	NM_000059.4:c.9253del	T3085Qfs*19	pathogenic
13	32355077	A	G	BRCA2	NC_000013.11:g.32355077A>G	NM_000059.4:c.7224A>G	P2408=	likely_benign
13	32340556	C	CA	BRCA2	NC_000013.11:g.32340557dup	NM_000059.4:c.6202dup	I2068Nfs*10	pathogenic
13	32340896	G	T	BRCA2	NC_000013.11:g.32340896G>T	NM_000059.4:c.6541G>T	G2181*	pathogenic
13	32394843	T	G	BRCA2	NC_000013.11:g.32394843T>G	NM_000059.4:c.9411T>G	T3137=	benign
13	32337372	GA	G	BRCA2	NC_000013.11:g.32337373del	NM_000059.4:c.3018del	G1007Vfs*36	pathogenic
13	32340051	ATTCAGAGGATATTC	A	BRCA2	NC_000013.11:g.32340056_32340069del	NM_000059.4:c.5701_5714del	E1901*	pathogenic
13	32398431	C	A	BRCA2	NC_000013.11:g.32398431C>A	NM_000059.4:c.9918C>A	T3306=	likely_benign
13	32362604	G	GAA	BRCA2	NC_000013.11:g.32362606_32362607dup	NM_000059.4:c.7889_7890dup	L2631Nfs*18	pathogenic
13	32339884	A	C	BRCA2	NC_000013.11:g.32339884A>C	NM_000059.4:c.5529A>C	A1843=	benign
13	32394803	A	T	BRCA2	NC_000013.11:g.32394803A>T	NM_000059.4:c.9371A>T	N3124I	pathogenic
13	32398381	GT	G	BRCA2	NC_000013.11:g.32398384del	NM_000059.4:c.9871del	S3291Lfs*22	pathogenic
13	32379376	T	C	BRCA2	NC_000013.11:g.32379376T>C	NM_000059.4:c.8814T>C	D2938=	likely_benign
13	32368808	T	G	BRCA2	NC_000013.11:g.32368808T>G	NM_000059.4:c.8332-1594T>G	?	benign
13	32327768	A	AT	BRCA2	NC_000013.11:g.32327782dup	NM_000059.4:c.631+1169dup	?	benign
13	32337458	G	T	BRCA2	NC_000013.11:g.32337458G>T	NM_000059.4:c.3103G>T	E1035*	pathogenic
13	32332750	A	G	BRCA2	NC_000013.11:g.32332750A>G	NM_000059.4:c.1272A>G	S424=	likely_benign
13	32388418	G	A	BRCA2	NC_000013.11:g.32388418G>A	NM_000059.4:c.9257-6271G>A	?	benign
13	32363376	GGTATGCTGTTA	TT	BRCA2	NC_000013.11:g.32363376_32363387delinsTT	NM_000059.4:c.8174_8185delinsTT	W2725Ffs*5	pathogenic
13	32340798	CT	C	BRCA2	NC_000013.11:g.32340799del	NM_000059.4:c.6444del	I2149Lfs*19	pathogenic
13	32339305	TC	T	BRCA2	NC_000013.11:g.32339307del	NM_000059.4:c.4952del	P1651Lfs*19	pathogenic
13	32338518	CTT	C	BRCA2	NC_000013.11:g.32338523_32338524del	NM_000059.4:c.4168_4169del	L1390Gfs*12	pathogenic
13	32379894	C	CA	BRCA2	NC_000013.11:g.32379894_32379895insA	NM_000059.4:c.9098_9099insA	Q3034Sfs*10	pathogenic
13	32326553	GAT	G	BRCA2	NC_000013.11:g.32326556_32326557del	NM_000059.4:c.574_575del	M192Vfs*13	pathogenic
13	32336957	AC	A	BRCA2	NC_000013.11:g.32336958del	NM_000059.4:c.2603del	T868Ifs*6	pathogenic
13	32379884	AC	A	BRCA2	NC_000013.11:g.32379885del	NM_000059.4:c.9089del	T3030Kfs*32	pathogenic
13	32340377	A	T	BRCA2	NC_000013.11:g.32340377A>T	NM_000059.4:c.6022A>T	K2008*	pathogenic
13	32332992	T	C	BRCA2	NC_000013.11:g.32332992T>C	NM_000059.4:c.1514T>C	I505T	benign
13	32357786	C	CAA	BRCA2	NC_000013.11:g.32357790_32357791dup	NM_000059.4:c.7666_7667dup	N2556Kfs*93	pathogenic
13	32332782	GAA	G	BRCA2	NC_000013.11:g.32332784_32332785del	NM_000059.4:c.1306_1307del	K436Efs*15	pathogenic
13	32337797	C	T	BRCA2	NC_000013.11:g.32337797C>T	NM_000059.4:c.3442C>T	Q1148*	pathogenic
13	32326576	A	AGCTAC	BRCA2	NC_000013.11:g.32326577_32326581dup	NM_000059.4:c.595_599dup	P201Lfs*12	pathogenic
13	32362691	C	G	BRCA2	NC_000013.11:g.32362691C>G	NM_000059.4:c.7974C>G	Y2658*	pathogenic
13	32340722	GA	G	BRCA2	NC_000013.11:g.32340728del	NM_000059.4:c.6373del	T2125Pfs*12	pathogenic
13	32316463	G	A	BRCA2	NC_000013.11:g.32316463G>A	NM_000059.4:c.3G>A	Met1?	pathogenic
13	32350832	C	T	BRCA2	NC_000013.11:g.32350832C>T	NM_000059.4:c.7007+3936C>T	?	benign
13	32337187	A	ATT	BRCA2	NC_000013.11:g.32337187_32337188insTT	NM_000059.4:c.2832_2833insTT	K945Lfs*16	pathogenic
13	32340268	T	C	BRCA2	NC_000013.11:g.32340268T>C	NM_000059.4:c.5913T>C	S1971=	likely_benign
13	32355095	A	T	BRCA2	NC_000013.11:g.32355095A>T	NM_000059.4:c.7242A>T	S2414=	likely_benign
13	32338752	T	A	BRCA2	NC_000013.11:g.32338752T>A	NM_000059.4:c.4397T>A	L1466*	pathogenic
13	32340498	A	T	BRCA2	NC_000013.11:g.32340498A>T	NM_000059.4:c.6143A>T	N2048I	benign
13	32336277	C	CAT	BRCA2	NC_000013.11:g.32336277_32336278insAT	NM_000059.4:c.1922_1923insAT	S642Ffs*3	pathogenic
13	32371043	C	T	BRCA2	NC_000013.11:g.32371043C>T	NM_000059.4:c.8575C>T	Q2859*	pathogenic
13	32332680	C	G	BRCA2	NC_000013.11:g.32332680C>G	NM_000059.4:c.1202C>G	S401*	pathogenic
13	32337843	AT	A	BRCA2	NC_000013.11:g.32337844del	NM_000059.4:c.3489del	L1164Ffs*4	pathogenic
13	32385103	C	A	BRCA2	NC_000013.11:g.32385103C>A	NM_000059.4:c.9256+4958C>A	?	benign
13	32345389	A	T	BRCA2	NC_000013.11:g.32345389A>T	NM_000059.4:c.6937+736A>T	?	benign
13	32333017	A	AG	BRCA2	NC_000013.11:g.32333018dup	NM_000059.4:c.1540dup	E514Gfs*13	pathogenic
13	32354896	AT	A	BRCA2	NC_000013.11:g.32354900del	NM_000059.4:c.7047del	F2349Lfs*18	pathogenic
13	32338903	CAAAG	C	BRCA2	NC_000013.11:g.32338906_32338909del	NM_000059.4:c.4551_4554del	K1517Nfs*25	pathogenic
13	32328257	T	C	BRCA2	NC_000013.11:g.32328257T>C	NM_000059.4:c.632-1186T>C	?	benign
13	32363497	T	A	BRCA2	NC_000013.11:g.32363497T>A	NM_000059.4:c.8295T>A	C2765*	pathogenic
13	32340450	C	CT	BRCA2	NC_000013.11:g.32340451dup	NM_000059.4:c.6096dup	I2033Yfs*16	pathogenic
13	32340131	AGT	A	BRCA2	NC_000013.11:g.32340133_32340134del	NM_000059.4:c.5778_5779del	S1926Rfs*7	pathogenic
13	32355140	G	A	BRCA2	NC_000013.11:g.32355140G>A	NM_000059.4:c.7287G>A	E2429=	likely_benign
13	32336972	A	AT	BRCA2	NC_000013.11:g.32336973dup	NM_000059.4:c.2618dup	T874Nfs*7	pathogenic
13	32337274	G	A	BRCA2	NC_000013.11:g.32337274G>A	NM_000059.4:c.2919G>A	S973=	benign
13	32339705	AA	T	BRCA2	NC_000013.11:g.32339705_32339706delinsT	NM_000059.4:c.5350_5351delinsT	N1784Sfs*7	pathogenic
13	32336581	A	G	BRCA2	NC_000013.11:g.32336581A>G	NM_000059.4:c.2226A>G	Q742=	likely_benign
13	32340132	GT	G	BRCA2	NC_000013.11:g.32340133del	NM_000059.4:c.5778del	S1926Rfs*37	pathogenic
13	32370444	CTTGGATTCTT	AGG	BRCA2	NC_000013.11:g.32370444_32370454delinsAGG	NM_000059.4:c.8374_8384delinsAGG	L2792Rfs*3	pathogenic
13	32340728	AC	G	BRCA2	NC_000013.11:g.32340728_32340729delinsG	NM_000059.4:c.6373_6374delinsG	T2125Afs*12	pathogenic
13	32316497	G	GT	BRCA2	NC_000013.11:g.32316497_32316498insT	NM_000059.4:c.37_38insT	E13Vfs*4	pathogenic
13	32340940	TAA	T	BRCA2	NC_000013.11:g.32340943_32340944del	NM_000059.4:c.6588_6589del	K2196Nfs*2	pathogenic
13	32334687	AG	A	BRCA2	NC_000013.11:g.32334688del	NM_000059.4:c.1909+1301del	?	benign
13	32396905	A	G	BRCA2	NC_000013.11:g.32396905A>G	NM_000059.4:c.9509A>G	D3170G	benign
13	32332439	C	T	BRCA2	NC_000013.11:g.32332439C>T	NM_000059.4:c.961C>T	Q321*	pathogenic
13	32379502	AG	A	BRCA2	NC_000013.11:g.32379503del	NM_000059.4:c.8941del	E2981Kfs*7	pathogenic
13	32363270	G	GTT	BRCA2	NC_000013.11:g.32363272_32363273dup	NM_000059.4:c.8070_8071dup	S2691Ffs*4	pathogenic
13	32319170	AC	A	BRCA2	NC_000013.11:g.32319171del	NM_000059.4:c.162del	N54Kfs*26	pathogenic
13	32336586	C	A	BRCA2	NC_000013.11:g.32336586C>A	NM_000059.4:c.2231C>A	S744*	pathogenic
13	32338988	CT	C	BRCA2	NC_000013.11:g.32338993del	NM_000059.4:c.4638del	F1546Lfs*22	pathogenic
13	32371029	AT	A	BRCA2	NC_000013.11:g.32371030del	NM_000059.4:c.8562del	Y2854*	pathogenic
13	32340557	AT	A	BRCA2	NC_000013.11:g.32340561del	NM_000059.4:c.6206del	L2069*	pathogenic
13	32338034	CTGAA	C	BRCA2	NC_000013.11:g.32338037_32338040del	NM_000059.4:c.3682_3685del	N1228Ffs*10	pathogenic
13	32363449	G	A	BRCA2	NC_000013.11:g.32363449G>A	NM_000059.4:c.8247G>A	Q2749=	likely_benign
13	32340721	G	GGAAA	BRCA2	NC_000013.11:g.32340722_32340725dup	NM_000059.4:c.6367_6370dup	K2124Rfs*6	pathogenic
13	32338614	A	AT	BRCA2	NC_000013.11:g.32338618dup	NM_000059.4:c.4263dup	E1422*	pathogenic
13	32332522	G	A	BRCA2	NC_000013.11:g.32332522G>A	NM_000059.4:c.1044G>A	V348=	likely_benign
13	32357798	G	GAAAC	BRCA2	NC_000013.11:g.32357798_32357799insAAAC	NM_000059.4:c.7674_7675insAAAC	S2559Kfs*8	pathogenic
13	32398356	A	G	BRCA2	NC_000013.11:g.32398356A>G	NM_000059.4:c.9843A>G	P3281=	benign
13	32394708	T	G	BRCA2	NC_000013.11:g.32394708T>G	NM_000059.4:c.9276T>G	Y3092*	pathogenic
13	32363198	A	T	BRCA2	NC_000013.11:g.32363198A>T	NM_000059.4:c.7996A>T	R2666*	pathogenic
13	32340196	T	C	BRCA2	NC_000013.11:g.32340196T>C	NM_000059.4:c.5841T>C	P1947=	likely_benign
13	32330960	G	GA	BRCA2	NC_000013.11:g.32330965dup	NM_000059.4:c.728dup	N243Kfs*2	pathogenic
13	32340932	G	GA	BRCA2	NC_000013.11:g.32340935dup	NM_000059.4:c.6580dup	I2194Nfs*3	pathogenic
13	32387447	C	T	BRCA2	NC_000013.11:g.32387447C>T	NM_000059.4:c.9257-7242C>T	?	benign
13	32396954	A	G	BRCA2	NC_000013.11:g.32396954A>G	NM_000059.4:c.9558A>G	A3186=	likely_benign
13	32332714	C	T	BRCA2	NC_000013.11:g.32332714C>T	NM_000059.4:c.1236C>T	P412=	likely_benign
13	32363229	TG	T	BRCA2	NC_000013.11:g.32363231del	NM_000059.4:c.8029del	E2677Kfs*17	pathogenic
13	32336620	C	T	BRCA2	NC_000013.11:g.32336620C>T	NM_000059.4:c.2265C>T	S755=	likely_benign
13	32363449	GA	G	BRCA2	NC_000013.11:g.32363451del	NM_000059.4:c.8249del	K2750Rfs*27	pathogenic
13	32337529	AC	A	BRCA2	NC_000013.11:g.32337530del	NM_000059.4:c.3175del	L1059*	pathogenic
13	32338027	C	T	BRCA2	NC_000013.11:g.32338027C>T	NM_000059.4:c.3672C>T	G1224=	likely_benign
13	32356530	C	CA	BRCA2	NC_000013.11:g.32356535dup	NM_000059.4:c.7543dup	T2515Nfs*24	pathogenic
13	32316473	TC	T	BRCA2	NC_000013.11:g.32316475del	NM_000059.4:c.15del	E7Rfs*18	pathogenic
13	32337659	A	T	BRCA2	NC_000013.11:g.32337659A>T	NM_000059.4:c.3304A>T	N1102Y	benign
13	32337995	GT	G	BRCA2	NC_000013.11:g.32337996del	NM_000059.4:c.3641del	V1214Gfs*14	pathogenic
13	32337160	TA	T	BRCA2	NC_000013.11:g.32337163del	NM_000059.4:c.2808del	K936Nfs*24	pathogenic
13	32340301	TG	T	BRCA2	NC_000013.11:g.32340303del	NM_000059.4:c.5948del	G1983Efs*21	pathogenic
13	32338879	A	T	BRCA2	NC_000013.11:g.32338879A>T	NM_000059.4:c.4524A>T	G1508=	likely_benign
13	32315655	A	G	BRCA2	NC_000013.11:g.32315655A>G	NM_000059.4:c.-52A>G	?	benign
13	32339850	C	CT	BRCA2	NC_000013.11:g.32339851dup	NM_000059.4:c.5496dup	N1833*	pathogenic
13	32333310	C	G	BRCA2	NC_000013.11:g.32333310C>G	NM_000059.4:c.1832C>G	S611*	pathogenic
13	32337421	TA	T	BRCA2	NC_000013.11:g.32337423del	NM_000059.4:c.3068del	N1023Tfs*20	pathogenic
13	32337208	T	G	BRCA2	NC_000013.11:g.32337208T>G	NM_000059.4:c.2853T>G	L951=	likely_benign
13	32346896	G	A	BRCA2	NC_000013.11:g.32346896G>A	NM_000059.4:c.7007G>A	R2336H	pathogenic
13	32339049	A	AGACC	BRCA2	NC_000013.11:g.32339050_32339053dup	NM_000059.4:c.4695_4698dup	L1567Dfs*9	pathogenic
13	32338889	CG	C	BRCA2	NC_000013.11:g.32338890del	NM_000059.4:c.4535del	R1512Lfs*31	pathogenic
13	32337006	C	G	BRCA2	NC_000013.11:g.32337006C>G	NM_000059.4:c.2651C>G	S884*	pathogenic
13	32339620	GGTAT	G	BRCA2	NC_000013.11:g.32339621_32339624del	NM_000059.4:c.5266_5269del	V1756Ifs*20	pathogenic
13	32340847	GT	G	BRCA2	NC_000013.11:g.32340849del	NM_000059.4:c.6494del	L2165Wfs*3	pathogenic
13	32336845	C	T	BRCA2	NC_000013.11:g.32336845C>T	NM_000059.4:c.2490C>T	N830=	likely_benign
13	32340816	ATCTC	A	BRCA2	NC_000013.11:g.32340821_32340824del	NM_000059.4:c.6466_6469del	S2156Nfs*11	pathogenic
13	32337546	CAATT	C	BRCA2	NC_000013.11:g.32337550_32337553del	NM_000059.4:c.3195_3198del	N1066Lfs*10	pathogenic
13	32362594	G	GGATC	BRCA2	NC_000013.11:g.32362595_32362598dup	NM_000059.4:c.7878_7881dup	I2628Dfs*14	pathogenic
13	32339607	AC	A	BRCA2	NC_000013.11:g.32339609del	NM_000059.4:c.5254del	H1752Ifs*25	pathogenic
13	32388964	T	G	BRCA2	NC_000013.11:g.32388964T>G	NM_000059.4:c.9257-5725T>G	?	benign
13	32340445	T	TA	BRCA2	NC_000013.11:g.32340446dup	NM_000059.4:c.6091dup	T2031Nfs*18	pathogenic
13	32326520	AT	A	BRCA2	NC_000013.11:g.32326523del	NM_000059.4:c.541del	S181Lfs*4	pathogenic
13	32319327	T	C	BRCA2	NC_000013.11:g.32319327T>C	NM_000059.4:c.316+2T>C	?	pathogenic
13	32372283	A	G	BRCA2	NC_000013.11:g.32372283A>G	NM_000059.4:c.8632+1183A>G	?	benign
13	32338466	C	T	BRCA2	NC_000013.11:g.32338466C>T	NM_000059.4:c.4111C>T	Q1371*	pathogenic
13	32340516	CT	C	BRCA2	NC_000013.11:g.32340519del	NM_000059.4:c.6164del	F2055Sfs*15	pathogenic
13	32337731	G	T	BRCA2	NC_000013.11:g.32337731G>T	NM_000059.4:c.3376G>T	E1126*	pathogenic
13	32337530	CTG	C	BRCA2	NC_000013.11:g.32337531_32337532del	NM_000059.4:c.3176_3177del	L1059Qfs*7	pathogenic
13	32339947	CAT	C	BRCA2	NC_000013.11:g.32339950_32339951del	NM_000059.4:c.5595_5596del	F1866Yfs*6	pathogenic
13	32399599	AT	A	BRCA2	NC_000013.11:g.32399609del	NM_000059.4:c.*839del	?	benign
13	32341040	G	T	BRCA2	NC_000013.11:g.32341040G>T	NM_000059.4:c.6685G>T	E2229*	pathogenic
13	32338672	CAA	C	BRCA2	NC_000013.11:g.32338674_32338675del	NM_000059.4:c.4319_4320del	K1440Rfs*4	pathogenic
13	32356455	G	GAT	BRCA2	NC_000013.11:g.32356456_32356457insTA	NM_000059.4:c.7464_7465insTA	D2489*	pathogenic
13	32398437	C	A	BRCA2	NC_000013.11:g.32398437C>A	NM_000059.4:c.9924C>A	Y3308*	pathogenic
13	32339456	C	T	BRCA2	NC_000013.11:g.32339456C>T	NM_000059.4:c.5101C>T	Q1701*	pathogenic
13	32337555	CT	C	BRCA2	NC_000013.11:g.32337556del	NM_000059.4:c.3201del	V1068Yfs*9	pathogenic
13	32337556	TG	T	BRCA2	NC_000013.11:g.32337557del	NM_000059.4:c.3202del	V1068Yfs*9	pathogenic
13	32319165	TAA	T	BRCA2	NC_000013.11:g.32319169_32319170del	NM_000059.4:c.160_161del	N54Qfs*9	pathogenic
13	32370548	C	G	BRCA2	NC_000013.11:g.32370548C>G	NM_000059.4:c.8478C>G	Y2826*	pathogenic
13	32326589	AC	A	BRCA2	NC_000013.11:g.32326592del	NM_000059.4:c.610del	S205Vfs*6	pathogenic
13	32379904	A	G	BRCA2	NC_000013.11:g.32379904A>G	NM_000059.4:c.9108A>G	Q3036=	likely_benign
13	32338490	CAGATT	C	BRCA2	NC_000013.11:g.32338492_32338496del	NM_000059.4:c.4137_4141del	I1380Rfs*21	pathogenic
13	32379883	G	A	BRCA2	NC_000013.11:g.32379883G>A	NM_000059.4:c.9087G>A	A3029=	likely_benign
13	32336999	CT	C	BRCA2	NC_000013.11:g.32337003del	NM_000059.4:c.2648del	F883Sfs*12	pathogenic
13	32336586	CA	C	BRCA2	NC_000013.11:g.32336590del	NM_000059.4:c.2235del	V746Wfs*26	pathogenic
13	32333181	C	CG	BRCA2	NC_000013.11:g.32333181_32333182insG	NM_000059.4:c.1703_1704insG	Q569Tfs*21	pathogenic
13	32339909	G	GT	BRCA2	NC_000013.11:g.32339912dup	NM_000059.4:c.5557dup	C1853Lfs*5	pathogenic
13	32338235	T	C	BRCA2	NC_000013.11:g.32338235T>C	NM_000059.4:c.3880T>C	L1294=	likely_benign
13	32373524	A	T	BRCA2	NC_000013.11:g.32373524A>T	NM_000059.4:c.8632+2424A>T	?	benign
13	32319284	A	ACCAT	BRCA2	NC_000013.11:g.32319284_32319285insCCAT	NM_000059.4:c.275_276insCCAT	Q92Hfs*10	pathogenic
13	32336785	CA	C	BRCA2	NC_000013.11:g.32336790del	NM_000059.4:c.2435del	N812Ifs*13	pathogenic
13	32360422	C	T	BRCA2	NC_000013.11:g.32360422C>T	NM_000059.4:c.7806-2101C>T	?	benign
13	32332842	CAG	C	BRCA2	NC_000013.11:g.32332846_32332847del	NM_000059.4:c.1368_1369del	K457Afs*4	pathogenic
13	32362663	C	CA	BRCA2	NC_000013.11:g.32362664dup	NM_000059.4:c.7947dup	E2650Rfs*12	pathogenic
13	32341162	TG	T	BRCA2	NC_000013.11:g.32341164del	NM_000059.4:c.6809del	G2270Efs*10	pathogenic
13	32362522	G	GGA	BRCA2	NC_000013.11:g.32362523_32362524insAG	NM_000059.4:c.7806_7807insAG	A2603Rfs*46	pathogenic
13	32363194	T	A	BRCA2	NC_000013.11:g.32363194T>A	NM_000059.4:c.7992T>A	I2664=	likely_benign
13	32319274	CCG	C	BRCA2	NC_000013.11:g.32319276_32319277del	NM_000059.4:c.267_268del	L90Vfs*10	pathogenic
13	32338042	TTC	T	BRCA2	NC_000013.11:g.32338044_32338045del	NM_000059.4:c.3689_3690del	S1230Yfs*2	pathogenic
13	32337804	CTA	C	BRCA2	NC_000013.11:g.32337806_32337807del	NM_000059.4:c.3451_3452del	I1151Lfs*6	pathogenic
13	32394816	A	AG	BRCA2	NC_000013.11:g.32394816_32394817insG	NM_000059.4:c.9384_9385insG	P3129Afs*21	pathogenic
13	32339652	AT	A	BRCA2	NC_000013.11:g.32339653del	NM_000059.4:c.5298del	N1766Kfs*11	pathogenic
13	32339266	T	TA	BRCA2	NC_000013.11:g.32339269dup	NM_000059.4:c.4914dup	V1639Sfs*3	pathogenic
13	32332979	ATCAAAAAG	A	BRCA2	NC_000013.11:g.32332982_32332989del	NM_000059.4:c.1504_1511del	K502Yfs*9	pathogenic
13	32376795	A	G	BRCA2	NC_000013.11:g.32376795A>G	NM_000059.4:c.8754+4A>G	?	pathogenic
13	32332378	A	AG	BRCA2	NC_000013.11:g.32332379dup	NM_000059.4:c.901dup	D301Gfs*4	pathogenic
13	32355152	A	G	BRCA2	NC_000013.11:g.32355152A>G	NM_000059.4:c.7299A>G	Q2433=	likely_benign
13	32380686	A	C	BRCA2	NC_000013.11:g.32380686A>C	NM_000059.4:c.9256+541A>C	?	benign
13	32380109	C	T	BRCA2	NC_000013.11:g.32380109C>T	NM_000059.4:c.9220C>T	L3074=	likely_benign
13	32337236	C	T	BRCA2	NC_000013.11:g.32337236C>T	NM_000059.4:c.2881C>T	Q961*	pathogenic
13	32356462	AC	A	BRCA2	NC_000013.11:g.32356463del	NM_000059.4:c.7471del	Q2491Rfs*33	pathogenic
13	32337943	GA	G	BRCA2	NC_000013.11:g.32337948del	NM_000059.4:c.3593del	N1198Mfs*11	pathogenic
13	32327292	A	AC	BRCA2	NC_000013.11:g.32327292_32327293insC	NM_000059.4:c.631+679_631+680insC	?	benign
13	32340005	AT	A	BRCA2	NC_000013.11:g.32340008del	NM_000059.4:c.5653del	C1885Afs*24	pathogenic
13	32339402	CAGACTTCATTACTTGA	C	BRCA2	NC_000013.11:g.32339405_32339420del	NM_000059.4:c.5050_5065del	T1684Qfs*17	pathogenic
13	32370453	TTTCCTGACCCTA	T	BRCA2	NC_000013.11:g.32370454_32370465del	NM_000059.4:c.8384_8395del	F2795*	pathogenic
13	32379475	GT	G	BRCA2	NC_000013.11:g.32379477del	NM_000059.4:c.8915del	L2972Cfs*4	pathogenic
13	32363211	CGGCTATAAAAAAGATAATGGAAA	C	BRCA2	NC_000013.11:g.32363214_32363236del	NM_000059.4:c.8012_8034del	A2671Gfs*2	pathogenic
13	32319268	ACT	A	BRCA2	NC_000013.11:g.32319271_32319272del	NM_000059.4:c.262_263del	L88Afs*12	pathogenic
13	32333331	C	CA	BRCA2	NC_000013.11:g.32333331_32333332insA	NM_000059.4:c.1853_1854insA	Q619Pfs*3	pathogenic
13	32340216	CTT	C	BRCA2	NC_000013.11:g.32340217_32340218del	NM_000059.4:c.5862_5863del	S1955Rfs*4	pathogenic
13	32375563	C	CT	BRCA2	NC_000013.11:g.32375577dup	NM_000059.4:c.8633-1093dup	?	benign
13	32338860	A	AT	BRCA2	NC_000013.11:g.32338860_32338861insT	NM_000059.4:c.4505_4506insT	Q1502Hfs*12	pathogenic
13	32394795	T	C	BRCA2	NC_000013.11:g.32394795T>C	NM_000059.4:c.9363T>C	A3121=	likely_benign
13	32398462	C	T	BRCA2	NC_000013.11:g.32398462C>T	NM_000059.4:c.9949C>T	L3317=	likely_benign
13	32370408	GCTAA	G	BRCA2	NC_000013.11:g.32370410_32370413del	NM_000059.4:c.8340_8343del	N2781Vfs*39	pathogenic
13	32366208	C	A	BRCA2	NC_000013.11:g.32366208C>A	NM_000059.4:c.8331+2675C>A	?	benign
13	32337845	C	CT	BRCA2	NC_000013.11:g.32337847dup	NM_000059.4:c.3492dup	H1165Sfs*19	pathogenic
13	32359219	C	A	BRCA2	NC_000013.11:g.32359219C>A	NM_000059.4:c.7805+1290C>A	?	benign
13	32363182	T	G	BRCA2	NC_000013.11:g.32363182T>G	NM_000059.4:c.7980T>G	Y2660*	pathogenic
13	32336222	T	C	BRCA2	NC_000013.11:g.32336222T>C	NM_000059.4:c.1910-43T>C	?	benign
13	32398186	T	TA	BRCA2	NC_000013.11:g.32398187dup	NM_000059.4:c.9674dup	Y3225*	pathogenic
13	32338486	C	CTGAGGA	BRCA2	NC_000013.11:g.32338486_32338487insTGAGGA	NM_000059.4:c.4131_4132insTGAGGA	T1378*	pathogenic
13	32336892	C	CA	BRCA2	NC_000013.11:g.32336894dup	NM_000059.4:c.2539dup	R847Kfs*34	pathogenic
13	32331128	G	A	BRCA2	NC_000013.11:g.32331128G>A	NM_000059.4:c.793+98G>A	?	benign
13	32394884	AAG	A	BRCA2	NC_000013.11:g.32394887_32394888del	NM_000059.4:c.9455_9456del	E3152Gfs*15	pathogenic
13	32333065	T	CA	BRCA2	NC_000013.11:g.32333065delinsCA	NM_000059.4:c.1587delinsCA	E532Rfs*3	pathogenic
13	32319285	A	G	BRCA2	NC_000013.11:g.32319285A>G	NM_000059.4:c.276A>G	Q92=	likely_benign
13	32340378	A	AG	BRCA2	NC_000013.11:g.32340379dup	NM_000059.4:c.6024dup	Q2009Afs*9	pathogenic
13	32339482	TTATG	T	BRCA2	NC_000013.11:g.32339485_32339488del	NM_000059.4:c.5130_5133del	Y1710*	pathogenic
13	32326574	TTAGC	T	BRCA2	NC_000013.11:g.32326577_32326580del	NM_000059.4:c.595_598del	A199Hfs*11	pathogenic
13	32339547	ATC	A	BRCA2	NC_000013.11:g.32339552_32339553del	NM_000059.4:c.5197_5198del	S1733Rfs*9	pathogenic
13	32319205	C	T	BRCA2	NC_000013.11:g.32319205C>T	NM_000059.4:c.196C>T	Q66*	pathogenic
13	32337910	A	G	BRCA2	NC_000013.11:g.32337910A>G	NM_000059.4:c.3555A>G	T1185=	likely_benign
13	32370998	G	GA	BRCA2	NC_000013.11:g.32371001dup	NM_000059.4:c.8533dup	R2845Kfs*24	pathogenic
13	32338037	A	G	BRCA2	NC_000013.11:g.32338037A>G	NM_000059.4:c.3682A>G	N1228D	benign
13	32340320	T	TC	BRCA2	NC_000013.11:g.32340321dup	NM_000059.4:c.5966dup	D1990Rfs*13	pathogenic
13	32338675	A	G	BRCA2	NC_000013.11:g.32338675A>G	NM_000059.4:c.4320A>G	K1440=	likely_benign
13	32340975	CA	C	BRCA2	NC_000013.11:g.32340978del	NM_000059.4:c.6623del	N2208Ifs*2	pathogenic
13	32331778	T	C	BRCA2	NC_000013.11:g.32331778T>C	NM_000059.4:c.794-494T>C	?	benign
13	32339680	A	G	BRCA2	NC_000013.11:g.32339680A>G	NM_000059.4:c.5325A>G	V1775=	likely_benign
13	32357771	C	A	BRCA2	NC_000013.11:g.32357771C>A	NM_000059.4:c.7647C>A	C2549*	pathogenic
13	32370972	CA	C	BRCA2	NC_000013.11:g.32370973del	NM_000059.4:c.8505del	S2836Lfs*27	pathogenic
13	32332631	A	T	BRCA2	NC_000013.11:g.32332631A>T	NM_000059.4:c.1153A>T	K385*	pathogenic
13	32319111	ACTTTCTT	A	BRCA2	NC_000013.11:g.32319113_32319119del	NM_000059.4:c.104_110del	L35Qfs*43	pathogenic
13	32333146	TTTAA	T	BRCA2	NC_000013.11:g.32333149_32333152del	NM_000059.4:c.1671_1674del	D559Mfs*13	pathogenic
13	32325460	AAGTC	A	BRCA2	NC_000013.11:g.32325465_32325468del	NM_000059.4:c.425+281_425+284del	?	benign
13	32385743	A	G	BRCA2	NC_000013.11:g.32385743A>G	NM_000059.4:c.9256+5598A>G	?	benign
13	32394698	C	CT	BRCA2	NC_000013.11:g.32394701dup	NM_000059.4:c.9269dup	V3091Rfs*20	pathogenic
13	32338394	G	GT	BRCA2	NC_000013.11:g.32338397dup	NM_000059.4:c.4042dup	C1348Lfs*4	pathogenic
13	32376413	C	A	BRCA2	NC_000013.11:g.32376413C>A	NM_000059.4:c.8633-257C>A	?	benign
13	32354957	G	A	BRCA2	NC_000013.11:g.32354957G>A	NM_000059.4:c.7104G>A	L2368=	likely_benign
13	32328764	A	G	BRCA2	NC_000013.11:g.32328764A>G	NM_000059.4:c.632-679A>G	?	benign
13	32338565	TC	T	BRCA2	NC_000013.11:g.32338566del	NM_000059.4:c.4211del	S1404*	pathogenic
13	32337085	TG	T	BRCA2	NC_000013.11:g.32337086del	NM_000059.4:c.2731del	E911Kfs*4	pathogenic
13	32320188	A	C	BRCA2	NC_000013.11:g.32320188A>C	NM_000059.4:c.316+863A>C	?	benign
13	32330969	TAGATTTATCGCTTCTGTGAC	T	BRCA2	NC_000013.11:g.32330973_32330992del	NM_000059.4:c.736_755del	F246Qfs*2	pathogenic
13	32396981	TA	T	BRCA2	NC_000013.11:g.32396984del	NM_000059.4:c.9588del	D3197Tfs*20	pathogenic
13	32391627	C	T	BRCA2	NC_000013.11:g.32391627C>T	NM_000059.4:c.9257-3062C>T	?	benign
13	32338024	T	C	BRCA2	NC_000013.11:g.32338024T>C	NM_000059.4:c.3669T>C	H1223=	likely_benign
13	32332738	C	T	BRCA2	NC_000013.11:g.32332738C>T	NM_000059.4:c.1260C>T	D420=	likely_benign
13	32340714	CAG	C	BRCA2	NC_000013.11:g.32340716_32340717del	NM_000059.4:c.6361_6362del	E2121Nfs*7	pathogenic
13	32332629	C	T	BRCA2	NC_000013.11:g.32332629C>T	NM_000059.4:c.1151C>T	S384F	benign
13	32398566	T	C	BRCA2	NC_000013.11:g.32398566T>C	NM_000059.4:c.10053T>C	A3351=	likely_benign
13	32332375	T	C	BRCA2	NC_000013.11:g.32332375T>C	NM_000059.4:c.897T>C	V299=	likely_benign
13	32340321	C	A	BRCA2	NC_000013.11:g.32340321C>A	NM_000059.4:c.5966C>A	S1989*	pathogenic
13	32376771	G	A	BRCA2	NC_000013.11:g.32376771G>A	NM_000059.4:c.8734G>A	A2912T	benign
13	32340340	C	CA	BRCA2	NC_000013.11:g.32340340_32340341insA	NM_000059.4:c.5985_5986insA	A1996Sfs*7	pathogenic
13	32336641	T	C	BRCA2	NC_000013.11:g.32336641T>C	NM_000059.4:c.2286T>C	D762=	likely_benign
13	32333072	GAAACT	G	BRCA2	NC_000013.11:g.32333073_32333077del	NM_000059.4:c.1595_1599del	E532Gfs*4	pathogenic
13	32332573	A	AT	BRCA2	NC_000013.11:g.32332575dup	NM_000059.4:c.1097dup	L366Ffs*12	pathogenic
13	32330978	C	T	BRCA2	NC_000013.11:g.32330978C>T	NM_000059.4:c.741C>T	I247=	likely_benign
13	32333183	CAG	C	BRCA2	NC_000013.11:g.32333185_32333186del	NM_000059.4:c.1707_1708del	N570Ffs*19	pathogenic
13	32340258	C	CA	BRCA2	NC_000013.11:g.32340259dup	NM_000059.4:c.5904dup	V1969Sfs*11	pathogenic
13	32363528	TTAAAG	T	BRCA2	NC_000013.11:g.32363529_32363533del	NM_000059.4:c.8327_8331del	L2776Yfs*4	pathogenic
13	32319180	C	A	BRCA2	NC_000013.11:g.32319180C>A	NM_000059.4:c.171C>A	Y57*	pathogenic
13	32380042	A	G	BRCA2	NC_000013.11:g.32380042A>G	NM_000059.4:c.9153A>G	P3051=	likely_benign
13	32356516	C	CA	BRCA2	NC_000013.11:g.32356517dup	NM_000059.4:c.7525dup	S2509Kfs*30	pathogenic
13	32340890	G	GA	BRCA2	NC_000013.11:g.32340890_32340891insA	NM_000059.4:c.6535_6536insA	V2179Dfs*10	pathogenic
13	32396969	G	A	BRCA2	NC_000013.11:g.32396969G>A	NM_000059.4:c.9573G>A	W3191*	pathogenic
13	32394713	C	G	BRCA2	NC_000013.11:g.32394713C>G	NM_000059.4:c.9281C>G	S3094*	pathogenic
13	32337234	AG	A	BRCA2	NC_000013.11:g.32337235del	NM_000059.4:c.2880del	K960Nfs*4	pathogenic
13	32377317	C	T	BRCA2	NC_000013.11:g.32377317C>T	NM_000059.4:c.8754+526C>T	?	benign
13	32376753	GAA	G	BRCA2	NC_000013.11:g.32376754_32376755del	NM_000059.4:c.8717_8718del	E2906Gfs*12	pathogenic
13	32340183	CTA	C	BRCA2	NC_000013.11:g.32340184_32340185del	NM_000059.4:c.5829_5830del	K1944Nfs*5	pathogenic
13	32339332	C	T	BRCA2	NC_000013.11:g.32339332C>T	NM_000059.4:c.4977C>T	S1659=	likely_benign
13	32356588	C	T	BRCA2	NC_000013.11:g.32356588C>T	NM_000059.4:c.7596C>T	P2532=	likely_benign
13	32333385	C	G	BRCA2	NC_000013.11:g.32333385C>G	NM_000059.4:c.1907C>G	S636*	pathogenic
13	32340906	AG	A	BRCA2	NC_000013.11:g.32340908del	NM_000059.4:c.6553del	A2185Lfs*6	pathogenic
13	32394701	TC	T	BRCA2	NC_000013.11:g.32394702del	NM_000059.4:c.9270del	F3090Lfs*14	pathogenic
13	32340855	T	A	BRCA2	NC_000013.11:g.32340855T>A	NM_000059.4:c.6500T>A	L2167*	pathogenic
13	32363194	T	C	BRCA2	NC_000013.11:g.32363194T>C	NM_000059.4:c.7992T>C	I2664=	likely_benign
13	32394771	T	C	BRCA2	NC_000013.11:g.32394771T>C	NM_000059.4:c.9339T>C	I3113=	likely_benign
13	32358600	T	C	BRCA2	NC_000013.11:g.32358600T>C	NM_000059.4:c.7805+671T>C	?	benign
13	32332710	T	TA	BRCA2	NC_000013.11:g.32332711dup	NM_000059.4:c.1233dup	P412Tfs*9	pathogenic
13	32338613	G	T	BRCA2	NC_000013.11:g.32338613G>T	NM_000059.4:c.4258G>T	D1420Y	benign
13	32338217	AAT	A	BRCA2	NC_000013.11:g.32338219_32338220del	NM_000059.4:c.3864_3865del	N1288Kfs*9	pathogenic
13	32325137	A	G	BRCA2	NC_000013.11:g.32325137A>G	NM_000059.4:c.378A>G	Q126=	likely_benign
13	32348329	C	T	BRCA2	NC_000013.11:g.32348329C>T	NM_000059.4:c.7007+1433C>T	?	benign
13	32357862	C	T	BRCA2	NC_000013.11:g.32357862C>T	NM_000059.4:c.7738C>T	Q2580*	pathogenic
13	32336621	C	T	BRCA2	NC_000013.11:g.32336621C>T	NM_000059.4:c.2266C>T	Q756*	pathogenic
13	32379784	A	G	BRCA2	NC_000013.11:g.32379784A>G	NM_000059.4:c.8988A>G	L2996=	likely_benign
13	32354903	C	T	BRCA2	NC_000013.11:g.32354903C>T	NM_000059.4:c.7050C>T	T2350=	likely_benign
13	32332645	G	A	BRCA2	NC_000013.11:g.32332645G>A	NM_000059.4:c.1167G>A	P389=	likely_benign
13	32330162	A	G	BRCA2	NC_000013.11:g.32330162A>G	NM_000059.4:c.681+670A>G	?	benign
13	32339985	AC	A	BRCA2	NC_000013.11:g.32339986del	NM_000059.4:c.5631del	N1877Kfs*32	pathogenic
13	32341105	A	G	BRCA2	NC_000013.11:g.32341105A>G	NM_000059.4:c.6750A>G	T2250=	likely_benign
13	32379463	A	G	BRCA2	NC_000013.11:g.32379463A>G	NM_000059.4:c.8901A>G	T2967=	likely_benign
13	32338947	AAGTT	A	BRCA2	NC_000013.11:g.32338949_32338952del	NM_000059.4:c.4594_4597del	V1532Kfs*10	pathogenic
13	32398259	C	CT	BRCA2	NC_000013.11:g.32398261dup	NM_000059.4:c.9748dup	S3250Ffs*5	pathogenic
13	32363866	A	G	BRCA2	NC_000013.11:g.32363866A>G	NM_000059.4:c.8331+333A>G	?	benign
13	32371012	AAAGG	A	BRCA2	NC_000013.11:g.32371016_32371019del	NM_000059.4:c.8548_8551del	E2850Qfs*12	pathogenic
13	32338669	C	T	BRCA2	NC_000013.11:g.32338669C>T	NM_000059.4:c.4314C>T	V1438=	likely_benign
13	32336268	T	G	BRCA2	NC_000013.11:g.32336268T>G	NM_000059.4:c.1913T>G	L638*	pathogenic
13	32355085	A	C	BRCA2	NC_000013.11:g.32355085A>C	NM_000059.4:c.7232A>C	K2411T	benign
13	32339755	C	G	BRCA2	NC_000013.11:g.32339755C>G	NM_000059.4:c.5400C>G	Y1800*	pathogenic
13	32341145	T	C	BRCA2	NC_000013.11:g.32341145T>C	NM_000059.4:c.6790T>C	L2264=	likely_benign
13	32333251	TTATG	T	BRCA2	NC_000013.11:g.32333252_32333255del	NM_000059.4:c.1774_1777del	Y592Lfs*21	pathogenic
13	32319330	G	C	BRCA2	NC_000013.11:g.32319330G>C	NM_000059.4:c.316+5G>C	?	pathogenic
13	32370503	T	TC	BRCA2	NC_000013.11:g.32370503_32370504insC	NM_000059.4:c.8433_8434insC	G2812Rfs*8	pathogenic
13	32340144	T	G	BRCA2	NC_000013.11:g.32340144T>G	NM_000059.4:c.5789T>G	L1930*	pathogenic
13	32332333	G	GTCAA	BRCA2	NC_000013.11:g.32332335_32332338dup	NM_000059.4:c.857_860dup	M287Ifs*9	pathogenic
13	32340435	G	GA	BRCA2	NC_000013.11:g.32340436dup	NM_000059.4:c.6081dup	E2028Rfs*21	pathogenic
13	32339554	C	T	BRCA2	NC_000013.11:g.32339554C>T	NM_000059.4:c.5199C>T	S1733=	benign
13	32332299	TTAAAG	T	BRCA2	NC_000013.11:g.32332304_32332308del	NM_000059.4:c.826_830del	V276*	pathogenic
13	32319111	A	AC	BRCA2	NC_000013.11:g.32319112dup	NM_000059.4:c.103dup	L35Pfs*9	pathogenic
13	32362688	A	G	BRCA2	NC_000013.11:g.32362688A>G	NM_000059.4:c.7971A>G	K2657=	likely_benign
13	32336641	TC	T	BRCA2	NC_000013.11:g.32336642del	NM_000059.4:c.2287del	H763Mfs*9	pathogenic
13	32336566	A	C	BRCA2	NC_000013.11:g.32336566A>C	NM_000059.4:c.2211A>C	A737=	likely_benign
13	32368935	C	T	BRCA2	NC_000013.11:g.32368935C>T	NM_000059.4:c.8332-1467C>T	?	benign
13	32379766	G	A	BRCA2	NC_000013.11:g.32379766G>A	NM_000059.4:c.8970G>A	W2990*	pathogenic
13	32340016	GA	G	BRCA2	NC_000013.11:g.32340020del	NM_000059.4:c.5665del	I1889Lfs*20	pathogenic
[truncated: 2,082 more rows]

## Sheet: ATM (training)
hgvs_genomic_38	hgvs_coding	hgvs_protein	chromosome	position	ref_allele	alt_allele	gene_symbol	pathogenicity_original
NC_000011.10:g.108222889A>T			11	108222889	A	T	ATM	likely_benign
NC_000011.10:g.108223106G>A	NM_000051.4:c.-111G>A		11	108223106	G	A	ATM	benign
NC_000011.10:g.108227415C>T	NM_000051.4:c.-30-180C>T		11	108227415	C	T	ATM	likely_benign
NC_000011.10:g.108227516A>G	NM_000051.4:c.-30-79A>G		11	108227516	A	G	ATM	benign
NC_000011.10:g.108227607G>A	NM_000051.4:c.-18G>A		11	108227607	G	A	ATM	benign_or_likely
NC_000011.10:g.108227625A>C	NM_000051.4:c.1A>C	p.Met1Leu	11	108227625	A	C	ATM	pathogenic_or_likely
NC_000011.10:g.108227625A>G	NM_000051.4:c.1A>G	p.Met1Val	11	108227625	A	G	ATM	pathogenic_or_likely
NC_000011.10:g.108227626T>C	NM_000051.4:c.2T>C	p.Met1Thr	11	108227626	T	C	ATM	pathogenic
NC_000011.10:g.108227627G>C	NM_000051.4:c.3G>C	p.Met1Ile	11	108227627	G	C	ATM	pathogenic
NC_000011.10:g.108227627G>A	NM_000051.4:c.3G>A	p.Met1Ile	11	108227627	G	A	ATM	pathogenic_or_likely
NC_000011.10:g.108227632del	NM_000051.4:c.8del	p.Leu3fs	11	108227632	T		ATM	pathogenic_or_likely
NC_000011.10:g.108227633A>C	NM_000051.4:c.9A>C	p.Leu3=	11	108227633	A	C	ATM	benign_or_likely
NC_000011.10:g.108227633A>G	NM_000051.4:c.9A>G	p.Leu3=	11	108227633	A	G	ATM	benign_or_likely
NC_000011.10:g.108227638_108227639delinsTTT	NM_000051.4:c.15dup	p.Asn6Ter	11	108227638	TT	TTT	ATM	pathogenic_or_likely
NC_000011.10:g.108227638_108227639delinsT	NM_000051.4:c.15del	p.Asn6fs	11	108227638	TT	T	ATM	pathogenic_or_likely
NC_000011.10:g.108227640_108227641delinsAAA	NM_000051.4:c.17dup	p.Asn6fs	11	108227640	AA	AAA	ATM	pathogenic
NC_000011.10:g.108227639T>G	NM_000051.4:c.15T>G	p.Leu5=	11	108227639	T	G	ATM	likely_benign
NC_000011.10:g.108227640_108227644delinsA	NM_000051.4:c.17_20del	p.Asn6fs	11	108227640	AATGA	A	ATM	pathogenic
NC_000011.10:g.108227646C>T	NM_000051.4:c.22C>T	p.Leu8=	11	108227646	C	T	ATM	benign_or_likely
NC_000011.10:g.108227648G>A	NM_000051.4:c.24G>A	p.Leu8=	11	108227648	G	A	ATM	benign_or_likely
NC_000011.10:g.108227651delinsCC	NM_000051.4:c.27delinsCC	p.Ile10fs	11	108227651	T	CC	ATM	pathogenic
NC_000011.10:g.108227654C>T	NM_000051.4:c.30C>T	p.Ile10=	11	108227654	C	T	ATM	benign_or_likely
NC_000011.10:g.108227666A>G	NM_000051.4:c.42A>G	p.Gln14=	11	108227666	A	G	ATM	benign_or_likely
NC_000011.10:g.108227667del	NM_000051.4:c.43del	p.Gln14_Leu15insTer	11	108227667	C		ATM	pathogenic
NC_000011.10:g.108227669A>G	NM_000051.4:c.45A>G	p.Leu15=	11	108227669	A	G	ATM	benign_or_likely
NC_000011.10:g.108227672A>G	NM_000051.4:c.48A>G	p.Glu16=	11	108227672	A	G	ATM	benign_or_likely
NC_000011.10:g.108227674_108227675del	NM_000051.4:c.50_51del	p.His17fs	11	108227674	AT		ATM	pathogenic
NC_000011.10:g.108227675T>C	NM_000051.4:c.51T>C	p.His17=	11	108227675	T	C	ATM	benign_or_likely
NC_000011.10:g.108227678T>C	NM_000051.4:c.54T>C	p.Asp18=	11	108227678	T	C	ATM	likely_benign
NC_000011.10:g.108227683C>G	NM_000051.4:c.59C>G	p.Ala20Gly	11	108227683	C	G	ATM	likely_pathogenic
NC_000011.10:g.108227684T>C	NM_000051.4:c.60T>C	p.Ala20=	11	108227684	T	C	ATM	benign_or_likely
NC_000011.10:g.108227687A>G	NM_000051.4:c.63A>G	p.Thr21=	11	108227687	A	G	ATM	benign_or_likely
NC_000011.10:g.108227689_108227690delinsA	NM_000051.4:c.66del	p.Glu22fs	11	108227689	AA	A	ATM	pathogenic
NC_000011.10:g.108227690A>G	NM_000051.4:c.66A>G	p.Glu22=	11	108227690	A	G	ATM	benign_or_likely
NC_000011.10:g.108227691C>A	NM_000051.4:c.67C>A	p.Arg23=	11	108227691	C	A	ATM	benign_or_likely
NC_000011.10:g.108227691C>T	NM_000051.4:c.67C>T	p.Arg23Ter	11	108227691	C	T	ATM	pathogenic
NC_000011.10:g.108227693_108227695delinsAA	NM_000051.4:c.71del	p.Lys24fs	11	108227693	AAA	AA	ATM	pathogenic
NC_000011.10:g.108227696_108227697delinsG	NM_000051.4:c.72+1del		11	108227696	GG	G	ATM	pathogenic_or_likely
NC_000011.10:g.108227697G>A	NM_000051.4:c.72+1G>A		11	108227697	G	A	ATM	pathogenic_or_likely
NC_000011.10:g.108227698T>C	NM_000051.4:c.72+2T>C		11	108227698	T	C	ATM	pathogenic_or_likely
NC_000011.10:g.108227705T>C	NM_000051.4:c.72+9T>C		11	108227705	T	C	ATM	likely_benign
NC_000011.10:g.108227712A>C	NM_000051.4:c.72+16A>C		11	108227712	A	C	ATM	likely_benign
NC_000011.10:g.108227716C>G	NM_000051.4:c.72+20C>G		11	108227716	C	G	ATM	likely_benign
NC_000011.10:g.108227733_108227734del	NM_000051.4:c.72+37_72+38del		11	108227733	AA		ATM	benign
NC_000011.10:g.108227761C>A	NM_000051.4:c.73-15C>A		11	108227761	C	A	ATM	likely_benign
NC_000011.10:g.108227762C>T	NM_000051.4:c.73-14C>T		11	108227762	C	T	ATM	likely_benign
NC_000011.10:g.108227762C>G	NM_000051.4:c.73-14C>G		11	108227762	C	G	ATM	likely_benign
NC_000011.10:g.108227764T>C	NM_000051.4:c.73-12T>C		11	108227764	T	C	ATM	likely_benign
NC_000011.10:g.108227772T>G	NM_000051.4:c.73-4T>G		11	108227772	T	G	ATM	likely_benign
NC_000011.10:g.108227773C>G	NM_000051.4:c.73-3C>G		11	108227773	C	G	ATM	pathogenic_or_likely
NC_000011.10:g.108227774A>G	NM_000051.4:c.73-2A>G		11	108227774	A	G	ATM	pathogenic_or_likely
NC_000011.10:g.108227774_108227781delinsAGAA	NM_000051.4:c.75_78del		11	108227774	AGAAAGAA	AGAA	ATM	pathogenic_or_likely
NC_000011.10:g.108227775G>A	NM_000051.4:c.73-1G>A		11	108227775	G	A	ATM	pathogenic_or_likely
NC_000011.10:g.108227779G>C	NM_000051.4:c.76G>C	p.Glu26Gln	11	108227779	G	C	ATM	likely_benign
NC_000011.10:g.108227781A>G	NM_000051.4:c.78A>G	p.Glu26=	11	108227781	A	G	ATM	likely_benign
NC_000011.10:g.108227785_108227788delinsGA	NM_000051.4:c.84_85del	p.Lys29fs	11	108227785	GAGA	GA	ATM	pathogenic
NC_000011.10:g.108227787G>A	NM_000051.4:c.84G>A	p.Glu28=	11	108227787	G	A	ATM	likely_benign
NC_000011.10:g.108227790A>G	NM_000051.4:c.87A>G	p.Lys29=	11	108227790	A	G	ATM	benign_or_likely
NC_000011.10:g.108227791_108227793delinsTT	NM_000051.4:c.90del	p.Phe30fs	11	108227791	TTT	TT	ATM	pathogenic_or_likely
NC_000011.10:g.108227799C>T	NM_000051.4:c.96C>T	p.Arg32=	11	108227799	C	T	ATM	benign_or_likely
NC_000011.10:g.108227800C>T	NM_000051.4:c.97C>T	p.Leu33=	11	108227800	C	T	ATM	benign_or_likely
NC_000011.10:g.108227802G>A	NM_000051.4:c.99G>A	p.Leu33=	11	108227802	G	A	ATM	benign_or_likely
NC_000011.10:g.108227806C>A	NM_000051.4:c.103C>A	p.Arg35=	11	108227806	C	A	ATM	benign_or_likely
NC_000011.10:g.108227806C>T	NM_000051.4:c.103C>T	p.Arg35Ter	11	108227806	C	T	ATM	pathogenic_or_likely
NC_000011.10:g.108227808A>G	NM_000051.4:c.105A>G	p.Arg35=	11	108227808	A	G	ATM	benign_or_likely
NC_000011.10:g.108227808A>C	NM_000051.4:c.105A>C	p.Arg35=	11	108227808	A	C	ATM	likely_benign
NC_000011.10:g.108227817A>G	NM_000051.4:c.114A>G	p.Glu38=	11	108227817	A	G	ATM	benign_or_likely
NC_000011.10:g.108227820A>G	NM_000051.4:c.117A>G	p.Thr39=	11	108227820	A	G	ATM	benign_or_likely
NC_000011.10:g.108227820_108227825delinsAA	NM_000051.4:c.119_122del	p.Ile40fs	11	108227820	AATTAA	AA	ATM	pathogenic_or_likely
NC_000011.10:g.108227824A>T	NM_000051.4:c.121A>T	p.Lys41Ter	11	108227824	A	T	ATM	pathogenic_or_likely
NC_000011.10:g.108227826A>G	NM_000051.4:c.123A>G	p.Lys41=	11	108227826	A	G	ATM	likely_benign
NC_000011.10:g.108227830C>T	NM_000051.4:c.127C>T	p.Leu43=	11	108227830	C	T	ATM	likely_benign
NC_000011.10:g.108227837_108227838delinsGGG	NM_000051.4:c.135dup	p.His46fs	11	108227837	GG	GGG	ATM	pathogenic
NC_000011.10:g.108227836C>A	NM_000051.4:c.133C>A	p.Arg45=	11	108227836	C	A	ATM	benign_or_likely
NC_000011.10:g.108227838G>C	NM_000051.4:c.135G>C	p.Arg45=	11	108227838	G	C	ATM	benign_or_likely
NC_000011.10:g.108227838G>T	NM_000051.4:c.135G>T	p.Arg45=	11	108227838	G	T	ATM	benign_or_likely
NC_000011.10:g.108227838G>A	NM_000051.4:c.135G>A	p.Arg45=	11	108227838	G	A	ATM	benign_or_likely
NC_000011.10:g.108227839_108227844delinsCA	NM_000051.4:c.138_141del	p.His46fs	11	108227839	CATTCA	CA	ATM	pathogenic
NC_000011.10:g.108227841T>C	NM_000051.4:c.138T>C	p.His46=	11	108227841	T	C	ATM	benign_or_likely
NC_000011.10:g.108227843C>G	NM_000051.4:c.140C>G	p.Ser47Ter	11	108227843	C	G	ATM	pathogenic
NC_000011.10:g.108227849C>G	NM_000051.4:c.146C>G	p.Ser49Cys	11	108227849	C	G	ATM	benign
NC_000011.10:g.108227850C>T	NM_000051.4:c.147C>T	p.Ser49=	11	108227850	C	T	ATM	benign_or_likely
NC_000011.10:g.108227854C>T	NM_000051.4:c.151C>T	p.Gln51Ter	11	108227854	C	T	ATM	pathogenic
NC_000011.10:g.108227857G>T	NM_000051.4:c.154G>T	p.Gly52Ter	11	108227857	G	T	ATM	pathogenic_or_likely
NC_000011.10:g.108227860A>T	NM_000051.4:c.157A>T	p.Lys53Ter	11	108227860	A	T	ATM	pathogenic_or_likely
NC_000011.10:g.108227862A>G	NM_000051.4:c.159A>G	p.Lys53=	11	108227862	A	G	ATM	benign_or_likely
NC_000011.10:g.108227865_108227867delinsTT	NM_000051.4:c.164del	p.Tyr54_Leu55insTer	11	108227865	TTT	TT	ATM	pathogenic
NC_000011.10:g.108227871T>C	NM_000051.4:c.168T>C	p.Asn56=	11	108227871	T	C	ATM	likely_benign
NC_000011.10:g.108227873_108227875delinsGG	NM_000051.4:c.172del	p.Asp58fs	11	108227873	GGG	GG	ATM	pathogenic
NC_000011.10:g.108227873G>A	NM_000051.4:c.170G>A	p.Trp57Ter	11	108227873	G	A	ATM	pathogenic
NC_000011.10:g.108227880T>C	NM_000051.4:c.177T>C	p.Ala59=	11	108227880	T	C	ATM	benign_or_likely
NC_000011.10:g.108227882_108227886delinsTTTT	NM_000051.4:c.183del	p.Phe61fs	11	108227882	TTTTT	TTTT	ATM	pathogenic_or_likely
NC_000011.10:g.108227888_108227889delinsG	NM_000051.4:c.185+1del		11	108227888	GG	G	ATM	likely_pathogenic
NC_000011.10:g.108227889G>A	NM_000051.4:c.185+1G>A		11	108227889	G	A	ATM	likely_pathogenic
NC_000011.10:g.108227895T>C	NM_000051.4:c.185+7T>C		11	108227895	T	C	ATM	likely_benign
NC_000011.10:g.108227896A>G	NM_000051.4:c.185+8A>G		11	108227896	A	G	ATM	likely_benign
NC_000011.10:g.108227897T>G	NM_000051.4:c.185+9T>G		11	108227897	T	G	ATM	likely_benign
NC_000011.10:g.108227898T>C	NM_000051.4:c.185+10T>C		11	108227898	T	C	ATM	likely_benign
NC_000011.10:g.108227898T>G	NM_000051.4:c.185+10T>G		11	108227898	T	G	ATM	likely_benign
NC_000011.10:g.108227904T>C	NM_000051.4:c.185+16T>C		11	108227904	T	C	ATM	likely_benign
NC_000011.10:g.108229159G>A	NM_000051.4:c.186-19G>A		11	108229159	G	A	ATM	likely_benign
NC_000011.10:g.108229160C>T	NM_000051.4:c.186-18C>T		11	108229160	C	T	ATM	likely_benign
NC_000011.10:g.108229161A>G	NM_000051.4:c.186-17A>G		11	108229161	A	G	ATM	benign
NC_000011.10:g.108229167_108229170delinsTTT	NM_000051.4:c.186-8del		11	108229167	TTTT	TTT	ATM	benign_or_likely
NC_000011.10:g.108229168T>C	NM_000051.4:c.186-10T>C		11	108229168	T	C	ATM	likely_benign
NC_000011.10:g.108229170T>C	NM_000051.4:c.186-8T>C		11	108229170	T	C	ATM	likely_benign
NC_000011.10:g.108229171C>T	NM_000051.4:c.186-7C>T		11	108229171	C	T	ATM	benign_or_likely
NC_000011.10:g.108229174G>A	NM_000051.4:c.186-4G>A		11	108229174	G	A	ATM	likely_benign
NC_000011.10:g.108229177G>A	NM_000051.4:c.186-1G>A		11	108229177	G	A	ATM	likely_pathogenic
NC_000011.10:g.108229178A>G	NM_000051.4:c.186A>G	p.Arg62=	11	108229178	A	G	ATM	likely_benign
NC_000011.10:g.108229181T>C	NM_000051.4:c.189T>C	p.Phe63=	11	108229181	T	C	ATM	benign_or_likely
NC_000011.10:g.108229184del	NM_000051.4:c.192del	p.Leu64fs	11	108229184	A		ATM	pathogenic_or_likely
NC_000011.10:g.108229184A>G	NM_000051.4:c.192A>G	p.Leu64=	11	108229184	A	G	ATM	benign_or_likely
NC_000011.10:g.108229185C>T	NM_000051.4:c.193C>T	p.Gln65Ter	11	108229185	C	T	ATM	pathogenic_or_likely
NC_000011.10:g.108229190A>G	NM_000051.4:c.198A>G	p.Lys66=	11	108229190	A	G	ATM	benign_or_likely
NC_000011.10:g.108229193T>C	NM_000051.4:c.201T>C	p.Tyr67=	11	108229193	T	C	ATM	benign_or_likely
[truncated: 4,230 more rows]

## Sheet: PALB2 (training)
hgvs_genomic_38	hgvs_coding	hgvs_protein	chromosome	position	ref_allele	alt_allele	gene_symbol	pathogenicity_original
[truncated: 1,598 more rows]

[truncated: 5 more sheets: FBN1 (training), 3000 BRCA1 variants (test), 3000 BRCA2 variants  (test), FBN1 VCEP  (test), FBN1 with cardiovascular (test)]
