# Supplementary material for: VUS. Life: Leveraging Vector Embeddings for Rapid and Accurate Pathogenicity Prediction of Genetic Variants
Source: Research Square preprint supplement (doi:10.21203/rs.3.rs-8605164/v1), 2026-01-21
Supplement: Supplementary file 2 [file b600c6aa8ad178969180f84a.docx]

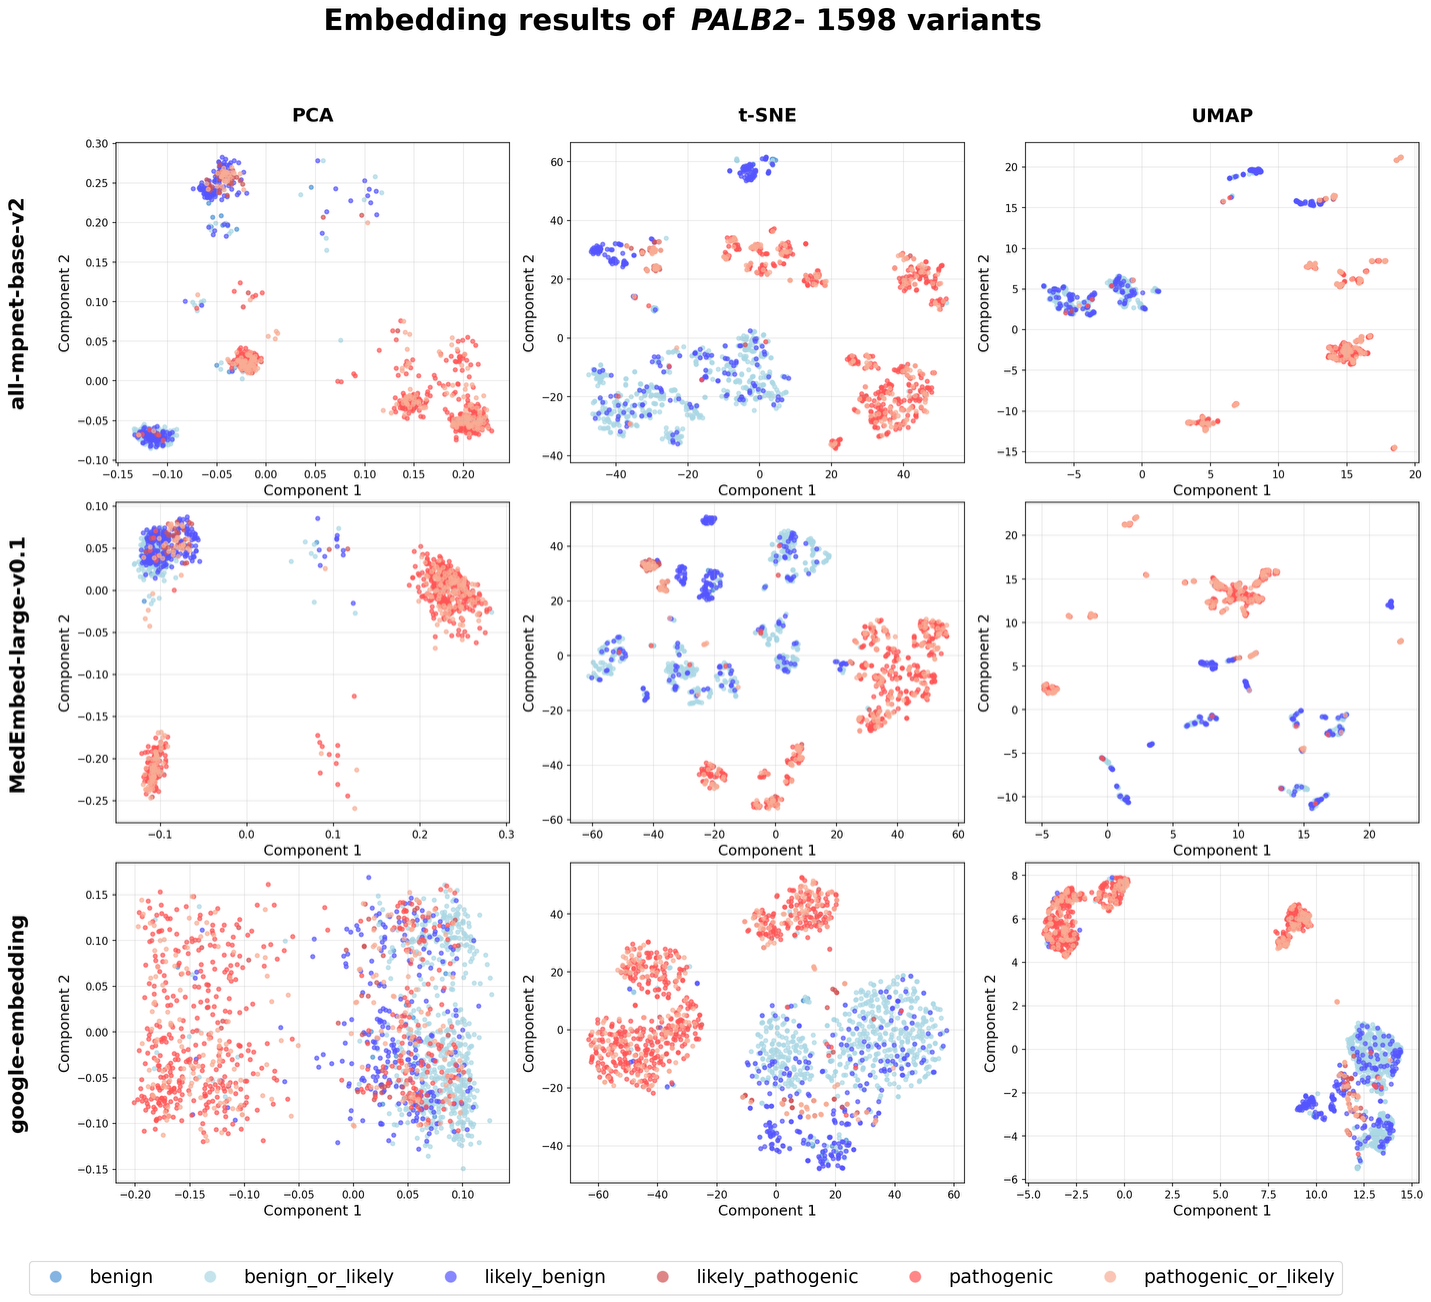


**Supplementary Figure 1**: **Visualization of semantic embeddings for 1,598 *PALB2* variants**.


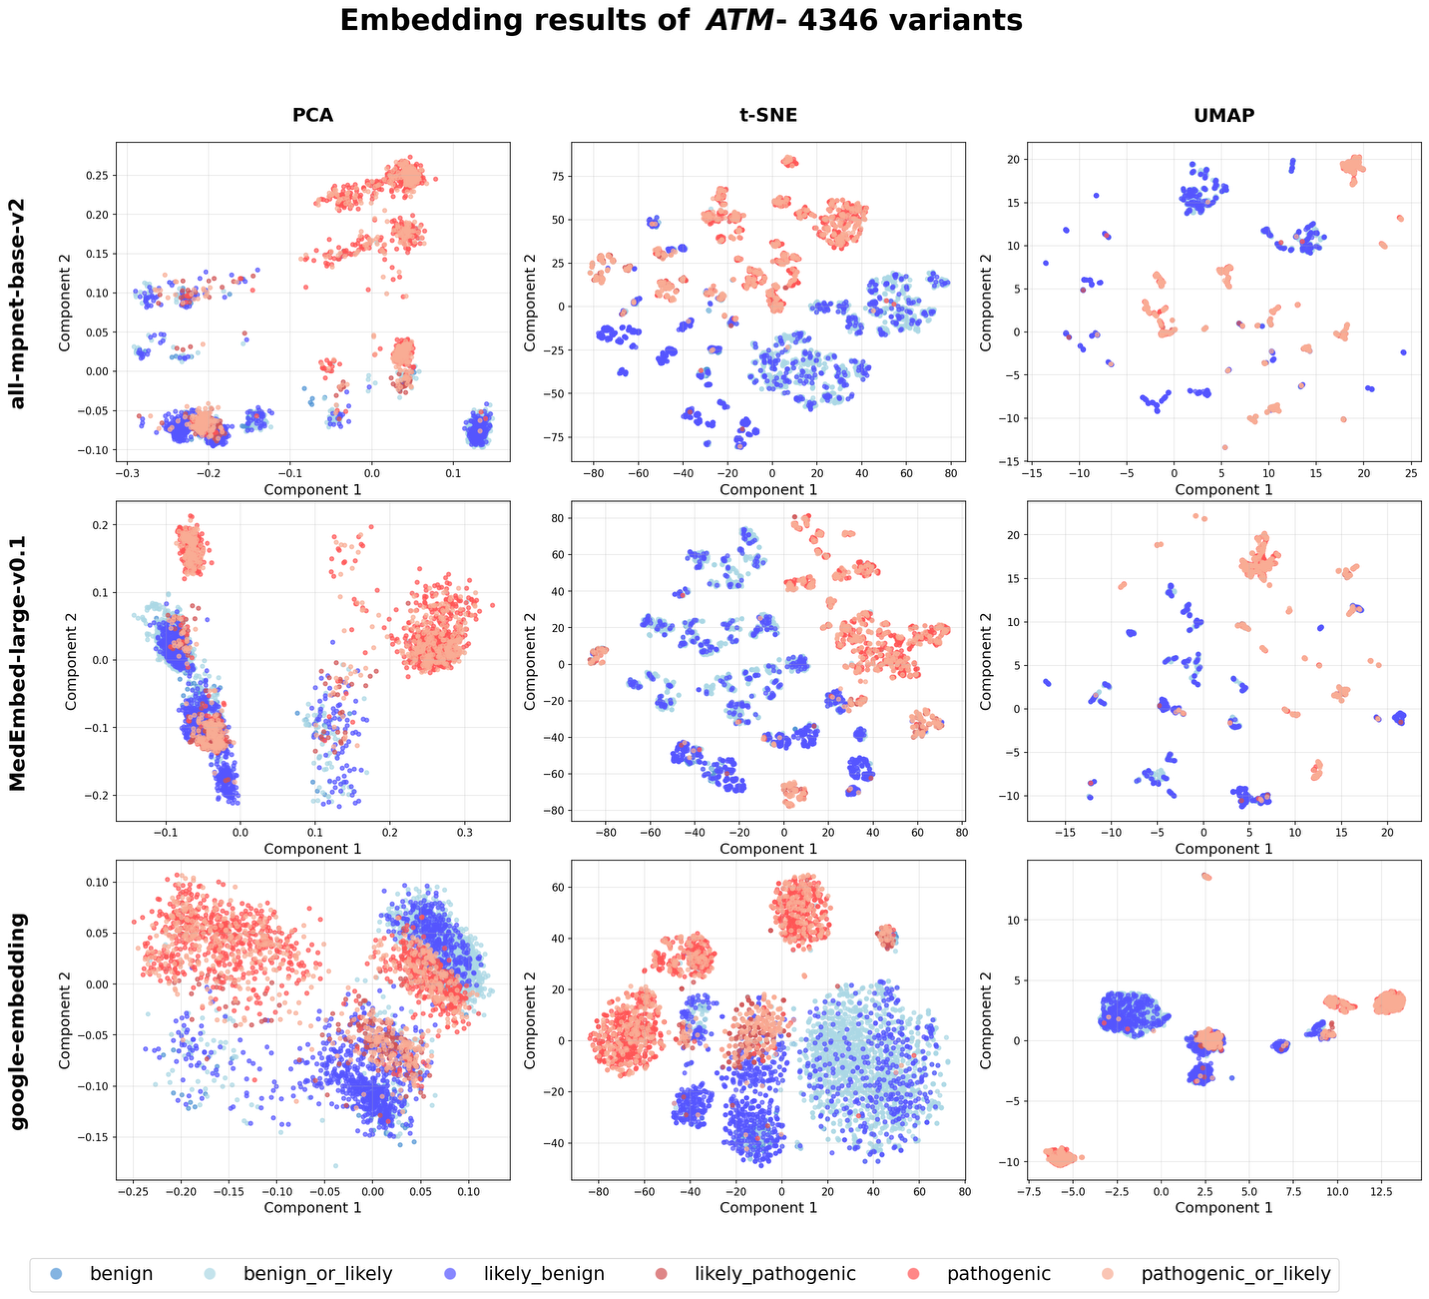


**Supplementary Figure 2**: **Visualization of semantic embeddings for 4,346 *ATM* variants**.
